# Supplementary material for: Transcriptomic Analysis for Differentially Expressed Genes in Ovarian Follicle Activation in the Zebrafish
Source: Front Endocrinol (Lausanne). 2018 Oct 11;9:593. doi: 10.3389/fendo.2018.00593 (PMC6193065; doi:10.3389/fendo.2018.00593)
Supplement: Supplementary file 2 [file Table_2.xlsx]

## Sheet: allGenes
All genes detected
geneID	geneName	NCBI_gene_ID	PG_meanCount	PV_meanCount	log2FoldChange	pvalue	padj
ENSDARG00000015208	rbb4l	322129	2516.24	1828.4	-0.458763	3.88508e-13	3.05645e-12
ENSDARG00000015201	pcmt	30751	316.753	293.558	-0.114816	0.394196	0.515853
ENSDARG00000015206	hnrnpua	566326	3457.21	3219.98	-0.102072	0.0883687	0.153653
ENSDARG00000077143	znf526	566071	1956.94	1486	-0.394656	1.51253e-10	9.65942e-10
ENSDARG00000077145	ADCY3	571825	38.5689	33.9424	-0.161075	0.627095	0.729403
ENSDARG00000059349	homer2		335.967	150.114	-1.13657	6.61729e-14	5.56913e-13
ENSDARG00000059348	rxfp3.3b	101883306	0.938489	1.68002	0.0669783	0.814368	0.873025
ENSDARG00000059347	calml4b		225.298	77.6977	-1.4609	6.4283e-14	5.41707e-13
ENSDARG00000059342	avil	678618	0	0
ENSDARG00000016951	neurog3	114411	0	2.02881	0.189244	0.372653
ENSDARG00000059340	dlgap2a	557621	113.39	85.7112	-0.368241	0.104126	0.176497
ENSDARG00000043213	adam17a	324142	459.972	968.827	1.06367	7.65496e-27	1.3587e-25
ENSDARG00000043210	nfic	100005568	2.53064	8.69681	0.494812	0.265394	0.379812
ENSDARG00000043211	ripk4	406351	1222.23	1576.84	0.364727	1.40041e-07	6.73171e-07
ENSDARG00000081453	mir100-2		0	0
ENSDARG00000081450	SNORD12		0	0
ENSDARG00000097868	BX294160.1		0	0
ENSDARG00000097869	si:dkey-1m11.6		13.6226	8.03637	-0.497257	0.29061	0.407075
ENSDARG00000097864	CR847983.2		3.06136	0	-0.420568	0.118162	0.196187
ENSDARG00000097865	CU929046.2		0	0
ENSDARG00000097867	CR381579.5		0	0
ENSDARG00000097860	CR376776.1		12.6645	4.62006	-0.120705	0.642104	0.741301
ENSDARG00000097861	CU041346.1		0	2.60847	0.226893	0.285529	0.401627
ENSDARG00000097863	si:dkeyp-84f3.9	562992	98.1373	58.5882	-0.679634	0.00743472	0.0175534
ENSDARG00000030512	tsnaxip1	565917	27.9527	16.7531	-0.546609	0.174104	0.270844
ENSDARG00000030514	acsl1a	555308	131.308	67.6324	-0.875226	0.000484548	0.00144521
ENSDARG00000034423	sncga	550229	0	1.73898	0.169941	0.419912
ENSDARG00000034420	irx6a	474317	0.703867	1.68002	0.097425	0.73312
ENSDARG00000034427	hn1l	321880	7995.28	5779.9	-0.466198	2.54523e-34	6.09545e-33
ENSDARG00000034424	atp1b2b	114457	1.40773	0	-0.174288	0.443275
ENSDARG00000074498	chd9	572355	497.691	515.234	0.0445574	0.688702	0.77917
ENSDARG00000074490	casc4	555654	2131.83	1844.56	-0.207699	0.000167248	0.000538977
ENSDARG00000093440	tnfaip6	678516	13.5357	17.9018	0.276654	0.553672	0.667541
ENSDARG00000074720	si:ch211-51h9.7	558400	562.553	453.246	-0.302859	0.00695089	0.0165611
ENSDARG00000085290	5S_rRNA		0	0
ENSDARG00000074723	myo10l1	566674	4.6837	0.579661	-0.708297	0.0937152	0.161569
ENSDARG00000074726	nrde2	794348	1807.6	1572.68	-0.201139	0.00133759	0.00369459
ENSDARG00000085291	SNORD11B		0.234622	0	-0.0595005	0.792136
ENSDARG00000074728	mfsd9	100150581	20.6296	5.37422	-1.0194	0.0367378	0.0723647
ENSDARG00000085224	5S_rRNA		0	0
ENSDARG00000018096	scap	558292	173.807	390.198	1.0929	2.61389e-08	1.34884e-07
ENSDARG00000002193	rho	30295	0.296094	1.2895	0.167021	0.556823
ENSDARG00000002190	chmp2bb	405840	1146.98	1246.68	0.117614	0.15494	0.246026
ENSDARG00000089536	erbb4b		407.453	397.568	-0.0395369	0.737592	0.81632
ENSDARG00000090847	si:ch211-209l18.4	100149940	5.01107	15.9038	0.867283	0.078078	0.138319
ENSDARG00000094747	si:ch211-197g15.6	571364	0	0
ENSDARG00000041108	ctsh	324818	13.4771	16.7008	0.166523	0.719689	0.803207
ENSDARG00000094741	zgc:173425	100003428	0	0
ENSDARG00000090840	znf980		0	1.94434	0.276781	0.282741
ENSDARG00000041107	cftr	559080	25.1118	32.6099	0.292124	0.449835	0.570972
ENSDARG00000094748	BX927218.2		1.80495	0	-0.171833	0.402973
ENSDARG00000094749	si:dkey-84o3.2	559585	2.40661	6.82338	0.325236	0.381475	0.502811
ENSDARG00000013207	zeb1b	114425	2.34622	23.0505	1.46181	0.00300112	0.00775868
ENSDARG00000092996	BX005329.3		0	0
ENSDARG00000092995	BX294113.1		0	0
ENSDARG00000092994	znf1107		0	0
ENSDARG00000092991	taar19e	100147984	0	0.523343	0.0976532	0.703901
ENSDARG00000092999	si:dkey-206m15.8	563091	0	0
ENSDARG00000092998	si:ch211-202f5.3	795321	2443.56	1506.32	-0.687588	6.70592e-18	7.57935e-17
ENSDARG00000098669	exd1		2138.29	1071.37	-0.9846	1.31522e-34	3.18488e-33
ENSDARG00000098668	BX323031.1		1.48047	1.26002	-0.0298561	0.916498	0.9444
ENSDARG00000098663	fgf19	368245	0.469245	3.5962	0.561474	0.168445	0.263509
ENSDARG00000098662	si:ch73-359m17.9	100000433	0	0
ENSDARG00000098661	AL935300.3	101885450	0	0
ENSDARG00000098660	TSTD2	100151606	84.5075	93.1544	0.129458	0.595127	0.702972
ENSDARG00000098667	grin3bb		77.4172	50.889	-0.55144	0.0464025	0.0885459
ENSDARG00000098666	si:dkey-93h22.8	449943	992.749	1084.85	0.132863	0.1114	0.186801
ENSDARG00000098665	CT583690.1		0	5.34342	0.566271	0.0420469	0.0813705
ENSDARG00000098664	si:dkeyp-53d3.3	562337	158.273	256.274	0.660186	0.000256935	0.000804524
ENSDARG00000051880	kcnj11	664687	17.0263	8.19471	-0.667243	0.146856	0.235061
ENSDARG00000075450	mkxa	799136	6.3137	116.438	3.48122	3.93927e-18	4.51768e-17
ENSDARG00000075455	soga3b	336052	7.52827	17.2124	0.62707	0.193906	0.29544
ENSDARG00000075454	hdc	793609	8.71374	10.1566	0.138016	0.77031	0.840831
ENSDARG00000051886	ankrd11	327352	2701.95	6139.72	1.1677	2.4724e-30	5.12904e-29
ENSDARG00000075456	pik3ca	561737	127.438	422.357	1.67385	3.3153e-23	4.976e-22
ENSDARG00000051888	ist1	321460	2263.1	2206.48	-0.0357442	0.513675	0.630877
ENSDARG00000051889	dhodh	494065	1531.74	1197.54	-0.349108	1.47304e-06	6.25649e-06
ENSDARG00000084173	5S_rRNA		0	0.420006	0.0452687	0.838603
ENSDARG00000084170	5S_rRNA		0	0
ENSDARG00000084175	5S_rRNA		0	0
ENSDARG00000057114	hpf1	100002184	3349.2	3337.86	-0.00740003	0.886008	0.924074
ENSDARG00000089037	BX908800.1		0	0
ENSDARG00000015985	abcc9	561160	0	1.91618	0.273583	0.287515
ENSDARG00000089031	larsa		100.458	94.4134	-0.0829932	0.749421	0.825406
ENSDARG00000089032	si:ch211-154o6.2	568558	1270.26	1287.67	0.0207176	0.799176	0.862559
ENSDARG00000089033	rrnad1	791981	286.85	196.733	-0.522322	0.000483824	0.00144327
ENSDARG00000015989	zdhhc16b	393316	289.829	482.898	0.733152	5.5863e-08	2.7913e-07
ENSDARG00000089039	zgc:173585	100124605	18.8836	1.97249	-1.60561	0.00124182	0.00345348
ENSDARG00000041300	drc3	777619	13.1723	0	-1.91343	3.2587e-05	0.000116101
ENSDARG00000099048	znf1070	100126141	0	0
ENSDARG00000099049	rragcb	100000325	272.282	301.759	0.156055	0.280154	0.396063
ENSDARG00000099040	dre-mir-430a-2		0	0
ENSDARG00000099041	U1		0.296094	0.681677	0.0505042	0.816064
ENSDARG00000099042	cfap157	794225	0	1.15932	0.147077	0.51208
ENSDARG00000099043	CR847895.1		0.888283	4.40937	0.546223	0.195887	0.297577
ENSDARG00000099044	BX548000.2		33808.6	10573.6	-1.67343	8.80056e-281	3.18483e-278
ENSDARG00000099045	cacnb2a	795492	2.66485	6.79791	0.345901	0.423848	0.545031
ENSDARG00000099046	si:ch211-227p7.5	101882512	0.703867	0.869491	0.0148475	0.958084
ENSDARG00000099047	BX323797.1		0	0.785014	0.127355	0.606835
ENSDARG00000100056	scaf8	326092	3464.05	2867.04	-0.272147	6.69448e-08	3.31955e-07
ENSDARG00000100057	ppfibp1b	561961	1303.6	1729.85	0.405726	1.03037e-10	6.67183e-10
ENSDARG00000091715	si:dkey-162h11.2		0.469245	0	-0.109564	0.674215
ENSDARG00000078728	znf1068	569852	0	0
ENSDARG00000078729	ackr4a	100003167	1.65362	2.52268	0.13787	0.754304	0.828564
ENSDARG00000091712	si:dkey-238d18.5	101884711	0	0
ENSDARG00000078725	nos1apa		7.17179	52.4709	2.22666	5.74136e-08	2.86657e-07
ENSDARG00000091718	BX649490.1	101883412	0	0
ENSDARG00000091719	U5		0.296094	0	-0.0595005	0.782557
ENSDARG00000078722	clip1a	797680	4129.42	3773.63	-0.130649	0.0431495	0.0832899
ENSDARG00000044326	BX950188.1		2.36876	1.30836	-0.0940294	0.760051	0.83247
ENSDARG00000040765	drd6b		0	1.13116	0.156242	0.502273
ENSDARG00000040764	id1	30493	184.717	304.539	0.709914	2.81509e-06	1.15089e-05
ENSDARG00000093719	BX470224.5		0	0
ENSDARG00000093717	BX901930.3		0	0
ENSDARG00000093714	artnb		0	0
ENSDARG00000093712	CABZ01021530.1	558721	0	0.785014	0.127355	0.606835
ENSDARG00000093713	si:dkey-256i11.2	100148861	0	1.30836	0.15458	0.482167
ENSDARG00000093710	CR854927.1		0	0
ENSDARG00000045302	smpx	431732	0	0.785014	0.127355	0.606835
ENSDARG00000045301	st8sia3	553510	0	0
ENSDARG00000045306	slc51a	447807	257.63	359.851	0.459993	0.000868687	0.00248294
ENSDARG00000045304	mtfr1	494035	605.787	766.029	0.34433	0.00588254	0.0142803
ENSDARG00000013979	ndfip1	324047	938.956	795.079	-0.238696	0.00262888	0.00688009
ENSDARG00000013976	anxa13	81880	279.832	384.598	0.449383	0.00250091	0.00657599
ENSDARG00000058284	CT990561.1		5.2959	18.4103	0.914501	0.0637564	0.116322
ENSDARG00000058287	gpalpp1	445079	340.068	454.942	0.424821	0.000682284	0.00198647
ENSDARG00000058280	si:dkey-208b23.5	561115	9.19534	11.1619	0.0837296	0.858072	0.905281
ENSDARG00000044655	st14b	777629	81.4704	206.753	1.24033	1.76583e-07	8.37978e-07
ENSDARG00000055708	timm8b	793663	1511.06	1354.92	-0.151061	0.05846	0.107962
ENSDARG00000096299	CR786578.2	108179004	0	3.59884	0.453602	0.0976719	0.167269
ENSDARG00000096290	AL929243.1		53.8811	38.9139	-0.375235	0.303451	0.421436
ENSDARG00000096291	ighv9-4		0	0
ENSDARG00000096292	ighj1-2		0	0
ENSDARG00000096293	BX649612.1		14.4542	24.8391	0.574753	0.203847	0.307564
ENSDARG00000096294	ighj2-4		0	0
ENSDARG00000096295	CR936968.1		19.6089	36.5658	0.7679	0.0364023	0.0717906
ENSDARG00000011190	fgfr1b	567905	402.365	464.229	0.203367	0.065751	0.119515
ENSDARG00000096297	CR954285.1		9.0695	17.8011	0.663644	0.147688	0.236171
ENSDARG00000011222	ccdc28b	559814	0	0
ENSDARG00000019438	rnf13	793981	743.178	997.246	0.416271	2.30243e-06	9.52457e-06
ENSDARG00000067795	crfb6	562820	1069.68	1571.37	0.5551	4.69338e-15	4.31209e-14
ENSDARG00000067794	cabz01076234.2	100332077	13.807	7.06355	-0.628985	0.182876	0.281821
ENSDARG00000067797	spi1a	751704	2.94968	6.44775	0.391138	0.413539	0.534624
ENSDARG00000067796	clpxb	100332309	82.6807	179.863	1.06555	6.70479e-07	2.99007e-06
ENSDARG00000061829	UNC13A	568618	1.80495	0	-0.171833	0.402973
ENSDARG00000041689	usf1	393266	622.166	780.667	0.324672	0.000928164	0.00263982
ENSDARG00000058133	foxd2	30525	0	1.73898	0.169941	0.419912
ENSDARG00000102749	CABZ01021450.3		120.001	67.2487	-0.784191	0.00307132	0.00793387
ENSDARG00000015930	rwdd1		1852.24	1286.04	-0.522454	1.3944e-10	8.93713e-10
ENSDARG00000041685	si:dkey-105h12.2	100006782	1.35753	2.04503	0.0930922	0.811788	0.871359
ENSDARG00000055554	wnt1	30128	3.77649	6.72537	0.300623	0.536416	0.651198
ENSDARG00000055552	dvl1b	560032	0	2.46504	0.325438	0.211487
ENSDARG00000055550	FO834888.1	100331324	0	1.8317	0.173418	0.407704
ENSDARG00000055551	pimr64	108181520	0	0.785014	0.127355	0.606835
ENSDARG00000055558	pimr63		0	1.103	0.15559	0.507197
ENSDARG00000055559	chrna6	555747	0	0
ENSDARG00000096874	tmem176l.3b	100331329	0.469245	3.57866	0.39743	0.251431	0.364068
ENSDARG00000096875	BX294110.1		1.17311	0	-0.167379	0.483973
ENSDARG00000096876	CR847984.1		126.121	43.6495	-1.41696	1.66835e-08	8.78072e-08
ENSDARG00000096877	CR759918.1		223.61	388.354	0.776818	7.51894e-09	4.1009e-08
ENSDARG00000096870	si:dkey-33c3.1	794519	0.592189	0	-0.113212	0.633626
ENSDARG00000096871	BX511245.1		6.89462	4.87904	-0.135632	0.762314	0.834377
ENSDARG00000096872	CU467963.1		1.79549	0	-0.252585	0.314049
ENSDARG00000096873	CR626887.1		0	0
ENSDARG00000096878	BX323807.1		2.1116	2.14837	-0.00776532	0.983036	0.989211
ENSDARG00000096879	CU462980.1		0.703867	0	-0.139354	0.595253
ENSDARG00000057956	nitr6a		0	0
ENSDARG00000053248	inab	30230	0.938489	1.04669	0.00967307	0.972288
ENSDARG00000053240	kif6	553436	2.37641	0	-0.325195	0.206197
ENSDARG00000053241	sts	402795	76.7183	99.7449	0.356813	0.187232	0.28722
ENSDARG00000053246	DEPDC7	337546	5718.16	3258.89	-0.809812	5.46566e-67	3.2465e-65
ENSDARG00000041974	brk1	415187	944.095	1134.83	0.265714	0.000874859	0.0024973
ENSDARG00000041976	il17a/f3	553962	0	0
ENSDARG00000037484	tmem192	797335	1160.31	1218.28	0.0662847	0.347348	0.46813
ENSDARG00000007804	gas6	335830	184.88	339.092	0.83534	2.28904e-05	8.30068e-05
ENSDARG00000090431	ftr04	558589	1.53068	3.27821	0.265657	0.549831	0.664079
ENSDARG00000091783	si:dkeyp-71f10.5		0	1.8317	0.173418	0.407704
ENSDARG00000061791	nyx	568821	0.592189	0.579661	-0.0109861	0.968692
ENSDARG00000061797	zgc:154006	563016	0	8.49278	1.19368	0.00175405	0.00474561
ENSDARG00000061796	rasgrp4	558453	6.71201	14.5338	0.658765	0.170602	0.266328
ENSDARG00000061794	jam3b	569217	109.338	260.985	1.18373	2.52728e-09	1.43696e-08
ENSDARG00000061798	arhgap27l	566523	19.2324	24.0502	0.269039	0.491322	0.609962
ENSDARG00000098030	BX571794.3		0	0
ENSDARG00000098031	si:ch73-144d13.8		1.18438	1.15932	-0.00460854	0.987027
ENSDARG00000098036	si:ch211-69l10.4	101883218	0	1.68266	0.238399	0.340198
ENSDARG00000095005	GZMM	556860	0	0
ENSDARG00000098034	CR848840.1		0	0.579661	0.0976532	0.685301
ENSDARG00000054734	or116-1	100150478	0	0
ENSDARG00000024101	adra1d	568614	0	0.579661	0.0976532	0.685301
ENSDARG00000024109	naa40	550325	3935.29	2798.08	-0.489358	7.3608e-23	1.08073e-21
ENSDARG00000091788	NPFFR1	100535965	0	0
ENSDARG00000003399	fgf8a	30538	75.8093	56.1904	-0.377837	0.176429	0.273742
ENSDARG00000056395	onecut3a	565854	6.62106	2.83934	-0.434096	0.345792	0.466483
ENSDARG00000056394	TOM1L2	100535615	1.17311	23.2771	1.94273	0.000148869	0.000483337
ENSDARG00000056396	dusp22a	436787	344.57	379.796	0.139301	0.241182	0.351914
ENSDARG00000023771	gabrb3	566922	0.469245	1.04669	0.0700291	0.798909
ENSDARG00000104150	SNORA30		0	0
ENSDARG00000052677	si:ch211-138g9.2		0	0
ENSDARG00000052674	csnk1a1	192307	4142.29	3511.94	-0.226359	0.293829	0.410642
ENSDARG00000052673	sept7b	100000597	2199.93	2016.89	-0.128821	0.0920772	0.159244
ENSDARG00000021688	mxa	360142	4.19553	6.5187	0.162308	0.714267	0.799157
ENSDARG00000057049	kcnk18	561821	23.2239	22.8478	-0.0395673	0.927046	0.951688
ENSDARG00000021681	asrgl1	541402	797.882	590.091	-0.430306	2.46053e-06	1.01357e-05
ENSDARG00000057042	tm2d1	100093710	850.908	869.544	0.0359646	0.671581	0.76583
ENSDARG00000022795	golt1ba	100034417	104.66	118.313	0.173888	0.405102	0.526363
ENSDARG00000103784	U1		0	0
ENSDARG00000060469	pik3r4	564088	1116.03	1420.8	0.342727	7.45774e-06	2.89625e-05
ENSDARG00000020482	nono	321994	7480.89	4736.94	-0.654698	4.53581e-28	8.47408e-27
ENSDARG00000020483	lta	554305	0	0.579661	0.0976532	0.685301
ENSDARG00000020488	arhgap17a	550254	852.142	935.681	0.125398	0.205341	0.309532
ENSDARG00000071727	si:dkey-37o8.1	407641	16355.1	5082.98	-1.68142	0	0
ENSDARG00000071725	znf1173	560662	738.885	481.439	-0.611877	5.22319e-09	2.88419e-08
ENSDARG00000071724	ankha	571148	2115.5	2199.61	0.0600853	0.317034	0.436648
ENSDARG00000022424	slc26a5	322846	593.017	857.098	0.518344	8.27047e-08	4.06186e-07
ENSDARG00000103378	U6		0	0
ENSDARG00000103379	pax6a	30567	0	0
ENSDARG00000103372	U1		0.296094	0.551502	0.0402944	0.868982
ENSDARG00000103373	CABZ01088536.1		0	0
ENSDARG00000103370	lrrc8da	497399	4.29594	9.97675	0.532315	0.282298	0.398258
ENSDARG00000103371	si:dkey-190j3.6		0	0
ENSDARG00000103376	si:ch211-127b16.6	108191774	0	0
ENSDARG00000103377	CU681855.1		18.4565	5.70019	-1.04178	0.0270661	0.0553691
ENSDARG00000103374	U1		0.530717	0.261671	-0.0632062	0.818177
ENSDARG00000103375	si:ch211-161m3.4	108183503	23.9983	21.5073	-0.118312	0.762405	0.834393
ENSDARG00000020158	spag6	431757	0	0
ENSDARG00000028306	prph	30259	0	0
ENSDARG00000101846	fastkd5	569940	1285.43	1219.45	-0.0796316	0.381587	0.502864
ENSDARG00000101847	BX088718.1		0	0
ENSDARG00000101844	mibp2	386710	4263.06	2908.49	-0.546562	7.72871e-25	1.25967e-23
ENSDARG00000101845	FP016142.5		0	0
ENSDARG00000101842	znf1086	101882544	0	0
ENSDARG00000101843	znf1106		0	0
ENSDARG00000101840	U3		0.592189	0.579661	-0.0109861	0.968692
ENSDARG00000101841	CR792455.2		0	0
ENSDARG00000101848	dydc2	100000753	23.6335	28.4768	0.16305	0.70031	0.78847
ENSDARG00000101849	adipor2	560140	2194.33	3180.07	0.536049	5.03089e-19	6.08e-18
ENSDARG00000004291	hecw1b	563730	74.3991	255.907	1.72289	6.53536e-19	7.81604e-18
ENSDARG00000100139	si:ch211-113d22.2	565641	0	0
ENSDARG00000004296	ambp	394093	31.7245	8.59348	-1.05485	0.0289619	0.0587821
ENSDARG00000100135	dre-mir-7146		0	0
ENSDARG00000100134	FO904861.5	100006649	0.888283	0	-0.151733	0.553878
ENSDARG00000100137	il17ra2		0	0
ENSDARG00000100136	dcp1a	360153	686.685	1003.17	0.547552	1.22856e-09	7.22496e-09
ENSDARG00000100131	cdh29		30.4146	38.6457	0.25002	0.501077	0.618927
ENSDARG00000100130	U6		0	0
ENSDARG00000100133	lect1	791772	0	0
ENSDARG00000100132	CU929402.2		0	0
ENSDARG00000087645	znf1064		0	0
ENSDARG00000087647	sept7a		986.767	1107.27	0.166397	0.0453762	0.0869185
ENSDARG00000087646	runx1		0	9.21191	1.43964	0.000570313	0.00168227
ENSDARG00000087641	cdh26.2	101882238	0	0
ENSDARG00000087640	nsfl1c	492805	2249.88	2069.25	-0.11549	0.073657	0.131477
ENSDARG00000036619	MGAT3	570828	1.65362	9.91219	0.927889	0.0516922	0.097113
ENSDARG00000018281	cfap161	550471	158.638	206.812	0.371016	0.0432506	0.0834686
ENSDARG00000036613	tab1		300.492	205.474	-0.519578	0.00124144	0.00345291
ENSDARG00000018283	cyba	393551	18.2128	28.3655	0.458935	0.260638	0.374321
ENSDARG00000036616	gpr182	323641	4.30721	13.1529	0.797432	0.105711	0.178657
ENSDARG00000033227	lect2l	567278	2.35749	0	-0.343611	0.190982
ENSDARG00000076189	ccdc88b	100330741	147.969	72.4042	-0.988256	1.50597e-05	5.59818e-05
ENSDARG00000076182	stat1b	368481	2.58084	10.8329	0.473656	0.24778	0.359608
ENSDARG00000076183	frrs1a		0	0
ENSDARG00000076186	lrrc3cb		4.36868	8.31559	0.385137	0.434202	0.555504
ENSDARG00000086118	U5		0.897746	0	-0.113212	0.570208
ENSDARG00000086119	U6		0	0
ENSDARG00000038508	chrnb3b	317643	431.89	220.471	-0.953391	3.68132e-12	2.68735e-11
ENSDARG00000086112	si:ch211-266i6.3	568826	9100.19	7212.52	-0.33629	7.8476e-14	6.55375e-13
ENSDARG00000038505	polr2h	550263	596.276	762.565	0.36039	0.000735433	0.00213074
ENSDARG00000086116	dre-mir-430b-4		0	0
ENSDARG00000086117	umod		0	0
ENSDARG00000086114	CR792417.1		0	0
ENSDARG00000028071	bmp1a	572452	734.899	883.076	0.263611	0.00165215	0.00449108
ENSDARG00000054096	rbm41	492764	130.194	150.2	0.199304	0.309981	0.428557
ENSDARG00000019881	bsg	337692	9646.43	6442.86	-0.579592	3.97569e-39	1.10516e-37
ENSDARG00000056801	sufu	100001615	3052.43	2455.2	-0.312309	9.79699e-05	0.000326767
ENSDARG00000056803	ap1s1	393279	1188.8	1540.05	0.373879	2.82526e-06	1.15432e-05
ENSDARG00000056805	plch2b		15.2904	18.2092	0.115499	0.813915	0.872998
ENSDARG00000056804	IL4I1	337166	0.592189	0	-0.113212	0.633626
ENSDARG00000056806	PDE5A		38.1047	27.1565	-0.375073	0.38682	0.508321
ENSDARG00000024488	top2a	323733	11223.1	9593.8	-0.226279	2.06154e-06	8.58439e-06
ENSDARG00000026417	ccr12b.2	568139	9.94832	4.1384	-0.545343	0.260776	0.374465
ENSDARG00000086947	si:ch211-147m6.1		19.5616	7.94366	-0.798082	0.0947889	0.163118
ENSDARG00000102407	cep97	386640	2131.95	1258.85	-0.749104	1.31377e-19	1.64575e-18
ENSDARG00000102406	si:ch211-165e15.1		1.48047	13.0483	1.12968	0.0167516	0.0361803
ENSDARG00000102405	CABZ01014575.1		0	0
ENSDARG00000102404	tbc1d13		128.992	105.488	-0.274415	0.188104	0.288308
ENSDARG00000102403	cry2	83774	2432.08	3001.09	0.296337	1.62039e-05	6.00182e-05
ENSDARG00000102402	fut11	568888	756.578	597.078	-0.339283	0.00056437	0.00166749
ENSDARG00000102401	znf1001	798270	19.2135	29.3155	0.462816	0.244769	0.35603
ENSDARG00000102400	U6		0	0
ENSDARG00000003749	polb	554204	1074.67	1007.85	-0.0936002	0.257216	0.370359
ENSDARG00000102409	CR381540.2		0	0
ENSDARG00000102408	si:dkey-161l11.19		0	0
ENSDARG00000101262	U6		0	0
ENSDARG00000068874	si:ch211-250m6.7		12.8052	2.17785	-1.22533	0.0135696	0.0300313
ENSDARG00000101260	GPATCH2	555214	770.332	1431.59	0.875322	4.59936e-21	6.25039e-20
ENSDARG00000068876	zgc:153031	557552	0.592189	5.04535	0.723599	0.0874594	0.152234
ENSDARG00000101266	U6		0	0
ENSDARG00000068870	fance	565685	663.971	225.278	-1.51435	6.45904e-26	1.0995e-24
ENSDARG00000101264	trim35-12	566593	0	0
ENSDARG00000101268	5S_rRNA		0	0
ENSDARG00000101269	BX322665.4		0	0
ENSDARG00000030759	melk	30724	1807.41	1659.18	-0.124852	0.0518499	0.0973624
ENSDARG00000030758	guca1c	373099	3.29598	1.68002	-0.186576	0.607375	0.712487
ENSDARG00000030750	gabrr3b		15.8259	20.0177	0.24364	0.580758	0.691394
ENSDARG00000030753	prrg4	550330	1939.75	1847.29	-0.0690651	0.264285	0.378651
ENSDARG00000030756	dnmt1	30430	41338.4	28375.2	-0.542774	3.94071e-80	2.97333e-78
ENSDARG00000031489	OGN	100170815	217.798	131.133	-0.683277	0.00147154	0.00404172
ENSDARG00000007241	mycb	393141	2020.22	2196.59	0.119579	0.0459332	0.0877873
ENSDARG00000007245	rundc3aa	100148117	0	0
ENSDARG00000007244	acp2		388.533	474.279	0.28942	0.0110195	0.0249703
ENSDARG00000007247	ric8a	449546	52.5938	97.6017	0.814794	0.00276312	0.00720344
ENSDARG00000037259	ndufb6	393781	388.686	378.253	-0.0345562	0.787792	0.854377
ENSDARG00000074721	rassf9	100150148	90.1591	188.896	0.976093	1.84274e-05	6.78114e-05
ENSDARG00000080876	CU682811.1		0	0
ENSDARG00000037256	si:ch211-145b13.5	100534855	0	0
ENSDARG00000104728	BX950205.2		0	0
ENSDARG00000104729	BX950868.6		0	0
ENSDARG00000029944	parpbp	678635	2008.06	1735.83	-0.210585	0.00125264	0.00348061
ENSDARG00000104724	CABZ01087502.1		0.234622	0	-0.0595005	0.792136
ENSDARG00000104725			0	0
ENSDARG00000030289	jag1a	140421	34.544	47.7781	0.380549	0.284459	0.400612
ENSDARG00000104727	ino80da		38.2277	56.251	0.476914	0.13936	0.224942
ENSDARG00000104720	5S_rRNA		0	0
ENSDARG00000103510	CR391991.2		0	0
ENSDARG00000104723	U1		0	0.709836	0.0976532	0.643031
ENSDARG00000103516	sec24c	571870	6131.4	4820.23	-0.34706	5.86635e-10	3.54649e-09
ENSDARG00000034503	per2	140633	1384.59	2677.4	0.94018	4.28844e-36	1.09121e-34
ENSDARG00000034504	lmo1	280646	5.30717	20.96	1.04962	0.0324846	0.0650345
ENSDARG00000074126	ttc39a	100320357	17.4588	8.88727	-0.570391	0.238627	0.348967
ENSDARG00000039365	cuedc2	334351	1504.25	1443.66	-0.062334	0.470857	0.590407
ENSDARG00000074125	znf1161	559851	98.0693	115.216	0.221515	0.309657	0.42829
ENSDARG00000039363	dnajb12a	324005	2115.08	2050.9	-0.0463532	0.433038	0.554404
ENSDARG00000074120	usp2b	564054	1.87698	26.2336	1.74553	0.000453711	0.00136017
ENSDARG00000074121	dnmbp	100005174	1322.05	2206.9	0.724546	9.74322e-13	7.45797e-12
ENSDARG00000074129	edem3	559811	536.078	1166.24	1.11519	8.60742e-34	2.01445e-32
ENSDARG00000070801	opa1	492332	1588.33	1738.4	0.131374	0.0359722	0.0710643
ENSDARG00000070800	zgc:109744		1216.85	1487.22	0.286381	1.36582e-05	5.10633e-05
ENSDARG00000070809	znf516	100003866	2.36876	35.2389	1.95362	7.03774e-05	0.000239685
ENSDARG00000088375	zgc:174704	559771	0	0
ENSDARG00000069003	pcyox1l		604.838	566.063	-0.0957813	0.431093	0.552385
ENSDARG00000088376	5S_rRNA		0	0
ENSDARG00000006598	sgk2b	559050	21.2004	20.2717	-0.0572014	0.896955	0.931414
ENSDARG00000088727	CR847844.4	101884588	0	0
ENSDARG00000069009	si:ch211-147a11.3	795658	747.746	839.878	0.15742	0.135341	0.219635
ENSDARG00000010862	amt	450000	1088.65	1203.71	0.145895	0.0709904	0.127485
ENSDARG00000031150	gba3		519.118	490.167	-0.071789	0.517487	0.634226
ENSDARG00000098468	U6		0	0
ENSDARG00000004576	plk4	368390	1035.6	1545.97	0.580473	4.84452e-12	3.49084e-11
ENSDARG00000098460	ccl39.5		0.592189	0	-0.113212	0.633626
ENSDARG00000004574	gtf3c2	563394	465.046	824.897	0.820838	4.05423e-17	4.36517e-16
ENSDARG00000098462	CU570782.2		0	0
ENSDARG00000098465	si:ch73-366l1.5	100003714	339.51	288.66	-0.225264	0.108596	0.182885
ENSDARG00000098467	BX908757.1		0	0
ENSDARG00000098466	ube2a	797853	927.52	695.864	-0.394756	0.0187139	0.0399156
ENSDARG00000080258	U6		0	0
ENSDARG00000080253	SNORD83		0.234622	0.551502	0.0505134	0.862384
ENSDARG00000080256	5S_rRNA		0	0
ENSDARG00000075297	trnt1	415249	536.601	885.032	0.723728	2.23589e-09	1.27984e-08
ENSDARG00000075296	fam83c	570133	9.59256	29.8766	1.18477	0.00548171	0.0134106
ENSDARG00000075295	tulp1a		0	6.65284	0.999668	0.00575153	0.0139953
ENSDARG00000075292	myo15aa		31.4804	36.7898	0.16655	0.644868	0.74354
ENSDARG00000042151	skia	30101	34.0921	170.476	2.09891	7.33367e-13	5.66909e-12
ENSDARG00000061268	ago2	570630	125.906	147.007	0.192362	0.368183	0.489525
ENSDARG00000075299	aaed1	100332791	131.587	105.386	-0.290112	0.204745	0.3088
ENSDARG00000042159	RFESD	559859	43.9128	40.9334	-0.0664104	0.835499	0.888707
ENSDARG00000006621	pspc1	692285	612.457	576.123	-0.0862978	0.359126	0.480358
ENSDARG00000006624	ppp2r2ab	327263	3497.85	2964.29	-0.239526	2.32821e-06	9.62306e-06
ENSDARG00000092609	aup1	324654	1656.47	1122.96	-0.557373	5.03855e-15	4.62269e-14
ENSDARG00000092608	si:dkey-262g12.12	798048	9.8763	13.9701	0.287617	0.548628	0.662876
ENSDARG00000092607	BX936298.2		0	0
ENSDARG00000092606	CU855900.1		0	0
ENSDARG00000092605	znf1003	793476	8.56897	6.37923	-0.227103	0.63805	0.738003
ENSDARG00000092604	si:ch211-15j1.4	101884104	0	0
ENSDARG00000092603	si:dkey-181m19.17		0	0.28983	0.0452687	0.838603
ENSDARG00000092602	BX546499.1		7.76398	5.08175	-0.250207	0.603851	0.709589
ENSDARG00000092600	si:dkey-256e7.5		0	0.579661	0.0976532	0.685301
ENSDARG00000089232	prr14	100001119	2429.56	3846.22	0.65983	2.87547e-24	4.55737e-23
ENSDARG00000089233	CSGALNACT1	101886904	3.81434	2.46768	-0.134935	0.749275	0.825374
ENSDARG00000089230	si:ch211-253b8.2	562114	1530.95	1223.52	-0.319513	1.16048e-05	4.38138e-05
ENSDARG00000089236	mettl15	560573	644.975	412.886	-0.630162	2.59065e-08	1.33756e-07
ENSDARG00000089237	vsig10l	100333975	2.94968	4.32622	0.169462	0.720889	0.804125
ENSDARG00000089234	U6		0	0.420006	0.0452687	0.838603
ENSDARG00000089235	tspearb	555223	1.82677	3.01918	0.163353	0.703167	0.791111
ENSDARG00000035679	si:rp71-45k5.4	403015	1349.86	1592.65	0.235737	0.00102931	0.00290593
ENSDARG00000035678	zgc:91910	445276	2455.82	2189.61	-0.163545	0.00313928	0.00809124
ENSDARG00000013719	gtse1	553652	2866.51	2599.55	-0.140016	0.0188137	0.0400804
ENSDARG00000035677	bmp8a	561963	0	0
ENSDARG00000035676	ptp4a2b	334483	5441.99	4565.18	-0.250891	2.77413e-09	1.56955e-08
ENSDARG00000070119	ctc1		2017.66	1062.83	-0.916273	6.99886e-39	1.92095e-37
ENSDARG00000079463	man2b2	100003570	1829.61	1631.57	-0.162816	0.00550082	0.0134455
ENSDARG00000070110	opn5	564181	1.17311	33.2366	2.48381	2.10169e-06	8.74227e-06
ENSDARG00000070116	nit1	447900	193.025	197.404	0.0324843	0.850817	0.899772
ENSDARG00000088189	si:ch211-135n15.3		17.7916	14.3487	-0.192891	0.665988	0.761631
ENSDARG00000084403	5S_rRNA		0	0
ENSDARG00000088181	mpped1	799266	58.6681	41.4687	-0.446745	0.154991	0.246087
ENSDARG00000084401	U6		0	0
ENSDARG00000088187	CR381544.1		27.3853	56.7664	0.874973	0.0115651	0.0260856
ENSDARG00000084404	U6		0	0
ENSDARG00000009023	ankrd28b	560747	6363.71	5988.09	-0.0885429	0.0536638	0.10022
ENSDARG00000102183	U6		0	0
ENSDARG00000009021	chrna1	30725	10.7639	112.042	2.76276	5.34808e-14	4.55589e-13
ENSDARG00000009020	cnr1	404209	0	0
ENSDARG00000102186	U6		0	0
ENSDARG00000009026	ANK2	568926	161.088	149.081	-0.114109	0.578106	0.689031
ENSDARG00000102184	mib1	352910	324.86	622.714	0.908669	8.78179e-13	6.75113e-12
ENSDARG00000102185	si:ch211-199f5.1	100002026	0	0
ENSDARG00000102188	CU694264.1		0	0.28983	0.0452687	0.838603
ENSDARG00000102189	si:ch211-106g8.47		0	0
ENSDARG00000083759	SNORA53		0.601652	0	-0.0595005	0.782557
ENSDARG00000083753	5S_rRNA		0	0
ENSDARG00000094744	CR354435.7	560238	29.0982	8.51138	-1.26887	0.00371166	0.00940891
ENSDARG00000087985	znf365	799320	9.27393	11.297	0.144826	0.763796	0.835541
ENSDARG00000000503	stx1b	58038	1.48047	0.785014	-0.0800257	0.774195
ENSDARG00000087983	igsf5a	561211	5.28246	3.92507	-0.0645998	0.863609	0.908714
ENSDARG00000087981	slc6a11b	100150472	0.888283	0	-0.151733	0.553878
ENSDARG00000093557	BX842699.1		0	0
ENSDARG00000093550	BX005438.1		0	0
ENSDARG00000093551	pimr152	799289	0	0
ENSDARG00000087989	U6		0.234622	0.551502	0.0505134	0.862384
ENSDARG00000069910	gtf2f2a	415217	365.722	416.166	0.186497	0.186624	0.286551
ENSDARG00000069912	hmga2	324428	0.938489	12.1907	1.27817	0.00854923	0.0198726
ENSDARG00000069917	ska3	570479	2387.6	1723.65	-0.470158	2.86055e-16	2.88149e-15
ENSDARG00000039719	mrps26	436691	1543.94	1087.98	-0.496376	5.49752e-09	3.02797e-08
ENSDARG00000090842	U6		0	0.420006	0.0452687	0.838603
ENSDARG00000044415	tlr5a	403138	14.8543	5.51238	-0.9008	0.0551417	0.102568
ENSDARG00000044414	csmd1a	550553	0	0
ENSDARG00000044417	disp1	619201	37.0262	38.0163	0.00225425	0.995092	0.997045
ENSDARG00000055133	cenpf	497403	1170.86	1569.15	0.411313	0.0016035	0.00436855
ENSDARG00000093785	taar17a		0	0
ENSDARG00000013203	RAC1		8.09027	11.2676	0.333214	0.476868	0.596298
ENSDARG00000055138	zgc:110410	553618	11.5707	3.28883	-0.83118	0.0857856	0.149828
ENSDARG00000082809	dre-mir-458		0	0
ENSDARG00000004167	zgc:110366	550476	166.525	131.823	-0.335908	0.0980569	0.167796
ENSDARG00000086786	mfsd10	550360	139.018	159.602	0.167548	0.452505	0.573392
ENSDARG00000087323	U5		0	0.420006	0.0452687	0.838603
ENSDARG00000087327	cbx8a	100150672	414.366	745.197	0.8378	1.96307e-11	1.35079e-10
ENSDARG00000087324	crygm2d1	553710	0	0
ENSDARG00000087328	U4		0	0
ENSDARG00000058734	prdx1	541344	1148.75	1137.11	-0.00721009	0.938868	0.959048
ENSDARG00000015506	klf5a	100006043	5.62219	15.8929	0.924316	0.0506321	0.0954333
ENSDARG00000058731	slc2a6	560602	10.8992	3.51172	-0.548229	0.227149	0.3358
ENSDARG00000058730	rdh10a	562840	109.117	167.825	0.585361	0.0061082	0.0147713
ENSDARG00000058733	ihha	619520	0	0
ENSDARG00000058732	scgn	573010	0	1.04669	0.142437	0.535018
ENSDARG00000058738	SLC26A6	557779	0.469245	50.3616	3.48922	1.35299e-08	7.18091e-08
ENSDARG00000074915	etaa1	558278	2247.62	2144.29	-0.0649502	0.243141	0.354164
ENSDARG00000074914	CU929346.1		1.17311	4.96088	0.522086	0.237363	0.347738
ENSDARG00000074910	crtc2	799532	153.438	163.523	0.0819265	0.669193	0.76391
ENSDARG00000074919	CU929052.1		0.938489	0	-0.156085	0.536141
ENSDARG00000101914	metrnl	406258	1079.46	1989.44	0.877124	6.31611e-29	1.23183e-27
ENSDARG00000016858	smad7	326282	30.6918	181.998	2.27394	1.13491e-15	1.09146e-14
ENSDARG00000059060	lgalsla	723995	5.07255	6.58722	0.135812	0.78294	0.850862
ENSDARG00000016856	pon2	335176	416.712	393.11	-0.081251	0.547925	0.662187
ENSDARG00000101916	si:dkeyp-44d3.5		0	0
ENSDARG00000059064	rassf3	792539	455.048	700.574	0.593928	3.93201e-05	0.000138524
ENSDARG00000016855	sf3b5	436751	725.385	726.522	0.00587933	0.948093	0.965252
ENSDARG00000033140	desi1a	393673	93.1052	79.2449	-0.187894	0.486718	0.605554
ENSDARG00000101917	pmfbp1		0	0
ENSDARG00000033144	psme2	30647	17.1455	66.3579	1.51058	0.000112722	0.000372726
ENSDARG00000042970	gng8	553609	0	0
ENSDARG00000042972	zgc:136605	664695	0	5.27886	0.921297	0.0110378	0.0250031
ENSDARG00000042974	sypa	559698	35.3376	42.9798	0.18586	0.634644	0.735616
ENSDARG00000042975	auh	445182	278.976	245.23	-0.188762	0.21454	0.320678
ENSDARG00000042977	nfil3	445509	147.569	204.654	0.443832	0.0250222	0.0517463
ENSDARG00000042978	cyp2p6	393108	25.5261	16.6659	-0.318897	0.513046	0.630358
ENSDARG00000081869	dre-mir-199-3		0	0
ENSDARG00000081868	dre-mir-200b		0	0
ENSDARG00000078108	dok1a	559168	0	0
ENSDARG00000078109	usp12a	565736	705.585	701.227	-0.00836506	0.932647	0.95458
ENSDARG00000077339	ptrh2	791795	449.636	578.624	0.363296	0.00292522	0.00758455
ENSDARG00000078105	depdc5	562995	866.706	778.785	-0.158803	0.0902814	0.156519
ENSDARG00000078106	ocrl	777716	1162.18	2027.39	0.793548	3.54753e-22	5.08615e-21
ENSDARG00000078101	si:dkey-121n8.3	570229	2.12287	1.26002	-0.129974	0.703986	0.791603
ENSDARG00000078102	si:ch211-150i13.1		37.4772	54.6257	0.464731	0.135698	0.220097
ENSDARG00000000086	itsn1	368504	1356.49	1339.29	-0.0194257	0.805064	0.866712
ENSDARG00000025535	clint1a	323870	848.113	1810.16	1.09443	8.00283e-47	2.80271e-45
ENSDARG00000017811	si:ch211-210c8.6		454.772	552.436	0.287568	0.0197073	0.0418153
ENSDARG00000017813	pigs	767675	1506.73	1145.46	-0.387318	6.91727e-07	3.07677e-06
ENSDARG00000014680	znf710a	327348	1311.69	1101.86	-0.25198	0.00115698	0.00323689
ENSDARG00000021444	prf1.2	103909237	0	0
ENSDARG00000021443	zfp36l1b	323671	247.607	451.147	0.821561	4.00128e-07	1.82694e-06
ENSDARG00000021442	cdh11	30461	20.6602	71.6179	1.50782	8.48728e-06	3.27202e-05
ENSDARG00000090147	U8		0	0
ENSDARG00000090145	tmem240b		52.0362	59.9343	0.213298	0.523592	0.639663
ENSDARG00000090142	si:dkey-94l16.4	101885814	183.402	247.502	0.424326	0.00655821	0.0157407
ENSDARG00000090140	tmem196b		0	0
ENSDARG00000096575	si:dkey-182i3.9	103908689	53.876	257.67	2.12611	5.58278e-19	6.70551e-18
ENSDARG00000090149	zgc:163040	100038789	24.1933	7.13476	-1.15547	0.0136608	0.0302161
ENSDARG00000075459	ptpn20		30.4695	35.4747	0.1333	0.742569	0.820353
ENSDARG00000012368	ttc21b	569823	699.164	641.358	-0.114362	0.281101	0.396913
ENSDARG00000012369	rdh10b	378722	13283.8	12893	-0.0421225	0.234376	0.344415
ENSDARG00000012366	fbp2	445505	0	0.869491	0.132297	0.583103
ENSDARG00000012367	trim46a	569905	0.938489	0	-0.156085	0.536141
ENSDARG00000093562	si:dkey-20i20.7		31.156	20.2996	-0.482495	0.21769	0.324667
ENSDARG00000079766	tap1	100333043	330.51	257.405	-0.348992	0.0202158	0.042769
ENSDARG00000079765	si:ch211-112f3.4	793893	18.3129	21.3559	0.191427	0.647761	0.745892
ENSDARG00000079762	si:dkey-253d23.4	555707	1.40773	2.41136	0.112506	0.756928	0.830351
ENSDARG00000079760	zgc:112998	541430	7.43003	90.2845	2.76197	2.47423e-12	1.83497e-11
ENSDARG00000020311	cnih1	406282	1886.82	1821	-0.0525153	0.586975	0.696205
ENSDARG00000079769	si:ch73-296e2.3		0	0
ENSDARG00000085416	5S_rRNA		0	0
ENSDARG00000019338	adprhl2	796446	430.941	334.371	-0.342708	0.0289639	0.0587821
ENSDARG00000095464	gstt2	393493	13.2538	17.8925	0.28631	0.523863	0.639954
ENSDARG00000095462	CELA1	100535584	0	0
ENSDARG00000095463	si:ch73-90k17.1		30121.5	14199.3	-1.08354	3.62936e-200	8.34412e-198
ENSDARG00000095460	BX000705.1		0	0
ENSDARG00000095461	pimr171		0	0
ENSDARG00000012944	myhz2	246275	1.35753	1.44915	0.00718822	0.983186	0.989289
ENSDARG00000012945	tnfsf13b	561268	0.703867	4.82008	0.450521	0.217758	0.324683
ENSDARG00000012946	syap1	393916	1168.58	1239.09	0.0853986	0.316522	0.436057
ENSDARG00000012947	ska2	449942	1778.12	2247.01	0.339969	4.30979e-08	2.18022e-07
ENSDARG00000012942	itgb5	563556	2725.64	3130.89	0.198384	0.00059062	0.00174033
ENSDARG00000012948	asb18		0.888283	0	-0.151733	0.553878
ENSDARG00000012949	scml2	559561	16.6981	84.587	1.61455	0.000282925	0.00087984
ENSDARG00000045408	tagln	751758	17.6519	85.0657	1.81096	9.90309e-07	4.31208e-06
ENSDARG00000045401	mllt10	492342	2334.81	1830.17	-0.329496	0.175324	0.272394
ENSDARG00000045402	commd3	494135	341.436	292.111	-0.220795	0.0955921	0.164312
ENSDARG00000018049	sf3b2	570994	7873	6455.45	-0.283537	8.80016e-06	3.38329e-05
ENSDARG00000018048	zgc:171704	100124619	33.2104	54.4203	0.625498	0.0807252	0.142343
ENSDARG00000018047	brms1lb	562889	529.014	877.418	0.720965	8.48081e-14	7.05843e-13
ENSDARG00000041314	ndufb9	573021	1234.36	974.387	-0.33781	0.00014037	0.000457719
ENSDARG00000041317	rangap1a	767677	995.988	893.656	-0.152573	0.0594006	0.109479
ENSDARG00000053833	mtnr1ba	30669	7.90585	0.840011	-0.985103	0.0254992	0.0526026
ENSDARG00000013014	or101-1	30356	3.86635	0	-0.705234	0.0342974	0.0681139
ENSDARG00000053831	vtnb	403026	6.64288	4.35306	-0.303691	0.535365	0.650282
ENSDARG00000018040	msantd4	570586	30.3546	35.2184	0.178275	0.623593	0.726193
ENSDARG00000078688	frs3	100330147	0.469245	3.36533	0.396644	0.260099	0.373685
ENSDARG00000015482	zgc:113518	503531	5.59091	26.0469	1.59924	0.000370789	0.00112936
ENSDARG00000078683	RNF14		6.2653	3.75586	-0.243915	0.598049	0.705237
ENSDARG00000078686	arl8a	567222	705.534	1390.04	0.977547	8.55407e-38	2.27433e-36
ENSDARG00000078685	rufy1	100330077	2429.26	2043.71	-0.250578	5.45144e-05	0.000188586
ENSDARG00000023157	cbln10	559705	1.18438	0	-0.166577	0.48507
ENSDARG00000023152	wdr73	550339	921.608	993.351	0.112068	0.235446	0.345634
ENSDARG00000023151	ucp1	83908	12.3549	7.23678	-0.369148	0.446654	0.567893
ENSDARG00000044752	p2rx4a	259258	2007.3	1559.3	-0.357225	3.72506e-07	1.7088e-06
ENSDARG00000044753	idh3b	415247	2838.53	2475.94	-0.193351	0.00063143	0.00185193
ENSDARG00000044751	ddt	415237	257.591	325.359	0.333206	0.0171928	0.0370105
ENSDARG00000078979	arhgef40	100151026	12.3785	22.7551	0.592627	0.190729	0.291485
ENSDARG00000044754	gnrh2	353222	2.40661	0	-0.21159	0.307984
ENSDARG00000044755	GCNT4	492587	2.838	0.943349	-0.308285	0.416603	0.537696
ENSDARG00000078975	igl1c3		0	0
ENSDARG00000078974	COA4	796017	731.268	529.438	-0.450557	2.17652e-05	7.91912e-05
ENSDARG00000078976	nanos1	322903	16.5912	16.9316	0.0166727	0.969148	0.980234
ENSDARG00000078970	il7r	100134973	33.2515	58.372	0.682163	0.0420179	0.0813548
ENSDARG00000078973	uckl1b	558466	840.219	820.793	-0.0306005	0.727176	0.808809
ENSDARG00000021948	tnc	30037	1.53068	1.8317	0.0334931	0.924993	0.950171
ENSDARG00000040041	mcm4	337598	17090.4	9379.87	-0.863634	2.59617e-146	4.29953e-144
ENSDARG00000040046	snai2	494038	207.418	295.753	0.483715	0.00486549	0.0120204
ENSDARG00000040045	cldn1		0	0
ENSDARG00000040048	GALNTL6	568915	15.3443	115.684	2.64615	2.22706e-17	2.43407e-16
ENSDARG00000021945	ddx23	334283	1879.2	2182.76	0.213607	0.000699964	0.00203401
ENSDARG00000056926	drd2a	282557	0	0.869491	0.132297	0.583103
ENSDARG00000056924	sap130a	100073341	722.594	1161.27	0.672686	6.12613e-14	5.18031e-13
ENSDARG00000056922	ltbp1		20.3357	40.539	0.763079	0.0464223	0.0885749
ENSDARG00000056923	dbr1	323746	2585.53	2693.7	0.0596935	0.269294	0.384071
ENSDARG00000056920	tmem88a	402969	4.6033	5.20501	0.0427177	0.929706	0.952667
ENSDARG00000056921	ankk1	100170831	0	0
ENSDARG00000018956	tmem39b	334110	803.209	767.277	-0.066488	0.478806	0.598247
ENSDARG00000018953	gclm	333974	1521.87	1324.68	-0.193125	0.00898546	0.0207754
ENSDARG00000056929	kdm6bb	563644	29.2717	158.239	2.20432	2.10593e-16	2.14344e-15
ENSDARG00000052016	cabp2a	572226	0	0
ENSDARG00000058076	snf8	492771	597.091	617.602	0.0572113	0.612819	0.716896
ENSDARG00000052010	fam96b	436722	288.845	484.218	0.736894	5.06209e-10	3.08461e-09
ENSDARG00000052011	rrad	327396	58.985	116.221	0.892902	0.000420488	0.00126652
ENSDARG00000055295	cyb561d1	447851	66.3666	100.495	0.532086	0.0447717	0.0859374
ENSDARG00000055294	atoh1a	30303	1.64236	2.94004	0.0883216	0.779875	0.848301
ENSDARG00000058079	txndc17	445062	542.404	440.592	-0.281271	0.0486134	0.0921501
ENSDARG00000055291	rab18a	325255	559.82	1073.56	0.936487	1.19052e-19	1.49422e-18
ENSDARG00000055290	mpeg1.1	335407	7.5217	14.2344	0.502106	0.298616	0.415993
ENSDARG00000055292	atg9b	791223	376.766	512.977	0.419706	0.00624685	0.0150655
ENSDARG00000097284	si:ch211-261d7.3	100537473	216.845	424.019	0.951385	1.40662e-12	1.06337e-11
ENSDARG00000039164	mhc1uma	101883648	0	0
ENSDARG00000097286	FP102892.1		0	1.26002	0.148901	0.499211
ENSDARG00000097287	si:dkey-7i4.19	103909956	47.8646	68.5755	0.445484	0.148807	0.237619
ENSDARG00000097281	znf1011		29.7606	41.0769	0.402112	0.24847	0.360448
ENSDARG00000097282	BX119902.3		0	4.9072	0.566978	0.0460256	0.0879383
ENSDARG00000097283	klhl10b.1	560378	0.888283	1.36335	0.063704	0.840916
ENSDARG00000097288	BX323076.2		0	0
ENSDARG00000097289	BX629344.1	108179327	0.592189	2.88636	0.413057	0.287883	0.404124
ENSDARG00000096489	BX248324.2		3.00826	11.7978	0.627562	0.136193	0.220803
ENSDARG00000096481	si:dkey-16p19.8		0	0
ENSDARG00000096483	BX571825.15		0	0
ENSDARG00000096484	si:ch211-181p13.2		9.79409	10.9012	0.0900899	0.84773	0.897127
ENSDARG00000096486	BX901907.4		0	0
ENSDARG00000022203	gtf2ird1	81597	29.379	51.5263	0.482056	0.311917	0.430745
ENSDARG00000019601	col12a1b	562946	7.66466	14.8356	0.488247	0.318678	0.438162
ENSDARG00000061610	ufsp1	100037378	0	0
ENSDARG00000061611	si:dkey-85k7.11	556323	0.469245	0	-0.109564	0.674215
ENSDARG00000097758	CU929206.2		0	0
ENSDARG00000097759	CR628327.1		2.66485	0.523343	-0.220973	0.433231	0.554579
ENSDARG00000097756	CT737255.2		0	0
ENSDARG00000097757	BX511010.1		23.7117	19.9561	-0.183601	0.640562	0.740184
ENSDARG00000097754	CR749763.7		85.2401	31.2614	-1.25304	6.57185e-05	0.000224837
ENSDARG00000097755	CR626882.3		24.6295	19.8528	-0.253929	0.5104	0.628061
ENSDARG00000097752	si:rp71-77l1.2	100151162	0	0
ENSDARG00000097753	slirp	368358	606.783	504.063	-0.251879	0.0501314	0.0946356
ENSDARG00000097750	CR854827.4		0	0
ENSDARG00000055746	si:ch211-238g23.1		0	0
ENSDARG00000055743	ankrd54	436851	1015.02	1057.84	0.0617178	0.479029	0.598389
ENSDARG00000055740	march9	100003493	1.80495	1.15932	-0.050079	0.859109	0.905833
ENSDARG00000074597	lzts2a	570926	7.07247	13.5246	0.435499	0.37665	0.498071
ENSDARG00000056214	gnrh3	360141	3.46804	1.30836	-0.26625	0.499965	0.617867
ENSDARG00000006025	tp53i11b	556618	849.493	1178.14	0.460678	2.34086e-06	9.66922e-06
ENSDARG00000056210	si:ch211-199o1.2	798846	117.469	115.54	-0.0235908	0.918282	0.945559
ENSDARG00000056211	ogfod2	790923	22.4582	50.7171	0.995283	0.0054993	0.0134449
ENSDARG00000056213	si:ch73-130a3.4	664763	964.736	713.385	-0.429668	1.04094e-06	4.52447e-06
ENSDARG00000056218	tnika	325042	1373.76	1685.79	0.28675	0.000104235	0.000346305
ENSDARG00000006029	lta4h	406575	1570.41	1782.68	0.181484	0.00267536	0.0069961
ENSDARG00000070358	smim12	541401	1719.58	1688.45	-0.020138	0.817134	0.875079
ENSDARG00000070351	hoxc11a		29.7329	47.7956	0.588331	0.104526	0.176975
ENSDARG00000036386	rbm4.1	573001	1958.25	1255.08	-0.633507	7.16409e-17	7.52287e-16
ENSDARG00000070352	hoxc12a	562600	0	8.13839	1.3047	0.00122866	0.00341981
ENSDARG00000036382	ponzr6	557791	1.18438	1.15932	-0.00460854	0.987027
ENSDARG00000036383	si:ch73-335m24.5	561209	1.40773	2.78435	0.188635	0.647642	0.7458
ENSDARG00000037433	fmr1	259191	2323.73	3542.38	0.609182	2.08072e-30	4.3303e-29
ENSDARG00000021163	thrb	30607	138.61	312.039	1.14975	4.22586e-12	3.06426e-11
ENSDARG00000070683	dkk3b	100038765	5.676	4.73	-0.0823543	0.85513	0.902904
ENSDARG00000070682	sdf4	406360	1779.56	1967.41	0.149539	0.0411138	0.0798258
ENSDARG00000070681	fam132a	790933	2.35749	22.0684	1.78542	0.000315614	0.000973288
ENSDARG00000070686	cdipt	404620	811.203	939.884	0.213842	0.0182561	0.0390543
ENSDARG00000070685	CR759887.1		0	0
ENSDARG00000070688	ncalda	556178	675.436	1728.91	1.33769	5.12295e-53	2.11655e-51
ENSDARG00000060058	cylda	556823	977.571	1276.1	0.372322	4.63229e-05	0.000161622
ENSDARG00000060054	epc1b	566102	3923.33	1961.14	-0.994837	1.42516e-31	3.09107e-30
ENSDARG00000060053	CABZ01057411.1		73.2998	81.4283	0.140318	0.572874	0.684282
ENSDARG00000060051	slc47a2	560024	2.2742	0.523343	-0.241468	0.447972	0.569161
ENSDARG00000054509	hesx1		0	0
ENSDARG00000068220	hbl3	100008009	6.23439	4.2885	-0.176064	0.694007	0.783494
ENSDARG00000068221	hbl1	100007982	6.27404	15.0168	0.754268	0.116622	0.193993
ENSDARG00000054501	stambpa	797422	881.148	1059.27	0.270553	0.00386287	0.00975174
ENSDARG00000104108	slco1d1	326845	3.55313	8.24838	0.35673	0.429043	0.550157
ENSDARG00000104109	CU855711.2	108191753	0	0
ENSDARG00000104104	snoMBII-202		0.530717	0.28983	-0.0590201	0.816013
ENSDARG00000104105	ttf2	555382	2912.29	2951.67	0.0159613	0.757546	0.830843
ENSDARG00000104106	CABZ01087953.1		353.418	243.762	-0.508503	0.00169163	0.00459008
ENSDARG00000104107	nkx2.4b	58112	0	2.09337	0.194596	0.359633
ENSDARG00000104100	bmpr1ba	30742	1463.22	1964.39	0.424656	3.76567e-10	2.32655e-09
ENSDARG00000104101	RIMBP2	100535071	1.87698	3.18813	0.0901371	0.782878	0.850862
ENSDARG00000104102	U6		0	0
ENSDARG00000104103	rps6kc1	564322	1192.84	1638.32	0.456903	2.53249e-11	1.72499e-10
ENSDARG00000063509	lrrc58b	564300	80.4785	136.228	0.713975	0.00209979	0.00559888
ENSDARG00000058044	rab1ba	394117	1979.1	2692.52	0.443399	1.01814e-12	7.78422e-12
ENSDARG00000052827	top3a	560212	982.351	1024.9	0.0571678	0.5024	0.620326
ENSDARG00000052826	runx3	58127	8.40637	51.2362	2.00765	7.82158e-07	3.44877e-06
ENSDARG00000037478	cdh8	564205	45.4399	161.398	1.73185	2.28376e-12	1.69887e-11
ENSDARG00000071088	adgrg7.1		0	2.09337	0.194596	0.359633
ENSDARG00000037475	foxb2	559714	0	0
ENSDARG00000071087	slc35b4	323737	160.407	391.48	1.25416	1.00361e-15	9.68464e-15
ENSDARG00000007856	rtn4rl1a		0	2.54951	0.332076	0.202067	0.305304
ENSDARG00000037476	sorbs3	541478	4124.86	2104.93	-0.969039	1.37637e-71	9.05627e-70
ENSDARG00000071082	p4ha1b	100003675	1657.08	1636.99	-0.0155457	0.834663	0.888205
ENSDARG00000071083	si:dkeyp-34c12.1	570187	2348.03	1409.02	-0.731872	3.74684e-30	7.70744e-29
ENSDARG00000037473	cd79a	798792	0	2.09337	0.194596	0.359633
ENSDARG00000071551	xrcc6	334488	2391.67	1845.25	-0.370288	3.50027e-10	2.16737e-09
ENSDARG00000071553	zgc:171500	100006475	1.18438	0.869491	-0.0388894	0.887037
ENSDARG00000071554	CU929149.1		0	0
ENSDARG00000071555	zgc:153675	768179	2147.27	2117.09	-0.0149842	0.852576	0.900841
ENSDARG00000071558	fblim1	768160	0.938489	11.1066	1.22928	0.0115848	0.0261209
ENSDARG00000103659	bco1l	393580	52.712	86.4171	0.624958	0.0257291	0.0529875
ENSDARG00000103658	hivep1	100000517	2271.91	1421.15	-0.676139	2.89427e-18	3.35667e-17
ENSDARG00000103655	si:dkey-161l11.32		0	0
ENSDARG00000103657	U6		0	0
ENSDARG00000103656	BX322605.2		0	0
ENSDARG00000103651	map3k12	404626	0	0
ENSDARG00000103650	si:ch73-329n5.1		0	0
ENSDARG00000103653	si:ch73-266m14.1	794617	4.24573	0	-0.543121	0.0542715	0.101158
ENSDARG00000103652	U6		0	0
ENSDARG00000076685	wisp1b	792714	0	36.2505	3.32228	6.10349e-09	3.34852e-08
ENSDARG00000076687	si:rp71-84d9.1		2.34622	1.30836	-0.0962572	0.756851	0.830334
ENSDARG00000076689	gramd1a	555994	163.474	248.445	0.589402	0.000883537	0.00251955
ENSDARG00000027649	cpsf3	324554	3343.64	3114.78	-0.103812	0.0396702	0.0773688
ENSDARG00000086831	BX000701.1		0.296094	0.523343	0.0297356	0.892805
ENSDARG00000086833	U6		0	0
ENSDARG00000086839	BX324216.1		0	0
ENSDARG00000086838	itga2.3		35.1521	54.5441	0.516065	0.124263	0.20471
ENSDARG00000045305	pde7a	100151215	963.456	1213.08	0.326922	5.46131e-05	0.000188894
ENSDARG00000069662	fgf11a	497640	75.0763	60.7889	-0.273581	0.311512	0.430308
ENSDARG00000069661	si:dkey-121j17.6	101886441	10.3059	40.276	1.53124	0.000105123	0.000349135
ENSDARG00000069660	chrnb1	100006941	36.47	33.4151	-0.138542	0.723306	0.806078
ENSDARG00000069669	adra2c	266752	0	0.28983	0.0452687	0.838603
ENSDARG00000045308	pola1	317740	5604.92	5040.43	-0.154203	0.0029605	0.00766584
ENSDARG00000018566	flnca	100048921	98.7255	59.815	-0.646703	0.017037	0.0367155
ENSDARG00000033382	grifin	445036	9.67295	7.35206	-0.255035	0.591426	0.700039
ENSDARG00000018562	cope	492492	3068.93	2851.3	-0.1033	0.0349375	0.0692373
ENSDARG00000033380	gyg2	561803	0	0
ENSDARG00000018569	tnfrsf1a	406471	16.2565	61.1013	1.25547	0.0060564	0.014661
ENSDARG00000013973	pex3	393197	610.247	872.486	0.519716	1.94525e-07	9.18879e-07
ENSDARG00000004318	cbwd	406536	296.985	274.166	-0.11789	0.386701	0.508198
ENSDARG00000004311	ldlrap1a	368278	2717.91	2571.21	-0.075159	0.239373	0.34977
ENSDARG00000098502	egr2a		3.96856	19.2758	1.41809	0.00298406	0.00771969
ENSDARG00000100302	si:dkey-237g15.2		1.67255	1.30836	-0.0317839	0.923425	0.949012
ENSDARG00000069594	kif13a	100331282	359.755	805.396	1.14376	5.58049e-23	8.26792e-22
ENSDARG00000100300	marveld3		112.08	58.3855	-0.859679	0.00107659	0.00302759
ENSDARG00000100301	CABZ01065328.2	100535756	0	0
ENSDARG00000062363	phex	386969	17361.9	11488.6	-0.594606	1.93317e-83	1.57409e-81
ENSDARG00000100307	adamts5	565053	13.2538	29.0313	0.805025	0.0584472	0.107956
ENSDARG00000069593	senp7a		0	0
ENSDARG00000100305	CR361568.1		0	0
ENSDARG00000100308	SEMA4F		111.379	203.788	0.840234	2.58916e-05	9.33532e-05
ENSDARG00000100309	zgc:136308	692274	0.234622	5.04535	0.869898	0.0367629	0.0724068
ENSDARG00000069598	chrm5b	561491	4.26466	0	-0.774618	0.0231264	0.0483096
ENSDARG00000006816	gtf2f2b	100148942	530.896	262.534	-0.979431	9.72347e-11	6.31492e-10
ENSDARG00000101655	sstr5	406588	0	0
ENSDARG00000101654	si:ch211-188c18.1	100034480	0	0
ENSDARG00000076025	dgkzb	100148835	39.2815	30.6924	-0.318623	0.349868	0.470811
ENSDARG00000006812	wdr26b	564794	1769.81	2165.39	0.287884	2.28387e-05	8.285e-05
ENSDARG00000076027	kif5c	565563	113.334	26.9339	-1.90675	3.41238e-12	2.50224e-11
ENSDARG00000086870	slc12a2		458.256	416.767	-0.146644	0.260444	0.374098
ENSDARG00000005518	slc5a9	564815	5.01107	3.85787	-0.182876	0.704065	0.791603
ENSDARG00000101659	SNORA17		0	0
ENSDARG00000006818	urod	30617	432.102	657.453	0.608977	6.32891e-07	2.8289e-06
ENSDARG00000086309	erlec1		4185.04	4068.03	-0.0383017	0.39429	0.515913
ENSDARG00000031836	vps37c	777738	503.053	543.917	0.11729	0.299031	0.416503
ENSDARG00000086302	proser1	556416	361.211	419.336	0.220622	0.135705	0.220097
ENSDARG00000086301	si:dkey-27j5.6		0	0
ENSDARG00000038716	casq1a	445226	44.8375	81.645	0.748122	0.0284779	0.057934
ENSDARG00000038713	tep1		942.411	1012.17	0.0941633	0.288565	0.404907
ENSDARG00000086304	HIST1H2AL	100334621	27.7814	11.3159	-0.932313	0.028371	0.0577347
ENSDARG00000080938	SNORD70		0.296094	0	-0.0595005	0.782557
ENSDARG00000039970	cnr2	795246	0	0
ENSDARG00000030129	si:ch211-87m7.2	557243	174.446	206.252	0.241534	0.148913	0.23775
ENSDARG00000080933	5S_rRNA		0	0
ENSDARG00000080931	dre-mir-18b		1.90717	0.420006	-0.245894	0.359511
ENSDARG00000080936	SNORD36		0	0
ENSDARG00000080934	5S_rRNA		0	0
ENSDARG00000024693	lysmd3	415194	1698.13	2384.48	0.492363	4.62113e-16	4.57942e-15
ENSDARG00000098501	BX248128.1		0	0
ENSDARG00000024694	myo1b	541515	2527.09	2935.64	0.213477	0.00322894	0.00829388
ENSDARG00000043133	cldnf		0	0
ENSDARG00000077644	zgc:172079	563398	2.39714	1.8317	-0.0419114	0.904022	0.936166
ENSDARG00000077645	GPR78	799848	0.469245	0	-0.109564	0.674215
ENSDARG00000077643	lypd6b	554606	5.03946	7.80154	0.332865	0.496106	0.614301
ENSDARG00000077641	thbs3a	252849	6.91058	6.45573	-0.068999	0.888075	0.925339
ENSDARG00000080685	SNORA50		0	0.261671	0.0452687	0.838603
ENSDARG00000039412	dmrta2	474350	0	1.41967	0.194822	0.417049
ENSDARG00000080681	dre-mir-730		0	0
ENSDARG00000077648	FNIP2	797213	424.129	334.923	-0.334894	0.0181059	0.0387711
ENSDARG00000005544	btbd3a	563691	396.975	919.909	1.19655	4.64815e-37	1.2063e-35
ENSDARG00000104689	CU855914.1		0	0
ENSDARG00000005547	rint1	562894	1317.1	1195.02	-0.136646	0.0816644	0.143683
ENSDARG00000005540	xpo7	407710	2691.26	3354.31	0.315727	4.18429e-10	2.5746e-09
ENSDARG00000005541	wif1	30476	2.9988	18.664	1.34256	0.00458061	0.0113828
ENSDARG00000104683	BX640408.1		0	0
ENSDARG00000104682	tpm2	415209	579.91	1156.82	0.994961	3.56423e-27	6.39598e-26
ENSDARG00000104681	si:dkeyp-87d1.1	101886478	0	0
ENSDARG00000104680	U1		1.13237	0	-0.217377	0.416673
ENSDARG00000104687	slc16a9b	445158	7.51918	21.0029	0.664038	0.175946	0.273217
ENSDARG00000005549	znf710b	100149283	834.336	743.016	-0.16388	0.0970346	0.166425
ENSDARG00000104685	grk1b	550406	0.938489	0	-0.156085	0.536141
ENSDARG00000104684	si:dkey-161l11.68		0	0
ENSDARG00000102234	si:ch211-71n6.4	100148657	9.19425	14.9738	0.427833	0.362675	0.483781
ENSDARG00000102235	CABZ01044960.1		0	0
ENSDARG00000102236	U6		0	0
ENSDARG00000081082	SNORA16		0	0
ENSDARG00000102230	si:ch211-8c17.3		0	0
ENSDARG00000081084	CU633911.1		0	0
ENSDARG00000102232	U6		0	0
ENSDARG00000102233	oxld1	100001148	0	2.88504	0.36365	0.165259	0.259543
ENSDARG00000102238	5S_rRNA		0	0
ENSDARG00000102239	CR559945.2		0	0
ENSDARG00000039443	zgc:110353	550482	0	0
ENSDARG00000089689	tex26		0	4.82008	0.531656	0.0542629	0.101158
ENSDARG00000089688	U5		0.296094	0	-0.0595005	0.782557
ENSDARG00000007034	hnrpkl	406264	127.815	67.6954	-0.855133	0.000318479	0.000981039
ENSDARG00000089684	HIST1H4K	560380	12.264	6.39809	-0.504886	0.297338	0.414627
ENSDARG00000089683	CU914164.2		0	0
ENSDARG00000002002	lmcd1	394045	1175.18	688.222	-0.762647	8.55385e-18	9.60686e-17
ENSDARG00000017385	b9d2	436667	321.186	268.147	-0.240267	0.133835	0.217515
ENSDARG00000017386	sobpb	100006088	374.873	548.52	0.534988	2.57598e-06	1.05845e-05
ENSDARG00000084540	5S_rRNA		0	0
ENSDARG00000017388	gstt1b	393556	232.669	224.722	-0.0379051	0.816467	0.874748
ENSDARG00000104979	CR388055.1		0	0.869491	0.132297	0.583103
ENSDARG00000104978	si:dkeyp-101e12.1		0	0
ENSDARG00000094139	BX511265.3		0	0
ENSDARG00000094138	CT027756.3		0	0
ENSDARG00000094137	pimr116		0	0
ENSDARG00000104974	CABZ01079267.1		0	0
ENSDARG00000094135	BX936305.1		0	0
ENSDARG00000104976	si:ch1073-67j19.2	101882838	0.592189	0	-0.113212	0.633626
ENSDARG00000094133	wu:fc21g02	324205	13.3974	17.7047	0.278036	0.534504	0.649542
ENSDARG00000094132	igf1	114433	0	0
ENSDARG00000094131	ftr19	560786	101.813	160.733	0.637699	0.00121677	0.00338962
ENSDARG00000104972	pimr199		1.2033	0.869491	-0.0265477	0.918591
ENSDARG00000009899	znf385a	100147851	1.17311	0	-0.167379	0.483973
ENSDARG00000043168	CELA1	445056	0	0
ENSDARG00000081331	dre-mir-138		0	0
ENSDARG00000081335	5S_rRNA		0	0
ENSDARG00000095665	si:ch211-191a16.2	798095	0	0
ENSDARG00000095666	CU459094.3		0	0
ENSDARG00000095667	znf1175		62.7698	34.0458	-0.788242	0.00853386	0.0198416
ENSDARG00000091563	snw1	321852	3276.77	2929.82	-0.158439	0.00811085	0.0189641
ENSDARG00000095661	BX005024.2		0	0
ENSDARG00000091561	si:dkey-156k2.4		0	0
ENSDARG00000095663	FP016213.1		0	2.02881	0.189244	0.372653
ENSDARG00000075648	sema5bb	100000009	2.94968	2.43952	-0.0770611	0.859202	0.905882
ENSDARG00000075641	steap3	100320152	0	0
ENSDARG00000075643	ifi35	559610	15.0085	31.433	0.853111	0.0305539	0.0615804
ENSDARG00000034718	tfpia	359833	19.3517	61.2144	1.05227	0.0245044	0.0508188
ENSDARG00000084300	5S_rRNA		0	0
ENSDARG00000084302	U6		0	0
ENSDARG00000034714	esyt1a	567227	6.13398	28.8795	1.39557	0.00290971	0.00754933
ENSDARG00000034717	def6c	563690	3.1843	3.36533	0.0108666	0.98046	0.987558
ENSDARG00000009782	myh11a	554168	20.826	199.777	1.16538	0.00786215	0.0184514
ENSDARG00000009783	dirc2	447858	1492.49	1410.43	-0.0841555	0.22166	0.329254
ENSDARG00000042698	si:dkey-15j16.6	100536356	0	0
ENSDARG00000042690	s1pr1	64617	25.9779	68.9273	1.10348	0.00336596	0.00861865
ENSDARG00000103624			1.2033	0	-0.113212	0.49813
ENSDARG00000045641	usp3	569679	1621.6	1533.93	-0.0825557	0.284116	0.400245
ENSDARG00000045644	ca12	100537787	0	1.04669	0.142437	0.535018
ENSDARG00000016260	fxr2	393180	4443.24	4347.5	-0.0294141	0.885889	0.924053
ENSDARG00000016263	zdhhc5a	571795	719.358	792.887	0.138411	0.194881	0.296486
ENSDARG00000092039	si:dkey-70p6.1	570575	0	0
ENSDARG00000092034	BX649633.1		0	0
ENSDARG00000092035	si:ch211-156j16.1	564557	12.5281	42.6913	1.44804	0.000185467	0.000594066
ENSDARG00000092036	CR925731.1		0	0
ENSDARG00000092030	taar18f		0.469245	0	-0.109564	0.674215
ENSDARG00000092033	si:dkey-239h2.3		203.72	61.6948	-1.62551	7.00533e-15	6.3822e-14
ENSDARG00000009250	etfb	406271	1585.55	1463.15	-0.116585	0.0573693	0.106161
ENSDARG00000009252	napepld	568061	208.31	219.447	0.0773104	0.612081	0.716202
ENSDARG00000009253	zgc:56576	393240	709.853	847.316	0.25377	0.0116195	0.0261826
ENSDARG00000098161	cntn4	571349	115.542	138.529	0.225095	0.331014	0.451566
ENSDARG00000098162	zgc:77748	393832	0	0
ENSDARG00000098163	si:dkey-161l11.10		0	0
ENSDARG00000098164	si:ch211-106m9.1		0	0
ENSDARG00000098165	CABZ01046958.1		0	0
ENSDARG00000098166	znf980		0	0
ENSDARG00000098167	si:dkey-176f19.4		0	0
ENSDARG00000098168	Metazoa_SRP		60.5189	2.524	-3.06205	1.35324e-10	8.68191e-10
ENSDARG00000083653	5S_rRNA		0	0
ENSDARG00000083654	5S_rRNA		0	0
ENSDARG00000008785	dldh	399479	2361.15	2152.45	-0.129409	0.035732	0.0706542
ENSDARG00000008784	prpf4ba	393182	779.477	1097.5	0.4835	2.73768e-07	1.27108e-06
ENSDARG00000042345	si:dkeyp-55f12.3	568418	306.345	149.539	-0.994055	3.99375e-08	2.02664e-07
ENSDARG00000042344	trmt6	563475	1557.41	1775.8	0.186161	0.00332291	0.00851847
ENSDARG00000042341	tmem251	619265	1241.69	1475.37	0.243188	0.00139272	0.00383708
ENSDARG00000008788	camk1gb	393802	9.77517	54.9896	2.00159	1.427e-07	6.85506e-07
ENSDARG00000068141	tnfsf11	100331628	0.703867	2.31864	0.159162	0.589531	0.698274
ENSDARG00000068140	si:dkey-24l11.2		113.976	135.898	0.244766	0.228493	0.337438
ENSDARG00000068143	slc39a6	324303	3606.63	2367.12	-0.60498	1.05042e-36	2.70809e-35
ENSDARG00000068145	pimr180		0	0
ENSDARG00000087828	si:dkey-211g8.9		1.67255	0.420006	-0.208824	0.419428
ENSDARG00000044596	pgap2	541417	939.723	1062.68	0.171786	0.0488832	0.0925654
ENSDARG00000044597	ncbp3	393112	4030.82	3385.36	-0.251642	2.70534e-06	1.10857e-05
ENSDARG00000068149	tprg1l	568867	26.3617	9.99159	-0.765248	0.115294	0.192259
ENSDARG00000068148	arrdc1a	100006005	1368.71	1541.9	0.164923	0.018595	0.0396836
ENSDARG00000087827	U6		0	0
ENSDARG00000087822	agap3		26.9175	86.8118	1.20753	0.00522316	0.0128375
ENSDARG00000099418	BX649198.1		0.703867	2.20469	0.267198	0.490306	0.609166
ENSDARG00000099417	CT027611.2		1.42846	5.58888	0.673209	0.141354	0.227634
ENSDARG00000099416	si:ch211-134a4.2	100535423	0	0
ENSDARG00000099415	CR759907.1		0	0
ENSDARG00000099414	BX914205.1		0	0
ENSDARG00000099413	U6		0	0
ENSDARG00000099412	bcan	334113	21.1709	36.6139	0.645151	0.0782924	0.138636
ENSDARG00000099411	zgc:158343	568780	369.029	482.045	0.383835	0.000666293	0.00194455
ENSDARG00000099410	si:dkeyp-79b7.3		0	0
ENSDARG00000008127	pcdh15b	503521	399.131	291.186	-0.446758	0.000755157	0.00218303
ENSDARG00000011196	dnajc11a	322953	2528.1	2104.07	-0.261436	3.82281e-06	1.53329e-05
ENSDARG00000002787	tle3a	30206	3563.1	2468.24	-0.52708	1.66017e-18	1.94737e-17
ENSDARG00000017602	ccng2	266794	92.4497	147.977	0.656391	0.0111745	0.0252862
ENSDARG00000096296	ighv8-3		0	0
ENSDARG00000017606	sys1	336339	1025.89	1169.16	0.187623	0.0163204	0.0353389
ENSDARG00000093076	BX677666.1		0	0
ENSDARG00000093075	BX897740.1		0	0
ENSDARG00000093074	si:ch211-139g16.8	101885410	0	0
ENSDARG00000093073	CR925713.1		0	0
ENSDARG00000093070	thumpd2	562797	531.633	326.407	-0.69334	2.32312e-09	1.32705e-08
ENSDARG00000043907	fgf11b	100149844	0	0
ENSDARG00000043904	pnrc1	100034521	22.623	35.3419	0.494023	0.18899	0.289281
ENSDARG00000043905	rnf14	415177	769.135	768.984	0.00943804	0.928599	0.952376
ENSDARG00000043902	gabrr1	568984	1.94972	0	-0.287253	0.262361
ENSDARG00000093079	PROC		0.888283	0	-0.151733	0.553878
ENSDARG00000093078	plscr3a	564882	0	1.44915	0.159755	0.460125
ENSDARG00000058508	CFAP70	564542	38.8216	26.809	-0.405997	0.352772	0.474001
ENSDARG00000062309	si:ch211-1f22.14		0	0
ENSDARG00000058502	olah	568096	109.262	101.109	-0.101794	0.627749	0.729711
ENSDARG00000058503	flt3	566708	0	3.77339	0.452008	0.0947259	0.163024
ENSDARG00000058504	ap1s2	327237	2144.58	1878.79	-0.19376	0.00199665	0.00534135
ENSDARG00000074892	pde6d	436981	323.5	394.141	0.268299	0.0560173	0.103969
ENSDARG00000074897	hes2.1	559147	0	0
ENSDARG00000096649	adgre19		0	0
ENSDARG00000096648	BX908780.6		0	0
ENSDARG00000096646	BX296520.1		0.888283	0	-0.151733	0.553878
ENSDARG00000002877	reps1	564535	2782.24	3100.31	0.152771	0.00740738	0.0174942
ENSDARG00000096644	adgre18		11.4684	3.77339	-0.73774	0.128241	0.209838
ENSDARG00000096643	BX908780.5		0	0
ENSDARG00000096642	AL954187.1		0	0.420006	0.0452687	0.838603
ENSDARG00000096641	BX649471.1		0	0
ENSDARG00000002872	zgc:113210	541387	829.76	617.498	-0.423935	2.12659e-06	8.83832e-06
ENSDARG00000059459	si:ch211-283h6.4	100001127	72.6025	104.253	0.506192	0.0336328	0.0670178
ENSDARG00000059455	dqx1	100002601	87.3687	72.6374	-0.23084	0.376234	0.497625
ENSDARG00000040455	unc50	393217	531.528	783.214	0.549107	8.85837e-06	3.40366e-05
ENSDARG00000061458	phf14	555505	1617.81	1424.71	-0.179794	0.0217614	0.0457564
ENSDARG00000061459	RAPGEF2	793952	3322.34	3522.17	0.0805014	0.229286	0.338312
ENSDARG00000040453	wdfy2	492636	253.278	604.715	1.21631	1.73963e-20	2.28929e-19
ENSDARG00000040452	fam214a	555595	828.5	1297.9	0.636632	2.54563e-10	1.5924e-09
ENSDARG00000061454	nrxn2a	558326	368.291	688.957	0.883481	3.28175e-14	2.85666e-13
ENSDARG00000061450	tesk2	568213	911.987	1035.37	0.174167	0.0583042	0.107733
ENSDARG00000061451	n4bp2	558048	1277.32	1917.52	0.572244	9.57559e-10	5.69292e-09
ENSDARG00000097518	BX537110.1		0	0
ENSDARG00000097519	AL935300.2		0	0
ENSDARG00000097514	CR854989.1		170.738	187.457	0.144208	0.422721	0.544011
ENSDARG00000097515	CR751227.1		0	0
ENSDARG00000097517	BX323016.1		0	0
ENSDARG00000097510	si:dkey-245f22.3	492819	6.29586	14.1659	0.555537	0.261254	0.375041
ENSDARG00000097511	BX890629.1		6.60322	15.7965	0.650439	0.184588	0.284077
ENSDARG00000097512	BX649529.1		38.6718	21.1651	-0.682058	0.0781446	0.138412
ENSDARG00000097513	CT573383.1		0	0
ENSDARG00000010373	CYSLTR2	563111	26.0881	28.5801	0.12312	0.743089	0.820606
ENSDARG00000010376	slc5a3a	100004287	0	2.54951	0.332076	0.202067	0.305304
ENSDARG00000094899	si:ch1073-143l10.2	565165	666.328	572.77	-0.203837	0.0917617	0.158775
ENSDARG00000094890	si:ch211-163b2.4	100003064	0	0
ENSDARG00000094892	cenph	567359	494.3	302.407	-0.700436	7.7673e-07	3.42638e-06
ENSDARG00000094894	tyrobp	100101461	1.35753	2.72671	0.18769	0.639885	0.739569
ENSDARG00000094896	rbm33b	556301	2642.87	1625.59	-0.698808	7.20115e-34	1.68938e-32
ENSDARG00000045801	fbxl14b	324835	67.7573	52.0669	-0.352122	0.188019	0.2882
ENSDARG00000069378	pard6a	792828	282.647	508.549	0.818336	1.62691e-08	8.57648e-08
ENSDARG00000045803	mfge8b	558580	42.8561	293.867	2.62568	4.72366e-32	1.0466e-30
ENSDARG00000057504	si:dkey-202g17.3	100003805	0.592189	0	-0.113212	0.633626
ENSDARG00000011777	cttn		3582.81	2574.29	-0.472842	4.09369e-21	5.58261e-20
ENSDARG00000011770	dhrs12	556393	723.415	1138.65	0.646378	6.68724e-16	6.54392e-15
ENSDARG00000022698	lad1	558327	17.9949	11.6621	-0.378806	0.405641	0.527023
ENSDARG00000101619	minos1	751699	774.833	701.437	-0.134456	0.171104	0.267035
ENSDARG00000022690	chic2	394095	1919.53	2089.07	0.118834	0.0683734	0.12359
ENSDARG00000013415	lmna	195815	859.461	758.102	-0.186948	0.0399422	0.0778371
ENSDARG00000013414	lin7a	393682	17.366	75.5148	1.82198	2.98977e-08	1.53309e-07
ENSDARG00000091936	si:ch211-135f11.5		0	0
ENSDARG00000091916	ugt5b2	791210	4.15118	6.77239	0.281507	0.555534	0.66925
ENSDARG00000091917	CU571079.1		0	0
ENSDARG00000091914	BX530075.1		0	0
ENSDARG00000091915			5.66473	2.04503	-0.421715	0.328122	0.448623
ENSDARG00000091912	si:ch211-15j1.5	100148489	1.18438	1.15932	-0.00460854	0.987027
ENSDARG00000091911	CR974461.1		0	0
ENSDARG00000091918	BX548073.6		8.7232	3.33717	-0.603948	0.217421	0.324339
ENSDARG00000094276	BX005156.2		0.296094	0.261671	-0.00750836	0.96807
ENSDARG00000094277	mrpl44	571210	1367.79	1234.03	-0.14892	0.161252	0.254457
ENSDARG00000094270	CR855393.2		0	0
ENSDARG00000094271	si:ch73-222f22.2		0	0
ENSDARG00000094272	map3k19		17.3358	7.45935	-0.640415	0.191938	0.293036
ENSDARG00000094273	si:dkey-3k20.4		133.707	50.4137	-1.31712	1.52345e-08	8.05064e-08
ENSDARG00000094279	si:dkeyp-20g2.3		53.7172	7.1374	-1.48202	0.00192259	0.0051616
ENSDARG00000088589	ponzr3	100004954	6.66	6.06124	-0.0469295	0.920751	0.947416
ENSDARG00000025478	gipr	101885360	1.48047	2.10003	0.0459467	0.8786	0.919144
ENSDARG00000078319	si:ch211-280c16.1	108182909	0	0
ENSDARG00000078318	tmod1	100149766	0	3.04602	0.573353	0.075812	0.134953
ENSDARG00000078315	zgc:110063	553772	374.865	342.235	-0.115423	0.465397	0.585363
ENSDARG00000078317	si:dkey-175m17.7	100007304	209.984	175.735	-0.246622	0.191404	0.292402
ENSDARG00000078311	dcaf6	564498	336.476	697.138	1.02272	2.50649e-19	3.09229e-18
ENSDARG00000078310	cecr2	799918	1459.81	2057.03	0.486821	9.00088e-09	4.86705e-08
ENSDARG00000078313	MYO9B	100332329	2400.8	2465.78	0.0342176	0.608625	0.713488
ENSDARG00000078312	pimr22		0	0
ENSDARG00000016213	RDH8	556557	0	0
ENSDARG00000091006	cobl	497312	15.8648	51.2152	1.3306	0.000661278	0.00193116
ENSDARG00000091001	mycbp		925.983	342.541	-1.40587	2.13136e-30	4.43097e-29
ENSDARG00000091003	il34	560193	11.6019	12.1665	0.0266458	0.954501	0.970019
ENSDARG00000091009	si:ch211-28p3.4	100536702	4.18317	1.30836	-0.27315	0.452213	0.573171
ENSDARG00000038754	plk3	334202	7057.27	4493.91	-0.652495	3.92365e-46	1.35587e-44
ENSDARG00000079043	si:dkeyp-75b4.10	100320899	32.0711	1.68002	-2.0132	3.49822e-05	0.000124182
ENSDARG00000079046	RABL6		346.047	441.897	0.342424	0.0052112	0.0128097
ENSDARG00000042485	foxd5	30524	0	0.579661	0.0976532	0.685301
ENSDARG00000079049	cercam	558337	0.703867	8.95315	0.631922	0.0795879	0.140548
ENSDARG00000098209	si:ch211-199b20.3	100150204	466.125	339.056	-0.459798	0.000311504	0.000961523
ENSDARG00000089181	adad1	564818	2266.8	1526.16	-0.565375	9.57838e-19	1.13719e-17
ENSDARG00000053979	bc2	798901	637.012	1109.21	0.787707	7.53977e-17	7.90039e-16
ENSDARG00000095639	BX248515.2		0	0
ENSDARG00000053973	fetub	569489	107.866	51.5458	-0.280523	0.510179	0.627829
ENSDARG00000018361	sult1st3	368270	12.1421	3.70884	-0.807734	0.0954452	0.164088
ENSDARG00000095636	cycsa		0	0
ENSDARG00000098203	APCDD1		0	0
ENSDARG00000088932	si:dkey-240e12.6	557168	15082.8	6263.21	-1.25912	2.61613e-64	1.44013e-62
ENSDARG00000095634	si:ch211-66k16.2	101886584	0.888283	4.17586	0.512767	0.220247	0.327604
ENSDARG00000095633	si:ch211-133l5.7	564121	4.65061	7.29838	0.291833	0.537731	0.652591
ENSDARG00000098204	CU984600.2		38.1469	43.9928	0.189343	0.566866	0.679196
ENSDARG00000062165	tub	568677	29.299	13.7647	-0.794762	0.0588054	0.108484
ENSDARG00000062164	atrn		1198.7	2101.03	0.803962	6.30308e-32	1.3871e-30
ENSDARG00000022905	znf1163		2.23454	2.94004	0.0481999	0.894933	0.929859
ENSDARG00000022904	skilb	100170835	30.9053	425.005	3.57145	4.74729e-59	2.34272e-57
ENSDARG00000098206	ptrh1		640.951	811.98	0.336297	0.00177744	0.00480426
ENSDARG00000062168	tmem168b	558640	1097.03	1064.02	-0.0412982	0.649465	0.747282
ENSDARG00000076657	plagl2	259255	0.703867	4.56903	0.625095	0.148528	0.237251
ENSDARG00000101414	CU302436.9		0	0
ENSDARG00000101417	FQ312024.2		0	0
ENSDARG00000101416	U1		0.296094	0.261671	-0.00750836	0.96807
ENSDARG00000101411	wbp11		2085.18	1325.99	-0.642891	5.15359e-14	4.39404e-13
ENSDARG00000101410	CT025695.1		0	0
ENSDARG00000101413	dusp7	327246	405.465	689.596	0.762234	6.18906e-12	4.40928e-11
ENSDARG00000101412	FP102969.1		0	0
ENSDARG00000101419	drp2	558055	15.5752	12.5358	-0.176758	0.719428	0.8031
ENSDARG00000101418	BX324179.1	108183430	0	0
ENSDARG00000038153	lgals2b	393486	1.2033	2.10003	0.0847826	0.7587	0.831362
ENSDARG00000038151	zgc:92360	436988	8.18411	15.6514	0.475946	0.332974	0.453385
ENSDARG00000038156	dusp11	550417	445.166	677.594	0.592642	2.19135e-08	1.14135e-07
ENSDARG00000103929	ildr1a	393364	2128.5	1205.94	-0.814227	8.01478e-41	2.35881e-39
ENSDARG00000038154	isca2	100150438	776.993	545.891	-0.5065	1.08336e-06	4.6911e-06
ENSDARG00000103927	CR450824.2		0	0
ENSDARG00000103926	inpp5e	606579	240.775	339.057	0.466754	0.00251541	0.00660979
ENSDARG00000038159	tcf7l1a	30523	1179.62	1042.78	-0.176002	0.0363219	0.0716466
ENSDARG00000103924	zgc:154055	556036	12.2869	19.9965	0.434547	0.351027	0.472046
ENSDARG00000103923	tfap4	100318080	194.691	403.906	1.00639	3.133e-11	2.11778e-10
ENSDARG00000103922	bod1		806.649	711.948	-0.16661	0.170048	0.265613
ENSDARG00000103921	CR847936.9		0	0
ENSDARG00000103920	U1		0.234622	0	-0.0595005	0.792136
ENSDARG00000099355	BX890548.1		0	0
ENSDARG00000099356	si:dkey-6f10.5		0	0
ENSDARG00000099357	U1		0	0
ENSDARG00000099350	si:ch211-283l16.1		0	0
ENSDARG00000099351	igfbp1a	317638	27.2754	101.58	1.67337	4.8291e-08	2.43097e-07
ENSDARG00000099352	si:rp71-62i8.1		4.34615	7.9612	0.314244	0.518816	0.635337
ENSDARG00000099353	slc25a13		6.99864	0.869491	-0.880109	0.0508535	0.0957946
ENSDARG00000042660	fam32a	431750	489.531	740.223	0.588974	2.61641e-07	1.21738e-06
ENSDARG00000099358	hccsb	58016	1452.43	1980.02	0.448831	3.18848e-09	1.7941e-08
ENSDARG00000099359	BX649497.2		0.234622	0.813173	0.0991901	0.727825
ENSDARG00000023053	fam129ab	561414	87.9304	115.243	0.353143	0.153233	0.243671
ENSDARG00000023058	foxo3a	494532	1313.34	2132.94	0.699272	5.02782e-21	6.80898e-20
ENSDARG00000096364	CR626864.4		0	0
ENSDARG00000096365	si:ch211-195m9.3	100332163	102.682	293.866	1.4769	4.56342e-19	5.52189e-18
ENSDARG00000096366	ighj2-3		0	0
ENSDARG00000096367	fnbp1b		4.44142	4.44842	-0.000206852	0.99953	0.999637
ENSDARG00000096362	si:ch211-229c8.14		0	0
ENSDARG00000096363	BX927298.1		0	0
ENSDARG00000096368	neu3.5	100000684	5.65347	12.2202	0.51023	0.301911	0.419754
ENSDARG00000096369	CT573133.2		0	0
ENSDARG00000007807	cyth3a	100002190	13.9358	36.3819	1.00066	0.0235618	0.0491141
ENSDARG00000090929	si:dkeyp-98a7.3	564145	3348.47	1652.5	-1.00814	1.02252e-36	2.63965e-35
ENSDARG00000052207	c3a.3	565074	10.2331	3.6634	-0.468743	0.304375	0.422451
ENSDARG00000026109	slc48a1b	792763	1687.71	1527.28	-0.144244	0.033472	0.0667596
ENSDARG00000055463	lrit3a	558559	633.648	770.993	0.277323	0.00210814	0.00561959
ENSDARG00000055467	si:dkeyp-3f10.14	100151233	0	0
ENSDARG00000055465			0.469245	0	-0.109564	0.674215
ENSDARG00000102335	ano1	407698	1419.73	1171.75	-0.275524	0.000726649	0.00210685
ENSDARG00000102334	si:ch211-124n19.2		117.062	248.673	1.05425	2.79431e-08	1.43728e-07
ENSDARG00000102336	SLC5A7		0	0
ENSDARG00000102330	U1		0	0
ENSDARG00000102333	fcf1		1334.97	1031.14	-0.366514	0.000139946	0.000456411
ENSDARG00000003251	zbtb22b	64809	1064.31	979.439	-0.118078	0.15157	0.24142
ENSDARG00000102339	si:dkey-5n7.2	796802	0.703867	0	-0.139354	0.595253
ENSDARG00000098874	exoc6b	767763	1858.19	1769.35	-0.0687188	0.235831	0.346147
ENSDARG00000003259	loxa	404621	1.87698	1.57003	-0.0314984	0.91947	0.946407
ENSDARG00000077609	elfn2a		9.12151	4.80254	-0.524873	0.282215	0.398188
ENSDARG00000036888	zgc:153935	777611	405.517	545.992	0.413875	0.000238477	0.000751059
ENSDARG00000095949	si:dkey-22i16.9	100536567	0	0
ENSDARG00000077605	FRRS1	557898	396.559	442.537	0.160293	0.195678	0.297374
ENSDARG00000053155	alg3	553725	2220.58	1939.12	-0.188784	0.0580605	0.107303
ENSDARG00000053152	pcmtd1	327176	785.959	760.905	-0.0501379	0.660759	0.75729
ENSDARG00000053158	prss56		0.592189	3.20435	0.468056	0.237869	0.348145
ENSDARG00000053159	zgc:110626	550588	3.23451	7.05689	0.323575	0.476733	0.596168
ENSDARG00000095940	si:dkey-19a16.12		0	1.73898	0.169941	0.419912
ENSDARG00000026811	extl3	493783	262.962	565.266	1.06686	5.52255e-16	5.44234e-15
ENSDARG00000060152	fam155b	791161	23.1915	82.0348	1.61568	9.81523e-08	4.77851e-07
ENSDARG00000060153	h6pd	569348	90.1616	208.108	1.15986	2.95716e-09	1.6702e-08
ENSDARG00000060150	psmd11a	503934	4052	3501.21	-0.207217	0.00063688	0.00186623
ENSDARG00000005948	ankmy2a	334389	964.601	1396.08	0.531303	4.11063e-13	3.23129e-12
ENSDARG00000005941	yes1	407620	2852.5	2391.18	-0.255423	6.97479e-07	3.09917e-06
ENSDARG00000005942	v2rl1	566039	4.70371	7.25136	0.228127	0.642431	0.741547
ENSDARG00000005943	htra4	100334257	61.6385	64.922	0.050638	0.851618	0.900218
ENSDARG00000005945	sart1	436946	4066.41	4017.7	-0.014984	0.767107	0.838132
ENSDARG00000084859	5S_rRNA		0	0
ENSDARG00000084858	5S_rRNA		0	0
ENSDARG00000084853	5S_rRNA		0	0
ENSDARG00000084856	5S_rRNA		0	0
ENSDARG00000102809	si:ch211-106g8.2		0	0
ENSDARG00000102808	calr3b	321315	4054.82	3724.21	-0.124895	0.0393359	0.0768164
ENSDARG00000058874	zgc:113227	541506	155.501	174.189	0.171956	0.447081	0.568287
ENSDARG00000102803	CABZ01087091.1		0	0.420006	0.0452687	0.838603
ENSDARG00000102802	brdt	333996	5946.33	4243.09	-0.487362	1.10819e-21	1.55243e-20
ENSDARG00000102801	U6		0	0
ENSDARG00000102807	CU041319.1		23.3967	16.3479	-0.269337	0.581603	0.692185
ENSDARG00000102806	zgc:112234	554097	12.5895	5.41036	-0.731275	0.12525	0.205996
ENSDARG00000102805	cyp2aa12	555510	0	0
ENSDARG00000102804	znf1021		0	0.869491	0.132297	0.583103
ENSDARG00000068387	slc6a18	100141332	0	0
ENSDARG00000068382	pglyrp5	553387	1.65362	3.25269	0.218422	0.603568	0.709299
ENSDARG00000068380	foxg1c	571323	0.938489	4.1934	0.352652	0.339606	0.460107
ENSDARG00000038900	acadm	406283	11344.1	10214	-0.149348	0.000236219	0.000744068
ENSDARG00000038901	tmem256	550283	898.783	923.314	0.0478054	0.634916	0.735828
ENSDARG00000038905	hectd3	563189	3246.01	2679.12	-0.273125	2.38323e-06	9.83383e-06
ENSDARG00000070526	zc2hc1c	799591	7.13105	6.67038	-0.0436783	0.927954	0.952038
ENSDARG00000038909	msl2a	564400	334.682	690.686	1.02645	1.32801e-17	1.47287e-16
ENSDARG00000070522	cacna1i	566351	458.424	438.447	-0.0705363	0.564506	0.677283
ENSDARG00000052782	glrba	83412	0	0
ENSDARG00000052783	cdc42ep3	447829	2.71506	1.30836	-0.174568	0.6343	0.735375
ENSDARG00000052787	zdhhc12b	569129	31.0141	26.2108	-0.170517	0.710682	0.796521
ENSDARG00000052789	azin1a	550230	464.197	245.937	-0.876733	2.57716e-07	1.20083e-06
ENSDARG00000024522	prf1.6	795573	0	0
ENSDARG00000063719	usp8	565434	2765.95	1920.82	-0.526106	2.30413e-21	3.19342e-20
ENSDARG00000063718	vps72	100001285	762.772	1034.02	0.43984	1.58743e-07	7.58272e-07
ENSDARG00000063711	trim3a	562489	462.126	555.662	0.265506	0.013697	0.0302894
ENSDARG00000063713	syngap1a	100034485	181.057	43.9067	-1.87221	9.56171e-12	6.73837e-11
ENSDARG00000100409	camlg	404622	687.847	705.866	0.0367022	0.736065	0.815407
ENSDARG00000100408	FQ377628.1	103910042	0.592189	0	-0.113212	0.633626
ENSDARG00000100405	BX957252.3		0	0
ENSDARG00000100407	si:ch211-166e11.5	100334858	711.459	950.289	0.419659	3.19432e-06	1.29563e-05
ENSDARG00000100406	ITIH4	100003906	17.9382	6.42625	-0.942449	0.0456409	0.0873398
ENSDARG00000100400	FO704610.1		117.845	566.12	2.15821	4.41521e-32	9.80478e-31
ENSDARG00000100403	CT027704.1		0	11.2583	1.66262	0.000154226	0.000499234
ENSDARG00000100402	fgd1	560305	144.678	218.628	0.552263	0.00579731	0.0140927
ENSDARG00000104319	AL954832.1		0	0
ENSDARG00000104318	si:dkey-9i5.2		0.938489	0	-0.156085	0.536141
ENSDARG00000104315	fhl3b	555053	1.87698	9.34209	0.748886	0.110425	0.185452
ENSDARG00000104314	nrg1	796461	1575.69	613.341	-1.3547	3.30309e-45	1.11484e-43
ENSDARG00000104317	si:busm1-160c18.1	795595	0	0
ENSDARG00000104311	scmh1	100037329	182.766	146.748	-0.315988	0.0977085	0.167317
ENSDARG00000104310	U3		0.601652	0	-0.0595005	0.782557
ENSDARG00000104313	FP102889.1		0	0
ENSDARG00000104312	POU2AF1	103908823	0	0
ENSDARG00000034138	shisa2a	561042	658.819	551.378	-0.251663	0.0112548	0.0254502
ENSDARG00000083852	5S_rRNA		0	0
ENSDARG00000083857	5S_rRNA		0	0
ENSDARG00000087779	pum3	553068	2968.13	2365.13	-0.322668	2.09569e-09	1.20559e-08
ENSDARG00000087778	U5		0	0
ENSDARG00000085358	SNORD46		0	0.261671	0.0452687	0.838603
ENSDARG00000081987	dre-mir-457a		0	0
ENSDARG00000043299	nmu	407657	0.703867	0	-0.139354	0.595253
ENSDARG00000082187	dre-mir-21-1		1.06143	4.27656	0.491968	0.258409	0.371693
ENSDARG00000082182	CT027552.1		0	0
ENSDARG00000032990	plxnb3	566546	173.083	200.178	0.191154	0.297473	0.414638
ENSDARG00000032993	ccl34b.3		25.4239	17.4308	-0.393001	0.347137	0.46791
ENSDARG00000032997	rnf185	406310	1443.43	1194.61	-0.265832	0.0040192	0.0101137
ENSDARG00000081781	dre-mir-155		0	0
ENSDARG00000063129	si:ch211-38m6.7	101885585	0	0
ENSDARG00000062442	meiob		1.64236	3.92507	0.155785	0.634618	0.735616
ENSDARG00000069411	cx34.5	565892	46.4427	625.319	3.58691	2.19906e-75	1.5239e-73
ENSDARG00000030591	lrrc42	326793	1398.87	1137.33	-0.294377	0.000129184	0.000423363
ENSDARG00000062446	neurl2	560768	0.469245	0	-0.109564	0.674215
ENSDARG00000069415	col17a1a	557257	2.73398	3.94235	0.205889	0.662365	0.758552
ENSDARG00000062445	pias1b	562982	927.283	873.866	-0.0868799	0.330266	0.450954
ENSDARG00000062448	skor1b	567457	15.4796	6.91345	-0.53491	0.272946	0.388202
ENSDARG00000030598	nampta	100330160	24.1424	156.135	2.37962	5.64891e-17	5.98974e-16
ENSDARG00000078773	tmem70	100002535	2242.18	1889.6	-0.244681	0.000172489	0.000554496
ENSDARG00000033647	smarcb1a	799716	2032.29	1827.43	-0.153346	0.0140115	0.0308939
ENSDARG00000101752	PLEKHG5	796404	789.321	1007.55	0.336983	0.0205585	0.0434281
ENSDARG00000101753	CABZ01085195.1		0	0
ENSDARG00000006990	creld1b	569741	192.353	171.069	-0.174846	0.362949	0.484047
ENSDARG00000101751	si:ch211-133h13.1		1.80495	0	-0.171833	0.402973
ENSDARG00000101756	im:7141269	492560	326.074	292.008	-0.159538	0.340295	0.460753
ENSDARG00000101757	si:dkey-27n6.4		0	0
ENSDARG00000101755	prkar1ab	550427	392.822	299.696	-0.380849	0.015003	0.0328097
ENSDARG00000101758	si:dkey-161l11.24		0	0
ENSDARG00000101759	homer1b	436769	0	17.3798	1.96441	1.65353e-05	6.11878e-05
ENSDARG00000105042	cldn10l2	553386	0	0
ENSDARG00000105043	si:dkey-152b24.6	100002310	23770.3	8175.63	-1.53624	0	0
ENSDARG00000105040	fam69c		0.703867	0	-0.139354	0.595253
ENSDARG00000105041	CABZ01024659.1		0	0
ENSDARG00000105046	ccnf	266981	1515.2	2970.11	0.969366	1.44852e-55	6.33265e-54
ENSDARG00000105047	BX927369.1		0	0
ENSDARG00000105044	si:ch211-51i16.3	108182772	0	0
ENSDARG00000105045	bmpr1ab	447846	359.826	412.711	0.202305	0.0984165	0.168367
ENSDARG00000105048	CABZ01084447.1	101885590	0	3.0997	0.371103	0.15239	0.242529
ENSDARG00000042527	unga	393949	1752.52	1452.02	-0.26717	0.000380209	0.00115499
ENSDARG00000042526	sebox	282666	0	1.68002	0.165741	0.432193
ENSDARG00000042525	ebf2	30692	1.40773	2.20337	0.0781091	0.824188	0.880687
ENSDARG00000042522	katnbl1	325430	2917.88	2542.99	-0.197579	5.52715e-05	0.00019107
ENSDARG00000042521	si:dkey-251i10.1	100038774	1.40773	0.785014	-0.0762815	0.785813
ENSDARG00000042520	UTP14C	553498	3570.76	3509.2	-0.0234687	0.6802	0.772863
ENSDARG00000100221	BX511018.2		0	0
ENSDARG00000042529	gnat2	140429	1.82677	3.33585	0.239975	0.604301	0.710075
ENSDARG00000059923	slc25a47a	724009	46.3045	30.5838	-0.536962	0.117528	0.195316
ENSDARG00000059925	usp24	325631	2756.02	2032.5	-0.44081	1.93053e-09	1.11386e-08
ENSDARG00000100636	rbm12	445379	1232.07	999.363	-0.300499	0.00804678	0.0188346
ENSDARG00000008936	sec11a	436794	1588.92	1688.24	0.0917259	0.278892	0.394621
ENSDARG00000100634	BX324132.7	796099	0	0
ENSDARG00000078770	si:ch73-21k16.5	336430	0	0.579661	0.0976532	0.685301
ENSDARG00000067806	zgc:158432	555281	118.63	130.673	0.144336	0.518086	0.634761
ENSDARG00000082727	5S_rRNA		0	0
ENSDARG00000100632	BX649328.1		0	0
ENSDARG00000035770	ube2c	566441	2738.89	2484.04	-0.136661	0.0692276	0.12479
ENSDARG00000035771	MEPCE	100151157	7720.71	5727.48	-0.428617	6.21471e-22	8.80695e-21
ENSDARG00000035776	n6amt1	436775	419.951	383.694	-0.121935	0.376184	0.497625
ENSDARG00000000861	scrib	368473	3264.14	2714.9	-0.267467	0.000108763	0.000360428
ENSDARG00000104933	FQ377903.3		1359.46	1143.78	-0.242506	0.00605659	0.014661
ENSDARG00000094078	CR626882.1		0	0
ENSDARG00000104932	si:ch211-261d9.1		0	0
ENSDARG00000100149	axin2	58080	1385.32	1924.21	0.466177	8.22938e-09	4.47091e-08
ENSDARG00000104935	CU104716.4	559538	0.296094	0.681677	0.0505042	0.816064
ENSDARG00000094070	AL954149.1		2.77653	1.65451	-0.174701	0.67493	0.768394
ENSDARG00000000906	skap2	368564	321.953	373.982	0.223959	0.112841	0.188813
ENSDARG00000094074	si:dkey-81h8.1	100034657	0	1.04669	0.142437	0.535018
ENSDARG00000094075	BX936317.1		107.674	94.3263	-0.173098	0.461592	0.581889
ENSDARG00000074414	sema4ba	572261	3.66481	29.5129	1.75261	0.000291849	0.000905856
ENSDARG00000074415	zgc:171482	796610	0.469245	0	-0.109564	0.674215
ENSDARG00000074410	brip1	794038	2227.59	1801.67	-0.301774	5.53451e-06	2.18407e-05
ENSDARG00000083272	dre-mir-217		0	0
ENSDARG00000074419	hcn4l	556759	5.24461	5.07483	0.00635193	0.989477	0.993596
ENSDARG00000031647	stat2	565200	51.0886	84.8566	0.648451	0.0150925	0.0329871
ENSDARG00000031649	sst3	751721	0	0
ENSDARG00000070571	zgc:153953	563192	5.06128	17.3301	0.942527	0.0543812	0.101337
ENSDARG00000077855	znrf2a	100124611	884.096	1272.67	0.530237	2.72782e-07	1.2671e-06
ENSDARG00000077853	ttll2	799958	1.99992	3.7277	0.252213	0.589842	0.698545
ENSDARG00000077852	samd11	569122	7.35621	18.778	0.92993	0.0395939	0.0772586
ENSDARG00000077850	lgals3a		1446.72	993.584	-0.536883	1.08141e-05	4.0987e-05
ENSDARG00000077859	ndufaf4	794169	701.699	513.412	-0.441149	0.00014131	0.000460632
ENSDARG00000077858	asip1	798574	0	1.26002	0.148901	0.499211
ENSDARG00000070570	ppp4ca	100003080	5438.2	4454.13	-0.287229	1.0138e-11	7.12907e-11
ENSDARG00000103029	U6		0	0.420006	0.0452687	0.838603
ENSDARG00000089529	desi1b	793871	353.743	370.453	0.0754544	0.558746	0.671981
ENSDARG00000089525	si:ch211-250e5.9	798039	3628.46	1694.21	-1.09244	1.65595e-83	1.354e-81
ENSDARG00000091249	CR381686.1		21.0563	6.65976	-1.02878	0.0293764	0.0595389
ENSDARG00000091243	znf975		0	0
ENSDARG00000091240	SNORD53_SNORD92		0	0
ENSDARG00000091241	glt1d1		25.7222	20.0326	-0.296306	0.445375	0.566708
ENSDARG00000091247	fars2	793097	319.837	244.337	-0.359553	0.0358579	0.0708744
ENSDARG00000051809	btr12	767681	136.974	367.431	1.00416	0.0238896	0.0497073
ENSDARG00000051800	fnbp4	403074	2044.15	1682.46	-0.282977	3.45341e-05	0.000122681
ENSDARG00000051804	BX664721.1		0	0
ENSDARG00000051805	CU469568.1		2.2742	0.579661	-0.23007	0.466914	0.58678
ENSDARG00000092919	zp3c	563179	15289.8	9061.37	-0.751343	1.4363e-55	6.29329e-54
ENSDARG00000092918	AL590151.2		0	0.785014	0.127355	0.606835
ENSDARG00000043735	si:dkey-88n24.5	572610	0	5.41834	0.574895	0.0402245	0.0783014
ENSDARG00000092916	mlnl	100333520	7.89349	6.17651	-0.106482	0.820682	0.877772
ENSDARG00000043736	si:ch211-282j17.8	557707	0	0
ENSDARG00000092913	BX547930.1		0	0
ENSDARG00000092912	BX323586.2		46.7006	39.2883	-0.215421	0.548646	0.662876
ENSDARG00000092911	pimr44		0	0
ENSDARG00000043732	cops4	325592	1377.17	1176.01	-0.218919	0.0161743	0.0350652
ENSDARG00000002219	si:dkey-103j14.5	570552	0	0
ENSDARG00000032206	cthl	445818	47.7333	32.2555	-0.487853	0.18732	0.287265
ENSDARG00000015901	ptbp2b	562434	252.64	198.036	-0.344447	0.0289549	0.0587821
ENSDARG00000002217	scocb	791709	343.621	262.179	-0.378057	0.00707896	0.0168171
ENSDARG00000015902	stat6		238.841	168.511	-0.487871	0.00323679	0.00831186
ENSDARG00000015905	lztr1	792832	4720.4	4423.95	-0.0918156	0.0511448	0.0962548
ENSDARG00000002210	stk25a	449653	69.0912	216.505	1.57541	2.02442e-14	1.78929e-13
ENSDARG00000015907	dcbld1	664747	478.102	868.127	0.839302	3.05754e-14	2.67101e-13
ENSDARG00000015906	mxtx2	58078	0	1.26002	0.148901	0.499211
ENSDARG00000095038	CR388189.2		0	0
ENSDARG00000091794	U6		0	0
ENSDARG00000095034	zgc:162928	557144	212.553	431.29	1.002	3.83576e-13	3.01887e-12
ENSDARG00000091796	taar18c	100330826	0	0
ENSDARG00000091790	si:ch211-203b20.4	100004085	0	0
ENSDARG00000044968	vcla	552980	446.295	842.205	0.91549	3.89022e-14	3.35938e-13
ENSDARG00000091792	akap12a	101885554	3.5306	12.0714	0.829574	0.094674	0.162984
ENSDARG00000091793	si:cabz01071911.4	103910265	134.456	130.464	-0.0456923	0.816947	0.874974
ENSDARG00000040274	scamp5b	100004357	2.35749	1.15932	-0.164481	0.645221	0.743756
ENSDARG00000040277	fbxo32	393891	3575.05	2757.64	-0.372585	4.91665e-15	4.51297e-14
ENSDARG00000040278	klhl38b	563341	2.24581	2.70917	0.0426395	0.917378	0.94499
ENSDARG00000088699	pdzd8	561279	450.948	663.266	0.539615	6.80845e-07	3.03422e-06
ENSDARG00000088693	dcst2	556296	3.51933	8.70315	0.286841	0.484963	0.603928
ENSDARG00000088690	ddias	497565	85.8075	133.51	0.566886	0.0294261	0.0596273
ENSDARG00000088694	U6		0	0
ENSDARG00000100303	CU638714.1		1.42846	1.23318	-0.0360872	0.92912	0.952417
ENSDARG00000042063	si:ch211-145c1.1	563686	7994.02	3484.14	-1.19384	6.70618e-131	9.42822e-129
ENSDARG00000088349	U5		0	0
ENSDARG00000042065	eef2a.2	568904	204.599	164.562	-0.299878	0.0769327	0.136563
ENSDARG00000088347	sp1	324109	2293.03	1535.98	-0.56886	3.25263e-11	2.19409e-10
ENSDARG00000088346	miip	560634	81.0573	90.0269	0.143674	0.56991	0.681757
ENSDARG00000088341	U6		0.296094	0	-0.0595005	0.782557
ENSDARG00000091521	MAP3K11		233.766	313.39	0.415586	0.00227409	0.0060266
ENSDARG00000098586	zgc:194887	571819	13.6794	3.36005	-0.68379	0.122638	0.202432
ENSDARG00000088342	tmem145	557826	8.38745	51.2109	1.95655	1.90867e-06	7.98185e-06
ENSDARG00000091526	U6		0	0
ENSDARG00000079455	nlgn4a	561122	0	0.785014	0.127355	0.606835
ENSDARG00000079457	si:dkey-57h18.1		561.622	844.189	0.575554	7.41994e-10	4.4465e-09
ENSDARG00000079456	si:ch211-149a19.3	568118	11.092	4.84956	-0.623991	0.203561	0.307181
ENSDARG00000091525	zgc:173552	794406	29.5762	11.3388	-1.04889	0.013632	0.0301559
ENSDARG00000079453	atp8b4	559291	1.17311	1.15932	-0.00635604	0.982332
ENSDARG00000079452	rbm46		723.82	471.633	-0.617257	6.79793e-10	4.0888e-09
ENSDARG00000091524	znf1031		0	0
ENSDARG00000079459	pimr126	570633	0	0
ENSDARG00000044381	siah2l	378728	1175.74	1690.44	0.526902	4.89152e-12	3.52081e-11
ENSDARG00000044380	rbmx2	553240	548.062	1105.59	1.00326	8.50531e-21	1.13921e-19
ENSDARG00000011113	chrna10a	556507	1.40773	1.73898	0.0267407	0.930138	0.952869
ENSDARG00000044387	cldn2	562525	0	4.44842	0.325015	0.133914	0.217625
ENSDARG00000093796	itln2		0	2.10003	0.190694	0.367621
ENSDARG00000093797	BX005254.1		247.77	204.867	-0.259261	0.100503	0.171367
ENSDARG00000093794	si:rp71-79p20.2		10.008	0.869491	-1.16697	0.013125	0.0291663
ENSDARG00000093790	BX957348.1		0	0
ENSDARG00000045383	gpr22b	100150048	1.77657	0.785014	-0.108335	0.702771	0.790738
ENSDARG00000093798	slx4		5.95902	14.4265	0.692357	0.156662	0.248251
ENSDARG00000093799	setbp1	796785	4.35741	16.5249	0.962039	0.0508673	0.0958026
ENSDARG00000058207	abi2a	767646	209.307	503.611	1.24661	3.50738e-19	4.2865e-18
ENSDARG00000058206	si:ch211-153b23.5	321177	20.1055	12.4928	-0.408921	0.372997	0.494382
ENSDARG00000092269	si:dkeyp-41f9.4	100004079	0	0
ENSDARG00000058200	plcxd2	559936	0	0
ENSDARG00000058203	smc1al	403060	4337.75	5071.57	0.224662	1.45001e-05	5.40352e-05
ENSDARG00000058202	pex16	573990	216.281	442.65	1.00153	9.03817e-14	7.48801e-13
ENSDARG00000016769	sgtb	431772	197.705	299.507	0.574169	0.000142625	0.000464247
ENSDARG00000092267	CR788230.1		0	0
ENSDARG00000092266	si:ch73-27e22.2		2.07266	3.57866	0.129997	0.72727	0.808809
ENSDARG00000058208	slc25a26	560478	341.691	345.749	0.00256966	0.985677	0.990798
ENSDARG00000092263	CR382296.1		3.05009	15.5965	0.819433	0.0810424	0.142752
ENSDARG00000092262	si:ch211-220m6.4		0	0
ENSDARG00000041602	MMADHC	436726	803.207	584.565	-0.446792	2.36955e-06	9.77947e-06
ENSDARG00000041600	wdr83	436702	851.291	1023.34	0.266145	0.00120177	0.0033502
ENSDARG00000041607	eif4ebp3l	324490	2244.13	1636.39	-0.448051	2.19188e-09	1.25612e-08
ENSDARG00000041609	adarb1a	58134	3.77649	48.5822	2.51507	2.98182e-08	1.52942e-07
ENSDARG00000044039	stx11a	405846	1080.24	1183.06	0.136159	0.172211	0.26854
ENSDARG00000044038	zbtb2a	393129	2295.51	1718.33	-0.414344	5.17432e-12	3.71752e-11
ENSDARG00000096562	wu:fj29h11	335618	2918.51	2990.66	0.0316035	0.673043	0.766961
ENSDARG00000096563	BX322603.1		0	0
ENSDARG00000014690	rps4x	449547	8123.77	4417.12	-0.874867	3.62849e-67	2.16844e-65
ENSDARG00000096566	zgc:165656		94.5288	126.327	0.361887	0.163629	0.257458
ENSDARG00000096567	si:ch211-155o21.4		0	0
ENSDARG00000096564	CU915827.1		0.703867	1.26002	0.0561126	0.843799
ENSDARG00000096565	CR392024.1		72.163	92.1842	0.296221	0.31221	0.43109
ENSDARG00000019342	chrnd	404273	0	0
ENSDARG00000019341	gpc1a	553367	0	0
ENSDARG00000099628	CR855307.1		917.655	558.856	-0.706329	4.68306e-12	3.37948e-11
ENSDARG00000019345	mark3a	334300	1923.78	2288.85	0.24421	0.000522221	0.00155071
ENSDARG00000099624	chmp1b	336426	1073.84	1206.88	0.16024	0.0495387	0.0936796
ENSDARG00000099625			0	0.579661	0.0976532	0.685301
ENSDARG00000099626	BX908721.1		0	0
ENSDARG00000099627	CU467622.1		1.13237	0.971508	-0.0291521	0.938525
ENSDARG00000099620	CABZ01052747.1	100329676	0	0
ENSDARG00000099621	si:ch211-69b22.5		9.40814	10.0102	0.0448301	0.927036	0.951688
ENSDARG00000099623	gpr34l	446120	0	0
ENSDARG00000100304	chdh	100331020	3.59207	7.92374	0.46508	0.346233	0.466949
ENSDARG00000055659	gpr161	368421	574.076	952.561	0.727624	1.16335e-16	1.20096e-15
ENSDARG00000098583	wbp1	402930	850.746	676.028	-0.327175	0.000103232	0.000343145
ENSDARG00000007449	slc25a39	393458	3609.87	3870.21	0.101189	0.0640792	0.116846
ENSDARG00000039034	marcksl1a	406407	109.446	194.099	0.779278	0.000382269	0.0011598
ENSDARG00000025920	tiam1b	100330358	3.90709	12.8227	0.869857	0.0766416	0.136171
ENSDARG00000037153	atp6ap1b	195824	745.815	980.673	0.401983	2.94055e-05	0.000105361
ENSDARG00000059558	tecta	561355	10.3975	3.65384	-0.781586	0.110219	0.185265
ENSDARG00000055656	pdzd3b	566852	31.1079	5.65449	-1.61789	0.000505534	0.00150299
ENSDARG00000059553	sympk	570858	3069.43	2306.8	-0.413852	5.45518e-15	4.9979e-14
ENSDARG00000059556	recql5	566553	2049.76	1453	-0.48897	6.22087e-12	4.42872e-11
ENSDARG00000059557	xylt2	563446	188.312	109.759	-0.745769	0.00025374	0.000795058
ENSDARG00000093132			0	0
ENSDARG00000051785	dhx33	796505	354.469	464.181	0.374411	0.00159753	0.00435349
ENSDARG00000093131	si:ch211-57f7.7	101883039	0.938489	1.8317	0.0895885	0.761564	0.833659
ENSDARG00000051783	rplp0	58101	18046.2	9995.71	-0.84797	8.73362e-48	3.14894e-46
ENSDARG00000093137	BX294189.1		0	0
ENSDARG00000093134	CR388165.2		0.938489	1.26002	0.0257488	0.925613
ENSDARG00000093135	si:dkey-117n7.2		32.755	20.3345	-0.529854	0.229013	0.337968
ENSDARG00000023445	atp2b3b	558525	6.26458	7.68331	0.123288	0.801972	0.864813
ENSDARG00000015128	rpl27	325618	5032.4	3022.74	-0.72841	4.92764e-28	9.18854e-27
ENSDARG00000023443	tjp2b	436639	879.789	1156.43	0.379173	0.0146955	0.0322059
ENSDARG00000015123	dnase1l4.1	445317	3.39711	1.7095	-0.271289	0.530312	0.645651
ENSDARG00000023448	galnt14	562739	13.3265	40.6317	1.26542	0.00108661	0.00305446
ENSDARG00000056065	mov10b.2	555950	1.48047	0	-0.174812	0.434872
ENSDARG00000056062	adgre14		19.5958	10.2211	-0.543648	0.257625	0.370866
ENSDARG00000061177	mov10b.1	556024	23.7808	86.8953	1.68504	1.23406e-07	5.95015e-07
ENSDARG00000061174	znf740b	767693	678.542	751.739	0.15475	0.140369	0.226364
ENSDARG00000061173	st14a	678603	4277.82	3889.67	-0.13932	0.00734268	0.0173591
ENSDARG00000057334	cmasa	561018	306.115	616.997	0.957732	8.62053e-07	3.77888e-06
ENSDARG00000021352	gria1a	798689	82.6112	72.2549	-0.155719	0.571537	0.683244
ENSDARG00000021351	nefma	553718	9.09203	1.68266	-0.950745	0.0490227	0.0928116
ENSDARG00000022718	casp8ap2	541521	1343.66	2427.73	0.839959	2.97429e-16	2.99144e-15
ENSDARG00000045811	lrtm2b	101887010	0	0
ENSDARG00000045814	samm50	393111	1326.16	1397.49	0.0806103	0.277129	0.392752
ENSDARG00000045815	mcm10	553396	3357.49	2933.87	-0.195847	3.01333e-05	0.000107851
ENSDARG00000022712	stat3	30767	473.98	373.373	-0.346077	0.00782276	0.0183675
ENSDARG00000029124	adamts15a	569571	6.77348	19.771	0.940007	0.0480406	0.0912796
ENSDARG00000098123	GNG12	100331581	17.7141	32.9252	0.701461	0.0673509	0.122003
ENSDARG00000020405	napab	327082	1213.06	1400.13	0.200523	0.0143985	0.0316224
ENSDARG00000055868	rsl1d1	563247	2437.87	2633.57	0.106174	0.206831	0.311466
ENSDARG00000098346	U6		0	0
ENSDARG00000098129	si:dkeyp-97a10.2	100005159	36.2692	2.46768	-2.47305	3.05564e-07	1.411e-06
ENSDARG00000011926	tpgs2	431755	116.079	43.691	-1.2986	3.54165e-07	1.62773e-06
ENSDARG00000011925	spns1	799873	1472.6	2040.59	0.469177	7.31895e-14	6.13586e-13
ENSDARG00000011921	txnl1	394113	1428.92	1344.43	-0.0838656	0.216119	0.322717
ENSDARG00000011929	plp1b	368234	0	0
ENSDARG00000053547	jakmip2	559839	3.88817	1.15932	-0.319321	0.392906	0.514588
ENSDARG00000053544	hspa4l	562019	13.3425	3.88603	-0.971423	0.0446198	0.0856963
ENSDARG00000053542	kctd12.2	553403	12.2549	11.0837	-0.103083	0.834049	0.887793
ENSDARG00000018750	NPR1	555911	2.34622	4.93536	0.207984	0.602121	0.708199
ENSDARG00000028659	ms4a17c.2		0	0
ENSDARG00000079317	DLC1	567965	68.3313	262.869	1.74345	7.53961e-11	4.9426e-10
ENSDARG00000095956	CU467655.1		0	0
ENSDARG00000095954	BX571828.2		0	0
ENSDARG00000095955	BX927257.1		0.938489	4.83868	0.398261	0.283599	0.399718
ENSDARG00000095952	CR352226.7		0	0
ENSDARG00000095953	si:ch211-57m13.6		0.703867	0.785014	0.00438437	0.987477
ENSDARG00000095950	BX465868.1		0	0
ENSDARG00000095951	BX890562.2		22.2105	28.0114	0.293763	0.434597	0.555854
ENSDARG00000079315	lpxn	560743	7.07247	3.77339	-0.295727	0.513759	0.630923
ENSDARG00000098341	BX855613.1		0	0
ENSDARG00000063153	bcl11ab	566491	8.88797	47.9165	1.61652	0.000351026	0.00107368
ENSDARG00000026762	fam126a	402926	414.378	616.653	0.549253	0.000176285	0.000566232
ENSDARG00000063150	nrxn2b		169.674	59.5918	-1.41536	9.04104e-09	4.88606e-08
ENSDARG00000063157	mapk8ip2	561262	0	0
ENSDARG00000026766	bcl2l10	373113	3881.1	2919.12	-0.408788	2.1219e-09	1.21816e-08
ENSDARG00000063155	dcaf12	570671	691.457	1872.93	1.41423	2.34843e-52	9.58101e-51
ENSDARG00000026764	ahsg1	569558	11.1309	10.3835	-0.0591953	0.903138	0.935598
ENSDARG00000076270	adamts13	100320289	0	0
ENSDARG00000076272	znf1041	565096	1.18438	0.785014	-0.0487886	0.857787
ENSDARG00000063158	CABZ01081780.1	571043	1.40773	0	-0.174288	0.443275
ENSDARG00000076274	tnfsf14	798119	2.59211	7.81908	0.640908	0.193084	0.294348
ENSDARG00000076277	CR385050.1		4.82557	5.61439	0.136336	0.778712	0.847446
ENSDARG00000025150	si:dkey-181c13.1		0	0
ENSDARG00000100643	CU855924.1		0	0
ENSDARG00000067817	PRKAB2		341.801	225.942	-0.581645	3.12368e-05	0.000111584
ENSDARG00000100641	snoU2_19		3.63173	0.420006	-0.62482	0.0837306	0.14679
ENSDARG00000100640	BX321870.2		0	0.813173	0.129351	0.598679
ENSDARG00000100647	si:dkey-211i20.4		0	0
ENSDARG00000028386	htatip2	64605	226.781	330.436	0.519884	0.000261059	0.000815735
ENSDARG00000100645	BX321887.2		0	0
ENSDARG00000100644	BX005284.1		0.530717	1.26134	0.170328	0.654032
ENSDARG00000100649	tlr1	403127	0.592189	0.579661	-0.0109861	0.968692
ENSDARG00000056888	dnah5l	335340	48.5052	35.9391	-0.402395	0.219565	0.326788
ENSDARG00000056885	per1a	563926	10.7639	11.0622	-0.00342185	0.994228	0.996625
ENSDARG00000056886	tbccd1	100037389	999.639	1096.19	0.135292	0.0898242	0.155809
ENSDARG00000003877	pbrm1	565366	689.475	240.876	-1.49899	5.18963e-28	9.65865e-27
ENSDARG00000003872	ccdc102a	325319	2619.09	2463.55	-0.0922263	0.102086	0.17359
ENSDARG00000026499	ppm1e	553417	0	6.75485	1.06251	0.00441002	0.0110022
ENSDARG00000069058	lgals9l4	556717	0	0
ENSDARG00000019808	evpla	373136	0	0
ENSDARG00000054010	scaf1	553490	3719.77	4059.43	0.122489	0.0139567	0.0307871
ENSDARG00000062280	hace1	572430	328.274	578.734	0.796013	9.45572e-09	5.10452e-08
ENSDARG00000037122	TENM2	563197	470.478	681.613	0.528253	9.98606e-06	3.81073e-05
ENSDARG00000037121	mat2ab	791612	26.7138	26.6924	-0.0342643	0.932789	0.954625
ENSDARG00000062286	DUPD1		0	0
ENSDARG00000062289	edaradd	566761	123.43	240.471	0.903066	3.20926e-06	1.30142e-05
ENSDARG00000005335	slc22a4	393822	0.938489	0	-0.156085	0.536141
ENSDARG00000005332	lipib		0	8.14505	1.18866	0.00196122	0.00525592
ENSDARG00000102489	BX000534.3		0.234622	0.841332	0.103312	0.716457
ENSDARG00000102488	FO704745.1		0.296094	0	-0.0595005	0.782557
ENSDARG00000102487	Metazoa_SRP		34.7695	6.0745	-1.65753	0.00032209	0.00099107
ENSDARG00000102486	si:ch73-359m17.11		0.296094	0	-0.0595005	0.782557
ENSDARG00000102485	U1		0.601652	0.261671	-0.00750837	0.96807
ENSDARG00000102484	U6		0	0
ENSDARG00000102483	numa1	572344	5581.96	4517.92	-0.303243	0.000259866	0.000812857
ENSDARG00000102482	CYSTM1	100073329	636.85	444.682	-0.510608	2.1294e-06	8.84624e-06
ENSDARG00000102481	U1		0	0
ENSDARG00000102480	BX005417.3		0	0
ENSDARG00000101590	CU467964.3		0.530717	0.681677	0.0106931	0.973047
ENSDARG00000101591	CU695215.2		5.34682	6.19538	0.125331	0.798094	0.86182
ENSDARG00000101593	zgc:163077	567932	2.59211	7.75452	0.59816	0.219537	0.326788
ENSDARG00000101594	si:dkey-246j6.1		0	0
ENSDARG00000101595	tgm1l2	793096	5.71494	11.889	0.465784	0.344817	0.465488
ENSDARG00000101596	5S_rRNA		0.469245	0.261671	-0.0471503	0.855083
ENSDARG00000101597	si:dkeyp-57d7.4	101885851	1.06143	3.30769	0.426418	0.341213	0.46177
ENSDARG00000101598	si:ch211-215p11.1		0.703867	2.41934	0.225807	0.511151	0.628787
ENSDARG00000101599	BX681417.3		0	0
ENSDARG00000014898	ncbp2	192325	2019.11	1355.07	-0.566773	6.35354e-11	4.18473e-10
ENSDARG00000027172	phactr2	570136	698.392	995.788	0.49842	3.26442e-07	1.50421e-06
ENSDARG00000080569	5S_rRNA		0	0
ENSDARG00000080568	dre-mir-731		0	0
ENSDARG00000080563	CU138537.1		0	0
ENSDARG00000080562	U6atac		3.6932	1.12984	-0.455886	0.277205	0.392803
ENSDARG00000080565	dre-mir-212		0	0
ENSDARG00000058558	lzts3b	560221	19.8777	21.349	0.045877	0.911923	0.941505
ENSDARG00000054903	mta3	100003254	3310.56	2299.7	-0.525658	1.06764e-25	1.79705e-24
ENSDARG00000054906	ier5l	326935	68.3251	197.205	1.44567	5.65839e-11	3.74327e-10
ENSDARG00000054907	cox7a3	335751	1708.68	1261.44	-0.437287	4.2433e-10	2.60681e-09
ENSDARG00000102231	U1		0	0
ENSDARG00000039677	dsc2l	560091	100.853	145.603	0.507126	0.0134339	0.0297818
ENSDARG00000055056	si:ch73-129a22.11		0	0
ENSDARG00000055054	bcl9l	449532	670.375	873.753	0.373866	0.000104033	0.000345692
ENSDARG00000055053	itih1	564761	2.40661	2.49584	0.031372	0.929119	0.952417
ENSDARG00000055052	map2		47.6005	81.8222	0.687345	0.0207751	0.0438526
ENSDARG00000004060	bhlhe40	324413	71.4602	90.8926	0.279831	0.367114	0.488402
ENSDARG00000105455	si:dkey-10h3.7		0.938489	0	-0.156085	0.536141
ENSDARG00000105454	AL928854.1		0	0
ENSDARG00000105457	si:cabz01021066.1		0.296094	0	-0.0595005	0.782557
ENSDARG00000105456	FO834831.1		0	0
ENSDARG00000105451	si:cabz01068815.1	569661	382.205	197.262	-0.92712	4.13103e-08	2.09413e-07
ENSDARG00000105450	si:ch211-63p21.1	100148594	22.8358	19.9319	-0.146372	0.720762	0.804083
ENSDARG00000105453	kcnk17	101882139	1.2033	0	-0.113212	0.49813
ENSDARG00000105452	plxna1a		643.88	898.301	0.467759	1.58241e-06	6.69919e-06
ENSDARG00000105459	CU457819.8		25.8138	12.4176	-0.808555	0.0482973	0.0916603
ENSDARG00000105458	si:dkeyp-81f3.4	101884343	0	1.26134	0.239111	0.382956
ENSDARG00000045493	slc35e3	563675	192.724	382.982	0.944311	1.12467e-08	6.01817e-08
ENSDARG00000075217	tdrd12		529.906	463.957	-0.187814	0.104723	0.177202
ENSDARG00000075215	vetz	100136856	1152.62	1501.52	0.370421	7.3933e-06	2.87236e-05
ENSDARG00000075212	march11		53.8517	24.3764	-0.961309	0.00536355	0.0131478
ENSDARG00000075211	chd7	569471	21422.2	13211.9	-0.694781	3.5797e-26	6.15254e-25
ENSDARG00000056504	frg1	550491	489.634	596.072	0.286277	0.00622161	0.0150158
ENSDARG00000006514	her6	30288	51.2104	156.552	1.51458	3.20098e-11	2.16149e-10
ENSDARG00000003599	rpl3	322571	24141	11202.5	-1.1041	6.72647e-126	9.06543e-124
ENSDARG00000056501	si:ch211-208g24.8	799658	0	0
ENSDARG00000056502	si:ch73-334d15.4	796217	0	0
ENSDARG00000056509	pdik1l	569665	3338.48	2881.13	-0.210702	9.77297e-05	0.000326021
ENSDARG00000003592	surf1	557970	973.473	536.146	-0.840985	1.15853e-15	1.11362e-14
ENSDARG00000052435	spred2a	558432	0.469245	16.309	1.86893	0.0003647	0.00111203
ENSDARG00000039093	got1	406330	949.262	1563.3	0.7124	1.53901e-19	1.92175e-18
ENSDARG00000052437	mia	569807	0.469245	4.41201	0.505834	0.164953	0.259208
ENSDARG00000039095	nkx2.3	30698	3.05009	2.52003	-0.0446867	0.89091	0.927364
ENSDARG00000063905	mt-co1	140539	4718.92	48391.6	3.34025	0	0
ENSDARG00000039096	si:dkey-24p1.1	556718	16.4446	28.701	0.639048	0.114897	0.191743
ENSDARG00000039099	aep1	503710	0	0
ENSDARG00000039098	ca8	550233	25.0998	39.8586	0.533325	0.137923	0.223156
ENSDARG00000052438	actr2a	406820	1736.43	1927.03	0.151686	0.0169468	0.0365495
ENSDARG00000003046	sorbs2a		48.7915	41.8741	-0.194424	0.519663	0.636161
ENSDARG00000102108	si:ch211-106g8.23		0	0
ENSDARG00000102109	pimr202		0.703867	1.26002	0.0561126	0.843799
ENSDARG00000003041	CABZ01111496.1		17.3435	67.1509	1.59542	1.24755e-05	4.68567e-05
ENSDARG00000095870	FP067424.2		0	0.261671	0.0452687	0.838603
ENSDARG00000102102	BX649453.2		0	0
ENSDARG00000102103	CR533575.1		1.2033	0	-0.113212	0.49813
ENSDARG00000102100	mrc1a	100286774	0.703867	5.96852	0.529863	0.15333	0.243787
ENSDARG00000102101	si:ch73-174h16.5	100003472	3.76522	3.83235	-0.00472681	0.991645	0.995108
ENSDARG00000102106	tgm1l1	566581	13.7874	10.614	-0.221938	0.652312	0.749411
ENSDARG00000098881	si:dkey-238i5.3		2.2742	0	-0.303696	0.231477
ENSDARG00000102104	CU855889.1		0.469245	0	-0.109564	0.674215
ENSDARG00000102105	dad1	566527	2355.47	1967.31	-0.254941	0.000193776	0.000618652
ENSDARG00000032326	mecr	550550	231.818	201.848	-0.203389	0.20765	0.312482
ENSDARG00000032327	usp36	327239	1692.83	3842.85	1.17762	4.45382e-105	4.97351e-103
ENSDARG00000032324	epb41l5	368449	3343.54	3616.56	0.109561	0.0330519	0.0659889
ENSDARG00000095872	CR352226.6		0	0
ENSDARG00000037946	prl	791526	21.6296	15.5361	-0.352223	0.393596	0.515285
ENSDARG00000037941	syt5a	436686	0	0.579661	0.0976532	0.685301
ENSDARG00000037943	cpt1cb	550361	264.727	314.692	0.240732	0.129761	0.211952
ENSDARG00000035899	lingo1b	447837	2.38768	1.04669	-0.157373	0.644047	0.742842
ENSDARG00000098885	CU138548.6		0	0
ENSDARG00000000588	grasp	558950	845.861	1253.03	0.563987	3.78005e-14	3.26857e-13
ENSDARG00000035895	fndc5b	555635	20.0119	16.4312	-0.238876	0.586667	0.696008
ENSDARG00000035891	acana	497505	7.12159	2.61671	-0.421909	0.347933	0.468723
ENSDARG00000035890	fuca1.1	335494	1035.31	1080.15	0.0544021	0.502242	0.620249
ENSDARG00000029242	fbxo3	553731	269.294	485.097	0.824019	2.19789e-10	1.38018e-09
ENSDARG00000029248	fubp1	406418	4907.67	5088.59	0.0520857	0.269018	0.383706
ENSDARG00000088100	KCNIP4		2.29602	2.04503	-0.0623871	0.879213	0.91949
ENSDARG00000088104	U6		0	0
ENSDARG00000060349	wasf1		0	0
ENSDARG00000060348	map3k3	560211	74.3103	154.604	0.983636	8.34579e-06	3.21937e-05
ENSDARG00000060340	si:dkey-157l19.2	561062	1118.37	1553.21	0.465532	6.51945e-07	2.91074e-06
ENSDARG00000060345	apoda.1	767642	1.48047	0.785014	-0.0800257	0.774195
ENSDARG00000071240	aars2	792787	1245.49	1210.86	-0.0369	0.652207	0.749334
ENSDARG00000071241	trim35-39	557841	38.012	44.5041	0.198754	0.568124	0.680287
ENSDARG00000069998	si:ch211-145b13.6	100317105	6.65234	20.4739	1.07758	0.0205726	0.0434532
ENSDARG00000008370	csnk1da	322106	5548.95	4153.87	-0.416276	5.50761e-24	8.61727e-23
ENSDARG00000008372	spred2b	793290	31.2734	76.6821	1.12402	0.000285536	0.000887397
ENSDARG00000069995	dpy19l1l	368327	7.71486	42.7131	1.59513	0.000543558	0.0016096
ENSDARG00000069996	dnajb14	792752	0	4.29674	0.493737	0.0710993	0.127657
ENSDARG00000097546	si:ch211-40k21.9		51.4775	23.6852	-0.932448	0.00855272	0.019876
ENSDARG00000004297	irf2bpl	324723	559.866	499.716	-0.168845	0.173718	0.270372
ENSDARG00000100138	CR749168.3		0	0
ENSDARG00000074999	CU896602.3		0	0.28983	0.0452687	0.838603
ENSDARG00000004806	grwd1	445115	2858.3	2534.32	-0.169488	0.00791272	0.0185631
ENSDARG00000074996	tbrg1	573117	1580.05	1419.86	-0.148524	0.0596609	0.109897
ENSDARG00000074995	eif2b5		2428.68	1655.11	-0.54873	5.55891e-17	5.90392e-16
ENSDARG00000010524	si:ch211-282j22.3	562939	451.742	812.65	0.840233	2.47451e-17	2.69397e-16
ENSDARG00000082349	BX469885.1		0	0
ENSDARG00000068640	rsf1b.1	327618	2816.99	3687.74	0.381361	0.000460007	0.00137769
ENSDARG00000068641	taf10	556710	1551.34	1034.34	-0.577859	1.41733e-12	1.07106e-11
ENSDARG00000083131	BX649502.1		0	0
ENSDARG00000083139	CT573279.1		0	0
ENSDARG00000088810	prox1b	564431	83.4453	120.579	0.493876	0.0477485	0.0907951
ENSDARG00000088813	ppp1r3ab	100001260	0	0
ENSDARG00000076735	si:dkey-193c22.2	101882096	2.79545	50.4786	2.81982	4.533e-09	2.51017e-08
ENSDARG00000088817	wdr59	103909113	841.06	892.844	0.07956	0.387102	0.508555
ENSDARG00000088816	trabd2b	566028	20.977	20.4755	-0.0538909	0.895238	0.930027
ENSDARG00000088818	CR318646.1		0	0
ENSDARG00000032816	tm7sf2	494054	3.5306	20.1254	1.34753	0.00617723	0.0149253
ENSDARG00000094470	txnrd2		7.07247	9.99693	0.214985	0.664003	0.760072
ENSDARG00000094471	CU137648.1		0	0
ENSDARG00000087867	CABZ01043956.1	101882338	2.36876	0	-0.217443	0.297798
ENSDARG00000087869	si:ch211-11k18.4	559333	7096.33	6484.97	-0.12839	0.00651211	0.0156487
ENSDARG00000058958	TRIM35	103908634	370.645	507.081	0.456558	8.46076e-05	0.000284824
ENSDARG00000058953	abcc4	368620	560.139	973.916	0.779878	1.47841e-12	1.11592e-11
ENSDARG00000015325	u2af1	192328	3011.16	2396.07	-0.325629	2.2171e-07	1.04075e-06
ENSDARG00000077086	ankrd34ba	560938	0	0
ENSDARG00000086419	si:ch211-282j17.13	794438	0	0
ENSDARG00000077087	si:ch211-196g2.4		0	1.94169	0.252728	0.307701
ENSDARG00000086412	taar12c	100034601	0	0
ENSDARG00000086411	srsf10b	393505	1899.62	1460.9	-0.379198	6.99272e-08	3.45691e-07
ENSDARG00000081837	dre-mir-15a-2		0	0
ENSDARG00000086416	med11		391.218	332.168	-0.221163	0.102385	0.174059
ENSDARG00000086414	U5		0.296094	0	-0.0595005	0.782557
ENSDARG00000105461	si:dkey-11o1.6		0	0
ENSDARG00000085336	5S_rRNA		0	0
ENSDARG00000077089	blm	572540	3726.61	4040.76	0.1122	0.0470964	0.0897035
ENSDARG00000001971	cthrc1b	566140	0	0
ENSDARG00000097941	si:ch211-207d10.2		76.5725	28.1764	-1.30435	2.00064e-05	7.32124e-05
ENSDARG00000097940	pimr175		0	0
ENSDARG00000097947	mespbb	100148845	2.65358	2.41136	-0.040605	0.924321	0.949689
ENSDARG00000097946	CR354430.3		3.32617	3.88603	0.0933318	0.846342	0.896043
ENSDARG00000097945	CU137681.6		0	0
ENSDARG00000001976	fkbp16		135.588	104.495	-0.369345	0.0847077	0.148237
ENSDARG00000022615	si:ch211-241e1.3	567640	0.592189	0	-0.113212	0.633626
ENSDARG00000097948	BX901883.3		99.9572	65.0559	-0.556995	0.0347612	0.0689088
ENSDARG00000089651	CR936465.1		0.296094	0.420006	-0.00750835	0.96807
ENSDARG00000101261	FO704813.2		0	0.420006	0.0452687	0.838603
ENSDARG00000018285	pdpk1b	403000	3832.82	3487.88	-0.137098	0.00242233	0.00638656
ENSDARG00000030411	crygn2		3.60334	8.22287	0.487299	0.3206	0.440372
ENSDARG00000034309	cox10	553384	196.797	357.25	0.85259	2.77632e-06	1.13575e-05
ENSDARG00000000002	ccdc80	368419	89.0013	182.622	0.960836	8.57731e-06	3.30281e-05
ENSDARG00000034307	chrne	445315	0	1.15932	0.147077	0.51208
ENSDARG00000040822	fundc1	436984	310.229	555.967	0.837989	2.49168e-12	1.84721e-11
ENSDARG00000000001	slc35a5	368418	401.152	636.833	0.665051	6.10299e-10	3.68556e-09
ENSDARG00000034300	sema3c	553130	1.94972	0	-0.287253	0.262361
ENSDARG00000089659	U6		0	0
ENSDARG00000098772	gig2d	100005232	1.53068	3.65516	0.280719	0.506827	0.624726
ENSDARG00000069201	taar13e	100034381	0.592189	0	-0.113212	0.633626
ENSDARG00000069203	taar13d	100034379	0.296094	0	-0.0595005	0.782557
ENSDARG00000069205	taar13c	100034378	0	0
ENSDARG00000069206	taar15	100034377	0	0
ENSDARG00000069208	stx7l	562669	13.631	24.3695	0.657014	0.127507	0.208917
ENSDARG00000016141	slc6a2	565776	6.69019	4.09403	-0.181229	0.680717	0.77327
ENSDARG00000016143	xiap	373108	1242.26	1072.07	-0.214222	0.00242721	0.00639771
ENSDARG00000074607	BX005421.4		0.703867	0	-0.139354	0.595253
ENSDARG00000079274	prss59.1	322453	65.2735	9.30437	-2.09718	1.242e-06	5.32146e-06
ENSDARG00000074604	phc3	558094	962.237	402.225	-1.24215	4.29415e-39	1.1903e-37
ENSDARG00000079271	dcxr	550282	837.684	492.298	-0.749008	1.10294e-09	6.51559e-09
ENSDARG00000074602	mrvi1	100331961	1.7653	6.58162	0.455979	0.282405	0.39838
ENSDARG00000074601	cbln2a	556853	0	0
ENSDARG00000079272	tmem14cb	447871	105.244	116.458	0.12833	0.551711	0.665774
ENSDARG00000079278	zgc:174877	570025	28.8999	62.3319	0.853872	0.0267219	0.0547666
ENSDARG00000038802	cenpl	445401	1239.1	1183.24	-0.0703085	0.453704	0.574687
ENSDARG00000017891	tcp1	30477	8324.03	5905.99	-0.492591	7.51647e-35	1.84069e-33
ENSDARG00000045951	kat5b	503731	1632.14	1815.46	0.155783	0.0174225	0.0374307
ENSDARG00000045957	gpr65	100537038	0	0
ENSDARG00000045956	kcnk10b	565629	0	0
ENSDARG00000045955	prlrb	561846	0	11.8446	1.67896	0.000130624	0.000427797
ENSDARG00000045959	csf3r	100134935	3.54187	2.46768	-0.144856	0.741534	0.819747
ENSDARG00000045958	egfl6	436730	0	0
ENSDARG00000041062	calb2a	393691	0	0
ENSDARG00000041060	lgals9l3	327284	170.601	90.0255	-0.885931	4.4528e-06	1.77512e-05
ENSDARG00000041065	hspb1	368243	44.7814	95.8588	1.00487	0.000160576	0.000518759
ENSDARG00000041068	got2a	406688	1932.88	2123.51	0.137599	0.0760759	0.135349
ENSDARG00000038500	cep41	431741	130.09	207.909	0.647	0.000761485	0.00220002
ENSDARG00000077950	tor1	565062	2269.33	2212.28	-0.0356212	0.532053	0.647287
ENSDARG00000077955	rnf6	100359398	239.782	384.913	0.666283	2.00876e-06	8.36819e-06
ENSDARG00000077959	HTR3C		0	0
ENSDARG00000045485	rassf8b	393334	2.36876	41.383	2.19152	8.77693e-06	3.37502e-05
ENSDARG00000045484	dcp1b	568176	135.465	253.378	0.894983	6.92256e-07	3.07754e-06
ENSDARG00000045487	rps16	767765	3746.67	2771.64	-0.430288	2.3879e-11	1.62877e-10
ENSDARG00000045486	pawr	449994	405.64	490.447	0.263802	0.0478666	0.0909931
ENSDARG00000094559	zgc:174855	569326	0	0
ENSDARG00000075551	aifm5	557064	2.96094	2.25968	-0.0742019	0.837025	0.889513
ENSDARG00000045483	lrtm2a	557289	6.10089	8.00689	0.212136	0.662686	0.758875
ENSDARG00000045482	stk38l	393957	1681.3	1555.85	-0.109056	0.110831	0.186036
ENSDARG00000094555	BX470218.2		1.13237	0.28983	-0.183514	0.538557
ENSDARG00000094554	si:ch73-7i4.1	100317638	131.377	80.9302	-0.646197	0.00367164	0.00931955
ENSDARG00000094557	nupr1	799637	44.9233	528.516	3.41914	5.0409e-71	3.28364e-69
ENSDARG00000094556	si:dkey-24h22.5		0	0
ENSDARG00000094551	BX855614.1		0.888283	4.01753	0.497197	0.233736	0.343693
ENSDARG00000075559	ppm1g	368275	8586.01	6461.36	-0.41	2.72874e-25	4.53444e-24
ENSDARG00000094552	CR450805.3	795735	0	0
ENSDARG00000041394	dnajb1b	327244	3636.46	2657.97	-0.454638	6.08237e-17	6.44237e-16
ENSDARG00000041397	eif2b2	405839	2528.15	1948.55	-0.369988	2.81786e-08	1.44836e-07
ENSDARG00000041391	tmed10	326716	4152.96	2588.7	-0.675634	5.36015e-34	1.26967e-32
ENSDARG00000041399	adgre7		0	0
ENSDARG00000089777	U6		0	0.261671	0.0452687	0.838603
ENSDARG00000085497	RNaseP_nuc		1.23458	0.869491	-0.0653497	0.837835
ENSDARG00000017230	fbxw11b	406825	6981.83	6388.68	-0.128706	0.00351751	0.00897494
ENSDARG00000017235	eif5a	406464	5486.41	3296.26	-0.731683	2.87139e-59	1.4278e-57
ENSDARG00000017234	npy8ar	30714	5.23334	1.62503	-0.559257	0.221044	0.328533
ENSDARG00000078603	myo1hb		476.732	213.942	-1.12334	8.05158e-13	6.20197e-12
ENSDARG00000078602	ptger1c	100003535	0	0
ENSDARG00000078600	ldlrad3	570705	4.18317	29.6364	1.69122	0.000400302	0.0012102
ENSDARG00000078606	zgc:194224	799070	286.704	334.387	0.216403	0.129883	0.212098
ENSDARG00000078605	ptger1a	559315	0	0
ENSDARG00000078604	tbc1d10b		782.586	1446.25	0.871639	2.29854e-26	3.99155e-25
ENSDARG00000099127	CU041396.1		0.888283	2.41934	0.193487	0.568564	0.680644
ENSDARG00000099126	CABZ01055168.1		0	0
ENSDARG00000099125	ACEA_U3		0	0
ENSDARG00000078608	CT573423.1		0	0
ENSDARG00000099123	HIST1H2AL	100006331	13.9471	8.13707	-0.527055	0.249633	0.361867
ENSDARG00000099122	naa38	335819	988.057	1110.27	0.172848	0.0329987	0.0659233
ENSDARG00000099121	si:dkey-6d5.1		43.3559	27.6772	-0.568944	0.125947	0.206984
ENSDARG00000099120	CR932000.2		59.8045	93.2457	0.540141	0.0934037	0.161131
ENSDARG00000084729	5S_rRNA		0	0
ENSDARG00000084720	5S_rRNA		0	0
ENSDARG00000084727	U6		0	0
ENSDARG00000043502	ccdc124	393537	1864.79	1590.02	-0.229074	0.000616693	0.00181279
ENSDARG00000099985	cyr61l2	553273	0	9.60508	1.47049	0.000462859	0.00138581
ENSDARG00000009544	cldnb	81581	24.3636	7.14802	-1.23283	0.00585801	0.0142243
ENSDARG00000009549	ubr4	407625	8181.08	4798.09	-0.766099	3.12106e-22	4.49129e-21
ENSDARG00000043509	rpl11	415229	5642.86	3794.06	-0.566618	3.40506e-16	3.40715e-15
ENSDARG00000099987	FP236356.2		3.81434	1.04669	-0.295364	0.410444	0.531538
ENSDARG00000091459	si:dkey-52k1.6	100150704	1.2033	0	-0.113212	0.49813
ENSDARG00000099986	si:ch211-207i20.2	568537	1822.47	1646.34	-0.140518	0.0366178	0.0721501
ENSDARG00000099981	si:ch1073-228h2.2		313.772	255.542	-0.297422	0.0313471	0.0629713
ENSDARG00000091457	CABZ01072538.1	101885310	0	0
ENSDARG00000093384	si:ch211-150d5.3		0	0
ENSDARG00000095200	si:ch211-197e7.1		0	0
ENSDARG00000095206	BX649610.1		0	0
ENSDARG00000095204	AL935117.1		0	0
ENSDARG00000095205	BX649502.11		0	0
ENSDARG00000099982	ccl39.7		6.80476	4.8092	-0.212181	0.653027	0.750056
ENSDARG00000077553	rap2aa	100332969	91.7826	168.862	0.827198	0.000114958	0.000379607
ENSDARG00000045224	glipr1a	108179203	0	3.65516	0.449837	0.0976686	0.167269
ENSDARG00000008637	mtp	406207	0	8.65513	0.756223	0.0100548	0.0229732
ENSDARG00000008639	kifap3a	447906	237.674	445.323	0.897216	1.41212e-10	9.03886e-10
ENSDARG00000045228	stub1	324243	450.74	628.619	0.478769	2.79205e-06	1.14195e-05
ENSDARG00000015853	rnps1	327020	3764.08	2724.56	-0.46452	9.36881e-21	1.24718e-19
ENSDARG00000099789	si:ch211-76m11.7		0	0
ENSDARG00000099788	CABZ01085971.1		0	0
ENSDARG00000099783	pcdh2ac	493587	0	0
ENSDARG00000099782	CR383669.2		0	0
ENSDARG00000099781	asip2b	796595	8.13281	2.61671	-0.49062	0.276711	0.392366
ENSDARG00000099780	CT737196.1		4.36868	3.96919	-0.0605898	0.890355	0.926876
ENSDARG00000099787	echdc3		86.0159	47.2441	-0.772777	0.0066423	0.0159151
ENSDARG00000099785	si:dkey-146m20.13		0	0
ENSDARG00000099784	FP016247.2		0	0
ENSDARG00000054237	taar16a	103911781	0	0
ENSDARG00000096159	si:dkeyp-98a7.3	564145	4196.42	2042.88	-1.03104	7.07053e-68	4.33142e-66
ENSDARG00000096157	si:dkey-40n15.1		0	0.523343	0.0976532	0.703901
ENSDARG00000096156	si:dkey-21h14.11		0.592189	0	-0.113212	0.633626
ENSDARG00000096155	BX649516.5		0	0
ENSDARG00000096154	CU695141.1		0	0
ENSDARG00000096153	si:dkey-21h14.9		9.72316	1.36335	-1.18478	0.0147221	0.0322569
ENSDARG00000096152	si:dkey-149m13.4		0	0
ENSDARG00000011301	nae1	573336	866.55	821.722	-0.0709374	0.471743	0.591201
ENSDARG00000014159	mtdha	368910	4925.3	5813.82	0.239603	7.94889e-09	4.32574e-08
ENSDARG00000015732	cax2	558687	0.469245	0	-0.109564	0.674215
ENSDARG00000022280	brd2a	30445	10259.1	5595.67	-0.870775	6.5929e-42	1.9944e-40
ENSDARG00000056519	si:dkey-280e21.3	557118	29.6736	21.4026	-0.408142	0.296831	0.414067
ENSDARG00000099879	U1		0.601652	0.551502	0.0400055	0.856902
ENSDARG00000099878	U6		0	0.420006	0.0452687	0.838603
ENSDARG00000099875	CU469093.1		0.530717	1.10168	0.100476	0.767323
ENSDARG00000099874	agap2	565109	11.1414	9.13674	-0.203738	0.675775	0.769132
ENSDARG00000099877	si:dkeyp-72e1.6	100148910	5.23334	0	-0.911372	0.0106177	0.0241466
ENSDARG00000015731	ano5a	100534737	4.11152	1.8867	-0.27741	0.502235	0.620249
ENSDARG00000099871	myo7aa	252846	0.938489	148.421	4.88476	3.39858e-18	3.91829e-17
ENSDARG00000099870	zgc:101560	449825	0	0
ENSDARG00000099873	zgc:163083	566848	2.41896	0.420006	-0.345976	0.238984	0.349359
ENSDARG00000099872	znf1092		0.888283	1.8317	0.0978028	0.734324	0.814165
ENSDARG00000101263	BX927317.2		0	0
ENSDARG00000055216	tuba1c	573122	149.042	137.13	-0.120855	0.531087	0.646353
ENSDARG00000101267	U1		0	0
ENSDARG00000059743	tmem98	569392	2.48043	4.00955	0.168153	0.697415	0.786504
ENSDARG00000053326	gna11b	493613	776.337	901.252	0.204644	0.0707644	0.127126
ENSDARG00000059741	alpk1	100333928	165.767	226.016	0.42906	0.00925625	0.021351
ENSDARG00000019686	fgl2b	100001116	0	0
ENSDARG00000059746	plod1a	777635	1.17311	28.2436	2.29322	1.10452e-05	4.18224e-05
ENSDARG00000097208	ALKBH3	792266	17.2761	25.8832	0.391284	0.359427	0.480695
ENSDARG00000097209	cox8b	569770	97.8394	51.8538	-0.830882	0.00256589	0.00673145
ENSDARG00000097204	BX000524.1		0	0
ENSDARG00000097205	ulk2	100329702	11.4365	101.536	2.65937	2.84924e-14	2.49462e-13
ENSDARG00000097206	BX324206.1		0	0
ENSDARG00000097207	CR759882.1		0	1.7095	0.235358	0.3425
ENSDARG00000097200	BX120006.2		0	0
ENSDARG00000097202	CR407598.2		0.234622	0.841332	0.103312	0.716457
ENSDARG00000097203	si:ch211-176l24.4	100000098	30.5183	35.1663	0.18105	0.610293	0.714666
ENSDARG00000041830	tsn	334107	1915.52	2083.96	0.119753	0.0355074	0.0702457
ENSDARG00000025889	usp14	335736	2835.31	2684.38	-0.0738221	0.202276	0.305573
ENSDARG00000063914	mt-nd3	140533	74.1379	1472.92	4.23537	3.50057e-215	8.77026e-213
ENSDARG00000041835	ccl38a.5	563208	0.469245	0.420006	-0.0396296	0.855083
ENSDARG00000021806	zfp36l2	333941	4260.41	4255.42	-0.0035949	0.939194	0.959271
ENSDARG00000041839	tsc22d2	378875	1551.64	2453.38	0.65574	2.2136e-08	1.15201e-07
ENSDARG00000002831	col4a4	554270	59.5805	64.7419	0.0952405	0.768047	0.838876
ENSDARG00000096602	si:ch1073-357b18.4	797129	438.306	281.494	-0.618335	1.18021e-06	5.08234e-06
ENSDARG00000061697	ca14	567897	1.77657	0	-0.177991	0.396108
ENSDARG00000056748	CU856174.1		0.234622	0.28983	-0.00682666	0.977912
ENSDARG00000061692	yjefn3	557840	97.771	75.4781	-0.337177	0.207772	0.312642
ENSDARG00000061690	nxpe3	564277	593.114	1495.22	1.31657	1.59042e-60	8.11485e-59
ENSDARG00000061691	qpctla	561142	442.098	405.7	-0.113079	0.349155	0.470014
ENSDARG00000056742	crmp1	553756	0.703867	30.4174	2.6556	2.18475e-06	9.06269e-06
ENSDARG00000056743	murcb	494036	0	0
ENSDARG00000056740	tmeff1b	553511	16.3471	31.7135	0.729882	0.0709607	0.127455
ENSDARG00000056741	senp3b	565123	3405.51	2730.41	-0.314504	6.39514e-10	3.85602e-09
ENSDARG00000056744	ela2	403061	1.67255	0	-0.238324	0.338625
ENSDARG00000061699	sipa1l3	561005	104.01	90.534	-0.201568	0.382539	0.503778
ENSDARG00000012656	atf6	558071	1524.14	2320.77	0.594842	5.67513e-14	4.82189e-13
ENSDARG00000008757	entpd6	550560	747.849	1106.21	0.565333	7.9956e-12	5.66945e-11
ENSDARG00000021252	cct6a	116994	9431.9	6613.56	-0.508961	3.62065e-28	6.80334e-27
ENSDARG00000021250	slc25a48	436640	12.4702	33.1587	1.0642	0.0117358	0.0264096
ENSDARG00000021257	eif3d	336498	7538.01	4140.43	-0.859149	4.01826e-57	1.88762e-55
ENSDARG00000021255	arhgap22	562503	0.938489	11.5521	1.15448	0.0145028	0.0318263
ENSDARG00000056294	SBK1	559792	6.23511	45.3263	2.05697	3.40396e-06	1.37537e-05
ENSDARG00000056292	vsx1	30598	23.5691	32.5347	0.364168	0.330957	0.451551
ENSDARG00000093038	CR513782.2		0	0
ENSDARG00000052535	ubxn10	751736	0	2.09337	0.194596	0.359633
ENSDARG00000052537	cptp	791641	75.1703	122.198	0.669936	0.00455091	0.0113162
ENSDARG00000052536	tia1	793165	5283.79	4275.26	-0.302177	7.34258e-11	4.82315e-10
ENSDARG00000054584	FO681288.1	100002134	60.328	26.024	-1.03821	0.00296975	0.00768774
ENSDARG00000057169	abca4a	798993	89.3446	77.8374	-0.201215	0.464365	0.584419
ENSDARG00000054583	mfsd6b		1542.78	1587.94	0.0460472	0.520894	0.637083
ENSDARG00000057167	eif4g2b	334618	15230	10088	-0.594115	2.44231e-67	1.47308e-65
ENSDARG00000057166	c13h10orf11	553730	79.1948	78.2025	-0.0345459	0.891716	0.927837
ENSDARG00000054588	cox6a2	447942	9.61329	8.94227	-0.0521842	0.914869	0.943347
ENSDARG00000090267	CU062628.1	103908930	32.5204	12.6346	-0.685248	0.159381	0.25191
ENSDARG00000094965	nfil3-5	335737	67.7667	248.231	1.72972	6.31998e-14	5.335e-13
ENSDARG00000094960	AL929032.1		0	0.523343	0.0976532	0.703901
ENSDARG00000094961	BX530407.6		0	0
ENSDARG00000094962	CR377211.2		0	0
ENSDARG00000090260	BX470083.4		0.897746	1.26134	0.106302	0.749551
ENSDARG00000090268	krtt1c19e	553371	2.14179	0	-0.299455	0.241887
ENSDARG00000061030	vezf1b	556915	201.681	310.319	0.594166	0.000233762	0.00073716
ENSDARG00000061031	dner		18.6639	14.9565	-0.252757	0.562636	0.675454
ENSDARG00000061039	atp10a	567172	731.003	1151.17	0.641718	4.53413e-10	2.78023e-09
ENSDARG00000071007	pcgf5a	562327	3.29598	13.6763	1.00259	0.0430381	0.083116
ENSDARG00000071004	abhd12	767657	526.486	508.409	-0.0443699	0.711477	0.797109
ENSDARG00000071005	ppp1r3ca	436649	188.021	556.938	1.53329	8.31524e-33	1.8764e-31
ENSDARG00000071001	si:dkeyp-85e10.1		1.40773	0	-0.174288	0.443275
ENSDARG00000071009	kif20ba	449979	4156.73	3536.88	-0.234633	5.98522e-05	0.000205848
ENSDARG00000011683	prtfdc1	30765	2331.37	1881.71	-0.307158	2.57184e-06	1.05697e-05
ENSDARG00000022509	cox4i2	393776	11.6718	53.2894	1.81915	3.06796e-06	1.24645e-05
ENSDARG00000022503	pkd2l1	567026	16.2089	23.0614	0.402002	0.371606	0.493204
ENSDARG00000055989	tmem161b	406680	462.653	407.359	-0.18724	0.104198	0.176604
ENSDARG00000055986	si:ch211-165b19.5	100001065	0	0
ENSDARG00000055983	v2rh12	556991	0	0.261671	0.0452687	0.838603
ENSDARG00000020618	zgc:112056	550355	1459.19	1447.29	-0.00777965	0.905501	0.937201
ENSDARG00000020611	si:ch211-160d20.3	692267	325.769	240.036	-0.414044	0.0116202	0.0261826
ENSDARG00000020610	tnnt2a	58071	0	0.785014	0.127355	0.606835
ENSDARG00000060633	usp16	569700	2092.14	1978.39	-0.0810299	0.187691	0.287743
ENSDARG00000060631	GARNL3	560594	3.41892	2.31864	-0.110292	0.77479	0.844465
ENSDARG00000060637	clstn2	100125749	10.2342	19.8233	0.490029	0.31704	0.436648
ENSDARG00000028027	trim63a	415223	0.469245	0	-0.109564	0.674215
ENSDARG00000060639	apba2b	327160	90.2642	53.6124	-0.683718	0.0286199	0.0581807
ENSDARG00000060638	CLSTN2	569664	0	0
ENSDARG00000103523	nudt6	100037370	190.351	175.722	-0.1147	0.493009	0.611473
ENSDARG00000103522	si:zfos-943e10.1	327483	2567.27	3021.7	0.232147	7.3669e-05	0.000250372
ENSDARG00000103521	capsla	550371	194.382	93.8589	-0.996865	5.99231e-07	2.68274e-06
ENSDARG00000103520	si:dkey-148a17.5	100535037	0.592189	0	-0.113212	0.633626
ENSDARG00000103527	si:dkeyp-35e5.9	108183931	0	0
ENSDARG00000103526	Metazoa_SRP		39.1487	6.6717	-1.91969	5.15604e-06	2.03925e-05
ENSDARG00000103525	YTHDC2		64.5642	62.3616	-0.0257464	0.928918	0.952417
ENSDARG00000103524	U6		0	0
ENSDARG00000018653	acot7	447878	6.77637	9.06552	0.166412	0.736198	0.815479
ENSDARG00000018650	gtpbp3	553807	1070.73	739.232	-0.520311	1.52028e-07	7.27993e-07
ENSDARG00000103528	FP243383.1		0.296094	1.52301	0.273273	0.412525
ENSDARG00000053666	myb	30519	2.07266	3.36533	0.121281	0.748479	0.824834
ENSDARG00000053665	gabrg2	553402	0	0
ENSDARG00000101965	BX927287.2		0	0
ENSDARG00000101964	CTRL	100003031	0	3.36269	0.599667	0.0630067	0.115166
ENSDARG00000101967	sult4a1	678517	0	0
ENSDARG00000101966	BX664606.2		0	0
ENSDARG00000101961	abhd18	503769	2546.06	2045.43	-0.314949	1.32166e-09	7.75148e-09
ENSDARG00000101960	si:dkeyp-44d3.3		0	1.04669	0.142437	0.535018
ENSDARG00000101963	tmem141	767658	146.468	117.657	-0.287679	0.170708	0.266472
ENSDARG00000101962	BX649328.3		0	0
ENSDARG00000101969	QRFPR		0	0
ENSDARG00000101968	si:ch211-227p7.1		0	0
ENSDARG00000004396	b3gnt5b	791470	1695.51	1610.34	-0.0688397	0.361119	0.482364
ENSDARG00000105277	cnksr3	100003037	15.4861	1.15932	-1.4644	0.00262195	0.00686563
ENSDARG00000105276	grb2a	493609	66.6962	263.968	1.85626	8.44911e-19	1.00556e-17
ENSDARG00000105271	SEPT4		46.9906	44.1556	-0.0666149	0.848189	0.897515
ENSDARG00000105273	FP074902.3		303.927	84.3154	-1.75597	1.17839e-17	1.3099e-16
ENSDARG00000105272	CU459186.8		0	0.523343	0.0976532	0.703901
ENSDARG00000105279	si:ch211-108c17.2	100334602	966.101	870.546	-0.147579	0.132179	0.215289
ENSDARG00000087120	slc5a8	100329285	1.48047	2.49584	0.117527	0.746263	0.82318
ENSDARG00000031483	col9a1b	406548	0	0
ENSDARG00000036159	trhrb	569382	0	0
ENSDARG00000036158	nudcd1	553654	2927	2391.96	-0.292374	1.76656e-08	9.27515e-08
ENSDARG00000033307	igf2b	324215	34.684	97.7048	1.23813	0.000284736	0.000885331
ENSDARG00000036152	gas2b	567205	27.163	56.0228	0.846078	0.0149225	0.0326557
ENSDARG00000036155	gla	450083	247.251	280.891	0.190306	0.192282	0.293423
ENSDARG00000036156	fnbp1a	558990	0	0
ENSDARG00000036483	c1ql3b	403002	3.59098	2.41934	-0.117892	0.769015	0.83967
ENSDARG00000036482	hexim1	562319	5220.82	5858.97	0.168419	0.000502943	0.00149597
ENSDARG00000036481	tcn2	407646	177.464	162.75	-0.110022	0.539682	0.654572
ENSDARG00000026513	hoxb6b	58053	0	0
ENSDARG00000006899	far1	406829	602.944	646.246	0.0990246	0.294863	0.411851
ENSDARG00000006896	lhx6	445565	0.469245	2.14969	0.257119	0.447177	0.568336
ENSDARG00000036489	MAF1	569875	1708.84	1751.26	0.0333414	0.657689	0.754347
ENSDARG00000006894	oprk1	360139	0	6.85819	1.11609	0.00348347	0.00889506
ENSDARG00000006892	myo3b	564573	19.0811	7.02609	-0.913461	0.0532569	0.0995549
ENSDARG00000006891	kcns3a	565375	0	0
ENSDARG00000086658	crygm2d21	569000	0	0
ENSDARG00000086650	BX649444.1	101885759	64.6763	23.4516	-1.29028	5.82276e-05	0.00020049
ENSDARG00000086655	mkrn2os.1	100149633	10.7533	9.95123	-0.0516031	0.911282	0.941141
ENSDARG00000086654	cbln11	100149559	1.99992	1.04669	-0.137584	0.693575	0.783143
ENSDARG00000082576	U4		0.530717	0.28983	-0.0590201	0.816013
ENSDARG00000086656	U5		0	0
ENSDARG00000062674	btbd10a	560466	922.342	699.491	-0.396521	1.20516e-06	5.17953e-06
ENSDARG00000062672	si:dkey-100n10.2	100000044	31.5684	36.4088	0.178414	0.595546	0.703297
ENSDARG00000102728	CU856518.1		0	0
ENSDARG00000102729	SAMD9		0	0
ENSDARG00000102722	itih3b	613141	3.28471	4.41069	0.0941734	0.830373	0.885085
ENSDARG00000102720	zgc:123284	641422	0	0
ENSDARG00000102721	BX511155.1		1.12291	2.17653	0.191994	0.641902	0.741189
ENSDARG00000102726	CT737184.1		0	0
ENSDARG00000102727	si:ch73-182e20.4		14.3945	12.8873	-0.0656509	0.887856	0.925211
ENSDARG00000102724	zgc:153039		108.703	133.487	0.267799	0.231439	0.340956
ENSDARG00000101381	CU019562.2		0	0
ENSDARG00000101380	cryabb	436943	0	0
ENSDARG00000101383	BX088524.1		0.296094	0.28983	-0.00750836	0.96807
ENSDARG00000101382	CR388148.1		0	0
ENSDARG00000101385	f8	100302404	4.35741	3.0755	-0.153956	0.731739	0.812061
ENSDARG00000101384	Metazoa_SRP		32.2181	4.99035	-1.78128	0.000106338	0.00035293
ENSDARG00000101387	CAMK2N1	555986	5.12166	13.9741	0.863302	0.0718595	0.128833
ENSDARG00000101386	U6		0	0
ENSDARG00000101389	zgc:174180	100008100	0	0
ENSDARG00000101388	si:ch211-171l17.14	101884135	0	0
ENSDARG00000068934	cyp1b1	100150054	0	0
ENSDARG00000068937	si:ch211-218m3.11	108180809	1.35753	1.78336	0.0495852	0.896883	0.93139
ENSDARG00000100388	abhd5b		0	0
ENSDARG00000100389	nitr11a	558243	0	0
ENSDARG00000038467	igsf8	404631	206.688	435.932	1.07206	1.16942e-12	8.89212e-12
ENSDARG00000038465	stmn3	798970	0.703867	0.869491	0.0148475	0.958084
ENSDARG00000100382	CU138548.9		0	0
ENSDARG00000100383	il10ra	777651	1.64236	5.77537	0.471515	0.287754	0.40403
ENSDARG00000030656	sept3	554123	0	3.47796	0.275985	0.197345	0.299489
ENSDARG00000100381	rock2bl	108180208	32.2014	36.0799	0.125518	0.710666	0.796521
ENSDARG00000100386	si:dkey-61p9.9		0	0
ENSDARG00000100387	si:dkey-78o7.3		0	0.840011	0.0976532	0.602779
ENSDARG00000100384	CT990567.1		0.765339	0.971508	0.0297104	0.938296
ENSDARG00000100385	slc25a19	403024	134.813	196.089	0.504023	0.0160929	0.0349198
ENSDARG00000024619	si:ch211-206a7.2	566899	21.6401	14.8074	-0.436897	0.287028	0.403213
ENSDARG00000005271	zc3h12a		0	4.95955	0.834778	0.0167801	0.0362379
ENSDARG00000005274	rad52	554171	791.488	416.001	-0.918758	2.11263e-16	2.14914e-15
ENSDARG00000104603	CR847514.1		0	0
ENSDARG00000104602	5S_rRNA		0	0
ENSDARG00000104601	U3		0	0
ENSDARG00000104600	CABZ01070527.1		1.13237	1.39151	0.0694949	0.858122	0.905281
ENSDARG00000104607	U6		0	0
ENSDARG00000104606	BX537296.6		0	0
ENSDARG00000104605	si:ch73-299h12.4		402.564	364.794	-0.147795	0.270357	0.385148
ENSDARG00000104604	znf1099		1.18438	1.15932	-0.00460854	0.987027
ENSDARG00000104609	crebbpa	566841	2296.85	3885.45	0.75212	5.46636e-23	8.11114e-22
ENSDARG00000081007	CU469313.1		0	0
ENSDARG00000101039	zdhhc15a	449833	0	0
ENSDARG00000101038	U6		0	0
ENSDARG00000101033	si:ch211-106g8.28		0	0
ENSDARG00000101032	iqcb1	494079	97.7448	138.975	0.481461	0.0201692	0.0426795
ENSDARG00000101031	U1		0.296094	0.681677	0.0505042	0.816064
ENSDARG00000101030	si:ch73-158p21.3	326022	0	0
ENSDARG00000101037	asf1ba	386897	3624.49	3758.74	0.0556884	0.329657	0.450312
ENSDARG00000101036	traf2b	557526	230.765	279.288	0.271922	0.0789784	0.139661
ENSDARG00000101035	CU655870.1		0	0
ENSDARG00000101034	ZC3H12A	563108	6.94952	40.6556	1.66606	0.00027825	0.000866267
ENSDARG00000086383	or111-8	80372	0	0
ENSDARG00000038794	zgc:113531	541359	1.77657	2.20469	0.0509845	0.897746	0.932087
ENSDARG00000086381	U5		0	0
ENSDARG00000086387	U6		0	0
ENSDARG00000086386	U6		0	0
ENSDARG00000038793	ccdc24		2.81547	4.56105	0.129493	0.74358	0.82099
ENSDARG00000038792	klf17	65238	9.42996	27.1028	0.911893	0.0544787	0.10147
ENSDARG00000104721	si:dkey-203a12.9		32.8542	2.09337	-0.271591	0.186951	0.286946
ENSDARG00000037350	rpl9	336702	7300.77	4502.99	-0.69226	8.06361e-40	2.30042e-38
ENSDARG00000037353	frs2b	436931	1405.76	1347.93	-0.0592943	0.401426	0.522699
ENSDARG00000029865	rassf2a	447938	447.257	389.027	-0.193492	0.109375	0.18399
ENSDARG00000037357	WIPI1	100332293	0.703867	0	-0.139354	0.595253
ENSDARG00000037358	polr3e	336518	3412.96	2729.64	-0.317468	1.09159e-06	4.72464e-06
ENSDARG00000037359	si:ch1073-272o11.3	101886304	14.1213	6.43819	-0.701991	0.145252	0.23302
ENSDARG00000032496	pon1	447803	8.3285	15.1363	0.386754	0.425125	0.546152
ENSDARG00000055151	smyd2a	541423	1895.28	2474.05	0.38723	2.85991e-12	2.11095e-11
ENSDARG00000055154	slc8a4a	568512	1.18438	1.8867	0.0857172	0.801378	0.864315
ENSDARG00000055158	prox1a	30679	3.41892	6.46767	0.329434	0.496339	0.614551
ENSDARG00000055159	cyp27a1.4	322341	0	0
ENSDARG00000103899	rabepk	431756	113.545	131.134	0.203732	0.30368	0.421606
ENSDARG00000103898	CT737210.2		0	0
ENSDARG00000017023	ak7b	504040	15.2566	32.1939	0.637443	0.180114	0.278421
ENSDARG00000103893	srsf2b	323700	489.688	312.755	-0.600534	0.0147243	0.032258
ENSDARG00000103892	CABZ01074203.1	100332902	6.1027	70.9174	2.77308	4.4146e-12	3.19519e-11
ENSDARG00000103890	si:dkeyp-13d12.18		0	0
ENSDARG00000103897	si:dkey-161l11.66		0	0
ENSDARG00000103896	U1		0.296094	0.551502	0.0402944	0.868982
ENSDARG00000103895	U6		0	0.551502	0.0976532	0.69443
ENSDARG00000103894	BX000477.1		0	0
ENSDARG00000069326	mus81	406839	2554.51	1644.02	-0.631595	6.85942e-30	1.4007e-28
ENSDARG00000069327	nkx3.3		1.29606	1.15932	-0.0272039	0.935148
ENSDARG00000069324	vps53	492817	1632.72	1778.68	0.126058	0.040771	0.0792073
ENSDARG00000069323	si:ch73-122g19.1	101884707	0	0
ENSDARG00000069321	fam169b	558610	3.91656	30.7203	1.70857	0.000406789	0.00122867
ENSDARG00000060946	pip5kl1	100149843	0	2.25968	0.298856	0.245506
ENSDARG00000069328	si:dkey-12e7.1	557553	364.6	524.386	0.516029	3.22848e-05	0.000115109
ENSDARG00000069329	drgx	560399	0	0
ENSDARG00000074379	knstrn	792608	652.004	677.483	0.0509077	0.581992	0.692528
ENSDARG00000074378	junba	407086	195.024	1531.83	2.87705	6.60946e-97	6.42597e-95
ENSDARG00000074376	CT737192.1		0	0
ENSDARG00000074372	elfn1b	100144401	1.40773	6.5551	0.421451	0.27579	0.391434
ENSDARG00000074371	tirap	403148	11.8242	11.7548	0.0229016	0.960484	0.973991
ENSDARG00000031216	ssu72	393701	1321.91	717.481	-0.871929	5.92717e-25	9.69278e-24
ENSDARG00000031214	arcn1b	399661	3192.82	3459.87	0.116671	0.0486347	0.0921663
ENSDARG00000004635	epha7	562195	3.00826	7.86874	0.407846	0.322664	0.442834
ENSDARG00000004634	osbp	564372	2091.55	1655.12	-0.33301	3.14535e-08	1.61074e-07
ENSDARG00000004636	ccdc9	550140	1123.31	2108.65	0.895626	1.94569e-24	3.11406e-23
ENSDARG00000004633	epn3b	571453	0	0.840011	0.0976532	0.602779
ENSDARG00000004632	egln1b	436868	1374.52	1456.37	0.0840149	0.446566	0.567826
ENSDARG00000042616	sema3h	30252	3.59098	18.3864	1.18669	0.0126678	0.0282757
ENSDARG00000080065	U4		0.296094	0	-0.0595005	0.782557
ENSDARG00000042613	crp3	100141350	40.9649	18.6053	-0.622246	0.199382	0.302065
ENSDARG00000036974	ripply3	654448	8.9891	20.7143	0.815543	0.0684397	0.123677
ENSDARG00000001572	prf1.3	559849	0	0
ENSDARG00000001578	echs1	368912	875.272	905.38	0.0504893	0.533118	0.648179
ENSDARG00000089179	si:dkey-16p6.1		1.60161	2.62601	0.219465	0.624267	0.726796
ENSDARG00000089178	U6		0	0
ENSDARG00000089172	PTPRM		106.01	162.777	0.610286	0.00452998	0.0112684
ENSDARG00000085654	5S_rRNA		0	0
ENSDARG00000089177	cyp46a1.3	692332	0	1.68002	0.165741	0.432193
ENSDARG00000098256	CU914622.1	101882112	0	0
ENSDARG00000098257	pcdh15a	368476	94.1534	79.5828	-0.228193	0.419616	0.5408
ENSDARG00000098254	BX469910.3		0	0
ENSDARG00000098255	U6		0	0.28983	0.0452687	0.838603
ENSDARG00000098252	cpne9	101886563	4.19553	12.1655	0.659249	0.178429	0.276309
ENSDARG00000098253	s1pr3b	100332187	0.234622	2.96286	0.41566	0.208513	0.313611
ENSDARG00000098250	cox7b	563476	1949.36	1510.67	-0.360356	1.49711e-06	6.34907e-06
ENSDARG00000098251	U1		0	0
ENSDARG00000098259	5S_rRNA		0	0.261671	0.0452687	0.838603
ENSDARG00000070019	taf15	558760	17454.8	12310.6	-0.500687	1.16011e-13	9.5056e-13
ENSDARG00000075024	si:ch73-375g18.1	562945	13.1232	44.416	1.25432	0.00356981	0.00909178
ENSDARG00000075025	cdc123	393694	307.185	304.642	-0.0113747	0.933665	0.955321
ENSDARG00000070015	pimr173		0	0
ENSDARG00000070012	sesn2	100149745	1611.41	1678.1	0.0546457	0.401707	0.52296
ENSDARG00000075021	fam120a		1124.63	755.049	-0.576533	4.53781e-10	2.78161e-09
ENSDARG00000075022	si:ch211-93e11.8		2564.19	1569.41	-0.696822	4.98828e-07	2.25285e-06
ENSDARG00000070011	si:ch211-167j6.4		76.7802	55.6468	-0.403854	0.184234	0.283622
ENSDARG00000084529	5S_rRNA		0	0
ENSDARG00000084523	BX537277.3		0	0
ENSDARG00000009702	ascl1b	560440	37.9505	79.6099	0.874031	0.0106678	0.0242519
ENSDARG00000100812	SNORD77		0.296094	0	-0.0595005	0.782557
ENSDARG00000100811	BX927130.2		0	0
ENSDARG00000100816	CT990625.1		0	0
ENSDARG00000100817	FP236812.6		0	0
ENSDARG00000100814	U1		0.897746	0.551502	-0.0478959	0.86505
ENSDARG00000100815	srsf3a	368925	0	0
ENSDARG00000100818	KYAT3	571201	5.89646	4.48455	-0.152628	0.753679	0.828136
ENSDARG00000100819	BX548164.1		0	1.71082	0.233375	0.343401
ENSDARG00000069815	dnali1	567632	4.17371	0.943349	-0.424315	0.267318	0.381783
ENSDARG00000069817	crygm2d8	436854	0	0
ENSDARG00000044511	etv5b	30452	3528.34	3560.51	0.0109914	0.814149	0.873025
ENSDARG00000044512	ca4c	407683	0	0
ENSDARG00000044513	tpst1l	393171	1601.71	1048.5	-0.604977	9.86012e-14	8.14053e-13
ENSDARG00000044514	st6gal1	445376	1783.04	622.969	-1.49886	4.06541e-71	2.65707e-69
ENSDARG00000002701	rasl12	393366	2.88821	12.4912	0.84469	0.081994	0.144167
ENSDARG00000002707	her11	445409	41.2112	38.1143	-0.116705	0.721362	0.804432
ENSDARG00000017681	mapk4	406782	145.448	202.872	0.439247	0.0237462	0.0494352
ENSDARG00000017687	dnajc5gb	393371	217.186	250.48	0.197352	0.243415	0.354484
ENSDARG00000093345	si:ch73-27e22.7	100005035	237.134	83.5791	-1.45048	2.57731e-15	2.42143e-14
ENSDARG00000093347	si:ch211-239f4.6		0.469245	0	-0.109564	0.674215
ENSDARG00000093342	si:ch211-13f8.1		1.2033	0	-0.113212	0.49813
ENSDARG00000093349	si:ch211-141e20.2		0	0
ENSDARG00000093348	CR396590.4		0	0.28983	0.0452687	0.838603
ENSDARG00000082960	SNORD21		0	0
ENSDARG00000082968	dre-mir-429b		0	0
[truncated: 29,542 more rows]

## Sheet: up
Up-regulated genes
geneID	geneName	NCBI_gene_ID	PG_meanCount	PV_meanCount	log2FoldChange	pvalue	padj
ENSDARG00000043213	adam17a	324142	459.972	968.827	1.06367	7.65496e-27	1.3587e-25
ENSDARG00000018096	scap	558292	173.807	390.198	1.0929	2.61389e-08	1.34884e-07
ENSDARG00000013207	zeb1b	114425	2.34622	23.0505	1.46181	0.00300112	0.00775868
ENSDARG00000075450	mkxa	799136	6.3137	116.438	3.48122	3.93927e-18	4.51768e-17
ENSDARG00000051886	ankrd11	327352	2701.95	6139.72	1.1677	2.4724e-30	5.12904e-29
ENSDARG00000075456	pik3ca	561737	127.438	422.357	1.67385	3.3153e-23	4.976e-22
ENSDARG00000078725	nos1apa		7.17179	52.4709	2.22666	5.74136e-08	2.86657e-07
ENSDARG00000044655	st14b	777629	81.4704	206.753	1.24033	1.76583e-07	8.37978e-07
ENSDARG00000067796	clpxb	100332309	82.6807	179.863	1.06555	6.70479e-07	2.99007e-06
ENSDARG00000061797	zgc:154006	563016	0	8.49278	1.19368	0.00175405	0.00474561
ENSDARG00000061794	jam3b	569217	109.338	260.985	1.18373	2.52728e-09	1.43696e-08
ENSDARG00000056394	TOM1L2	100535615	1.17311	23.2771	1.94273	0.000148869	0.000483337
ENSDARG00000004291	hecw1b	563730	74.3991	255.907	1.72289	6.53536e-19	7.81604e-18
ENSDARG00000087646	runx1		0	9.21191	1.43964	0.000570313	0.00168227
ENSDARG00000102406	si:ch211-165e15.1		1.48047	13.0483	1.12968	0.0167516	0.0361803
ENSDARG00000074120	usp2b	564054	1.87698	26.2336	1.74553	0.000453711	0.00136017
ENSDARG00000074129	edem3	559811	536.078	1166.24	1.11519	8.60742e-34	2.01445e-32
ENSDARG00000070809	znf516	100003866	2.36876	35.2389	1.95362	7.03774e-05	0.000239685
ENSDARG00000075296	fam83c	570133	9.59256	29.8766	1.18477	0.00548171	0.0134106
ENSDARG00000042151	skia	30101	34.0921	170.476	2.09891	7.33367e-13	5.66909e-12
ENSDARG00000070110	opn5	564181	1.17311	33.2366	2.48381	2.10169e-06	8.74227e-06
ENSDARG00000009021	chrna1	30725	10.7639	112.042	2.76276	5.34808e-14	4.55589e-13
ENSDARG00000069912	hmga2	324428	0.938489	12.1907	1.27817	0.00854923	0.0198726
ENSDARG00000058738	SLC26A6	557779	0.469245	50.3616	3.48922	1.35299e-08	7.18091e-08
ENSDARG00000016858	smad7	326282	30.6918	181.998	2.27394	1.13491e-15	1.09146e-14
ENSDARG00000033144	psme2	30647	17.1455	66.3579	1.51058	0.000112722	0.000372726
ENSDARG00000025535	clint1a	323870	848.113	1810.16	1.09443	8.00283e-47	2.80271e-45
ENSDARG00000021442	cdh11	30461	20.6602	71.6179	1.50782	8.48728e-06	3.27202e-05
ENSDARG00000096575	si:dkey-182i3.9	103908689	53.876	257.67	2.12611	5.58278e-19	6.70551e-18
ENSDARG00000079760	zgc:112998	541430	7.43003	90.2845	2.76197	2.47423e-12	1.83497e-11
ENSDARG00000012949	scml2	559561	16.6981	84.587	1.61455	0.000282925	0.00087984
ENSDARG00000045408	tagln	751758	17.6519	85.0657	1.81096	9.90309e-07	4.31208e-06
ENSDARG00000015482	zgc:113518	503531	5.59091	26.0469	1.59924	0.000370789	0.00112936
ENSDARG00000040048	GALNTL6	568915	15.3443	115.684	2.64615	2.22706e-17	2.43407e-16
ENSDARG00000056929	kdm6bb	563644	29.2717	158.239	2.20432	2.10593e-16	2.14344e-15
ENSDARG00000070352	hoxc12a	562600	0	8.13839	1.3047	0.00122866	0.00341981
ENSDARG00000021163	thrb	30607	138.61	312.039	1.14975	4.22586e-12	3.06426e-11
ENSDARG00000070681	fam132a	790933	2.35749	22.0684	1.78542	0.000315614	0.000973288
ENSDARG00000070688	ncalda	556178	675.436	1728.91	1.33769	5.12295e-53	2.11655e-51
ENSDARG00000052826	runx3	58127	8.40637	51.2362	2.00765	7.82158e-07	3.44877e-06
ENSDARG00000037478	cdh8	564205	45.4399	161.398	1.73185	2.28376e-12	1.69887e-11
ENSDARG00000071087	slc35b4	323737	160.407	391.48	1.25416	1.00361e-15	9.68464e-15
ENSDARG00000071558	fblim1	768160	0.938489	11.1066	1.22928	0.0115848	0.0261209
ENSDARG00000076685	wisp1b	792714	0	36.2505	3.32228	6.10349e-09	3.34852e-08
ENSDARG00000069661	si:dkey-121j17.6	101886441	10.3059	40.276	1.53124	0.000105123	0.000349135
ENSDARG00000018569	tnfrsf1a	406471	16.2565	61.1013	1.25547	0.0060564	0.014661
ENSDARG00000098502	egr2a		3.96856	19.2758	1.41809	0.00298406	0.00771969
ENSDARG00000069594	kif13a	100331282	359.755	805.396	1.14376	5.58049e-23	8.26792e-22
ENSDARG00000005544	btbd3a	563691	396.975	919.909	1.19655	4.64815e-37	1.2063e-35
ENSDARG00000005541	wif1	30476	2.9988	18.664	1.34256	0.00458061	0.0113828
ENSDARG00000034714	esyt1a	567227	6.13398	28.8795	1.39557	0.00290971	0.00754933
ENSDARG00000009782	myh11a	554168	20.826	199.777	1.16538	0.00786215	0.0184514
ENSDARG00000042690	s1pr1	64617	25.9779	68.9273	1.10348	0.00336596	0.00861865
ENSDARG00000092035	si:ch211-156j16.1	564557	12.5281	42.6913	1.44804	0.000185467	0.000594066
ENSDARG00000008788	camk1gb	393802	9.77517	54.9896	2.00159	1.427e-07	6.85506e-07
ENSDARG00000087822	agap3		26.9175	86.8118	1.20753	0.00522316	0.0128375
ENSDARG00000040453	wdfy2	492636	253.278	604.715	1.21631	1.73963e-20	2.28929e-19
ENSDARG00000045803	mfge8b	558580	42.8561	293.867	2.62568	4.72366e-32	1.0466e-30
ENSDARG00000013414	lin7a	393682	17.366	75.5148	1.82198	2.98977e-08	1.53309e-07
ENSDARG00000078311	dcaf6	564498	336.476	697.138	1.02272	2.50649e-19	3.09229e-18
ENSDARG00000091006	cobl	497312	15.8648	51.2152	1.3306	0.000661278	0.00193116
ENSDARG00000022904	skilb	100170835	30.9053	425.005	3.57145	4.74729e-59	2.34272e-57
ENSDARG00000103923	tfap4	100318080	194.691	403.906	1.00639	3.133e-11	2.11778e-10
ENSDARG00000099351	igfbp1a	317638	27.2754	101.58	1.67337	4.8291e-08	2.43097e-07
ENSDARG00000096365	si:ch211-195m9.3	100332163	102.682	293.866	1.4769	4.56342e-19	5.52189e-18
ENSDARG00000007807	cyth3a	100002190	13.9358	36.3819	1.00066	0.0235618	0.0491141
ENSDARG00000102334	si:ch211-124n19.2		117.062	248.673	1.05425	2.79431e-08	1.43728e-07
ENSDARG00000026811	extl3	493783	262.962	565.266	1.06686	5.52255e-16	5.44234e-15
ENSDARG00000060152	fam155b	791161	23.1915	82.0348	1.61568	9.81523e-08	4.77851e-07
ENSDARG00000060153	h6pd	569348	90.1616	208.108	1.15986	2.95716e-09	1.6702e-08
ENSDARG00000038909	msl2a	564400	334.682	690.686	1.02645	1.32801e-17	1.47287e-16
ENSDARG00000100400	FO704610.1		117.845	566.12	2.15821	4.41521e-32	9.80478e-31
ENSDARG00000100403	CT027704.1		0	11.2583	1.66262	0.000154226	0.000499234
ENSDARG00000069411	cx34.5	565892	46.4427	625.319	3.58691	2.19906e-75	1.5239e-73
ENSDARG00000030598	nampta	100330160	24.1424	156.135	2.37962	5.64891e-17	5.98974e-16
ENSDARG00000101759	homer1b	436769	0	17.3798	1.96441	1.65353e-05	6.11878e-05
ENSDARG00000074414	sema4ba	572261	3.66481	29.5129	1.75261	0.000291849	0.000905856
ENSDARG00000051809	btr12	767681	136.974	367.431	1.00416	0.0238896	0.0497073
ENSDARG00000002210	stk25a	449653	69.0912	216.505	1.57541	2.02442e-14	1.78929e-13
ENSDARG00000095034	zgc:162928	557144	212.553	431.29	1.002	3.83576e-13	3.01887e-12
ENSDARG00000088342	tmem145	557826	8.38745	51.2109	1.95655	1.90867e-06	7.98185e-06
ENSDARG00000044380	rbmx2	553240	548.062	1105.59	1.00326	8.50531e-21	1.13921e-19
ENSDARG00000058207	abi2a	767646	209.307	503.611	1.24661	3.50738e-19	4.2865e-18
ENSDARG00000058202	pex16	573990	216.281	442.65	1.00153	9.03817e-14	7.48801e-13
ENSDARG00000041609	adarb1a	58134	3.77649	48.5822	2.51507	2.98182e-08	1.52942e-07
ENSDARG00000023448	galnt14	562739	13.3265	40.6317	1.26542	0.00108661	0.00305446
ENSDARG00000061177	mov10b.1	556024	23.7808	86.8953	1.68504	1.23406e-07	5.95015e-07
ENSDARG00000079317	DLC1	567965	68.3313	262.869	1.74345	7.53961e-11	4.9426e-10
ENSDARG00000063153	bcl11ab	566491	8.88797	47.9165	1.61652	0.000351026	0.00107368
ENSDARG00000063155	dcaf12	570671	691.457	1872.93	1.41423	2.34843e-52	9.58101e-51
ENSDARG00000026499	ppm1e	553417	0	6.75485	1.06251	0.00441002	0.0110022
ENSDARG00000005332	lipib		0	8.14505	1.18866	0.00196122	0.00525592
ENSDARG00000054906	ier5l	326935	68.3251	197.205	1.44567	5.65839e-11	3.74327e-10
ENSDARG00000006514	her6	30288	51.2104	156.552	1.51458	3.20098e-11	2.16149e-10
ENSDARG00000052435	spred2a	558432	0.469245	16.309	1.86893	0.0003647	0.00111203
ENSDARG00000063905	mt-co1	140539	4718.92	48391.6	3.34025	0	0
ENSDARG00000003041	CABZ01111496.1		17.3435	67.1509	1.59542	1.24755e-05	4.68567e-05
ENSDARG00000032327	usp36	327239	1692.83	3842.85	1.17762	4.45382e-105	4.97351e-103
ENSDARG00000069998	si:ch211-145b13.6	100317105	6.65234	20.4739	1.07758	0.0205726	0.0434532
ENSDARG00000008372	spred2b	793290	31.2734	76.6821	1.12402	0.000285536	0.000887397
ENSDARG00000069995	dpy19l1l	368327	7.71486	42.7131	1.59513	0.000543558	0.0016096
ENSDARG00000076735	si:dkey-193c22.2	101882096	2.79545	50.4786	2.81982	4.533e-09	2.51017e-08
ENSDARG00000032816	tm7sf2	494054	3.5306	20.1254	1.34753	0.00617723	0.0149253
ENSDARG00000045955	prlrb	561846	0	11.8446	1.67896	0.000130624	0.000427797
ENSDARG00000041065	hspb1	368243	44.7814	95.8588	1.00487	0.000160576	0.000518759
ENSDARG00000045485	rassf8b	393334	2.36876	41.383	2.19152	8.77693e-06	3.37502e-05
ENSDARG00000094557	nupr1	799637	44.9233	528.516	3.41914	5.0409e-71	3.28364e-69
ENSDARG00000078600	ldlrad3	570705	4.18317	29.6364	1.69122	0.000400302	0.0012102
ENSDARG00000099985	cyr61l2	553273	0	9.60508	1.47049	0.000462859	0.00138581
ENSDARG00000099871	myo7aa	252846	0.938489	148.421	4.88476	3.39858e-18	3.91829e-17
ENSDARG00000059746	plod1a	777635	1.17311	28.2436	2.29322	1.10452e-05	4.18224e-05
ENSDARG00000097205	ulk2	100329702	11.4365	101.536	2.65937	2.84924e-14	2.49462e-13
ENSDARG00000063914	mt-nd3	140533	74.1379	1472.92	4.23537	3.50057e-215	8.77026e-213
ENSDARG00000061690	nxpe3	564277	593.114	1495.22	1.31657	1.59042e-60	8.11485e-59
ENSDARG00000056742	crmp1	553756	0.703867	30.4174	2.6556	2.18475e-06	9.06269e-06
ENSDARG00000021250	slc25a48	436640	12.4702	33.1587	1.0642	0.0117358	0.0264096
ENSDARG00000021255	arhgap22	562503	0.938489	11.5521	1.15448	0.0145028	0.0318263
ENSDARG00000056294	SBK1	559792	6.23511	45.3263	2.05697	3.40396e-06	1.37537e-05
ENSDARG00000094965	nfil3-5	335737	67.7667	248.231	1.72972	6.31998e-14	5.335e-13
ENSDARG00000071005	ppp1r3ca	436649	188.021	556.938	1.53329	8.31524e-33	1.8764e-31
ENSDARG00000022509	cox4i2	393776	11.6718	53.2894	1.81915	3.06796e-06	1.24645e-05
ENSDARG00000105276	grb2a	493609	66.6962	263.968	1.85626	8.44911e-19	1.00556e-17
ENSDARG00000033307	igf2b	324215	34.684	97.7048	1.23813	0.000284736	0.000885331
ENSDARG00000006894	oprk1	360139	0	6.85819	1.11609	0.00348347	0.00889506
ENSDARG00000038467	igsf8	404631	206.688	435.932	1.07206	1.16942e-12	8.89212e-12
ENSDARG00000101034	ZC3H12A	563108	6.94952	40.6556	1.66606	0.00027825	0.000866267
ENSDARG00000103892	CABZ01074203.1	100332902	6.1027	70.9174	2.77308	4.4146e-12	3.19519e-11
ENSDARG00000069321	fam169b	558610	3.91656	30.7203	1.70857	0.000406789	0.00122867
ENSDARG00000074378	junba	407086	195.024	1531.83	2.87705	6.60946e-97	6.42597e-95
ENSDARG00000042616	sema3h	30252	3.59098	18.3864	1.18669	0.0126678	0.0282757
ENSDARG00000075024	si:ch73-375g18.1	562945	13.1232	44.416	1.25432	0.00356981	0.00909178
ENSDARG00000014796	wnt11r	30283	0	6.94959	1.05945	0.00425429	0.0106477
ENSDARG00000090901	si:ch211-256e16.11		0	9.42525	1.44525	0.000536904	0.00159189
ENSDARG00000059233	runx2b	405788	21.5474	70.7524	1.48817	7.7089e-06	2.98726e-05
ENSDARG00000075853	sh3kbp1	793623	262.328	533.693	1.00046	1.16873e-14	1.05153e-13
ENSDARG00000077569	lrrn3a	101887059	7.74216	26.8945	1.18902	0.0109646	0.0248574
ENSDARG00000090062	rac3a	437027	0	7.11986	1.16101	0.0027439	0.00715905
ENSDARG00000012248	rgma	414272	4.01111	39.7906	2.0702	1.23354e-05	4.63752e-05
ENSDARG00000074033	adamtsl2	100537087	4.07258	37.8192	2.08454	7.48698e-06	2.90645e-05
ENSDARG00000020057	bmpr2b	555655	11.2556	81.6175	2.34219	1.31491e-10	8.44432e-10
ENSDARG00000077465	sorcs2	100330371	7.3573	32.2451	1.26732	0.00805744	0.0188505
ENSDARG00000093629	si:ch211-106h4.4		3.8267	26.0405	1.51	0.00206566	0.00551538
ENSDARG00000056152	fam3c	334205	169.899	370.79	1.07026	3.04517e-10	1.89518e-09
ENSDARG00000057826	si:ch73-61d6.3	100001136	27.1103	139.934	1.99259	2.44914e-09	1.39374e-08
ENSDARG00000102885	rsu1		36.2113	141.511	1.59637	1.58981e-05	5.89082e-05
ENSDARG00000102884	si:ch211-145h19.5		0	6.64222	1.11572	0.00368833	0.00935582
ENSDARG00000052701	smpd2b	797914	261.257	564.762	1.07657	3.16697e-14	2.76166e-13
ENSDARG00000052705	pkp1b	797838	6.75456	27.4854	1.45541	0.000850126	0.00243381
ENSDARG00000087084	hcar1-4	100329613	6.12271	26.546	1.25744	0.0085233	0.0198197
ENSDARG00000018441	heg1	406202	3.30725	23.8905	1.64169	0.000739887	0.00214079
ENSDARG00000077768	malt1	561914	6.10089	39.6373	1.95826	7.80558e-06	3.02113e-05
ENSDARG00000102572	si:ch211-260e23.9	555795	21.6852	54.4408	1.06364	0.00686646	0.0163919
ENSDARG00000002165	psme1	30648	37.4445	97.3772	1.18251	0.000176983	0.000568194
ENSDARG00000074231	SLC9A3R2	100535100	3.30725	24.1777	1.65328	0.000669445	0.00195286
ENSDARG00000074235	CR376783.1	797620	9.62564	71.9925	1.98057	9.86179e-06	3.76405e-05
ENSDARG00000004406	spra	554136	17.49	57.5538	1.32943	0.000556233	0.00164496
ENSDARG00000014340	rab11al	386994	312.179	740.162	1.21582	2.46199e-24	3.92112e-23
ENSDARG00000043821	klf7b	553082	165.527	371.495	1.11803	4.93194e-11	3.27712e-10
ENSDARG00000061243	ubash3ba	558545	156.871	338.117	1.06736	9.08272e-12	6.40775e-11
ENSDARG00000061242	tuft1a	562692	10.6533	48.5525	1.40941	0.00231356	0.00612127
ENSDARG00000010145	tor4aa	550133	10.6635	38.1534	1.38996	0.000735886	0.00213146
ENSDARG00000021539	ephb2b	554232	266.55	889.796	1.70269	2.61335e-40	7.55475e-39
ENSDARG00000045530	si:ch211-244b2.4	541512	35.6516	91.9378	1.17504	0.000148817	0.000483246
ENSDARG00000007461	srgap1a	570262	159.685	393.534	1.24907	9.88582e-14	8.15831e-13
ENSDARG00000056587	cyp2r1	563369	214.868	488.12	1.1289	4.72527e-12	3.40868e-11
ENSDARG00000057678	sfrp1b	798564	0	12.9383	1.82585	5.87581e-05	0.000202192
ENSDARG00000063612	antxr1c	563907	54.6712	403.575	2.70869	2.05377e-40	5.95471e-39
ENSDARG00000069281	pimr109	560132	0	12.8644	1.8492	5.40475e-05	0.00018707
ENSDARG00000014939	KCNN2	564698	10.5423	38.3491	1.33063	0.0023528	0.00621583
ENSDARG00000077487	spsb3b	100005459	2.35749	13.0804	1.19408	0.0165205	0.0357167
ENSDARG00000030236	tmem30aa	337397	98.6949	236.468	1.19227	1.12123e-10	7.23619e-10
ENSDARG00000098941	CU856520.1		10.7231	31.8368	1.16634	0.00604282	0.0146331
ENSDARG00000088428	si:ch211-189a15.5	100149436	64.3766	162.65	1.24142	2.36158e-07	1.10592e-06
ENSDARG00000042233	fgf16	692065	13.1628	46.9503	1.49639	6.25206e-05	0.000214347
ENSDARG00000087956	she	561493	11.7438	30.023	1.02281	0.0137071	0.0303048
ENSDARG00000023323	ywhaqb	335195	266.368	986.332	1.83865	3.26676e-56	1.46757e-54
ENSDARG00000040695	fkbp14	445077	395.481	808.093	1.01497	1.86634e-21	2.59957e-20
ENSDARG00000057477	lrrc28	555592	15.5901	124.511	2.69756	4.10923e-17	4.42195e-16
ENSDARG00000090195	mtx3	402916	58.6583	238.848	1.92529	5.31089e-19	6.39466e-18
ENSDARG00000078401	larp4aa	797570	377.912	988.74	1.34573	1.3143e-24	2.12264e-23
ENSDARG00000019969	smarcd3b	562140	45.3543	126.786	1.34902	6.70691e-06	2.62028e-05
ENSDARG00000051955	brms1	791681	41.6088	143.181	1.59238	2.8545e-09	1.61455e-08
ENSDARG00000037607	nol4lb	791170	17.7046	60.1112	1.42622	0.000126565	0.000415338
ENSDARG00000056467	tmub2	368511	25.9314	64.7034	1.11019	0.00215389	0.00573451
ENSDARG00000039196	greb1l	100005373	79.6698	274.466	1.65062	2.86451e-14	2.50574e-13
ENSDARG00000102023	phf13	100537300	51.0017	132.211	1.2509	3.2664e-06	1.32267e-05
ENSDARG00000102027	CU467646.6	101884439	116.336	265.686	1.12334	1.14049e-09	6.72727e-09
ENSDARG00000088225	STRADB	100536950	136.647	363.33	1.38209	5.25866e-16	5.19014e-15
ENSDARG00000035990	cited4a	562291	226.248	594.659	1.36073	3.44208e-24	5.42898e-23
ENSDARG00000010408	igsf9b	553348	236.421	1099.61	2.13131	9.1688e-39	2.50597e-37
ENSDARG00000068760	tnks1bp1	497601	98.8328	500.57	2.25596	4.02766e-33	9.24894e-32
ENSDARG00000076673	DSP	327364	179.155	556.26	1.57512	6.18452e-23	9.12824e-22
ENSDARG00000076679	rai1	101885257	63.3023	140.898	1.07549	7.56782e-06	2.93608e-05
ENSDARG00000058857	zgc:112052	550358	26.7127	167.405	2.3977	3.23542e-20	4.18442e-19
ENSDARG00000100531	abhd14b	393338	0	12.3036	1.72359	9.94123e-05	0.000331295
ENSDARG00000104400	socs3a	103909359	49.6478	675.455	3.6358	2.13036e-101	2.20272e-99
ENSDARG00000073757	pdzrn3a	100149029	0.469245	35.5813	2.64582	2.31761e-06	9.58532e-06
ENSDARG00000035175	schip1	550605	14.1126	76.567	2.00925	5.16184e-08	2.59246e-07
ENSDARG00000098751	lzts3a	795227	1.99992	14.241	1.29486	0.00954169	0.0219266
ENSDARG00000075349	si:ch73-138n13.1	504038	1020.84	2102.33	1.03004	4.86143e-44	1.59132e-42
ENSDARG00000078523	ddr1	100007346	46.849	155.363	1.38141	0.00024363	0.000765437
ENSDARG00000075346	tmem129	406756	54.8037	246.075	2.0628	1.44119e-19	1.8019e-18
ENSDARG00000012823	dlgap4b	569107	15.246	40.2196	1.03564	0.010911	0.0247416
ENSDARG00000012824	itga3b	100331874	16.4912	322.324	1.7419	6.99195e-05	0.00023825
ENSDARG00000044813	vps33b	541534	98.3283	211.136	1.05705	1.61626e-07	7.71304e-07
ENSDARG00000099930	col27a1b	560145	15.2111	67.5385	1.74943	2.17907e-06	9.04106e-06
ENSDARG00000012593	col5a1	100334431	27.8563	99.5299	1.63636	1.14699e-08	6.12922e-08
ENSDARG00000061379	cmya5	560687	0	8.45506	1.35662	0.000936835	0.00266332
ENSDARG00000071692	prex2	557288	4.71498	26.5447	1.52487	0.00129787	0.00359503
ENSDARG00000103201	CT583728.16		45.8494	128.782	1.37068	1.72669e-06	7.26593e-06
ENSDARG00000105333	fbn1		1.17311	41.2607	2.84066	7.27821e-08	3.59441e-07
ENSDARG00000062195	fbxo31	555190	40.8754	129.951	1.50684	5.35019e-09	2.95098e-08
ENSDARG00000036830	krt91	445051	33.3687	100.768	1.43977	5.57333e-06	2.19895e-05
ENSDARG00000035569	cyp1d1	492344	50.058	194.499	1.84788	2.08383e-15	1.97298e-14
ENSDARG00000089342	wu:fc75a09	100000768	2.14179	25.2833	2.08369	3.05714e-05	0.000109339
ENSDARG00000009194	COL16A1	100535782	22.0279	78.8842	1.63649	1.64762e-07	7.85503e-07
ENSDARG00000068483	neto1		2.88821	22.0038	1.67606	0.000607673	0.00178735
ENSDARG00000093420	creb1b	550516	59.543	217.394	1.78992	1.03269e-17	1.15122e-16
ENSDARG00000032039	mxd1	570082	1.40773	12.4633	1.14403	0.0181513	0.0388541
ENSDARG00000075954	serpinh1a	555328	12.1225	238.27	1.93288	1.97092e-05	7.22253e-05
ENSDARG00000074773	si:dkey-110g7.8	100150205	9.3674	45.4837	1.74402	1.963e-05	7.19719e-05
ENSDARG00000098655	KIF1C	570771	86.3459	247.218	1.43291	2.65006e-13	2.11291e-12
ENSDARG00000040284	si:dkey-79d12.5	100538016	119.172	337.168	1.39381	6.23163e-11	4.10859e-10
ENSDARG00000019442	AMOTL1	101884950	13.7237	36.7334	1.14331	0.00361332	0.00919302
ENSDARG00000055505	pdgfaa	378480	2.29602	88.193	3.67585	3.26222e-15	3.03862e-14
ENSDARG00000070441	zdhhc17	100148543	142.961	354.206	1.21877	9.17808e-09	4.95738e-08
ENSDARG00000021677	phf11	569187	16.4693	73.4803	1.67435	1.77265e-05	6.5336e-05
ENSDARG00000029461	cd209	100334918	10.1506	95.0488	2.62717	8.09833e-11	5.29821e-10
ENSDARG00000104295	arhgap21a	556095	19.9894	55.462	1.11499	0.00538569	0.0131988
ENSDARG00000076847	tnrc6c1	560874	72.9732	324.516	1.99211	5.52061e-19	6.63492e-18
ENSDARG00000060927	si:ch211-136a13.1		19.786	151.227	2.49988	3.07819e-15	2.87406e-14
ENSDARG00000087636	hmgn6	100151347	18.7548	99.9097	2.05101	4.1063e-10	2.5306e-09
ENSDARG00000103411	CT583728.18		45.8494	128.782	1.37068	1.72669e-06	7.26593e-06
ENSDARG00000101818	BX294178.1		7.35621	43.6009	1.97405	1.82731e-06	7.66131e-06
ENSDARG00000036571	sema3e	565658	104.301	278.932	1.37744	7.19579e-15	6.53743e-14
ENSDARG00000068800	BX548044.1		8.72609	31.5592	1.16616	0.0122643	0.0274629
ENSDARG00000077409	cby1	326875	67.0119	169.429	1.26315	3.71003e-09	2.06969e-08
ENSDARG00000077404	ncoa3	564519	481.336	993.641	1.0275	3.37868e-25	5.60493e-24
ENSDARG00000077407	si:dkey-184p18.2	768134	140.631	424.583	1.53953	2.89076e-23	4.35553e-22
ENSDARG00000037196	ARID5B	100536827	12.4779	49.1593	1.64872	1.16031e-05	4.38138e-05
ENSDARG00000102436	si:ch211-194b1.1	100001879	8.75267	43.8507	1.53814	0.00079349	0.00228405
ENSDARG00000032653	fam60a	563991	6.83785	79.8567	2.6481	9.03029e-11	5.87841e-10
ENSDARG00000032650	fuk	100150934	91.7629	240.188	1.35194	2.37271e-11	1.61954e-10
ENSDARG00000074170	fbxo4	100319387	27.929	75.4513	1.2317	0.000205362	0.000654146
ENSDARG00000031100	ivns1abpa	387591	132.127	538.131	1.92745	4.94939e-28	9.2203e-27
ENSDARG00000034883	acbd5a	553674	569.396	1198.08	1.05839	3.09743e-24	4.90122e-23
ENSDARG00000010816	slc7a14a	566270	85.2066	238.945	1.41448	2.02975e-14	1.79319e-13
ENSDARG00000098497	hrasa	550286	136.639	282.319	1.00424	3.81994e-08	1.94298e-07
ENSDARG00000091287	ebf3b	556476	0.703867	14.7939	1.57774	0.00171027	0.00463615
ENSDARG00000068227	tmem150aa	751697	16.613	49.1779	1.2126	0.0015815	0.00431341
ENSDARG00000017047	slc27a4	550432	70.6258	174.375	1.20402	6.52804e-08	3.23866e-07
ENSDARG00000017591	fat1a	406172	23.7044	271.949	3.16095	1.228e-34	2.98107e-33
ENSDARG00000079280	dhrsx		49.463	156.292	1.57265	7.17642e-10	4.30718e-09
ENSDARG00000079283	si:ch211-247j9.1	570019	1.64236	22.3407	1.70667	0.000663699	0.00193785
ENSDARG00000016494	ddc	406651	22.0206	519.94	4.0477	1.31321e-47	4.70013e-46
ENSDARG00000079751	megf8	791154	346.156	1088.64	1.61999	2.3255e-44	7.65067e-43
ENSDARG00000099199	itchb		134.779	283.274	1.0408	4.7439e-10	2.90232e-09
ENSDARG00000099195	ier2	797137	76.7391	352.557	2.06686	8.28718e-26	1.40215e-24
ENSDARG00000099227	galnt13	100330695	239.723	613.107	1.29315	4.46268e-15	4.10979e-14
ENSDARG00000056978	letm1	570745	235.244	547.713	1.17889	2.64159e-19	3.25281e-18
ENSDARG00000057737	rxraa	555578	37.9861	130.17	1.64629	3.47603e-10	2.15305e-09
ENSDARG00000102970	TMEM150A	103911695	53.545	116.319	1.05245	5.217e-05	0.000180956
ENSDARG00000104483	gipc1	445568	35.8593	90.4766	1.20781	0.000252183	0.000790403
ENSDARG00000039966	prom1a	322857	374.552	836.053	1.11354	1.28857e-08	6.85574e-08
ENSDARG00000105285	CABZ01069287.1	101882648	7.58137	30.9018	1.46181	0.000697744	0.00202816
ENSDARG00000031809	rbm24b	562236	22.1679	80.5307	1.65807	3.89427e-07	1.78141e-06
ENSDARG00000098865	BX548044.8		6.35733	29.7424	1.33298	0.00504428	0.0124291
ENSDARG00000098867	PRDM15		148.09	368.355	1.22512	4.35311e-09	2.41329e-08
ENSDARG00000002582	tbx15	246222	7.23217	22.1409	1.06189	0.0239232	0.0497666
ENSDARG00000091555	ostf1	405783	324.073	861.194	1.39207	1.71776e-36	4.39955e-35
ENSDARG00000098288	tax1bp1a	561219	171.547	449.115	1.36378	1.31249e-19	1.64521e-18
ENSDARG00000075618	slc36a1	559308	52.3621	173.944	1.59514	9.72764e-12	6.8479e-11
ENSDARG00000045676	calua	415241	338.204	850.905	1.30839	1.15889e-37	3.06871e-36
ENSDARG00000079611	sema4c	561895	38.6522	88.0987	1.05539	0.00021085	0.000670424
ENSDARG00000036865	slc2a12	393510	105.464	258.91	1.25773	2.70812e-12	2.00159e-11
ENSDARG00000087857	si:ch211-180a12.2	100150385	14.8656	40.9725	1.20309	0.00222992	0.00591999
ENSDARG00000099428	si:dkey-15h8.17	100034454	2.09159	13.4146	1.27505	0.00820261	0.0191604
ENSDARG00000019235	sema3aa	30266	100.576	239.277	1.14618	5.42148e-07	2.43935e-06
ENSDARG00000015722	kctd5a	322008	143.516	306.195	1.06347	9.16685e-10	5.45655e-09
ENSDARG00000028628	gdap1l1	562163	25.365	75.4358	1.06349	0.0181499	0.0388541
ENSDARG00000020795	rac3b	795167	4.65351	24.1575	1.39014	0.003776	0.00955713
ENSDARG00000103914	THEM6	100142654	38.6133	83.592	1.00387	0.00252749	0.00663695
ENSDARG00000026137	sfxn5b	561995	3.1843	156.846	4.39392	9.34139e-27	1.65203e-25
ENSDARG00000060184	pkn1a	560840	13.2425	66.0959	1.82896	2.26646e-06	9.38373e-06
ENSDARG00000062965	fam45a	556203	338.738	766.475	1.14241	1.21122e-20	1.60147e-19
ENSDARG00000062960	armc10	557740	175.95	396.192	1.15007	1.55737e-12	1.1737e-11
ENSDARG00000036252	rras2	550513	27.1517	71.6138	1.1497	0.00127066	0.00352667
ENSDARG00000088073	fam110b	573995	453.409	915.034	1.00233	1.49091e-24	2.40391e-23
ENSDARG00000038956	fdx1b	562135	50.5877	151.185	1.48175	1.5835e-08	8.35667e-08
ENSDARG00000103129	nid1b		16.8146	111.426	2.3403	7.85053e-13	6.05427e-12
ENSDARG00000100470	BX004768.1		0	6.84757	1.11619	0.0034942	0.00892013
ENSDARG00000100473	kndc1	799007	3.63173	34.8039	2.29872	8.10887e-07	3.57222e-06
ENSDARG00000000241	slc40a1	58153	33.2119	146.707	1.92349	4.63688e-13	3.63328e-12
ENSDARG00000033614	rasgef1ba	327572	1054.38	2807.99	1.40563	3.02173e-93	2.79861e-91
ENSDARG00000077139	col6a3		69.1726	220.561	1.53732	2.3751e-11	1.62061e-10
ENSDARG00000069440	dachd	791191	16.6981	63.0112	1.27007	0.00532072	0.0130494
ENSDARG00000042515	gpr176	561969	23.3599	78.0656	1.40235	0.000121285	0.000399283
ENSDARG00000077791	brsk2b	100149571	97.1847	313.186	1.56458	1.09634e-12	8.35925e-12
ENSDARG00000089066	nhsl2	794153	39.2909	150.256	1.77744	5.60303e-13	4.36233e-12
ENSDARG00000078778	lrch1	560885	108.775	388.399	1.72122	1.13262e-16	1.17047e-15
ENSDARG00000040200	BX465228.1		5.21442	25.7719	1.51139	0.00119342	0.00332882
ENSDARG00000044915	sfmbt1	100001629	554.437	1536.68	1.45705	9.66452e-71	6.25377e-69
ENSDARG00000011141	dpysl5a	324416	19.0705	71.7223	1.59125	1.45469e-05	5.41992e-05
ENSDARG00000019371	flt1	544667	1.48047	34.1707	2.3694	3.66184e-06	1.47333e-05
ENSDARG00000079423	npbwr2a	556451	2.58084	23.0585	1.387	0.00470164	0.0116524
ENSDARG00000006350	nkx1.2la	405755	6.51047	24.9144	1.31108	0.00359271	0.00914413
ENSDARG00000012729	hcls1	563056	11.6256	47.8708	1.34268	0.00329565	0.00845081
ENSDARG00000056050	kctd17	568267	68.8326	170.47	1.25351	4.98378e-07	2.25134e-06
ENSDARG00000021366	fbp1a	335231	58.0585	125.896	1.04186	2.893e-05	0.000103772
ENSDARG00000061143	tapt1b	559710	278.729	585.983	1.04175	1.59469e-17	1.75568e-16
ENSDARG00000060438	tbl1x	560294	287.469	965.263	1.19063	0.00863355	0.0200352
ENSDARG00000026753	grik4	556582	97.7761	271.797	1.42279	9.08384e-17	9.44059e-16
ENSDARG00000023989	pef1	445249	302.79	658.14	1.0959	3.08967e-20	4.00122e-19
ENSDARG00000100679	lrch3	100126105	76.1916	217.411	1.42847	3.57184e-11	2.39865e-10
ENSDARG00000100677	tmem205	791204	212.293	564.404	1.38666	6.93488e-29	1.34981e-27
ENSDARG00000056877	vamp2	336281	1.77657	19.881	1.52208	0.00190076	0.00510861
ENSDARG00000003820	nr1d2a	402815	72.6395	299.521	1.93605	1.32121e-22	1.92536e-21
ENSDARG00000038559	h1f0	321618	25.8764	112.769	1.86678	1.8909e-10	1.19354e-09
ENSDARG00000030723	cldn11b	81592	60.3272	137.291	1.13359	4.78842e-07	2.1666e-06
ENSDARG00000104773	junbb	336038	252.307	1550.81	2.55741	4.7285e-89	4.12519e-87
ENSDARG00000039605	mat1a	334195	0	7.21126	1.08314	0.00364338	0.00925631
ENSDARG00000007231	ryk	558502	601.37	1401.41	1.20897	1.75254e-45	5.98745e-44
ENSDARG00000005897	dera	450077	111.336	289.906	1.30622	3.03311e-12	2.23419e-11
ENSDARG00000089886	si:dkey-19e4.5	570260	406.788	879.447	1.11046	3.31917e-27	5.96717e-26
ENSDARG00000089888	daglb	565287	154.008	448.984	1.42296	1.43797e-09	8.40588e-09
ENSDARG00000071212	p3h1	553321	6.88805	54.6263	1.95915	1.89169e-05	6.95138e-05
ENSDARG00000008329	asic1a	791696	9.45654	58.6679	1.88053	1.69893e-05	6.27964e-05
ENSDARG00000086421	si:ch211-212k18.8	100001422	5.35737	27.4936	1.3762	0.00422033	0.0105681
ENSDARG00000016809	prkacab	445076	17.7661	129.438	2.49777	4.28001e-16	4.25e-15
ENSDARG00000030440	rsrp1	724003	483.049	1032.21	1.08297	2.61853e-26	4.52443e-25
ENSDARG00000074635	abca1a	558924	126.212	335.103	1.31092	3.09739e-10	1.924e-09
ENSDARG00000079201	TSHZ2	100332862	74.928	316.545	2.02173	2.74149e-30	5.67523e-29
ENSDARG00000014986	acvr1l	30615	1248.34	2598.28	1.06016	3.11036e-57	1.46818e-55
ENSDARG00000099805	CABZ01115396.1	100332847	1.17311	17.1867	1.53752	0.00200005	0.00534897
ENSDARG00000099807	dre-mir-202		0.938489	12.6753	1.3423	0.00632035	0.0152296
ENSDARG00000053311	tespa1	100332241	6.17363	53.7952	2.42949	3.83084e-09	2.13526e-08
ENSDARG00000056795	serpine1	100136840	570.786	4974.02	3.08083	9.62343e-293	4.0013e-290
ENSDARG00000056793	JAZF1	572950	60.9121	145.858	1.15883	5.38171e-07	2.42326e-06
ENSDARG00000090787	klhdc8b	799189	3.07262	19.088	1.39605	0.00458244	0.0113859
ENSDARG00000021287	zgc:91909	431725	13.7048	39.7016	1.1973	0.00298519	0.00772159
ENSDARG00000069169	cerk	558496	112.813	321.836	1.42625	5.25123e-13	4.09986e-12
ENSDARG00000056244	zgc:171740	795694	0	11.3133	1.68075	0.000142462	0.000463844
ENSDARG00000057113	c6	393611	30.7543	79.6795	1.07554	0.00448184	0.0111615
ENSDARG00000071051	cbx6a	799294	125.68	314.985	1.29506	7.75814e-15	7.03524e-14
ENSDARG00000071055	ZNF512B	101885988	15.0482	37.5129	1.08469	0.00592345	0.0143671
ENSDARG00000104152	CABZ01054391.1	100149554	114.182	267.998	1.17301	8.66178e-09	4.69538e-08
ENSDARG00000071586	tgfbi	321421	14.899	217.619	1.6614	0.000242809	0.000763226
ENSDARG00000018688	elk3	557074	7.47915	23.6209	1.18225	0.0081435	0.0190314
ENSDARG00000063555	si:ch211-166g5.4	100150156	11.4903	30.7298	1.05171	0.0116837	0.0263106
ENSDARG00000087176	sgk494a	101883587	2.07266	35.9513	2.14489	1.58662e-05	5.88009e-05
ENSDARG00000018534	slc6a9	494490	3.07262	18.3476	1.14319	0.0191454	0.0407205
ENSDARG00000076585	si:ch211-113e8.11	569198	165.259	498.619	1.5634	1.0044e-28	1.92998e-27
ENSDARG00000074345	si:ch211-214b16.4		5.25696	28.4758	1.44646	0.00252798	0.00663735
ENSDARG00000004643	cdhr1a	449008	2.34622	19.3738	1.25719	0.00995671	0.0227637
ENSDARG00000088581	f10	282670	33.6556	168.393	1.93792	1.5546e-08	8.21078e-08
ENSDARG00000042667	klf2a	117508	104.375	243.985	1.18363	1.07818e-11	7.56546e-11
ENSDARG00000070045	celf4		1.77476	15.8472	1.43971	0.00361272	0.00919269
ENSDARG00000008485	lrp3	100170796	51.5611	114.496	1.0757	0.000330757	0.00101566
ENSDARG00000040156	grm4	567181	79.9081	204.121	1.26728	5.80896e-09	3.19321e-08
ENSDARG00000059202	tspan2b	101883842	1.40773	26.1125	1.9937	8.92927e-05	0.000299461
ENSDARG00000077081	slc38a10	561739	752.894	1637.61	1.11586	2.73603e-26	4.71911e-25
ENSDARG00000025428	socs3a	335409	49.6478	675.979	3.63678	2.45265e-101	2.50941e-99
ENSDARG00000021735	cacna1ba	555941	10.7126	43.2614	1.62443	6.06816e-05	0.000208481
ENSDARG00000012271	tmem206	393429	32.9827	99.0145	1.46105	7.66897e-07	3.38682e-06
ENSDARG00000005414	grapa	553596	12.4695	54.8754	1.65806	1.77767e-05	6.55086e-05
ENSDARG00000039255	klhl21	404613	74.4816	255.976	1.69721	3.77817e-19	4.60305e-18
ENSDARG00000055436	ftr97	100150342	28.1629	96.745	1.5067	4.07964e-06	1.63135e-05
ENSDARG00000053104	fam102ba	724011	18.6631	61.5232	1.34433	0.000428351	0.00128901
ENSDARG00000054454	epha4a	64271	23.237	90.2205	1.58691	1.22947e-05	4.6231e-05
ENSDARG00000054456	clip3	562450	0	13.1638	1.71806	8.69596e-05	0.000292339
ENSDARG00000103700	si:ch211-239d6.2		0	16.2834	2.13241	9.64553e-06	3.68871e-05
ENSDARG00000076934	wdr60	100330581	293.985	691.902	1.20793	5.67406e-26	9.6756e-25
ENSDARG00000053484	syne2b		19.2222	60.3947	1.33655	0.000263419	0.000822715
ENSDARG00000042848	pcmtl	393741	236.537	541.597	1.18838	4.17389e-22	5.9668e-21
ENSDARG00000062415	ctnnd2a	368485	68.4309	184.998	1.35473	2.34146e-10	1.46751e-09
ENSDARG00000010789	homer3	394088	367.517	832.492	1.1682	2.70691e-26	4.673e-25
ENSDARG00000105017	CT737138.1		0	7.71706	1.26005	0.00161837	0.00440477
ENSDARG00000086070	fgf20b	564770	6.5294	21.8574	1.18633	0.010019	0.022897
ENSDARG00000082753	AC024175.17		101.732	813.996	2.93508	1.49941e-104	1.64616e-102
ENSDARG00000042590	rbm19	387255	672.33	2032.43	1.58658	1.73067e-84	1.43308e-82
ENSDARG00000104868	KCNT1		0	10.1927	1.53013	0.000325652	0.00100093
ENSDARG00000095774	emd	558212	3.36872	21.2592	1.37374	0.00515063	0.0126704
ENSDARG00000075718	rpz5	100003142	142.196	454.251	1.57903	6.50483e-17	6.85268e-16
ENSDARG00000009123	sele	558139	47.2353	121.278	1.18307	0.000132948	0.000434824
ENSDARG00000016404	ptch1		3.71502	38.0609	2.08731	1.12236e-05	4.2473e-05
ENSDARG00000017466	ncam2	114441	3.5306	59.5517	2.82941	2.49883e-10	1.56413e-09
ENSDARG00000093165	si:dkey-16p6.2	108183709	2.66485	21.451	1.28494	0.00766005	0.0180396
ENSDARG00000040503	sb:cb81	100334443	27.9858	165.276	2.36938	5.57728e-18	6.3367e-17
ENSDARG00000078245	gal3st1b	793584	0	14.3725	1.87554	3.72546e-05	0.000131651
ENSDARG00000046010	kdm2bb	100536129	170.038	386.533	1.13422	2.54516e-13	2.03093e-12
ENSDARG00000101542	si:dkeyp-53d3.5	563210	40.5772	92.112	1.10124	5.83897e-05	0.000200996
ENSDARG00000096270	BX548046.2		0	6.51204	1.1006	0.00402973	0.0101389
ENSDARG00000061960	ube3b	556864	47.212	215.145	1.9705	3.54663e-14	3.07217e-13
ENSDARG00000015552	phactr4a	569383	279.722	714.998	1.32223	2.73313e-21	3.77462e-20
ENSDARG00000007412	slc2a1b	100321338	25.2765	76.7076	1.34831	5.22637e-05	0.000181249
ENSDARG00000055607	cgna	561423	280.09	691.277	1.25385	1.65388e-16	1.69393e-15
ENSDARG00000003250	pik3cd	394174	544.451	1116.6	1.02984	2.01872e-26	3.51602e-25
ENSDARG00000029234	stxbp5b	571925	181.393	397.659	1.08497	1.68086e-12	1.26239e-11
ENSDARG00000009134	hlx1	327096	0.938489	15.9763	1.60932	0.00145324	0.00399512
ENSDARG00000070743	tmem45a	553643	47.2135	136.6	1.40424	4.30358e-08	2.17764e-07
ENSDARG00000005104	limk2	436924	496.141	1563.93	1.62504	5.31015e-64	2.89863e-62
ENSDARG00000104242	dcp2	393121	584.888	1746.22	1.57133	7.87756e-79	5.80918e-77
ENSDARG00000015355	fosl1a	564241	223.131	1072.05	2.1817	4.84552e-49	1.80021e-47
ENSDARG00000069274	ighmbp2	556484	557.335	1244.32	1.14652	6.48239e-27	1.15163e-25
ENSDARG00000034871	mid2	799891	65.0371	206.314	1.48753	2.78445e-08	1.43307e-07
ENSDARG00000009594	nr1d2b	30271	54.1517	225.924	1.91422	4.1563e-18	4.74782e-17
ENSDARG00000099732	gfra1a		1.40773	24.4447	1.90643	0.000171881	0.000552904
ENSDARG00000099733	si:ch73-167c12.2		10.498	27.4732	1.00748	0.0197989	0.0419733
ENSDARG00000041572	zfpm1	407655	298.936	632.471	1.04442	2.41942e-16	2.45358e-15
ENSDARG00000019529	parp1	560788	761.619	1894.45	1.31338	3.23646e-61	1.6732e-59
ENSDARG00000097253	yeats2		131.734	407.966	1.49581	3.37633e-09	1.89435e-08
ENSDARG00000012600	HELZ2	570654	92.9728	618.201	2.63682	9.57054e-54	4.00487e-52
ENSDARG00000021200	nebl	541446	0	14.3861	1.97293	2.51856e-05	9.09419e-05
ENSDARG00000021209	kctd9a	541442	7.23435	62.3561	1.93078	3.92928e-05	0.000138478
ENSDARG00000063330	mgat4a	563038	214.378	554.233	1.3248	3.57565e-22	5.11532e-21
ENSDARG00000102774	znf687a		294.429	671.153	1.12737	4.15333e-10	2.55636e-09
ENSDARG00000037655	pls3	436598	26.1044	195.97	2.47396	1.67628e-14	1.49211e-13
ENSDARG00000056453	afap1l1b	768144	170.954	426.556	1.29403	6.24286e-17	6.59092e-16
ENSDARG00000037068	IKZF4	566844	193.948	508.23	1.32934	8.04272e-15	7.28317e-14
ENSDARG00000087238	si:ch211-161h7.4	569837	655.79	1478.32	1.15344	5.49967e-34	1.29957e-32
ENSDARG00000079363	lrig3		50.2654	120.145	1.1245	6.22362e-05	0.000213522
ENSDARG00000016011	gpcpd1	492483	36.0812	203.066	2.19474	5.08278e-14	4.33745e-13
ENSDARG00000094403	si:dkey-33c12.10		0	12.3881	1.79118	7.44306e-05	0.000252785
ENSDARG00000009418	mef2cb	798771	2.48043	18.3582	1.42786	0.00396807	0.00999408
ENSDARG00000075339	ipp		113.202	378.408	1.6854	4.08306e-25	6.74481e-24
ENSDARG00000091584	si:ch73-217n20.1	100329788	154.509	1152.33	2.80194	8.21874e-83	6.55553e-81
ENSDARG00000099961	bnip3	336116	5.82553	19.8422	1.21421	0.008237	0.0192292
ENSDARG00000019753	kcnn3	570138	14.2745	35.9067	1.03695	0.00834879	0.0194553
ENSDARG00000061923	amotl2a	558920	860.443	2302.89	1.40973	2.76241e-56	1.24385e-54
ENSDARG00000097358	BX901883.2		1.40773	14.2009	1.29844	0.00833771	0.0194341
ENSDARG00000057879	p3h3	553311	37.3165	145.055	1.809	2.40215e-10	1.50458e-09
ENSDARG00000056690	mtmr1a	553750	30.842	125.538	1.6142	1.98647e-05	7.27367e-05
ENSDARG00000101750	si:ch211-196p9.1	563968	190.402	586.299	1.54962	2.28528e-21	3.16955e-20
ENSDARG00000071150	cica	560266	456.43	1249.91	1.42864	1.95757e-40	5.70117e-39
ENSDARG00000060729	trim8b	559967	662.915	1516.09	1.18334	1.06527e-45	3.65862e-44
ENSDARG00000004415	tcf7l2	30510	1.87698	21.1999	1.52626	0.00206007	0.00550122
ENSDARG00000100781	COL28A1		103.985	2347.67	4.12666	5.55433e-56	2.46128e-54
ENSDARG00000103783	cyyr1	405818	0.469245	15.9777	1.58223	0.0011029	0.00309623
ENSDARG00000036080	cd81a	58031	140.474	952.658	2.60607	2.8662e-38	7.73637e-37
ENSDARG00000026376	aco1	568448	74.8112	349.297	2.0554	2.54541e-19	3.13832e-18
ENSDARG00000039512	ap1m3	445244	51.15	124.416	1.1609	7.09634e-06	2.76193e-05
ENSDARG00000032765	net1	493607	63.0546	528.166	2.8421	1.09979e-34	2.67981e-33
ENSDARG00000034643	fhl3a	567097	19.6005	159.862	2.65676	2.96846e-18	3.44067e-17
ENSDARG00000036863	MYO1D	559562	421.282	1085.98	1.32967	9.32279e-29	1.79671e-27
ENSDARG00000031075	cadm1a	569931	23.7619	54.0973	1.02994	0.00257076	0.00674153
ENSDARG00000075139	hdac5	557486	82.8648	192.498	1.11148	6.57481e-06	2.57485e-05
ENSDARG00000017757	pik3cg	406598	9.0695	122.778	3.19637	6.76142e-20	8.60232e-19
ENSDARG00000044373	atg4c	415193	8.06007	41.9576	1.81097	1.33917e-05	5.0096e-05
ENSDARG00000079931	snx19b	568980	339.691	745.926	1.11948	5.04944e-20	6.47907e-19
ENSDARG00000079939	jmjd1cb	558436	184.362	543.396	1.47224	1.94736e-14	1.72352e-13
ENSDARG00000012138	sgce	368230	0.938489	10.5577	1.20366	0.0135235	0.029943
ENSDARG00000074740	ARHGAP18	100004252	0	10.7926	1.59989	0.000216741	0.0006877
ENSDARG00000046090	dhrs11a	791578	3.77649	37.4919	1.97333	4.01856e-05	0.000141471
ENSDARG00000013266	colec11	492459	6.64468	75.3286	2.47748	2.4839e-08	1.28584e-07
ENSDARG00000092467	si:ch73-46j18.5		147.361	487.528	1.68711	4.57185e-35	1.12665e-33
ENSDARG00000040705	glsb	564746	120.454	267.627	1.11754	8.10813e-11	5.30285e-10
ENSDARG00000043734	trmu	553625	148.545	332.433	1.13699	4.42244e-13	3.47081e-12
ENSDARG00000061885	satb2	563435	27.7734	76.6778	1.19962	0.000564703	0.00166749
ENSDARG00000039063	si:dkey-194g4.1	100148296	210.208	585.779	1.43011	4.44746e-27	7.95171e-26
ENSDARG00000053222	asb5b	550449	0.938489	12.9585	1.36895	0.00549987	0.0134449
ENSDARG00000061773	neurl1ab	767739	65.904	157.589	1.20946	3.42282e-07	1.57459e-06
ENSDARG00000057683	mcm6	566409	3.89943	39.3959	1.96112	4.62951e-05	0.000161554
ENSDARG00000005185	cpn1	337172	39.6856	170.916	1.77479	9.82055e-08	4.77991e-07
ENSDARG00000005186	sp4	387291	295.811	628.129	1.06297	3.33857e-18	3.85138e-17
ENSDARG00000076873	C9orf172	799850	1.77657	41.1308	2.50536	7.11492e-07	3.15589e-06
ENSDARG00000062517	si:ch211-107n13.1	798535	3.8769	78.6536	2.85467	7.1078e-10	4.26861e-09
ENSDARG00000018228	htr2cl1	100000981	13.0606	48.4802	1.56054	3.27037e-05	0.000116453
ENSDARG00000036546	pdxkb	564697	9.84791	36.0547	1.36851	0.00154836	0.00423131
ENSDARG00000076120	foxp4	557245	42.2661	457.633	3.19407	1.03918e-48	3.84615e-47
ENSDARG00000077983	GPR89B	100331395	163.507	412.509	1.23995	9.99953e-09	5.38025e-08
ENSDARG00000074184	arhgap32b	569434	563.385	1401.77	1.2865	1.10053e-31	2.40296e-30
ENSDARG00000031136	moxd1	570584	14.8375	47.1318	1.05417	0.0236737	0.0493316
ENSDARG00000098330	spef2	553375	4.64224	24.229	1.11546	0.0229657	0.0480097
ENSDARG00000075584	itfg1	100331534	74.976	195.382	1.21896	1.66319e-05	6.15105e-05
ENSDARG00000088741	BX322530.1		1.65362	19.2718	1.80595	0.000354639	0.00108371
ENSDARG00000045706	tspan9b	431733	8.14517	38.5917	1.38699	0.00320748	0.00824453
ENSDARG00000045704	dclre1c	566285	81.3675	178.399	1.08905	7.25097e-08	3.58186e-07
ENSDARG00000016364	gna15.1	445232	0.703867	13.2093	1.54941	0.00230411	0.00610039
ENSDARG00000016360	kpna1	572542	293.141	746.76	1.32927	2.54303e-32	5.66659e-31
ENSDARG00000045708	adm2a	403114	2.41896	21.4991	1.65064	0.000879555	0.00250887
ENSDARG00000042282	itga6a	503893	0.469245	149.423	4.98679	5.06554e-14	4.32463e-13
ENSDARG00000055106	znf148	560300	13.0086	37.6632	1.25047	0.00132849	0.003671
ENSDARG00000008396	ftr24	619192	134.737	401.839	1.51068	1.57781e-16	1.61856e-15
ENSDARG00000055100	cxcl12b	799354	3.85689	15.7588	1.19511	0.0132208	0.0293525
ENSDARG00000040623	fosl2	558921	123.56	410.384	1.65786	2.64396e-25	4.39731e-24
ENSDARG00000045886	slc38a2	566537	171.632	805.277	2.12091	2.16529e-32	4.83038e-31
ENSDARG00000023868	AKAP13	108190639	47.9527	138.005	1.40706	7.3094e-09	3.98995e-08
ENSDARG00000079702	wdr81	100333062	551.785	1647.56	1.54991	3.07647e-49	1.14734e-47
ENSDARG00000018025	tbx2a	573084	2.46917	24.3318	1.74509	0.000444416	0.00133386
ENSDARG00000035949	tmem106bb	566699	1.77657	21.133	1.60881	0.0010991	0.00308646
ENSDARG00000076624	ptprb	100149130	147.486	325.772	1.11523	1.04806e-11	7.35937e-11
ENSDARG00000076622	atp13a3		28.1735	74.2343	1.11342	0.00226328	0.00599879
ENSDARG00000052846	fsta	100004116	0	21.714	2.56376	7.39368e-07	3.27191e-06
ENSDARG00000063075	soga1	797906	3.60334	27.6129	1.70249	0.000437587	0.00131478
ENSDARG00000100544	zgc:173486	100006445	17.1219	88.4313	2.03022	4.23194e-10	2.60146e-09
ENSDARG00000087417	zdhhc5b	792560	86.0883	203.456	1.15341	3.99167e-08	2.02611e-07
ENSDARG00000101635	dact1	405799	1.64236	20.8713	1.64004	0.00105301	0.00296767
ENSDARG00000014825	si:dkeyp-69b9.6		55.6915	224.648	1.88202	6.94769e-15	6.33264e-14
ENSDARG00000073708	zgc:171551	798325	0	8.95024	1.41286	0.000671437	0.00195781
ENSDARG00000017321	kdr	554230	9.29575	34.059	1.12279	0.0184097	0.0393225
ENSDARG00000075624	bend5	566161	12.5717	36.9858	1.10112	0.00989916	0.0226522
ENSDARG00000009949	fndc4b	100332162	15.9364	76.3104	1.99667	3.02021e-09	1.70384e-08
ENSDARG00000009499	syne1a		14.775	75.1949	1.89709	1.79922e-07	8.52992e-07
ENSDARG00000042322	si:dkey-177p2.6	568712	473.043	1079.71	1.16841	2.15121e-34	5.18358e-33
ENSDARG00000016536	npas2	352934	19.5373	101.328	2.03926	3.84776e-10	2.37501e-09
ENSDARG00000092362	hsp70.2	100535101	173.962	413.731	1.21925	4.03164e-17	4.34324e-16
ENSDARG00000044241	dram2b	415225	32.4851	99.1457	1.47305	3.79184e-07	1.73702e-06
ENSDARG00000056618	xk	497076	7.97859	35.5258	1.62236	0.000178182	0.000571669
ENSDARG00000019420	etnk1	565971	18.9487	87.2613	1.89468	2.53507e-09	1.44055e-08
ENSDARG00000096991	CR847968.1		0	7.01521	1.08838	0.00376179	0.00952609
ENSDARG00000061301	gmpr2	678545	61.9866	345.781	2.336	7.28359e-31	1.5505e-29
ENSDARG00000061303	oca2	567419	34.0659	99.5755	1.25473	0.000610593	0.0017954
ENSDARG00000013409	bmp2a	30631	0	12.152	1.69331	0.000116512	0.000384433
ENSDARG00000029668	crim1	404210	66.3808	221.473	1.64736	9.26328e-16	8.97042e-15
ENSDARG00000029663	rab1ab	368883	929.353	1900.11	1.02715	2.07771e-33	4.81644e-32
ENSDARG00000076393	tmem65	100005403	159.33	393.745	1.23465	3.54574e-12	2.59419e-11
ENSDARG00000067976	ar	100005148	72.3256	323.357	2.01452	4.2974e-21	5.85633e-20
ENSDARG00000018757	klf5l	562670	22.2145	121.374	2.07314	1.34208e-10	8.61592e-10
ENSDARG00000073856	znf319a	100149007	286.815	611.381	1.05493	2.80123e-15	2.62173e-14
ENSDARG00000076980	ppp1r16a	794494	214.548	479.41	1.14854	3.26944e-18	3.77608e-17
ENSDARG00000001129	dicer1	324724	1629.28	3464.9	1.07879	4.894e-39	1.35465e-37
ENSDARG00000014572	chpt1	322605	8.81415	77.6645	2.46398	4.76952e-10	2.91592e-09
ENSDARG00000082123	AC024175.15		1.66309	25.9743	2.34357	4.92502e-06	1.95144e-05
ENSDARG00000043237	nfil3-2	792516	12.3283	59.2649	1.67504	7.30228e-05	0.000248262
ENSDARG00000069472	chsy3		27.968	112.872	1.793	2.11397e-10	1.33005e-09
ENSDARG00000079191	zgc:172122	571844	0	9.55938	1.45186	0.000502734	0.00149558
ENSDARG00000035715	marcksl1b	406504	171.491	420.084	1.25263	2.25075e-15	2.12381e-14
ENSDARG00000035719	arl5c	393819	368.528	800.761	1.12097	2.57916e-22	3.71696e-21
ENSDARG00000094729	apela	100536023	0	8.57726	1.30365	0.00111663	0.00313253
ENSDARG00000094725	si:ch211-284e13.5	793850	302.464	613.852	1.00006	1.10671e-18	1.30995e-17
ENSDARG00000092976	si:ch211-127i16.2	558050	3.41892	44.7496	2.44289	1.50773e-07	7.22337e-07
ENSDARG00000008886	msx1b	30511	67.2149	262.207	1.89843	7.01363e-20	8.91159e-19
ENSDARG00000091777	mapkap1	100537196	187.798	481.7	1.31679	1.83903e-22	2.66605e-21
ENSDARG00000055575	pcolce2b	393432	23.3912	97.6339	1.63237	1.61495e-05	5.98281e-05
ENSDARG00000052652	fermt1	100332544	9.40742	36.1216	1.14652	0.0165816	0.035834
ENSDARG00000052654	thrab	558427	26.2652	62.4514	1.02434	0.00315643	0.00813116
ENSDARG00000098113	CABZ01007222.1		2.18434	13.821	1.2354	0.0128683	0.0286775
ENSDARG00000011941	bmpr2a	562822	6.50281	60.7608	2.10359	5.14042e-06	2.0339e-05
ENSDARG00000020178	nova1	555590	26.2998	78.4384	1.36753	0.000190002	0.000607895
ENSDARG00000002204	hspb11	796767	13.4978	93.2395	2.33021	2.63281e-11	1.78862e-10
ENSDARG00000062590	pleca	567639	35.7716	97.4754	1.30523	3.02737e-06	1.23149e-05
ENSDARG00000005356	tyro3	30709	4.18426	23.1995	1.43981	0.00286172	0.00743863
ENSDARG00000059826	crtac1a	559626	17.4577	55.4686	1.4365	3.30621e-05	0.000117622
ENSDARG00000042428	gstt1a	563972	36.0393	99.1528	1.24742	0.000138994	0.000453685
ENSDARG00000089217	ubap1la	100004590	17.6981	42.9973	1.01418	0.0130583	0.0290424
ENSDARG00000089213	adam15	795199	4.48036	40.6131	2.05978	9.18826e-06	3.5228e-05
ENSDARG00000003022	limk1b	101883214	0	6.40739	1.03189	0.0054388	0.0133189
ENSDARG00000009040	si:ch73-141c7.1	393762	13.9442	48.0695	1.47533	0.000229144	0.000723764
ENSDARG00000002644	rgs5a	573765	7.41877	32.9723	1.2929	0.00643386	0.0154783
ENSDARG00000002642	sh3gl1b	378838	188.118	603.671	1.63304	8.89841e-33	2.00337e-31
ENSDARG00000087303	cebpd	140817	14.3661	101.994	2.48693	2.1254e-14	1.876e-13
ENSDARG00000013144	atp1b1a	64267	127.78	962.712	2.79494	1.37876e-72	9.10259e-71
ENSDARG00000059048	mpzl1l	555163	97.2839	211.405	1.09076	1.07896e-08	5.78465e-08
ENSDARG00000017835	brf1a	334402	657.009	1483.75	1.17468	7.33796e-43	2.30544e-41
ENSDARG00000040064	acp6	558758	26.881	120.151	1.74578	2.00874e-06	8.36819e-06
ENSDARG00000040067	si:ch211-274j7.1		5.887	21.5382	1.1735	0.0129649	0.0288631
ENSDARG00000012534	slc6a6a	556480	0	9.50042	1.4603	0.000496246	0.0014774
ENSDARG00000039142	arpc5a	336504	56.6075	155.861	1.36468	5.07982e-09	2.8074e-08
ENSDARG00000052433	inha	570520	25.9059	210.267	2.68441	7.34822e-22	1.03681e-20
ENSDARG00000063908	mt-co2	140540	1354.21	21215.6	3.95165	0	0
ENSDARG00000070371	kat7a	767644	123.929	274.379	1.08135	5.46462e-09	3.01232e-08
ENSDARG00000086815	MYADM	100005501	9.29357	69.7538	2.45451	1.73327e-10	1.09901e-09
ENSDARG00000103677	CABZ01008730.1	799881	12.3549	34.8842	1.18009	0.00360057	0.00916295
ENSDARG00000062381	si:ch211-238n5.4	556432	319.126	683.841	1.0961	5.01992e-17	5.35477e-16
ENSDARG00000062382	snapin	567959	198.18	404.756	1.01917	5.45165e-10	3.31475e-09
ENSDARG00000036462	rab11fip1b		600.198	1513.34	1.3287	1.22865e-53	5.10855e-52
ENSDARG00000038731	slc25a36a	436940	14.9707	171.078	3.05482	1.66006e-23	2.53444e-22
ENSDARG00000073789	BX537350.1	101882987	284.872	753.269	1.36167	2.41133e-29	4.8133e-28
ENSDARG00000074319	sall1a	555721	65.8251	216.186	1.5818	8.19715e-11	5.35927e-10
ENSDARG00000074316	itga1	570868	8.32958	67.8783	2.07161	3.69183e-06	1.48448e-05
ENSDARG00000069388	tmem88b		3.54187	22.7474	1.49769	0.00215265	0.005732
ENSDARG00000080009	bahcc1b	794333	110.373	823.758	2.8295	1.74222e-95	1.65274e-93
ENSDARG00000045628	rab34a	450074	4.54183	39.1408	2.03236	1.01529e-05	3.87018e-05
ENSDARG00000008100	slc7a10a	567420	27.0986	131.176	2.05763	1.94357e-13	1.56688e-12
ENSDARG00000014085	atp6v1e1a	108179059	35.2834	159.538	2.00318	1.79995e-15	1.70999e-14
ENSDARG00000061436	col6a2	567771	26.7232	143.92	2.11936	6.44145e-13	4.99916e-12
ENSDARG00000061437	inpp5f	570007	633.432	1420.27	1.14677	1.2496e-31	2.71935e-30
ENSDARG00000061439	ugt5c3	563413	96.5142	229.041	1.16376	4.22901e-08	2.14157e-07
ENSDARG00000079062	samd1b	101884198	3.81434	22.8948	1.43176	0.00299325	0.00774141
ENSDARG00000101430	CT583728.13		6.59087	65.8441	2.63286	9.97674e-11	6.46866e-10
ENSDARG00000076730	syt6a	100149310	2.46917	14.2453	1.13653	0.0219931	0.0461643
ENSDARG00000026166	emilin1b		312.959	967.357	1.58508	4.23823e-41	1.26255e-39
ENSDARG00000055445	slc22a15	555262	172.672	611.749	1.79986	1.94859e-38	5.2888e-37
ENSDARG00000055446	FAM237B		25.9917	58.6124	1.01009	0.00621042	0.0149925
ENSDARG00000053136	b2m	30400	124.132	261.571	1.02289	5.91179e-09	3.24609e-08
ENSDARG00000062998	pglyrp2	568634	26.374	65.1651	1.12453	0.000565046	0.00166825
ENSDARG00000029381	aldh3a2b	447920	0	7.71574	1.23122	0.00182163	0.00491214
ENSDARG00000103195	dync1i2b	561612	13.1439	35.8477	1.08521	0.0078208	0.0183651
ENSDARG00000068365	lmx1bb	554360	15.7047	56.3099	1.51136	3.23373e-05	0.000115254
ENSDARG00000024092	lmbr1	557300	160.351	749.677	2.17624	3.26057e-55	1.41282e-53
ENSDARG00000103730	vgll4b		52.0362	126.446	1.20215	2.12632e-06	8.83832e-06
ENSDARG00000100427	BX547934.2		23.7033	67.1188	1.26519	0.000167986	0.000540911
ENSDARG00000034117	rarga	30606	180.73	398.634	1.11595	1.35324e-15	1.29632e-14
ENSDARG00000062463	zc3h12b		239.638	589.124	1.26183	1.3002e-23	2.00383e-22
ENSDARG00000098683	zmiz2	100333571	110.026	503.048	2.09047	1.16488e-34	2.83487e-33
ENSDARG00000007601	zmynd8	564460	27.602	101.531	1.57494	1.88269e-06	7.87791e-06
ENSDARG00000001975	hsd11b2	334098	20.8162	210.781	2.90716	2.76589e-21	3.81716e-20
ENSDARG00000030417	PKD1		55.2351	120.431	1.05109	1.94433e-05	7.13273e-05
ENSDARG00000079474	MSANTD2		25.8687	138.031	2.10654	4.53162e-12	3.27746e-11
ENSDARG00000079473	MAP3K21	561518	40.0475	88.2647	1.03859	0.000154122	0.000498981
ENSDARG00000003963	traf4a	404045	141.534	498.723	1.74419	1.27285e-26	2.23286e-25
ENSDARG00000058226	ak3	406404	26.1801	116.409	1.90838	7.28438e-11	4.78975e-10
ENSDARG00000041665	mkrn1	170782	872.235	2367.19	1.43226	8.03177e-105	8.86762e-103
ENSDARG00000096546	nrp2a	405901	30.4153	138.094	1.98337	1.47176e-13	1.19689e-12
ENSDARG00000017780	rorcb	562258	3.23451	34.9931	2.07099	1.6426e-05	6.08063e-05
ENSDARG00000017785	zgc:158689		1.64236	87.7435	3.67361	2.17966e-13	1.74856e-12
ENSDARG00000012446	si:ch211-183d5.1		14.5593	53.6611	1.51266	4.69148e-05	0.000163482
ENSDARG00000002952	smo	30225	27.1299	85.7099	1.45297	1.28168e-06	5.48187e-06
ENSDARG00000013794	klf11b	559076	132.063	581.491	2.01876	1.5122e-24	2.43422e-23
ENSDARG00000061194	hectd2	562999	4.23447	31.5483	1.66506	0.000596308	0.00175603
ENSDARG00000028676	nuak1b	561496	38.3979	107.166	1.272	4.12933e-05	0.000145083
ENSDARG00000062262	ednrab	405866	2.76526	37.3952	2.30274	1.76236e-06	7.40645e-06
ENSDARG00000010773	pnpla6	560986	296.376	629.772	1.05212	4.66152e-15	4.28684e-14
ENSDARG00000038300	rnf34a	334203	612.505	1389.14	1.1722	4.46858e-52	1.79312e-50
ENSDARG00000038305	VGLL3		9.25283	45.6704	1.75668	4.97349e-05	0.000173001
ENSDARG00000056561	asb11	791758	2.34622	18.5243	1.14726	0.0168945	0.0364567
ENSDARG00000005846	FO704755.1	799504	18.9269	68.9701	1.61585	1.06406e-06	4.61165e-06
ENSDARG00000102125	iqsec2a	560461	101.392	321.934	1.56823	1.11851e-16	1.1565e-15
ENSDARG00000032795	tmem8a	559126	14.8477	42.3906	1.1571	0.00347613	0.00888098
ENSDARG00000070717	slc25a18	568740	39.7809	108.252	1.31487	6.37772e-07	2.84941e-06
ENSDARG00000063677	ccny	557738	0.938489	11.0436	1.20542	0.0126992	0.0283394
ENSDARG00000087381	tcf23		2.35749	15.4878	1.36162	0.00620794	0.0149883
ENSDARG00000104273	BX664721.4		0	8.91252	1.20512	0.00154977	0.00423398
ENSDARG00000104279	appa	58083	578.939	1324.86	1.15277	7.40559e-13	5.72016e-12
ENSDARG00000034093	dclk2a	572548	37.8228	121.421	1.48545	2.00193e-07	9.43603e-07
ENSDARG00000001953	pfkfb3	554477	68.5019	250.359	1.78592	4.41619e-21	6.01086e-20
ENSDARG00000001950	ak1	445486	1.87698	22.923	1.56366	0.00153929	0.00420947
ENSDARG00000079250	BX323590.1		232.391	547.435	1.19557	1.60579e-14	1.43224e-13
ENSDARG00000035056	fgf13a	492758	40.3673	132.129	1.55047	4.64939e-09	2.57316e-08
ENSDARG00000041006	st3gal4	504044	1.40773	49.052	2.91302	1.63984e-08	8.64001e-08
ENSDARG00000075539	snphb	569963	34.7131	131.645	1.70865	3.87905e-09	2.16152e-08
ENSDARG00000075533	zbtb24	553955	67.1603	205.218	1.50737	9.7079e-13	7.43385e-12
ENSDARG00000017211	plxnb1b	570222	61.8914	146.956	1.13512	3.06107e-06	1.24391e-05
ENSDARG00000040352	crot	553204	40.1461	258.112	2.37849	3.63734e-17	3.92495e-16
ENSDARG00000043527	plpp6	553687	109.528	306.648	1.4313	3.98626e-16	3.96839e-15
ENSDARG00000099129	phlda1	449990	20.1669	57.9257	1.16186	0.00467369	0.0115905
ENSDARG00000016623	si:ch211-195b13.1	768159	116.446	240.836	1.03021	3.08487e-07	1.42349e-06
ENSDARG00000092167	si:ch211-272h9.5		0	9.63192	1.48877	0.000429892	0.00129325
ENSDARG00000019516	sp7		32.7499	115.918	1.69713	6.49443e-10	3.91227e-09
ENSDARG00000059729	sec14l8	558964	0	12.8482	1.78356	7.05419e-05	0.000240162
ENSDARG00000059722	ubac1	795038	234.513	580.87	1.26052	7.5628e-18	8.50848e-17
ENSDARG00000025754	ube2f	406606	336.918	930.67	1.45735	5.64928e-42	1.71693e-40
ENSDARG00000023694	spon1b	58029	12.8489	98.0715	2.18677	1.01846e-07	4.94847e-07
ENSDARG00000061017	spns2	568117	16.9895	44.3729	1.07784	0.00547637	0.0133992
ENSDARG00000071029	si:dkey-147f3.4	553461	0	6.87573	1.13862	0.00318229	0.00818699
ENSDARG00000005416	map3k5	555703	149.57	334.352	1.10728	3.36321e-11	2.26556e-10
ENSDARG00000103542	vegfaa	30682	48.4285	160.358	1.60855	5.65126e-10	3.42653e-09
ENSDARG00000018671	si:ch211-262i1.4		0	6.79923	1.06803	0.00429887	0.0107497
ENSDARG00000101949	numbl	497616	7.77633	37.4784	1.45244	0.00166903	0.00453381
ENSDARG00000105255	zbtb4	798710	5.91828	41.1861	1.96687	1.02607e-05	3.90638e-05
ENSDARG00000102702	lrrn3b	100535105	5.1104	21.5891	1.33427	0.00470162	0.0116524
ENSDARG00000030632	ccdc3b	553593	3.20323	15.0102	1.22256	0.012355	0.0276503
ENSDARG00000005257	si:dkey-110k5.10	100005704	63.9499	157.277	1.20497	1.99696e-07	9.41487e-07
ENSDARG00000104663	zgc:103755	449988	37.833	92.2031	1.15964	2.39337e-05	8.65812e-05
ENSDARG00000031587	flvcr1	562595	6.55013	29.3035	1.56091	0.000527732	0.00156613
ENSDARG00000004618	stx2a	445167	2.58084	23.3619	1.3699	0.00506379	0.012474
ENSDARG00000089156	egr3	436920	18.5827	119.063	2.15867	2.89034e-09	1.6334e-08
ENSDARG00000089159	si:dkeyp-89c11.2		55.8036	240.998	1.9278	1.73278e-14	1.53919e-13
ENSDARG00000102080	mif4gda	393355	41.305	194.866	2.01745	6.49254e-15	5.93161e-14
ENSDARG00000062401	znf319b	792588	82.2533	175.803	1.02185	6.12453e-06	2.40767e-05
ENSDARG00000060515	zdhhc9	560095	243.305	700.723	1.4888	7.34095e-30	1.4959e-28
ENSDARG00000042742	stx6	550577	159.92	354.138	1.12891	1.71584e-13	1.3896e-12
ENSDARG00000043309	obscna		0	25.129	2.73526	2.39024e-07	1.11854e-06
ENSDARG00000077588	pdgfc	560564	136.765	382.866	1.44636	9.22318e-17	9.57701e-16
ENSDARG00000074589	rin2	100006622	10.0211	188.736	3.6885	6.84535e-30	1.39929e-28
ENSDARG00000059871	shrprbck1r	569903	208.999	497.937	1.22621	9.34064e-19	1.10963e-17
ENSDARG00000004451	tnfrsfa	114461	137.929	383.534	1.41457	9.06651e-18	1.01535e-16
ENSDARG00000020031	cldn11a	436897	115.652	279.873	1.20237	9.11939e-10	5.42996e-09
ENSDARG00000055377	gnb5b	393719	0.938489	11.5388	1.21496	0.0115945	0.0261398
ENSDARG00000011088	si:ch211-288d18.1	558401	1.18438	15.4517	1.45645	0.00292443	0.00758349
ENSDARG00000041799	cx43	30236	84.2502	1017.2	3.46298	1.3667e-114	1.67975e-112
ENSDARG00000070230	aldh1l2	100333269	20.8551	64.6733	1.28356	0.000738902	0.00213857
ENSDARG00000037889	wnt9b	565677	0	17.9999	2.17623	6.25527e-06	2.4566e-05
ENSDARG00000024017	mdga2a	368826	125.216	257.988	1.00271	4.75395e-08	2.39561e-07
ENSDARG00000070581	ggact.1	777609	15.7531	66.238	1.71882	1.50795e-06	6.39367e-06
ENSDARG00000070583	itpk1b	100148744	129.234	306.9	1.18286	2.80916e-11	1.90283e-10
ENSDARG00000020771	tnr	369191	12.5328	85.4711	2.20044	5.47971e-09	3.01901e-08
ENSDARG00000063407	CABZ01052815.1		3.25704	43.2283	1.8242	0.000160434	0.000518471
ENSDARG00000062756	pllp	558650	35.027	83.1501	1.11746	0.000191888	0.000613026
ENSDARG00000000943	dzip1	402875	4.06132	17.8628	1.12506	0.0220504	0.0462647
ENSDARG00000082789	AC024175.18		7.35621	167.326	3.88078	5.24159e-29	1.02739e-27
ENSDARG00000026325	mmp11a	563753	4.77645	30.8855	1.6879	0.000318712	0.000981449
ENSDARG00000077749	usp54b	100535699	4.21156	33.6149	1.33182	0.00328959	0.00843749
ENSDARG00000004796	mgrn1b	553327	381.22	792.96	1.01822	4.71204e-14	4.03518e-13
ENSDARG00000070917	kitlga	553179	8.63153	28.1713	1.1352	0.0132989	0.0295092
ENSDARG00000070916	dnajc27	402784	54.3918	218.577	1.92408	3.18296e-20	4.1193e-19
ENSDARG00000070914	dusp6	353314	99.8932	827.946	3.00729	1.48026e-95	1.41108e-93
ENSDARG00000010936	abcb4	100136865	36.5318	302.673	2.79414	2.53536e-24	4.03141e-23
ENSDARG00000009689	daam1b	560060	71.4002	307.784	1.44121	0.00139563	0.00384348
ENSDARG00000080128	AC024175.1		1.83624	55.0483	3.29208	5.83036e-11	3.85278e-10
ENSDARG00000069113	dbn1	561153	3.89943	18.8505	1.18232	0.0159571	0.0346483
ENSDARG00000016470	anxa5b	337132	763.643	1607.29	1.06919	2.03051e-47	7.20148e-46
ENSDARG00000044328	ankrd46a	100329397	1.17311	29.8888	2.19529	2.06793e-05	7.5493e-05
ENSDARG00000079962	doc2d	100002795	17.1739	43.9218	1.08221	0.00379855	0.00960675
ENSDARG00000079964	dlx2a	30574	0.703867	12.1881	1.29742	0.00669325	0.0160195
ENSDARG00000061265	lmln	560606	1.67255	10.5389	1.1116	0.0185349	0.0395684
ENSDARG00000075930	adamts2	571682	6.78764	43.883	1.79442	7.85669e-05	0.000265553
ENSDARG00000077265	wdr89	100148281	224.699	558.721	1.27094	3.70701e-21	5.07655e-20
ENSDARG00000077261	lmod1b	795335	3.1843	29.3115	1.95413	4.66934e-05	0.000162798
ENSDARG00000041421	taz	321965	178.931	392.454	1.12511	2.76112e-13	2.19877e-12
ENSDARG00000099563	inpp5ka	100037338	55.0116	211.635	1.77017	1.37487e-12	1.04017e-11
ENSDARG00000035706	dock6		324.593	1118.18	1.74463	4.15275e-48	1.51972e-46
ENSDARG00000039724	CABZ01007893.1		0	6.95889	1.12258	0.00333898	0.00855854
ENSDARG00000090890	cmklr1	557341	20.7831	88.7923	1.79973	3.33796e-08	1.70671e-07
ENSDARG00000089878	nedd9	768136	19.3594	186.228	2.72474	8.71481e-16	8.46025e-15
ENSDARG00000089871	si:ch211-203c7.2	100001168	10.06	31.7216	1.17127	0.00699559	0.0166554
ENSDARG00000035837	zgc:153595	767723	41.4826	99.0188	1.18014	1.70793e-05	6.30816e-05
ENSDARG00000076829	ankib1b	561277	473.46	1403.06	1.5515	2.41972e-70	1.55037e-68
ENSDARG00000052680	si:dkey-182g1.2	100005482	835.405	1684.18	1.00496	1.05563e-37	2.80287e-36
ENSDARG00000005150	tbx20	57936	18.47	69.2615	1.58716	4.22444e-06	1.68788e-05
ENSDARG00000076799	rnd3a	80963	86.0392	332.869	1.86332	1.7971e-23	2.73513e-22
ENSDARG00000060941	si:ch211-277e21.2		0.938489	11.0033	1.19216	0.0134506	0.029812
ENSDARG00000039863	lifrb	565104	10.8479	37.4257	1.33634	0.00134469	0.00371209
ENSDARG00000026519	ralgps2		130.52	443.95	1.67301	3.31298e-14	2.88127e-13
ENSDARG00000070898	si:ch211-262h13.3	569577	18.7101	95.616	2.08579	1.84172e-09	1.06513e-08
ENSDARG00000089795	sertad4	797299	0	9.49113	1.31727	0.000874653	0.00249707
ENSDARG00000094646	dyrk2	557602	299.418	603.917	1.00304	1.64352e-18	1.92899e-17
ENSDARG00000092696	cyp11a2	563363	2.46917	42.2806	2.53243	1.70932e-07	8.12739e-07
ENSDARG00000042259	tgfbr1b	792928	0.938489	19.7537	1.79588	0.000428306	0.00128901
ENSDARG00000008697	epas1a	566886	1.29606	16.7008	1.69416	0.000879167	0.00250813
ENSDARG00000041505	itm2bb	406248	213.347	557.412	1.34582	4.39126e-19	5.32015e-18
ENSDARG00000093253	MFSD3	100332553	32.1381	90.5906	1.3372	3.70856e-06	1.49059e-05
ENSDARG00000061548	si:ch211-145o7.3	100003583	4.88704	18.6263	1.16697	0.0146214	0.0320615
ENSDARG00000061543	ccdc85b	564324	46.566	186.794	1.80055	2.92466e-11	1.97901e-10
ENSDARG00000013500	abca2	100006090	85.8505	339.977	1.85973	1.55227e-16	1.59404e-15
ENSDARG00000057419	slc44a5b	558142	23.0343	176.854	2.51254	2.53053e-14	2.22354e-13
ENSDARG00000078425	oat	572518	20.71	50.6985	1.10649	0.00288978	0.00749962
ENSDARG00000074742	elmod3	100537442	3.57972	20.4354	1.32968	0.00570982	0.0139007
ENSDARG00000054332	trim66	566660	1.2033	22.9257	2.13011	4.18658e-05	0.000146989
ENSDARG00000062096	pm20d1.2	768158	47.6543	116.573	1.14736	4.54358e-05	0.000158696
ENSDARG00000101322	tfr1a	494477	85.9922	1053.48	2.90683	3.41269e-14	2.9614e-13
ENSDARG00000101320	si:dkey-50i6.5		0.234622	7.48487	1.20344	0.00810459	0.0189518
ENSDARG00000103878	anpepb	322533	16.8015	43.5502	1.01361	0.0171034	0.0368424
ENSDARG00000004697	rxrgb	436617	12.8991	52.629	1.31239	0.00435248	0.0108698
ENSDARG00000056407	irf8	436895	8.24558	57.52	1.94892	9.10741e-06	3.49385e-05
ENSDARG00000062864	gk5	777765	612.094	1534.45	1.3067	2.42885e-49	9.09285e-48
ENSDARG00000077054	fam198b	566369	19.3554	72.9972	1.66341	5.42494e-07	2.43935e-06
ENSDARG00000069501	abhd11	446169	48.6907	134.638	1.30004	1.84465e-06	7.72903e-06
ENSDARG00000074502	zmiz1a	561061	434.643	1097.62	1.30254	4.71022e-24	7.37557e-23
ENSDARG00000073731	dok4	568912	8.936	25.8468	1.12697	0.0120085	0.026955
ENSDARG00000080630	AC024175.6		1.7653	16.6806	1.54295	0.00216842	0.00576927
ENSDARG00000070625	enpp5	563498	37.554	112.063	1.44723	1.21812e-07	5.88054e-07
ENSDARG00000017312	lmbrd2b	335257	214.102	457.346	1.08431	1.3916e-14	1.24804e-13
ENSDARG00000075362	dfnb31a	100334777	126.516	470.049	1.82753	5.33029e-34	1.26567e-32
ENSDARG00000095300	mxra7	100034383	43.6989	101.103	1.12766	5.62699e-05	0.000194349
ENSDARG00000093686	si:rp71-36a1.2	100034566	0	16.089	2.12539	1.01537e-05	3.87018e-05
ENSDARG00000061976	sema6bb	100148883	79.7121	221.97	1.40004	1.79361e-10	1.13507e-09
ENSDARG00000061974	grhl2b	100034503	9.5529	37.8126	1.23197	0.0086488	0.0200616
ENSDARG00000056647	klhl3	568556	2.34622	16.8644	1.12543	0.0203378	0.0430038
ENSDARG00000056648	ext2	493780	423.56	1045.72	1.29034	7.83498e-35	1.91628e-33
ENSDARG00000012066	dcn	64698	30.6729	82.4992	1.1708	0.000677494	0.001974
ENSDARG00000090656	tomm20a		6.76402	24.7868	1.3504	0.00224576	0.00595718
ENSDARG00000037804	phlda3	368779	0	8.15725	1.23514	0.00160273	0.00436705
ENSDARG00000005574	vsx2	796163	0.592189	27.3217	2.55221	6.03099e-06	2.37234e-05
ENSDARG00000061354	foxred2	767722	8.71482	34.8669	1.26738	0.00631197	0.0152113
ENSDARG00000011876	ednraa	114550	3.66481	19.8485	1.17591	0.0165862	0.035839
ENSDARG00000103226	dhcr7	378446	85.2481	241.416	1.46164	2.21823e-13	1.77732e-12
ENSDARG00000053453	mpp2a	562207	2.70379	41.9467	2.45083	3.43537e-07	1.58e-06
ENSDARG00000036785	si:ch211-226m16.2	100003708	28.5103	99.2053	1.44759	6.78971e-05	0.000231804
ENSDARG00000101481	rbp5	171477	35.0339	115.045	1.54521	4.90209e-08	2.46581e-07
ENSDARG00000037783	proza	768176	45.114	118.612	1.2116	0.000124059	0.00040766
ENSDARG00000102593	si:ch211-214b16.2	799802	24.3043	75.6341	1.36427	5.88073e-05	0.000202326
ENSDARG00000007358	cxcr3.1	654692	14.5516	47.8857	1.32795	0.000630327	0.00184979
ENSDARG00000004714	tcf12	407985	68.866	220.4	1.60149	1.27617e-13	1.04303e-12
ENSDARG00000089369	fdxr	100536115	186.813	412.719	1.0818	1.59157e-09	9.25395e-09
ENSDARG00000089940	znf1008	101886637	5.60983	21.3986	1.24885	0.00833682	0.0194341
ENSDARG00000002405	si:ch211-225b11.1	561694	55.1084	172.968	1.48605	1.1274e-08	6.03111e-08
ENSDARG00000077155	TMEM116	100003849	133.087	381.974	1.47346	3.57815e-23	5.36229e-22
ENSDARG00000079323	rgmb	414273	126.271	424.115	1.67036	3.03007e-19	3.72179e-18
ENSDARG00000103340	clic1	324481	138.257	296.049	1.04068	8.75959e-09	4.74577e-08
ENSDARG00000045595	si:dkey-14k9.3	324173	5.49158	37.9531	1.70523	0.000317463	0.000978373
ENSDARG00000099078	SLC29A2		47.5751	106.408	1.04805	0.00014987	0.000486343
ENSDARG00000091720	wu:fe17e08		37.4063	94.6238	1.19538	2.14561e-05	7.81392e-05
ENSDARG00000091726	aebp1	793308	3.65355	16.5385	1.16018	0.018392	0.0392934
ENSDARG00000078717	itga8	100141346	22.2123	52.3349	1.04627	0.00389307	0.00982037
ENSDARG00000093760	si:ch211-197h24.9	562659	11.1829	92.363	2.55712	6.80466e-14	5.71943e-13
ENSDARG00000044642	sc5d	447891	40.8194	123.372	1.51057	2.44846e-09	1.39374e-08
ENSDARG00000058127	hcfc2	550401	324.839	858.424	1.37486	4.48639e-35	1.10698e-33
ENSDARG00000053279	apln	798375	4.59203	25.035	1.36806	0.00484882	0.0119853
ENSDARG00000054723	si:ch211-242b18.1	566905	135.387	295.493	1.06263	3.39447e-09	1.90313e-08
ENSDARG00000070467	lactbl1b	567200	9.44779	30.0873	1.2505	0.00344378	0.00880293
ENSDARG00000056386	tmc1	567237	59.0664	130.604	1.04513	1.43088e-05	5.33733e-05
ENSDARG00000060496	cacna1ha	560875	24.6287	75.9368	1.32321	0.000400818	0.00121157
ENSDARG00000055897	zgc:154093	777623	8.38745	151.016	3.47166	7.00103e-24	1.08928e-22
ENSDARG00000076174	trim2b	558046	106.454	491.034	2.13358	4.23822e-41	1.26255e-39
ENSDARG00000076171	znf827	565077	20.2789	61.817	1.0512	0.0220706	0.046302
ENSDARG00000040985	itgbl1	554050	0.938489	42.7142	3.06751	2.085e-08	1.0874e-07
ENSDARG00000086292	st6galnac	407706	3.1843	26.4711	1.70224	0.000501489	0.0014921
ENSDARG00000024920	tmem136a	562331	33.2399	114.924	1.63746	3.83311e-08	1.94917e-07
ENSDARG00000030297	sox13		454.385	1577.44	1.75871	3.48399e-52	1.41547e-50
ENSDARG00000104716	zgc:91849	572021	5.2457	56.6683	2.42766	2.31794e-08	1.20375e-07
ENSDARG00000075284	kansl1l		13.0322	44.8208	1.36314	0.000766806	0.00221408
ENSDARG00000070108	dek	692304	303.252	860.528	1.48464	1.94829e-33	4.52718e-32
ENSDARG00000088195	si:ch211-168f7.5	322178	15.0682	111.085	2.51935	9.57045e-15	8.6386e-14
ENSDARG00000069909	HTRA2		129.955	292.06	1.12274	8.30863e-12	5.885e-11
ENSDARG00000074908	col6a1	569755	39.1752	171.576	1.9249	7.52052e-13	5.80434e-12
ENSDARG00000102142	ece2b	793465	20.6412	79.8275	1.62529	1.63998e-06	6.92642e-06
ENSDARG00000042948	dnajc5aa	386768	92.2904	268.542	1.48999	3.25014e-15	3.02882e-14
ENSDARG00000017803	gsk3b	30654	53.1336	119.812	1.11166	1.31638e-05	4.92904e-05
ENSDARG00000062430	gpd2	751628	6.67127	27.6126	1.44931	0.00150147	0.00411641
ENSDARG00000020326	tyk2	100536675	52.9055	168.738	1.4129	1.93447e-05	7.09924e-05
ENSDARG00000041304	trak1	100002689	426.275	868.975	1.02787	1.29372e-22	1.88671e-21
ENSDARG00000078691	gigyf1	100002679	864.286	2209.2	1.34455	1.07089e-66	6.34164e-65
ENSDARG00000095509	CR759885.1		5.91828	46.6432	2.21034	1.6879e-07	8.03336e-07
ENSDARG00000022891	zgc:175214	557610	9.9796	46.1948	1.60798	0.000127634	0.000418494
ENSDARG00000098640	CU984600.3		2.65358	14.7889	1.16213	0.018984	0.0403992
ENSDARG00000052063	col4a5	323561	58.6135	453.377	2.66058	1.24947e-23	1.92716e-22
ENSDARG00000052061	col4a6	554268	41.6721	293.395	2.59946	1.23224e-30	2.58374e-29
ENSDARG00000055284	afap1	568356	3.5306	43.1689	2.3312	6.27927e-07	2.808e-06
ENSDARG00000019098	cd82a	324098	23.2646	280.987	3.12707	4.76149e-25	7.82582e-24
ENSDARG00000056483	ssbp4	321750	122.139	404.869	1.64733	1.00908e-21	1.41663e-20
ENSDARG00000061660	CABZ01055347.1		164.122	869.522	1.91055	1.12214e-06	4.84511e-06
ENSDARG00000061664	zgc:162707	100002095	1.82677	12.2579	1.27011	0.0112509	0.0254444
ENSDARG00000097723	BX927282.3		4.8965	17.1811	1.13488	0.0171666	0.0369582
ENSDARG00000097726	si:ch211-149e23.4	797154	0	36.9149	3.22098	8.9934e-09	4.86559e-08
ENSDARG00000055751	fosb	492346	103.917	697.111	2.61091	1.91712e-50	7.38944e-49
ENSDARG00000062515	tecpr1a	556500	136.908	565.402	1.97897	2.71628e-42	8.38571e-41
ENSDARG00000056228	pld1a	556641	614.133	1262.18	1.02982	7.94116e-38	2.11425e-36
ENSDARG00000029766	nr1i2	565875	7.36747	36.6476	1.71188	7.54826e-05	0.00025609
ENSDARG00000104138	igfbp7		14.6142	111.329	2.18485	1.20017e-07	5.79962e-07
ENSDARG00000063539	slc25a15a	791156	4.56075	21.6135	1.35909	0.00468478	0.0116151
ENSDARG00000102992	btr20	678596	2.69324	13.5461	1.13819	0.0169612	0.0365764
ENSDARG00000100592	slc8a2b	567212	2.09159	14.1943	1.25957	0.00845462	0.0196737
ENSDARG00000103647	gpc5a		5.4585	20.1482	1.19914	0.0108458	0.0246108
ENSDARG00000039943	fam46ba	777768	21.205	97.5928	1.76261	1.96859e-06	8.21484e-06
ENSDARG00000004363	lhfp	494110	18.5391	55.4378	1.31553	0.000153215	0.000496621
ENSDARG00000098439	nr1h3	548341	524.795	1150.16	1.11308	1.68968e-32	3.77369e-31
ENSDARG00000068981	glceb	100007670	372.447	849.977	1.16544	9.26401e-29	1.78714e-27
ENSDARG00000098845	lrp12	100034487	397.37	1036.39	1.35001	3.01139e-29	5.98055e-28
ENSDARG00000015891	ptprea	100499203	18.243	115.915	2.33318	2.49753e-14	2.19653e-13
ENSDARG00000091574	suox	566675	90.9034	196.098	1.0613	7.28118e-07	3.22431e-06
ENSDARG00000075670	rereb	799473	45.9982	309.614	2.55157	6.87986e-32	1.51063e-30
ENSDARG00000034700	vegfab	558154	7.57847	73.6135	2.60976	4.91508e-10	2.9969e-09
ENSDARG00000098155	CT583728.1		31.137	128.334	1.83317	6.38643e-09	3.49982e-08
ENSDARG00000045658	msrb3	415184	15.09	41.8917	1.1537	0.00280297	0.00729951
ENSDARG00000079891	dnajc6	796345	318.508	708.331	1.13045	1.00886e-19	1.27113e-18
ENSDARG00000002795	meis3	81885	8.65335	64.2201	2.04467	2.194e-06	9.09916e-06
ENSDARG00000096654	si:dkey-119m7.8		1.35753	24.7037	2.26522	1.22673e-05	4.61549e-05
ENSDARG00000059442	smtnb		87.9405	209.226	1.18613	5.86727e-10	3.54649e-09
ENSDARG00000040442	prtgb		10.5867	40.0318	1.34575	0.00318537	0.00819274
ENSDARG00000018393	kank2	571549	12.7154	36.905	1.12494	0.00699683	0.0166563
ENSDARG00000062173	camsap2a	562741	0	13.0307	1.71472	9.14137e-05	0.000306259
ENSDARG00000062178	fam65a	566573	705.676	1693.55	1.24244	3.68549e-45	1.24175e-43
ENSDARG00000027249	btg1	114432	409.59	1061.43	1.31392	2.67018e-14	2.34415e-13
ENSDARG00000099365	evx1		45.8204	113.7	1.02476	0.0127363	0.0284161
ENSDARG00000096359	eppk1	101885652	52.9117	116.441	1.03126	6.16287e-05	0.000211549
ENSDARG00000068398	cep126	561486	10.4401	43.7019	1.54363	0.00024471	0.000768461
ENSDARG00000083312	AC024175.21		6.73383	90.7767	2.92429	1.77221e-13	1.43228e-12
ENSDARG00000024537	emilin1a	566473	3.77649	20.5037	1.34724	0.00574091	0.0139729
ENSDARG00000069427	nkain2		0	10.4626	1.44256	0.000436549	0.00131206
ENSDARG00000059933	plpp3	557680	31.3243	98.2834	1.49003	2.41197e-07	1.12709e-06
ENSDARG00000074796	dbf4	799015	355.069	889.56	1.29962	9.29564e-35	2.27069e-33
ENSDARG00000079440	coro2ba	560235	8.12263	37.009	1.27187	0.00809026	0.0189205
ENSDARG00000053449	pyya	30211	0	7.06222	1.16453	0.00275794	0.00719088
ENSDARG00000019353	sparc	321357	29.9199	85.1167	1.1673	0.00274283	0.00715721
ENSDARG00000044023	nkl.4	335563	0	9.54184	1.35329	0.00074637	0.00215859
ENSDARG00000011298	atf7a	566279	53.1238	133.824	1.12893	0.000465309	0.00139251
ENSDARG00000061165	slc6a4a	664719	14.0598	183.156	3.14888	5.37167e-22	7.63997e-21
ENSDARG00000063149	tmtc1	555449	5.17296	73.0256	2.63252	3.4025e-09	1.9063e-08
ENSDARG00000024431	CABZ01069595.1		62.1969	197.016	1.4569	7.14838e-07	3.16909e-06
ENSDARG00000026482	arhgap12b	393848	371.5	1150.18	1.61152	1.39643e-66	8.21961e-65
ENSDARG00000039666	tsta3	494077	41.8289	105.194	1.25253	2.82523e-06	1.15432e-05
ENSDARG00000075209	p4htm	799930	3.3451	16.0111	1.17322	0.0144062	0.0316357
ENSDARG00000056530	cpamd8	100151400	2.41896	74.4386	3.46576	9.28258e-14	7.67669e-13
ENSDARG00000035889	zbtb8b	550243	266.074	682.343	1.33157	6.06705e-33	1.38507e-31
ENSDARG00000035887	zgc:91944	436941	62.0416	192.533	1.54863	3.71386e-13	2.92646e-12
ENSDARG00000068582	rnf44	767686	382.892	937.636	1.2352	3.34317e-13	2.64396e-12
ENSDARG00000068637	si:ch211-281l24.3	798456	17.8051	125.956	2.44711	1.00405e-15	9.68464e-15
ENSDARG00000088807	klhl22	100333714	0.938489	19.0423	1.87515	0.000300954	0.00093146
ENSDARG00000015337	comta	561372	3.41892	108.128	3.7824	1.22669e-19	1.53864e-18
ENSDARG00000040815	tsku	325958	104.776	271.15	1.31036	3.66035e-14	3.16787e-13
ENSDARG00000041071	jagn1a	449830	3.41892	70.6854	3.1534	5.4722e-13	4.26387e-12
ENSDARG00000045946	sec24d		625.423	1345.08	1.09936	4.96074e-32	1.09788e-30
ENSDARG00000075565	lzts1		2.48043	18.4222	1.3919	0.00485966	0.0120075
ENSDARG00000075564	fam13a	559330	18.8374	285.513	1.47778	0.000661087	0.00193109
ENSDARG00000089767	rnf130	553950	18.191	43.8854	1.03748	0.00489682	0.0120917
ENSDARG00000078619	pnp5a	791647	85.4255	337.876	1.83009	5.45357e-16	5.37979e-15
ENSDARG00000040387	mmd	641478	201.562	702.522	1.78758	3.02109e-41	9.02722e-40
ENSDARG00000104530	ZNF609		677.688	1511.93	1.14404	3.4014e-43	1.08258e-41
ENSDARG00000055991	hmbsb	338290	193.937	445.353	1.166	6.9545e-18	7.85123e-17
ENSDARG00000060626	dgkaa	724010	69.2283	425.095	2.53151	1.24094e-52	5.08395e-51
ENSDARG00000103533	clec14a	327325	4.28358	24.175	1.37413	0.00443284	0.0110535
ENSDARG00000101394	fam69b	567731	7.4366	29.5073	1.44213	0.00124853	0.00347018
ENSDARG00000037362	scube2	503728	337.69	798.1	1.22651	3.12378e-33	7.1972e-32
ENSDARG00000062082	hipk3b	569156	72.1176	184.817	1.26316	6.45421e-09	3.53597e-08
ENSDARG00000074362	FUT9	100124609	1.40773	24.2675	1.8908	0.000191426	0.000611851
ENSDARG00000074365	zgc:171901	556292	72.6541	174.737	1.17767	1.6336e-07	7.792e-07
ENSDARG00000036965	rnf24	492480	10.1309	30.5447	1.18979	0.00476769	0.0118027
ENSDARG00000006719	specc1la	561775	390.177	878.441	1.16831	1.03547e-26	1.82958e-25
ENSDARG00000098221	st8sia1	553210	7.87746	25.8497	1.2107	0.00583149	0.0141669
ENSDARG00000098224	tmem56b	449652	112.765	338.014	1.54267	7.01779e-22	9.92342e-21
ENSDARG00000017140	zgc:63587	393431	270.717	706.577	1.3747	2.6193e-34	6.26516e-33
ENSDARG00000044525	pparda	30750	88.0595	278.36	1.61493	6.30852e-19	7.54936e-18
ENSDARG00000008377	epn2	560542	421.587	1170.34	1.43062	3.84552e-30	7.89382e-29
ENSDARG00000078076	nab2	100005680	17.418	82.2006	1.87844	5.93391e-08	2.95742e-07
ENSDARG00000079385	si:ch211-235m3.5	101884886	1.18438	52.4242	3.12991	5.8747e-09	3.22753e-08
ENSDARG00000078803	gas2l1	572219	3.29489	40.0172	2.21662	3.96893e-06	1.58969e-05
ENSDARG00000020834	si:dkey-230p4.1	564101	230.46	2006.33	2.42127	2.10641e-09	1.21105e-08
ENSDARG00000006266	stat1a	30768	135.631	370.656	1.34338	1.08681e-09	6.42224e-09
ENSDARG00000024006	rprmb	393779	2.23454	15.1967	1.26684	0.010861	0.0246424
ENSDARG00000100946	si:ch211-212k18.9	100334500	1.17311	13.7916	1.35096	0.00618415	0.0149383
ENSDARG00000100947	mafk	415133	29.092	78.9564	1.19917	0.000304076	0.000940229
ENSDARG00000062785	adpgk2	566398	62.3049	142.533	1.02846	0.000640802	0.0018766
ENSDARG00000042824	nfe2l2a	360149	41.9565	114.416	1.32523	6.07182e-07	2.71772e-06
ENSDARG00000081938	AC024175.13		11.2131	168.768	3.46934	1.34863e-28	2.57121e-27
ENSDARG00000036754	hmgn3	492345	4.71498	24.0462	1.39706	0.00345465	0.00882725
ENSDARG00000086057	CABZ01112317.1		23.919	81.4283	1.50104	3.73918e-06	1.50259e-05
ENSDARG00000077777	tmsb4x	793949	564.934	1351.47	1.23981	2.52533e-45	8.56769e-44
ENSDARG00000077778	adamts9		21.6594	86.6184	1.55879	6.51638e-05	0.000223057
ENSDARG00000102565	vasnb	100004428	1.65362	14.4103	1.37534	0.00567562	0.0138261
ENSDARG00000039579	cfd	553553	0.938489	15.5359	1.40707	0.00363506	0.00924111
ENSDARG00000030364	angpt1	114407	4.6033	26.8759	1.47003	0.00237427	0.00626831
ENSDARG00000031678	col5a2a	564821	8.76503	64.522	1.9284	1.95467e-05	7.168e-05
ENSDARG00000008275	klhl24b	393412	32.7739	107.831	1.49175	4.6974e-07	2.12936e-06
ENSDARG00000015425	slc24a4a	550467	356.97	878.788	1.25693	3.81969e-19	4.65074e-18
ENSDARG00000059529	KIAA0895L	562097	143.347	320.034	1.11303	5.08027e-12	3.65398e-11
ENSDARG00000040564	hnrnpul1	406555	587.225	1377.45	1.21967	7.16681e-45	2.38592e-43
ENSDARG00000016994	ssrp1b	449949	2.41896	14.24	1.18051	0.0172328	0.0370803
ENSDARG00000011422	ryr1a	798565	0	8.21626	1.02621	0.00368769	0.00935543
ENSDARG00000023963	tpm4a	324244	64.0302	228.682	1.66702	1.47715e-11	1.02473e-10
ENSDARG00000045522	si:dkeyp-89c11.3	557032	9.849	82.53	2.2866	2.45351e-08	1.27044e-07
ENSDARG00000045524	lamb1b	556605	15.2176	51.8175	1.1439	0.0130588	0.0290424
ENSDARG00000101293	PKN2	567134	720.505	1615.34	1.15461	5.70986e-44	1.86281e-42
ENSDARG00000099555	foxo1a	768121	86.0061	356.38	1.93527	4.30535e-25	7.10002e-24
ENSDARG00000054973	itsn2b	445153	1662.48	3416.73	1.03552	2.25494e-81	1.76264e-79
ENSDARG00000039008	zgc:85858	405879	41.8623	105.081	1.1788	2.48029e-05	8.96096e-05
ENSDARG00000102176	pla1a		3.59098	19.5431	1.25738	0.00834556	0.0194501
ENSDARG00000057995	arl15b	560030	137.293	434.458	1.61049	6.86826e-25	1.1213e-23
ENSDARG00000005834	gatad2b	562045	107.246	324.948	1.43861	7.41346e-08	3.65751e-07
ENSDARG00000035809	col1a1b	325675	54.3151	227.73	1.77527	2.79483e-08	1.43728e-07
ENSDARG00000104221	sat2b	436827	0	8.94227	1.28904	0.0010897	0.00306269
ENSDARG00000087688	KLHL29	100537703	140.94	398.002	1.42321	3.55244e-17	3.83758e-16
ENSDARG00000034043	irx5a	573346	1.65362	12.8846	1.33169	0.00767893	0.0180754
ENSDARG00000034042	dnal1	445048	11.8253	65.0413	1.96462	1.48759e-07	7.13209e-07
ENSDARG00000086490	si:dkey-92f12.2	796761	29.5394	178.145	2.34546	3.89676e-20	5.01981e-19
ENSDARG00000069295	bcl6ab	100001936	121.564	306.677	1.3015	5.14837e-10	3.13425e-09
ENSDARG00000035390	tnpo1	562607	318.897	976.122	1.58418	2.2368e-35	5.57546e-34
ENSDARG00000038012	fam83fa	566780	201.721	417.82	1.04475	6.84849e-12	4.86666e-11
ENSDARG00000042221	mthfd1l	100034522	0.703867	10.1162	1.15849	0.0139976	0.0308668
ENSDARG00000019549	cds1	100002015	38.8162	134.071	1.5218	1.76009e-06	7.39867e-06
ENSDARG00000061591	abcb10	100003744	174.441	375.419	1.08937	9.27597e-14	7.67447e-13
ENSDARG00000057465	gfpt1		145.197	856.985	2.44142	2.04807e-42	6.35539e-41
ENSDARG00000044029	efnb3a	564234	19.694	58.8098	1.32959	0.000130099	0.000426149
ENSDARG00000076529	mn1a	572147	1.53068	17.5355	1.75378	0.000566389	0.00167196
ENSDARG00000092858	si:ch1073-126c3.2	555816	12.2829	32.8782	1.12911	0.00758167	0.017868
ENSDARG00000051926	plag1	561450	2.41896	37.9129	2.5356	1.33486e-07	6.42507e-07
ENSDARG00000063352	inpp4aa	664741	261.701	585.692	1.15281	3.55005e-22	5.08615e-21
ENSDARG00000078217	cblc	565383	0	7.2232	1.17159	0.00256024	0.00671843
ENSDARG00000019976	idi1	553513	99.2206	507.226	2.31428	2.53363e-54	1.0787e-52
ENSDARG00000062008	hs2st1b	100151174	82.972	174.054	1.01027	3.87502e-07	1.77343e-06
ENSDARG00000054837	zgc:136870	664693	0.938489	10.6584	1.19738	0.0137059	0.0303048
ENSDARG00000039701	emx2	30537	3.77649	34.6913	2.01509	2.01613e-05	7.37171e-05
ENSDARG00000080329	AC024175.3		5.887	61.2347	2.69286	6.23724e-11	4.1109e-10
ENSDARG00000052368	cltb	100329879	14.2639	35.7029	1.07567	0.00690041	0.0164609
ENSDARG00000060093	dapk1	558314	861.088	1780.45	1.02912	5.19698e-28	9.66312e-27
ENSDARG00000071331	ryr3		7.64104	24.3294	1.15224	0.0107502	0.024428
ENSDARG00000071333	si:ch211-212d10.2	557710	17.8985	50.1785	1.1818	0.00228034	0.00604237
ENSDARG00000030116	susd6	336888	33.1522	106.824	1.48101	4.69682e-07	2.12936e-06
ENSDARG00000086569	zgc:172051	100007431	5.57018	18.9687	1.09811	0.0212894	0.0448316
ENSDARG00000059801	pdzd2	569088	17.7257	292.193	1.59581	0.00027143	0.000846248
ENSDARG00000059804	fam134c	566014	143.784	335.535	1.15837	2.5672e-11	1.74741e-10
ENSDARG00000073764	si:ch211-113j14.1	558239	0.938489	12.9449	1.31604	0.0068224	0.0162967
ENSDARG00000073768	tmem125a	100005879	13.508	39.3554	1.27459	0.00128059	0.0035527
ENSDARG00000079308	tor3a	792835	13.3767	42.9947	1.32688	0.000542921	0.00160827
ENSDARG00000042409	si:ch211-251j10.3	799483	75.1135	280.902	1.81586	5.33548e-20	6.82959e-19
ENSDARG00000094469	si:ch211-148l7.4	563603	217.841	711.957	1.69484	2.20955e-43	7.10181e-42
ENSDARG00000078557	si:ch211-57n23.4	799595	7.45842	32.2598	1.54362	0.000303096	0.000937349
ENSDARG00000043436	si:dkey-5n18.1	570444	0	8.82937	1.3495	0.000887701	0.00253063
ENSDARG00000015822	sesn3	406840	1.87698	31.2038	2.03124	5.24437e-05	0.000181809
ENSDARG00000078887	atp10d	571658	363.787	1025.1	1.46664	1.30751e-43	4.23036e-42
ENSDARG00000044808	slc4a4b	561618	17.2343	50.2216	1.23555	0.00169362	0.00459422
ENSDARG00000097372	si:ch211-139d20.3		27.9225	73.3409	1.26048	5.51197e-05	0.000190612
ENSDARG00000056679	morc3a	553447	257.343	826.058	1.65835	5.31223e-50	2.02757e-48
ENSDARG00000097088	si:dkey-60d5.3		2.13233	14.5822	1.38723	0.00519687	0.0127761
ENSDARG00000022650	cyp2ad3	569245	25.6047	111.952	1.88543	3.63026e-08	1.85132e-07
ENSDARG00000060705	nsd1b	564592	67.7017	206.653	1.534	5.41127e-13	4.21807e-12
ENSDARG00000071685	slco5a1	556735	36.8974	89.9437	1.12703	0.000100185	0.000333701
ENSDARG00000011809	mical1	568573	117.301	439.513	1.79971	3.54175e-19	4.32581e-18
ENSDARG00000036066	si:dkey-78a14.4	794381	10.7438	41.1176	1.53253	0.000135128	0.000441585
ENSDARG00000081758	AC024175.12		1.42846	36.6893	2.86501	7.64032e-08	3.76373e-07
ENSDARG00000104555	sh2d3cb	394051	1.80495	82.7744	3.92086	5.80872e-12	4.14588e-11
ENSDARG00000037000	fkbp11	368823	87.9129	223.979	1.30925	1.21264e-10	7.80292e-10
ENSDARG00000081280	AC024175.8		0.999961	28.4099	2.55469	2.05155e-06	8.54462e-06
ENSDARG00000074244	arhgef10lb	567649	12.6609	157.639	2.77869	5.57248e-12	3.986e-11
ENSDARG00000036848	slc43a2a	393221	83.5584	261.943	1.60431	3.48435e-18	4.00772e-17
ENSDARG00000005989	rgl1	402933	511.284	1185.11	1.07119	0.000638939	0.00187198
ENSDARG00000017773	slc16a12a	557762	0.469245	7.71442	1.04697	0.0208399	0.0439752
ENSDARG00000032405	zgc:85975	406549	17.0379	51.0686	1.22337	0.0019029	0.0051127
ENSDARG00000079912	rapgefl1	100149497	0	11.0943	1.40772	0.00044026	0.001322
ENSDARG00000010207	smad3b	326283	43.7171	148.108	1.67033	3.90788e-12	2.84423e-11
ENSDARG00000075963	mhc1uba	30757	103.471	301.995	1.48996	2.61445e-18	3.03936e-17
ENSDARG00000077237	rfx7	560368	124.107	294.14	1.1619	3.70417e-08	1.88704e-07
ENSDARG00000092407	CR391916.1	799827	26.7116	63.8349	1.11727	0.000415207	0.00125254
ENSDARG00000012586	fmnl2a	100006456	48.1614	308.844	2.54486	1.43222e-36	3.67303e-35
ENSDARG00000052155	lrrc8ab	557928	14.8346	79.0571	1.95825	7.02229e-08	3.47065e-07
ENSDARG00000057913	syt11a	406769	7.96075	175.303	3.62879	2.54804e-24	4.04828e-23
ENSDARG00000070455	tmem245		287.878	674.854	1.1873	6.80395e-16	6.65147e-15
ENSDARG00000070453	gch1	100192219	25.8127	73.2564	1.35321	3.28416e-05	0.00011688
ENSDARG00000029476	ldlra	387529	11.1953	82.0184	2.10668	4.55277e-07	2.06908e-06
ENSDARG00000029474	camk1b	794026	21.5833	107.203	1.94677	3.96271e-09	2.20625e-08
ENSDARG00000076850	si:ch211-157b11.14	799552	6.79421	51.679	2.33744	2.32294e-08	1.2058e-07
ENSDARG00000071494	fshr	195820	2.35749	75.5762	3.49176	5.96158e-14	5.05209e-13
ENSDARG00000003705	prnprs3	503702	46.9472	111.334	1.06719	0.000445331	0.0013364
ENSDARG00000074168	fam208b		431.058	1013.7	1.21143	1.49735e-24	2.4123e-23
ENSDARG00000039325	pmepa1	436853	21.6205	77.6188	1.49109	3.61079e-05	0.000127969
ENSDARG00000034896	ldb2b	30578	0	20.7667	2.47949	1.20247e-06	5.1702e-06
ENSDARG00000088768	PQLC1	101883969	64.5675	269.332	1.91814	4.45959e-19	5.39958e-18
ENSDARG00000088497	BX571757.1		63.0405	223.791	1.75774	3.77459e-18	4.3339e-17
ENSDARG00000010794	tfeb	562289	10.5802	34.9689	1.38464	0.000564645	0.00166749
ENSDARG00000093594	CR536604.1		0.703867	9.32587	1.16526	0.015119	0.0330375
ENSDARG00000044183	prkab1a	436905	64.4445	141.427	1.03189	1.27875e-05	4.79548e-05
ENSDARG00000090977	ifit12	567504	1.18438	10.2411	1.06557	0.0236845	0.0493435
ENSDARG00000042934	ctgfa	321449	103.218	669.324	2.46678	2.5563e-22	3.68673e-21
ENSDARG00000011672	sema3b	567064	26.2358	213.119	2.73755	6.84974e-26	1.16297e-24
ENSDARG00000011671	pde6b	559332	12.2633	38.4001	1.28815	0.00121798	0.00339249
ENSDARG00000094377	samd10b	100147927	11.0399	40.59	1.49503	0.000145726	0.00047384
ENSDARG00000052059	PAQR9	101886606	0	9.42525	1.44525	0.000536904	0.00159189
ENSDARG00000052057	pcolceb	794872	2.36876	48.9175	2.50689	3.73233e-07	1.71134e-06
ENSDARG00000056961	ccdc30	563478	96.3611	338.699	1.72137	5.21064e-22	7.42175e-21
ENSDARG00000056966	nek7	445223	753.637	1573.68	1.04823	6.79852e-42	2.05343e-40
ENSDARG00000078560	slc9a5	565213	9.63221	26.2416	1.0603	0.0157266	0.0342084
ENSDARG00000061656	ptpdc1a	565773	186.004	505.23	1.41863	1.31827e-23	2.03007e-22
ENSDARG00000003398	rbpja	386772	908.308	2074.1	1.17955	4.70958e-54	1.97924e-52
ENSDARG00000003395	col4a3		0.469245	17.1649	1.883	0.000310352	0.000958423
ENSDARG00000053010	lpcat2	553683	17.6028	68.5638	1.29509	0.00463605	0.0115074
ENSDARG00000060016	nsd1a	556086	497.379	1014.33	1.00292	1.30131e-17	1.44407e-16
ENSDARG00000104495	pltp	445125	3.88817	48.3557	2.41709	1.44288e-07	6.92966e-07
ENSDARG00000063097	scube1	797832	12.4262	49.9784	1.15542	0.0162315	0.0351703
ENSDARG00000063095	ctsf	565588	18.1633	91.0775	2.02046	8.06567e-10	4.81869e-09
ENSDARG00000101618	ube2c	100331919	187.387	492.083	1.35504	5.70917e-23	8.45217e-22
ENSDARG00000014806	hacd2	334121	281.231	797.776	1.47932	2.63237e-40	7.59849e-39
ENSDARG00000075608	mical2a		2.74344	16.8379	1.11365	0.0173758	0.0373387
ENSDARG00000098295	efna3b	117506	3.59098	18.4507	1.24957	0.00893722	0.0206761
ENSDARG00000009217	tom1l2	560327	349.334	789.938	1.14465	1.60282e-19	2.00014e-18
ENSDARG00000016513	setd3	337193	548.346	1526.43	1.46132	2.92134e-59	1.44896e-57
ENSDARG00000023217	crema	555432	20.7009	55.2481	1.11601	0.00364054	0.00925142
ENSDARG00000013360	sh3gl3a		14.3908	96.8396	2.0287	1.22293e-06	5.24895e-06
ENSDARG00000100725	ephb4a	30688	103.535	272.368	1.35862	3.07591e-14	2.68466e-13
ENSDARG00000054150	cx23	541419	1.2033	26.0899	2.19203	2.34034e-05	8.47414e-05
ENSDARG00000101452	CABZ01088700.1		2.58084	31.1379	1.74484	0.000415692	0.00125381
ENSDARG00000101457	cdc42ep4a	431730	95.4674	234.548	1.26035	1.96717e-09	1.13433e-08
ENSDARG00000080401	AC024175.5		4.52001	53.685	2.71526	4.80835e-10	2.9364e-09
ENSDARG00000052244	zgc:158564	553264	2129.64	4296.41	1.00782	4.04143e-63	2.15786e-61
ENSDARG00000102379	si:zfos-80g12.1	100149048	671.536	1735.62	1.3544	2.06179e-62	1.07444e-60
ENSDARG00000089917	sh3tc2	100535152	3.67247	77.7285	3.33629	1.63483e-14	1.45614e-13
ENSDARG00000062977	samd13	767772	161.581	361.104	1.12502	6.54994e-14	5.51482e-13
ENSDARG00000097825	BX465227.1		94.8664	224.369	1.15543	2.8697e-06	1.17126e-05
ENSDARG00000097827	lrp1aa		195.523	1399.72	2.46078	7.6256e-14	6.37653e-13
ENSDARG00000077101	zbtb10	566269	153.728	442.253	1.39684	2.26668e-08	1.1787e-07
ENSDARG00000041141	cryba1a	436683	2.838	18.4169	1.32886	0.00705418	0.0167725
ENSDARG00000077812	slc5a3b	568338	97.9339	345.307	1.74218	3.35182e-22	4.81273e-21
ENSDARG00000089071	ushbp1	100148935	7.99969	54.4007	1.81923	6.8456e-05	0.000233549
ENSDARG00000095070	si:ch211-67e16.2	101886406	7.49988	34.9004	1.58991	0.000390383	0.00118277
ENSDARG00000040237	mef2d	30580	236.886	690.581	1.49405	2.31328e-24	3.68728e-23
ENSDARG00000016490	rab11fip3		19.3677	67.5671	1.48376	3.70707e-05	0.000131048
ENSDARG00000088307	mkl2a	793956	8.65226	37.4353	1.62819	6.11991e-05	0.000210148
ENSDARG00000079412	ftr02		0	14.7511	2.01486	1.99113e-05	7.28936e-05
ENSDARG00000061131	kif21a	566481	1.2033	13.62	1.40898	0.00235844	0.00622904
ENSDARG00000095912	si:dkey-229b18.3	558830	1014.82	2086.21	1.02497	3.31991e-40	9.54083e-39
ENSDARG00000063190	zranb1b	777720	274.019	892.228	1.69036	3.26233e-52	1.32818e-50
ENSDARG00000067850	jund	564873	108.308	593.881	2.3579	6.70527e-54	2.8119e-52
ENSDARG00000003835	stom	81534	70.5015	350.559	2.07877	9.55892e-13	7.32551e-12
ENSDARG00000074611	wdr37	558075	2.81547	215.946	1.31586	3.20088e-05	0.000114166
ENSDARG00000104762	BX530097.1		0.703867	10.1553	1.26805	0.00955023	0.0219436
ENSDARG00000032627	SCYL2	557149	367.646	943.411	1.32734	6.84387e-25	1.11825e-23
ENSDARG00000032623	rcan3	325356	2.14179	15.8528	1.46729	0.00287405	0.00746473
ENSDARG00000033978	nxn	553621	255.167	701.559	1.41152	2.23039e-20	2.92329e-19
ENSDARG00000069048	serpinf1	447800	0	35.2362	3.13146	1.55728e-08	8.22272e-08
ENSDARG00000098420	SNTA1		0	9.12744	1.36387	0.000784029	0.00225881
ENSDARG00000003008	prkcea	100005075	124.678	299.177	1.20987	3.26755e-12	2.40325e-11
ENSDARG00000069953	kcnq5b	568646	13.3567	76.2034	2.09985	9.80731e-09	5.28119e-08
ENSDARG00000032369	btbd6b	553533	504.239	1144.73	1.1766	5.16673e-37	1.3391e-35
ENSDARG00000071208	wnt4a	30123	7.12267	88.5253	2.72084	2.25236e-11	1.54008e-10
ENSDARG00000071209	oprl1	402851	16.6545	72.8832	1.76768	6.59769e-07	2.94309e-06
ENSDARG00000068601	atmin	571606	103.031	357.13	1.7487	3.28051e-22	4.7138e-21
ENSDARG00000059029	mmp28	100005670	0	10.8946	1.63138	0.00018744	0.000599892
ENSDARG00000105088	tenm4	30156	122.859	479.895	1.86954	4.11241e-27	7.36616e-26
ENSDARG00000040869	upp1	503707	3.29598	18.5607	1.30832	0.00792137	0.0185811
ENSDARG00000040864	si:dkey-286j15.1	796378	94.5111	219.398	1.12423	2.05962e-07	9.69623e-07
ENSDARG00000007597	bloc1s4		151.33	357.729	1.22267	4.68956e-14	4.01945e-13
ENSDARG00000098984	pid1	541377	21.1112	65.5524	1.38166	5.28633e-05	0.00018314
ENSDARG00000055255	pitpnm3	337272	63.485	153.679	1.20263	3.74939e-08	1.90859e-07
ENSDARG00000056783	raraa	30680	53.9644	159.378	1.4587	2.8187e-10	1.75815e-09
ENSDARG00000053091	DAB2	368323	100.505	356.319	1.74505	1.75106e-23	2.66921e-22
ENSDARG00000071049	si:dkey-119m7.4	560629	5.74513	69.0162	2.67411	3.91431e-10	2.41533e-09
ENSDARG00000105239	ecm1b	100332249	481.464	2423.37	2.28724	4.43865e-97	4.33701e-95
ENSDARG00000103691	RFX7	100538179	219.46	671.479	1.54941	1.23845e-23	1.91167e-22
ENSDARG00000103697	arnt2	64277	322.279	748.714	1.1621	1.03708e-12	7.92595e-12
ENSDARG00000018524	midn	323713	591.144	1672.74	1.47975	1.03845e-51	4.14151e-50
ENSDARG00000101690	si:ch73-158p21.2	100535934	16.7218	42.1024	1.0779	0.00420596	0.0105348
ENSDARG00000100342	zgc:158464		49.8577	239.584	2.18903	1.27725e-24	2.06451e-23
ENSDARG00000076060	diaph2	556029	45.1051	151.733	1.47103	1.20333e-05	4.5344e-05
ENSDARG00000035184	tmem150ab	393483	53.2395	133.328	1.23826	1.79669e-06	7.541e-06
ENSDARG00000102277	lama1	569971	78.121	492.593	2.57023	1.88373e-53	7.8157e-52
ENSDARG00000069360	ppp3r1b	447814	387.955	816.389	1.04459	4.50122e-17	4.81989e-16
ENSDARG00000080020	il13ra1	799475	75.8628	329.459	2.01358	7.84147e-29	1.52173e-27
ENSDARG00000017174	dlx2b	30557	9.24445	33.4807	1.38672	0.000883936	0.00252026
ENSDARG00000036878	sh3bgrl2	431744	2.1116	20.0701	1.18454	0.0121008	0.0271248
ENSDARG00000095704	si:dkey-4c15.13		2.24581	13.4322	1.13464	0.0210773	0.0444377
ENSDARG00000053939	tgfa	100034402	301.442	819.387	1.42121	1.22771e-35	3.07983e-34
ENSDARG00000018817	bdnf	58118	14.4789	56.6879	1.52874	8.8458e-05	0.000296916
ENSDARG00000055429	kat6b	568932	364.185	1261.17	1.7744	4.57939e-65	2.60146e-63
ENSDARG00000030326	efna1a	393569	9.2532	54.6408	1.74921	9.37457e-05	0.000313426
ENSDARG00000020845	tns1b	555362	42.1024	104.705	1.15095	7.11033e-05	0.000242031
ENSDARG00000036222	npy	30281	1.65362	13.2805	1.26296	0.0103816	0.0236508
ENSDARG00000076928	tet2	101887161	5.86808	28.5589	1.55846	0.000583696	0.00172097
ENSDARG00000076923	kazna	100003663	352.036	757.223	1.0785	1.71206e-23	2.61179e-22
ENSDARG00000103714	rab6a	793785	290.78	602.586	1.03487	3.14343e-16	3.15344e-15
ENSDARG00000103713	cd248a	323364	3.35745	22.8077	1.47548	0.00265444	0.00694419
ENSDARG00000034173	prkcq	555521	10.5991	29.604	1.12384	0.0102509	0.0233858
ENSDARG00000042874	phlda2	553622	120.892	580.023	2.2198	1.23001e-58	5.96449e-57
ENSDARG00000105000	c2cd2	100332559	16.2467	52.1259	1.2991	0.00118098	0.0032965
ENSDARG00000059963	polk	562749	276.289	583.147	1.06393	1.47529e-20	1.94404e-19
ENSDARG00000077726	nocta	572044	98.4057	339.401	1.64795	3.12993e-13	2.48033e-12
ENSDARG00000031683	fosab	394198	329.337	2681.93	2.96914	3.77189e-154	6.82503e-152
ENSDARG00000077897	znf296	553232	505.499	1021.77	1.00303	3.79553e-28	7.12509e-27
ENSDARG00000002463	arhgef37	101883655	124.44	288.556	1.15267	1.87488e-10	1.18457e-09
ENSDARG00000042029	mbd3b	321217	74.3707	227.964	1.5545	5.91452e-16	5.82274e-15
ENSDARG00000045036	cdc42ep4b	100002938	790.427	2092.09	1.39092	1.6544e-64	9.18475e-63
ENSDARG00000041644	TMEM27	402976	7.63338	77.0078	2.6411	8.71684e-12	6.16297e-11
ENSDARG00000019307	dusp5	114436	177.809	554.219	1.5645	4.61926e-21	6.27308e-20
ENSDARG00000061205	stag1a	564533	6.71201	36.0395	1.75034	8.57791e-05	0.000288519
ENSDARG00000078258	GGT5	100333757	5.2457	22.8399	1.2326	0.0102588	0.0234006
ENSDARG00000077298	gas1a	796318	22.8947	63.4877	1.19658	0.000894864	0.0025503
ENSDARG00000023933	skila	100007653	143.618	431.089	1.51519	1.93015e-16	1.96864e-15
ENSDARG00000054058	h1fx	322508	27.5802	118.138	1.82895	1.20549e-09	7.09568e-09
ENSDARG00000054050	vsig8a	550503	0	11.3507	1.60544	0.000192317	0.000614296
ENSDARG00000027131	tmem169a	558357	18.7224	46.05	1.07501	0.00555064	0.0135571
ENSDARG00000088145	atg4db		110.936	279.84	1.27376	3.4701e-13	2.74212e-12
ENSDARG00000088140	hsd17b7	768185	3.76522	30.757	1.70844	0.000444121	0.00133318
ENSDARG00000035859	angptl4	492647	199.563	1846.12	2.89129	9.31072e-24	1.44062e-22
ENSDARG00000035858	cnn2	406658	187.143	439.049	1.201	2.51842e-14	2.2139e-13
ENSDARG00000033182	arl4ab	338267	43.5476	172.351	1.86873	2.79339e-14	2.44791e-13
ENSDARG00000089581	nhlrc2	100535163	204.045	450.139	1.08698	2.90334e-10	1.80922e-09
ENSDARG00000068683	chmp2ba	569532	7.3573	28.6663	1.13163	0.0184915	0.0394799
ENSDARG00000104259	CABZ01073167.1		1.67255	20.5305	1.8652	0.000199754	0.000637113
ENSDARG00000086450	tdg.2	558951	50.4611	123.093	1.21527	4.36722e-06	1.74314e-05
ENSDARG00000069795	zgc:154058	795538	0	13.1851	1.82294	5.64837e-05	0.000194984
ENSDARG00000031763	smad6b	564395	2.1116	17.4228	1.2209	0.012188	0.0273078
ENSDARG00000002353	tagapa	393842	5.88809	29.0286	1.41003	0.0028431	0.00739321
ENSDARG00000091419	nrarpa	353224	59.6833	357.512	2.36583	8.74719e-23	1.27947e-21
ENSDARG00000091418	snx17	568263	611.924	1393.69	1.16918	3.52664e-27	6.33434e-26
ENSDARG00000043548	atg4da	795933	238.315	593.789	1.2916	2.03679e-27	3.68887e-26
ENSDARG00000040080	fli1b	386723	3.4804	16.0218	1.14751	0.0197366	0.0418686
ENSDARG00000017446	camk1db	791176	2.59211	30.5851	2.15842	8.35078e-06	3.22066e-05
ENSDARG00000041560	si:dkey-102f14.5	557406	199.446	416.996	1.04803	9.77417e-15	8.81435e-14
ENSDARG00000059701	flii	560281	995.665	2064.51	1.03022	2.35917e-21	3.26739e-20
ENSDARG00000054632	fli1a	30619	6.01103	23.8623	1.18522	0.0129295	0.0287875
ENSDARG00000015176	ror1	568282	232.417	574.547	1.2748	4.51719e-22	6.44342e-21
ENSDARG00000025011	synj1	337236	544.203	1134.65	1.0564	1.87115e-28	3.53637e-27
ENSDARG00000051915	pde5ab	553270	51.3196	126.307	1.18123	4.66744e-06	1.85388e-05
ENSDARG00000038429	csrnp1b	322795	1036.63	2117.36	1.00843	2.4567e-20	3.2113e-19
ENSDARG00000060697	kmt2bb	566825	506.602	1728.7	1.73187	4.05484e-48	1.48667e-46
ENSDARG00000005586	zbtb20	568779	9.73732	76.2845	2.05553	3.49337e-06	1.40932e-05
ENSDARG00000061215	fam149b1	791183	86.6321	221.488	1.29795	5.97627e-12	4.26235e-11
ENSDARG00000101072	cnot6b	560386	638.174	1586.9	1.29326	7.49521e-39	2.0543e-37
ENSDARG00000038281	natd1	100002945	73.6832	196.488	1.3453	6.23066e-11	4.10859e-10
ENSDARG00000039486	bag3	445139	57.6747	157.943	1.37039	1.84844e-09	1.06807e-08
ENSDARG00000089138	si:ch1073-440b2.1	100000190	0	8.68059	1.27209	0.0012333	0.00343176
ENSDARG00000000666	creg2	492339	18.0586	77.1128	1.73297	9.86804e-07	4.2997e-06
ENSDARG00000010442	rnf11a	393996	108.077	379.612	1.75725	2.56777e-27	4.62909e-26
ENSDARG00000103008	BX324179.3		22.3127	74.9498	1.53602	1.46568e-06	6.2266e-06
ENSDARG00000090836	si:ch211-191d2.2	101882796	4.82557	29.5827	1.84256	6.23497e-05	0.000213854
ENSDARG00000077039	esama	799432	33.2192	72.7985	1.03531	0.000592697	0.00174593
ENSDARG00000078026	zcchc24	562028	7.97202	36.5228	1.32609	0.00518529	0.0127492
ENSDARG00000075898	spata7	793830	15.7342	74.19	1.84466	1.24331e-07	5.99329e-07
ENSDARG00000043361	nck2b	445098	393.195	949.576	1.25825	5.00895e-38	1.33905e-36
ENSDARG00000095891	si:ch73-30l9.1	798447	38.5187	123.122	1.53264	1.85177e-08	9.7069e-08
ENSDARG00000090971	cc2d2a	570250	228.138	479.194	1.03653	5.52291e-13	4.30166e-12
ENSDARG00000075301	gsdf	571289	38.2917	471.271	3.50032	2.00991e-78	1.4766e-76
ENSDARG00000078561	lrig2	571101	226.088	564.241	1.30224	1.21396e-26	2.13147e-25
ENSDARG00000061804	si:ch211-194e15.5	100034579	10.0789	32.0412	1.20748	0.0056384	0.013744
ENSDARG00000040123	zfpm2a	568996	46.1259	318.158	2.61504	9.32571e-32	2.03851e-30
ENSDARG00000013847	egfra	378478	22.9609	197.812	2.58668	5.44138e-14	4.63134e-13
ENSDARG00000013843	sept5a	335925	194.411	405.302	1.03839	3.8127e-13	3.00314e-12
ENSDARG00000099978	CABZ01078427.1	100332369	4.15118	20.5129	1.17678	0.0155152	0.0338127
ENSDARG00000011571	calcrlb	567131	39.1829	110.008	1.30967	1.39095e-05	5.19732e-05
ENSDARG00000025670	fstl3	557352	69.1122	285.323	1.87289	6.15327e-15	5.62955e-14
ENSDARG00000027529	hmox1a	791518	4.12279	37.0541	2.06219	8.06423e-06	3.11507e-05
ENSDARG00000060734	appl1	571540	133.642	302.427	1.07855	7.93832e-06	3.07007e-05
ENSDARG00000060885	znf592	571276	682.679	1709.76	1.30206	5.26027e-41	1.55752e-39
ENSDARG00000036094	pias1a	564496	43.3835	140.231	1.51373	1.36288e-08	7.22753e-08
ENSDARG00000036096	smad3a	58092	73.3282	204.977	1.42596	1.60178e-12	1.20438e-11
ENSDARG00000100266	CT583728.7		9.37686	97.2409	2.81456	2.69342e-14	2.36348e-13
ENSDARG00000063283	abi3b	566059	11.7987	57.0747	1.51521	0.00087168	0.00249004
ENSDARG00000101131	pbx1b	570960	3.07262	20.3374	1.44214	0.00338501	0.00866516
ENSDARG00000037059	slc44a2	324345	80.6858	196.987	1.19583	2.43751e-08	1.26249e-07
ENSDARG00000030006	SLC6A7	562050	17.2241	55.5462	1.37589	0.000133956	0.000437826
ENSDARG00000104569	CABZ01088484.1		0.888283	15.7909	1.65735	0.0010472	0.00295344
ENSDARG00000100616	CU019663.1		0.592189	14.0025	1.53386	0.00165552	0.00449943
ENSDARG00000070971	furinb	566591	149.22	344.384	1.15911	1.07314e-13	8.82255e-13
ENSDARG00000088656	si:ch211-212k18.6		1.80495	20.7759	1.43583	0.00149514	0.00409964
ENSDARG00000093460	gpr52	101884270	13.3898	40.2196	1.18449	0.00432396	0.0108082
ENSDARG00000044341	chst7	563748	4.69316	24.446	1.60348	0.000535309	0.00158765
ENSDARG00000030824	esyt2a	570012	304.435	777.621	1.33929	1.70864e-22	2.48255e-21
ENSDARG00000015472	gpc4	118437	404.403	938.646	1.20195	1.87933e-27	3.41002e-26
ENSDARG00000059333	si:ch211-285f17.1	562465	45.8411	159.649	1.68125	3.34664e-13	2.64563e-12
ENSDARG00000075919	ccser1	795160	331.799	916.288	1.44808	3.33554e-39	9.2986e-38
ENSDARG00000091127	klf15	335901	5.66473	81.2511	2.89057	1.59195e-12	1.19791e-11
ENSDARG00000074527	chst15	565523	85.6027	194.25	1.12088	2.28975e-07	1.07305e-06
ENSDARG00000090834	epor	751109	2.34622	18.1715	1.21195	0.0130307	0.0289898
ENSDARG00000041449	spred1	406513	91.2849	304.433	1.6487	4.33118e-18	4.93815e-17
ENSDARG00000018179	acvrl1	266753	1.17311	13.4159	1.34649	0.00652096	0.0156667
ENSDARG00000018178	pgm2	405822	11.5303	196.883	1.76634	9.29737e-05	0.000311005
ENSDARG00000015780	ankrd46b	402888	59.3691	285.949	2.16657	4.32347e-29	8.50849e-28
ENSDARG00000040717	macc1	558777	1548.83	3212.07	1.04294	8.42615e-56	3.71702e-54
ENSDARG00000056091	cttnbp2nlb	556247	8.82432	26.5553	1.18494	0.00780651	0.0183359
ENSDARG00000095852	CT574585.1		3.8267	22.3407	1.45068	0.00284504	0.00739727
ENSDARG00000038826	jph1b	556485	115.47	264.841	1.14049	4.07035e-09	2.26295e-08
ENSDARG00000095854	si:dkey-42i9.16		1.66309	19.2115	1.797	0.000356386	0.00108888
ENSDARG00000070406	BX511021.1		0.469245	7.79224	1.12009	0.0162756	0.0352535
ENSDARG00000103457	spg20b	751741	184.407	534.052	1.47227	7.71461e-21	1.03401e-19
ENSDARG00000076801	arap3	558931	248.459	546.27	1.07212	1.91813e-08	1.00386e-07
ENSDARG00000041299	zgc:110796	503755	0.469245	17.4186	1.96853	0.000214884	0.000682363
ENSDARG00000052957	plcd3a	569040	12.8991	47.7813	1.2105	0.00905297	0.0209068
ENSDARG00000086183	vkorc1	100000559	38.3303	93.465	1.18365	0.000138233	0.000451355
ENSDARG00000076111	GXYLT1		14.2453	60.6338	1.36068	0.00311399	0.00803029
ENSDARG00000038040	tpk1	450054	24.0278	55.7744	1.05402	0.00121058	0.00337332
ENSDARG00000102471	trak2	560810	215.331	510.47	1.22055	1.64021e-15	1.5628e-14
ENSDARG00000102478	ADAMTS7		2.33567	16.9316	1.52401	0.00168804	0.00458097
ENSDARG00000077994	b4galt2	100148828	0.703867	40.4826	3.12499	5.82679e-08	2.90774e-07
ENSDARG00000073696	frmd8	559410	631.493	1466	1.19525	2.00027e-42	6.22442e-41
ENSDARG00000032532	arpp19a	393603	43.4676	159.078	1.72032	1.04906e-09	6.21047e-09
ENSDARG00000075593	trim71	561754	1231.13	3117.6	1.32428	4.51107e-66	2.60815e-64
ENSDARG00000071879	tgfb2l	559723	3.65355	39.7231	2.27382	7.8774e-07	3.4726e-06
ENSDARG00000087911	psme4a	793897	118.021	398.902	1.65092	3.88477e-16	3.87327e-15
ENSDARG00000087910	dact3a	101884530	3.3451	19.4772	1.39907	0.00364341	0.00925631
ENSDARG00000008010	zgc:194189	100004081	47.8603	117.794	1.20716	4.62571e-05	0.000161449
ENSDARG00000022045	map1ab	797545	5.33736	21.3115	1.28431	0.00617875	0.0149271
ENSDARG00000061566	slc7a3b	100003376	18.5598	65.8911	1.54642	8.13618e-06	3.14224e-05
ENSDARG00000061560	stim1b	100005700	12.3673	33.3426	1.07326	0.0079947	0.0187341
ENSDARG00000062056	elmod1	791199	1.18438	11.9923	1.14183	0.0149718	0.0327526
ENSDARG00000004105	tie1	30746	12.7449	36.3764	1.03188	0.0191333	0.0406992
ENSDARG00000103858	arf4a		8.94836	26.8305	1.16333	0.0061731	0.0149171
ENSDARG00000103851	tnrc6c2	100149391	293.751	878.685	1.55369	2.39875e-42	7.41714e-41
ENSDARG00000099265	slc7a5	797250	3.64228	64.1558	2.73113	3.51115e-09	1.96492e-08
ENSDARG00000099266	vasna	553185	116.449	402.361	1.71664	1.02686e-24	1.66807e-23
ENSDARG00000035958	tnni2b.1	550249	0.888283	11.8406	1.15086	0.0120494	0.0270312
ENSDARG00000035952	cdr2a	100148175	265.218	976.132	1.82206	2.34613e-41	7.04272e-40
ENSDARG00000100577	CU694481.1		35.4075	113.913	1.49198	1.36776e-07	6.58021e-07
ENSDARG00000100573	ckap2l	569937	238.618	544.836	1.14964	3.25817e-17	3.52749e-16
ENSDARG00000035132	rgs3b		63.5512	210.11	1.6443	1.38514e-13	1.12785e-12
ENSDARG00000074563	gpr37a	100537916	1.64236	16.6713	1.27025	0.00865528	0.0200737
ENSDARG00000098826	plcl2	100334276	12.3585	36.912	1.14776	0.00850824	0.0197891
ENSDARG00000043465	atp6v1b2	359840	150.284	346.151	1.16005	1.03498e-13	8.52318e-13
ENSDARG00000088541	tpbgl	100537897	1.18438	12.9744	1.25161	0.0088433	0.0204764
ENSDARG00000001015	znf384l	368610	22.4764	85.3069	1.63961	1.65027e-06	6.96684e-06
ENSDARG00000067591	puraa	415106	7.63338	55.8602	2.20158	4.70908e-08	2.37484e-07
ENSDARG00000096633	CR926130.1		2.1116	18.9068	1.30072	0.00778453	0.0182871
ENSDARG00000058597	nt5c3a	321720	370.542	802.488	1.10395	3.60704e-29	7.13449e-28
ENSDARG00000096988	CR589944.1		0.592189	16.0635	1.70341	0.000685197	0.00199436
ENSDARG00000059424	rnf215	101882431	23.6117	70.6248	1.29665	0.000326812	0.00100417
ENSDARG00000093005	si:dkey-33c12.11		30.9868	69.1058	1.00373	0.000962658	0.00273116
ENSDARG00000097589	zgc:174574	101882695	75.3321	156.754	1.00417	1.39528e-05	5.2125e-05
ENSDARG00000090679	si:ch211-79k12.2	568844	151.599	343.529	1.13223	5.50747e-12	3.94094e-11
ENSDARG00000087394	tshz3a	558522	342.707	865.751	1.32	3.42017e-37	8.89972e-36
ENSDARG00000057575	pnp4a	415192	52.2806	132.786	1.23515	5.20448e-07	2.3467e-06
ENSDARG00000021086	znf367	550421	113.736	415.306	1.79462	2.09376e-23	3.16934e-22
ENSDARG00000033840	fat3a	569256	69.13	220.82	1.53814	7.70466e-11	5.04572e-10
ENSDARG00000036912	edn1	58032	2.07266	20.4338	1.42889	0.00329261	0.00844411
ENSDARG00000102385	CR774179.4		9.62094	32.0438	1.34512	0.00118535	0.00330774
ENSDARG00000073843	myo9ab		383.515	896.758	1.19846	4.49245e-27	8.02481e-26
ENSDARG00000062929	FAM83G	101882918	143.56	439.365	1.52766	2.40642e-17	2.62277e-16
ENSDARG00000008287	fam114a1	560911	355.912	888.502	1.31862	1.31657e-27	2.40004e-26
ENSDARG00000077174	QSOX2	559603	17.609	55.3719	1.42569	9.66277e-05	0.000322455
ENSDARG00000034187	calm1b	368217	6.20202	19.6381	1.15426	0.0127764	0.0284987
ENSDARG00000034181	esr2b	317733	4.77645	41.0504	2.07992	4.50709e-06	1.79457e-05
ENSDARG00000075990	acap3a	322991	9.17171	29.2889	1.19273	0.00628125	0.0151447
ENSDARG00000030560	helz	406550	1120.05	2996.73	1.35086	5.34203e-11	3.53998e-10
ENSDARG00000074481	ulk1b	558848	102.341	256.735	1.24448	5.88388e-10	3.55543e-09
ENSDARG00000020718	SLC25A22	571044	3.05009	20.5494	1.09858	0.0226067	0.0473202
ENSDARG00000078733	cnnm2b	565702	28.8941	115.934	1.8286	6.58507e-11	4.33576e-10
ENSDARG00000013961	slc31a1	403028	391.339	975.861	1.28819	1.07928e-26	1.90182e-25
ENSDARG00000020926	creb3l3l	406853	285.625	940.425	1.71046	3.86294e-54	1.63397e-52
ENSDARG00000020924	myo1ca	567536	11.3961	60.5328	1.43893	0.00252018	0.00662133
ENSDARG00000061819	wscd2	561091	3.76522	29.3655	1.65639	0.000674155	0.00196485
ENSDARG00000041947	styk1	324714	0.938489	9.50307	1.08395	0.0233476	0.0487163
ENSDARG00000012763	arl13b	286784	54.9095	167.613	1.53228	6.81791e-12	4.84669e-11
ENSDARG00000028800	CYTH2	569358	177.144	397.872	1.12451	2.48216e-13	1.98228e-12
ENSDARG00000103361	tshz3b	565811	137.564	426.58	1.59594	5.63378e-27	1.00269e-25
ENSDARG00000100107	ubald2	553806	236.081	626.099	1.35446	3.16845e-19	3.87956e-18
ENSDARG00000003754	tspan2a	378854	86.1279	203.569	1.16317	5.10671e-08	2.56543e-07
ENSDARG00000003751	lats1	553164	343.116	1281.62	1.88604	1.03549e-68	6.44443e-67
ENSDARG00000005343	ccdc85al	447831	5.21261	79.7473	2.98715	2.03682e-12	1.51748e-11
ENSDARG00000005690	slc25a23a	561939	62.2893	141.655	1.10533	2.54411e-06	1.04623e-05
ENSDARG00000003900	si:dkeyp-111e5.4	561988	7.27472	25.1694	1.22807	0.00785366	0.0184356
ENSDARG00000055026	ptch2	30181	2.18434	40.4494	2.48624	5.19086e-07	2.3411e-06
ENSDARG00000098451	tmem56a	571836	20.682	67.2383	1.36058	0.000224744	0.000710672
ENSDARG00000042145	lhx8b		14.3559	111.952	2.43936	4.8558e-12	3.49639e-11
ENSDARG00000075263	ankrd1a	100151027	37.9495	91.0241	1.13854	0.000239503	0.000754045
ENSDARG00000089221	si:ch211-195o20.7	564006	0.938489	10.4382	1.09308	0.0202822	0.042891
ENSDARG00000089225	trove2	568429	165.23	687.636	2.03382	4.58834e-56	2.04249e-54
ENSDARG00000070162	stox2a	571741	2.59211	58.7131	3.09708	2.04745e-11	1.40489e-10
ENSDARG00000102199	SIKE1	449731	175.612	409.915	1.19341	2.25202e-18	2.62583e-17
ENSDARG00000069926	hsd3b1	553532	20.1727	277.878	3.47075	3.68472e-38	9.90466e-37
ENSDARG00000015536	sox6	567154	13.7259	53.576	1.26898	0.00599766	0.0145363
ENSDARG00000033172	nr2f5	30427	2.82673	17.6643	1.38091	0.00523039	0.0128528
ENSDARG00000033179	tmem243b	405855	275.582	667.284	1.26135	2.75736e-29	5.4928e-28
ENSDARG00000045277	rdh12l	494176	29.985	96.7161	1.5037	2.48744e-07	1.16096e-06
ENSDARG00000017821	gata5	30482	4.95726	65.5712	2.4099	2.49841e-07	1.16581e-06
ENSDARG00000090156	pttg1ipa	321786	1.87698	30.1382	2.00539	6.54781e-05	0.000224054
ENSDARG00000090153	cyldl	561108	164.681	336.48	1.00326	8.93765e-11	5.82198e-10
ENSDARG00000067605	napaa	567306	99.4912	220.42	1.0995	3.5942e-09	2.00737e-08
ENSDARG00000019613	ip6k2b	436662	167.586	573.033	1.73366	1.68916e-34	4.08029e-33
ENSDARG00000061600	tmem2	566851	374.773	1085.31	1.48174	2.03481e-23	3.0849e-22
ENSDARG00000056204	zgc:113436	503528	56.4525	129.763	1.11152	7.01092e-06	2.7325e-05
ENSDARG00000042826	egr2b	30190	13.1581	89.2848	2.31085	1.73649e-09	1.00785e-08
ENSDARG00000042825	RNF169	795748	110.079	347.653	1.61058	1.72146e-22	2.49931e-21
ENSDARG00000021177	cept1b	570720	68.9995	242.344	1.71334	2.50101e-15	2.352e-14
ENSDARG00000104118	antxr2a	557239	16.4079	58.6217	1.39163	0.000506721	0.00150629
ENSDARG00000071091	chrm3a	571679	4.63349	20.8014	1.24915	0.00981384	0.0224806
ENSDARG00000071543	si:dkey-42i9.7	558681	0	6.56836	1.08623	0.0042022	0.0105268
ENSDARG00000004307	lypd6	447932	10.0695	48.9698	1.79207	6.65889e-06	2.60412e-05
ENSDARG00000001879	nav2b	557290	80.9015	200.542	1.20517	1.21351e-07	5.86266e-07
ENSDARG00000031845	mboat2a	570695	13.3342	42.3369	1.31954	0.000825354	0.00236844
ENSDARG00000077653	rabl6b	100003036	463.601	1095.54	1.23385	2.69213e-38	7.27656e-37
ENSDARG00000039455	tspan15	100000710	148.458	346.253	1.19018	2.19766e-14	1.9389e-13
ENSDARG00000104945	sncb	393944	23.038	60.5543	1.20142	0.00106549	0.00299983
ENSDARG00000104949	slc27a1b	553512	2.81547	35.6158	1.81409	0.00023267	0.000733833
ENSDARG00000074307	rapgef5b	100073343	379.544	862.174	1.16873	4.06437e-33	9.3223e-32
ENSDARG00000074305	si:ch73-257c13.2	566826	6.90589	42.3372	2.0102	2.83903e-06	1.15971e-05
ENSDARG00000068417	FOXL2	100149117	8.21141	168.752	3.84389	5.43028e-28	1.00682e-26
ENSDARG00000045636	rbl2	100331892	3.35745	28.9388	1.80648	0.000194894	0.000622018
ENSDARG00000098171	zgc:162193	323315	70.0198	205.926	1.51291	9.37745e-13	7.18925e-12
ENSDARG00000045180	acta2	322509	44.3758	232.16	2.15577	1.28681e-16	1.32631e-15
ENSDARG00000044588	emp2	445506	6.7149	31.4854	1.40589	0.00252175	0.00662455
ENSDARG00000014098	pkd2	432387	12.8263	50.1252	1.25948	0.00654781	0.0157196
ENSDARG00000012553	rap1aa	415242	739.101	1575.15	1.07475	1.43778e-40	4.21878e-39
ENSDARG00000094881	si:ch211-197h24.8	100534935	0.703867	10.1646	1.27109	0.0094539	0.0217427
ENSDARG00000078095	cipcb	101883257	228.22	666.373	1.51449	9.09282e-29	1.75585e-27
ENSDARG00000094263	CU539058.1		1.77657	16.0231	1.27104	0.00836129	0.0194775
ENSDARG00000030367	metrn	494493	32.9307	213.406	2.54319	3.07147e-23	4.61713e-22
ENSDARG00000062154	dip2ca	563890	20.7737	92.6594	1.85098	8.26314e-09	4.488e-08
ENSDARG00000038123	myl9a	450006	15.385	98.1895	2.3464	1.27803e-12	9.69916e-12
ENSDARG00000096375	march7		5.83788	24.8232	1.23765	0.00965172	0.0221482
ENSDARG00000019130	plk2b	565576	9.93814	129.293	2.73351	5.40204e-11	3.57732e-10
ENSDARG00000055472	nubp1	503919	224.28	568.206	1.31638	1.93818e-23	2.94067e-22
ENSDARG00000102308	ttc39c	553591	300.828	994.727	1.68801	3.55719e-52	1.44221e-50
ENSDARG00000102300	ca9	566612	3.28471	122.598	1.01843	0.00147797	0.00405825
ENSDARG00000098215	BICD2		74.6071	214.815	1.4496	4.0037e-12	2.90856e-11
ENSDARG00000060148	sh3pxd2aa	562018	10.2521	46.05	1.65212	7.01466e-05	0.000238983
ENSDARG00000070538	hey1	58008	10.7864	85.1322	2.35994	1.51572e-09	8.84715e-09
ENSDARG00000071662	si:rp71-36a1.3	100034563	9.86683	31.9269	1.24925	0.00386189	0.00975053
ENSDARG00000059950	plxdc2	100000303	10.2066	129.946	2.88888	3.67885e-14	3.18247e-13
ENSDARG00000082716	AC024175.16		3.56079	44.1365	2.64069	5.09802e-09	2.81667e-08
ENSDARG00000001733	gulp1a	368404	33.6193	221.659	2.56338	2.2161e-26	3.85294e-25
ENSDARG00000098695	vclb		93.5507	404.215	1.95818	8.6578e-19	1.02977e-17
ENSDARG00000075759	samd4a	100149858	81.0859	292.146	1.73546	1.00535e-18	1.19215e-17
ENSDARG00000051816	aass	556229	264.546	568.02	1.07199	5.46989e-17	5.8157e-16
ENSDARG00000098324	CABZ01054394.2	101885937	22.9794	54.0691	1.04324	0.00370764	0.00939993
ENSDARG00000044954	slit1a	556123	9.62275	92.1792	2.72616	1.28179e-13	1.04675e-12
ENSDARG00000069185	celsr1a	368436	7.94948	187.932	3.6792	3.10458e-24	4.90856e-23
ENSDARG00000016774	plekho2	100334463	18.1208	42.996	1.05796	0.00379019	0.009589
ENSDARG00000016773	cishb	100136861	33.1784	88.7228	1.30679	1.0689e-05	4.05521e-05
ENSDARG00000058231	nt5c2b	557972	33.5483	176.183	2.23677	3.87494e-19	4.71508e-18
ENSDARG00000058232	fbrsl1		68.8096	319.52	2.07696	5.86162e-25	9.60166e-24
ENSDARG00000044044	rassf2b		2.38768	20.7156	1.67424	0.000632753	0.00185553
ENSDARG00000018593	parp16	405842	131.819	362.532	1.40028	1.51094e-15	1.44386e-14
ENSDARG00000057323	e2f8	565952	444.885	935.007	1.06254	1.34848e-29	2.71111e-28
ENSDARG00000011487	gnaq	570108	0.469245	10.7054	1.43059	0.00375448	0.00951006
ENSDARG00000011488	sirt2	322309	65.7152	203.207	1.50507	1.51826e-10	9.69285e-10
ENSDARG00000039647	slc6a1b	492490	0	42.7678	3.56037	1.25035e-09	7.34208e-09
ENSDARG00000043757	ptbp3	798982	93.9035	299.692	1.54873	3.6119e-12	2.64062e-11
ENSDARG00000033928	ndfip2	406656	74.1557	232.059	1.50534	4.89299e-10	2.98622e-09
ENSDARG00000063917	mt-nd4	140534	663.784	11709.2	4.10474	0	0
ENSDARG00000063916	mt-nd4l	140538	102.989	1951.58	4.19461	1.86665e-294	8.10625e-292
ENSDARG00000063912	mt-co3	140541	1431.62	21314.8	3.86276	0	0
ENSDARG00000063911	mt-atp6	140519	76.288	987.341	3.58566	9.07365e-85	7.61019e-83
ENSDARG00000063910	mt-atp8	140520	162.815	2659.84	3.96299	0	0
ENSDARG00000005853	slc25a6	566370	0	7.27688	1.14659	0.00281653	0.00732996
ENSDARG00000037978	clec19a	570145	82.4573	215.935	1.34234	1.73067e-12	1.2978e-11
ENSDARG00000088171	ciartb		1.99992	14.0145	1.31376	0.00869523	0.0201592
ENSDARG00000010531	scamp4	562881	213.999	462.072	1.09361	2.00616e-15	1.90405e-14
ENSDARG00000070702	s100v2	336965	9.99852	78.1363	2.40181	1.1197e-10	7.22866e-10
ENSDARG00000088828	paqr8	368254	22.4469	51.4458	1.02805	0.00286853	0.00745191
ENSDARG00000040838	dcun1d2a	192303	133.914	465.867	1.76191	1.46271e-30	3.06041e-29
ENSDARG00000031756	mef2aa	30564	21.8776	103.339	1.88444	1.02147e-08	5.49055e-08
ENSDARG00000045929	oaz2a	100002007	22.0828	84.5396	1.59163	1.09089e-05	4.13222e-05
ENSDARG00000077946	smarcc2	567476	25.1085	112.377	1.76803	8.41824e-07	3.69684e-06
ENSDARG00000075549	cdh5	445471	49.8085	131.222	1.31889	6.25634e-08	3.11098e-07
ENSDARG00000069600	zgc:109889	553542	87.2567	275.361	1.56674	7.02608e-16	6.85815e-15
ENSDARG00000069603	taok1a	100004576	26.3882	112.065	1.80684	2.21643e-09	1.26944e-08
ENSDARG00000019693	clcn5a	562336	255.844	629.437	1.27024	1.50343e-25	2.51757e-24
ENSDARG00000099840	lpar1	368461	122.589	363.843	1.50686	7.70915e-21	1.03399e-19
ENSDARG00000099849	ebf1a	565310	37.4274	152.012	1.7744	7.21785e-10	4.32938e-09
ENSDARG00000045863	asb15b	568579	0.469245	13.3315	1.70408	0.000980398	0.00277585
ENSDARG00000061682	bicc1a	568201	661.316	1659.59	1.3123	3.38823e-35	8.37076e-34
ENSDARG00000056753	dctn1b	100003026	0	5.93238	1.01714	0.00644832	0.0155055
ENSDARG00000012642	si:ch211-266d19.4	793549	61.931	336.474	2.31288	1.58053e-32	3.538e-31
ENSDARG00000071018	ptena	794088	765.821	1771.92	1.20804	1.42628e-48	5.26888e-47
ENSDARG00000018643	igf2a	30710	7.49042	28.6163	1.25562	0.00710488	0.0168663
ENSDARG00000076548	si:dkey-266m15.5		0.469245	16.9717	1.84368	0.00036698	0.00111828
ENSDARG00000076542	pogzb	561483	526.429	1184.08	1.15122	1.77755e-37	4.67523e-36
ENSDARG00000036164	cars	368284	668.69	1687.41	1.32105	1.53976e-51	6.09109e-50
ENSDARG00000100396	pip5k1aa	553629	35.8211	178.39	2.07829	7.59077e-14	6.35012e-13
ENSDARG00000104676	prkd2		28.3434	80.804	1.36929	9.48809e-06	3.62992e-05
ENSDARG00000029859	si:ch211-241d21.5		42.0166	96.4169	1.00851	0.00559024	0.0136385
ENSDARG00000001549	sp3a	558652	278.326	723.199	1.364	6.3907e-31	1.3634e-29
ENSDARG00000026086	zgc:162324	556322	0.592189	9.54184	1.18493	0.0102821	0.0234425
ENSDARG00000063895	mt-nd1	140531	382.97	6998.08	4.15004	0	0
ENSDARG00000063899	mt-nd2	140532	310.815	5531.7	4.07474	0	0
ENSDARG00000035452	camkk1a	541526	16.7647	143.134	1.20088	0.00803485	0.0188135
ENSDARG00000075034	raver2	797613	31.9347	113.414	1.63589	4.33303e-09	2.40352e-08
ENSDARG00000100805	si:ch1073-209e23.1		0	5.93238	1.01714	0.00644832	0.0155055
ENSDARG00000017121	mafba		105.832	463.755	2.0343	8.30579e-33	1.8764e-31
ENSDARG00000070025	dchs1a	100334632	96.0705	307.173	1.60349	9.85847e-17	1.02204e-15
ENSDARG00000079839	arrdc1b	570029	11.2964	35.1275	1.17229	0.00642687	0.0154634
ENSDARG00000074802	cflarb		1.17311	26.805	2.22769	1.88873e-05	6.94312e-05
ENSDARG00000074804	atxn7	100001490	131.862	376.731	1.44574	1.44082e-17	1.59347e-16
ENSDARG00000080018	kif16bb	567045	26.6294	59.6673	1.01738	0.00169309	0.00459342
ENSDARG00000016059	rab5b	405821	9.82718	84.8175	2.55728	1.34106e-12	1.01578e-11
ENSDARG00000074023	rbms1a	564994	27.9414	89.5502	1.40648	3.23184e-05	0.000115207
ENSDARG00000096045	si:ch73-263o4.4	100331498	27.0673	109.812	1.84977	2.63323e-11	1.78862e-10
ENSDARG00000096046	BX649307.1		0.469245	10.5335	1.24026	0.00721054	0.0170839
ENSDARG00000058658	si:dkey-178e17.3	100535682	17.6687	54.0276	1.31811	0.000937674	0.00266531
ENSDARG00000055389	si:dkey-67c22.2	792544	2046.17	4147.93	1.0074	1.04052e-30	2.19115e-29
ENSDARG00000020811	efemp2b	572703	28.5165	82.0887	1.37179	1.30561e-05	4.89245e-05
ENSDARG00000056125	myct1a	796556	0	15.8419	1.81349	3.77158e-05	0.000133208
ENSDARG00000069383	cnga4	568123	5.27589	22.4857	1.346	0.00401681	0.010109
ENSDARG00000013460	wfikkn2a	564992	4.98745	29.9411	1.53137	0.00140689	0.00387396
ENSDARG00000101629	MGAM		13.4582	67.9693	1.81896	2.42121e-06	9.98425e-06
ENSDARG00000042807	slc16a4	567144	4.98745	32.1806	1.61381	0.000736916	0.00213409
ENSDARG00000024874	dock4b	654774	78.1098	179.027	1.12808	1.42547e-07	6.8494e-07
ENSDARG00000031387	cers4a	259250	34.5476	92.0715	1.25824	1.43722e-05	5.35895e-05
ENSDARG00000005762	col14a1a	321298	14.807	62.0784	1.68353	4.52834e-06	1.80267e-05
ENSDARG00000070903	met	100150664	29.826	68.3529	1.00433	0.00198159	0.00530613
ENSDARG00000069105	fgfr4	100000160	10.0334	48.742	1.47984	0.00130405	0.0036101
ENSDARG00000006120	tbx2b	30253	3.51933	26.7944	1.27899	0.00854561	0.0198666
ENSDARG00000095082	si:ch211-194p6.12	564958	19.3754	46.7062	1.02217	0.0056064	0.0136745
ENSDARG00000014357	amh	493624	0.938489	87.8222	4.11002	1.59501e-13	1.29496e-12
ENSDARG00000090398	PDE1C	100536162	14.3021	56.1606	1.42832	0.000915581	0.00260593
ENSDARG00000077253	alkbh6	317736	109.558	236.443	1.05441	6.20259e-09	3.40098e-08
ENSDARG00000087804	tnfrsf11a	100333821	24.3334	61.7442	1.17315	0.000312319	0.000963737
ENSDARG00000012177	rab4b	445498	140.336	351.68	1.25956	3.69599e-13	2.91356e-12
ENSDARG00000079155	si:ch211-67f13.8		0	19.7415	2.4342	1.6557e-06	6.98675e-06
ENSDARG00000101508	nr6a1a	30506	49.7121	131.616	1.24007	1.89053e-05	6.94842e-05
ENSDARG00000018149	slc38a4	449771	30.563	460.049	3.56977	8.80661e-51	3.41777e-49
ENSDARG00000052139	notch3	58066	35.155	667.575	3.85903	1.07463e-53	4.47772e-52
ENSDARG00000052131	gli3	403042	30.5878	173.146	2.2249	2.0602e-15	1.95249e-14
ENSDARG00000056594	irx1b	114430	11.6747	36.4462	1.23351	0.00287481	0.00746519
ENSDARG00000055648	cpda	563008	795.601	1795.12	1.16322	4.77772e-58	2.29401e-56
ENSDARG00000061738	march2	555611	36.4718	104.945	1.26276	0.000220549	0.000698763
ENSDARG00000052695	nr2f1a	30418	1.18438	16.3305	1.58591	0.00147573	0.00405266
ENSDARG00000052690	arrdc3a	566685	71.1537	351.214	2.20139	8.73126e-32	1.91071e-30
ENSDARG00000073902	ptpn9b	562170	378.945	894.828	1.21256	1.21983e-27	2.22576e-26
ENSDARG00000098954	stard13b	100005208	12.2567	73.8699	1.83349	2.39733e-05	8.67085e-05
ENSDARG00000098952	gata4	30483	3.88817	52.5889	2.61748	3.68427e-09	2.05591e-08
ENSDARG00000079547	zbtb47b	100536838	18.5799	72.3128	1.64207	1.16415e-06	5.01759e-06
ENSDARG00000042249	FRMD4A	564713	7.70431	30.2538	1.40495	0.00144706	0.00398009
ENSDARG00000093864	wee1	327060	1661.5	3506.93	1.07259	2.64907e-69	1.66994e-67
ENSDARG00000025875	kctd2	751724	32.9525	115.787	1.52519	4.64468e-06	1.84559e-05
ENSDARG00000057403	CR847953.1		43.1791	146.646	1.60095	7.35241e-10	4.40874e-09
ENSDARG00000091836	casp7	553634	6.90769	28.7626	1.4269	0.0018556	0.00499822
ENSDARG00000011618	slc26a2	557046	43.6982	135.605	1.53727	1.82818e-10	1.15582e-09
ENSDARG00000025595	agmo	405819	130.184	362.957	1.45303	7.31597e-18	8.24713e-17
ENSDARG00000007795	cst3	791878	50.3924	154.753	1.50669	5.83181e-11	3.85278e-10
ENSDARG00000100889	galnt18a		163.315	341.935	1.02648	1.65597e-10	1.05307e-09
ENSDARG00000100881	CT583728.11		9.37686	97.9226	2.82687	1.77497e-14	1.57523e-13
ENSDARG00000036987	has2	260350	1.48047	141.832	4.69634	2.23167e-19	2.75846e-18
ENSDARG00000102015	CABZ01037298.1		29.1684	80.0985	1.3225	1.06472e-05	4.04327e-05
ENSDARG00000068280	GRB14	100334415	0	33.5347	3.06026	2.48637e-08	1.28678e-07
ENSDARG00000056627	cxcl14	58151	100.025	211.425	1.0188	5.2864e-07	2.38254e-06
ENSDARG00000060569	tmem229b	767735	7.13394	30.1396	1.30891	0.0049543	0.0122259
ENSDARG00000070621	FAM72B	541418	6.94952	32.3456	1.40452	0.00251275	0.00660535
ENSDARG00000063037	lipea	568368	14.1449	68.8014	1.59899	0.000259335	0.000811387
ENSDARG00000063031	rad54l2	558947	685.787	1404.41	1.01084	8.56952e-23	1.25442e-21
ENSDARG00000082084	AC024175.14		2.72452	24.7385	1.97515	4.50247e-05	0.000157345
ENSDARG00000003068	gorasp1a	492770	6.77637	40.9789	1.71321	0.000167706	0.000540098
ENSDARG00000104436	zgc:153426	767746	21.0159	58.3188	1.15209	0.00398775	0.0100397
ENSDARG00000104431	slc1a3a	323439	16.5694	138.67	2.77788	6.88508e-21	9.24095e-20
ENSDARG00000073741	RAP1GDS1	100334870	94.5209	203.846	1.04603	6.87751e-07	3.0636e-06
ENSDARG00000079324	ano9b	559809	327.422	694.641	1.05714	2.13154e-19	2.63971e-18
ENSDARG00000074535	lingo2a	566713	37.0702	138.024	1.74099	4.74512e-10	2.90232e-09
ENSDARG00000058302	sh3bgrl	394184	9.88685	108.4	2.91465	2.40172e-17	2.61911e-16
ENSDARG00000056656	tspan18a	437007	60.2799	287.432	2.1596	4.68271e-30	9.60226e-29
ENSDARG00000071113	xirp2a	559746	57.2699	207.383	1.73485	2.79765e-15	2.61963e-14
ENSDARG00000060766	CU929199.1	565130	2.81547	24.7401	1.35558	0.00544116	0.013323
ENSDARG00000076466	maml1	567335	395.184	915.303	1.19646	8.40572e-33	1.89463e-31
ENSDARG00000105323	si:ch1073-456m8.1	103911796	47.9571	142.168	1.4683	1.62468e-07	7.75136e-07
ENSDARG00000011545	arrb2b	394099	304.336	765.96	1.32732	1.01857e-34	2.48501e-33
ENSDARG00000086740	phyh	550521	3.35745	17.1436	1.26534	0.0100393	0.0229406
ENSDARG00000086744	znf1152		8.56897	33.7143	1.51534	0.000389969	0.0011817
ENSDARG00000104539	OLFML2A	100330530	15.9942	169.318	1.37756	0.00233902	0.00618191
ENSDARG00000102583	il4r.1	503594	94.0716	220.136	1.17047	4.34381e-10	2.66772e-09
ENSDARG00000102580	CU571310.1	100330257	26.2045	65.0548	1.12302	0.000631011	0.00185098
ENSDARG00000092638	ptprua	563584	5.89936	25.2674	1.18521	0.0146401	0.0320953
ENSDARG00000103980	ets2	326672	216.097	657.572	1.57563	6.24121e-41	1.8396e-39
ENSDARG00000036826	ankrd52a	553206	531.037	1156.56	1.09204	3.05257e-19	3.74472e-18
ENSDARG00000035552	agtr2	503772	2.61104	14.7806	1.25296	0.0106015	0.0241125
ENSDARG00000059367	mfap2	556677	3.12283	17.8372	1.34261	0.00645634	0.0155228
ENSDARG00000075942	FRMD5		16.5214	91.2614	1.93325	3.76465e-07	1.72575e-06
ENSDARG00000097842	znf1134	103908714	10.8584	31.6463	1.02926	0.0220252	0.0462218
ENSDARG00000078280	nkx3-1		3.41892	17.4159	1.26235	0.0102013	0.0232782
ENSDARG00000034409	pik3r3b	100000252	782.303	1609.57	1.02636	3.41569e-40	9.80167e-39
ENSDARG00000039269	arg2	322614	31.472	349.071	3.15686	1.98894e-37	5.21018e-36
ENSDARG00000078707	sema7a	324910	6.692	43.4591	1.9842	9.23469e-06	3.53852e-05
ENSDARG00000055530	sertad2b	368888	17.242	49.2921	1.30676	0.000293368	0.000909998
ENSDARG00000011208	COX5B	100002384	0	11.041	1.49384	0.000318646	0.0009814
ENSDARG00000070357	cx39.4	557275	8.18302	23.9657	1.12477	0.00993775	0.0227271
ENSDARG00000028857	sgsm1a	100270734	7.30709	45.1576	1.78208	6.83616e-05	0.000233308
ENSDARG00000057394	rab33a	751718	98.0999	220.777	1.11371	3.34252e-09	1.87646e-08
ENSDARG00000026985	lims1	554019	279.031	768.455	1.42747	1.19299e-26	2.1003e-25
ENSDARG00000026988	tbc1d22b	557377	7.49151	32.8153	1.31741	0.0050271	0.0123946
ENSDARG00000020133	jdp2b	436766	61.2242	1058.22	3.92211	5.27828e-119	6.74171e-117
ENSDARG00000091503	FADS6	100538024	0.703867	26.0817	2.37484	1.48229e-05	5.51539e-05
ENSDARG00000018266	mthfd1a	567587	35.2195	108.639	1.41729	2.45435e-06	1.01124e-05
ENSDARG00000018263	pdia2	394023	43.362	1260.04	1.23239	0.000465665	0.00139336
ENSDARG00000035339	ftr99	568523	119.764	280.634	1.12094	3.01056e-06	1.22516e-05
ENSDARG00000038524	pik3r1	557176	964.871	2248.19	1.20952	1.44869e-68	8.98739e-67
ENSDARG00000036588	mhc1zba	791453	46.4231	135.386	1.3935	8.62078e-08	4.22435e-07
ENSDARG00000086283	cnsta	569425	3.88817	23.5281	1.51299	0.00175169	0.00474056
ENSDARG00000037183	FAM46A	100330676	0	9.85983	1.34824	0.000713482	0.00207144
ENSDARG00000005397	trim3b	555391	171.542	587.232	1.74965	2.94424e-43	9.40137e-42
ENSDARG00000104700	acvr2ab		141.046	406.154	1.46616	8.0815e-20	1.02352e-18
ENSDARG00000074143	myo10l3	555290	20.9355	69.9764	1.40321	0.000142633	0.000464247
ENSDARG00000092625	si:dkey-10b15.8	560031	3.75396	26.4615	1.21106	0.0125315	0.0280003
ENSDARG00000070138	si:dkey-84o3.3		0	25.2807	2.79348	1.8178e-07	8.61173e-07
ENSDARG00000092191	CR318588.1		40.2625	103.927	1.19795	3.37987e-05	0.000120155
ENSDARG00000002609	rnf145a	565986	26.5774	65.9756	1.14558	0.000424527	0.00127809
ENSDARG00000002601	irx7	140746	3.41892	23.3334	1.55353	0.00148408	0.0040716
ENSDARG00000015566	dnmt3ab	553189	3.89943	34.749	1.89643	7.58075e-05	0.000257103
ENSDARG00000078125	rusc1	558727	11.9784	39.2872	1.36285	0.000523114	0.00155266
ENSDARG00000076339	cln5	569407	46.0746	181.946	1.87259	7.86012e-16	7.64572e-15
ENSDARG00000012340	ptpn11b	393426	0.938489	18.397	1.82133	0.000419912	0.00126498
ENSDARG00000079293	gdpd4b	571892	21.8835	60.6749	1.17972	0.00164297	0.00446673
ENSDARG00000018065	ntm	678534	43.883	104.146	1.11249	4.66014e-05	0.000162535
ENSDARG00000078916	chrdl2	563085	0	16.2728	2.1193	1.02067e-05	3.88808e-05
ENSDARG00000023174	fez1	406705	4.53056	27.3645	1.53528	0.0013607	0.00375206
ENSDARG00000052072	dnajb9a	574005	22.6863	61.3096	1.21291	0.00138174	0.00380847
ENSDARG00000054890	rgra	550575	0	8.34776	1.11038	0.00256756	0.00673492
ENSDARG00000056490	SSBP4	553590	49.9449	176.487	1.67671	5.4485e-12	3.90589e-11
ENSDARG00000052386	cldnd1b	554386	190.799	471.575	1.25399	3.74178e-16	3.73452e-15
ENSDARG00000006044	ust	557218	410.252	863.705	1.06109	2.86476e-20	3.71734e-19
ENSDARG00000056233	TMEM179B	402849	319.663	761.729	1.22111	6.87116e-26	1.16559e-24
ENSDARG00000021140	pabpc1b	393856	92.7588	230.777	1.22232	3.11632e-09	1.75451e-08
ENSDARG00000021147	nipal3	436907	268.31	857.137	1.65796	6.45467e-39	1.77408e-37
ENSDARG00000005023	fkbp9	445126	9.59147	39.9904	1.47943	0.000944179	0.00268146
ENSDARG00000104125	ttc6		0	22.2764	2.45005	1.11021e-06	4.7989e-06
ENSDARG00000103589	gata6	58076	29.7504	283.649	3.02401	1.85554e-37	4.87378e-36
ENSDARG00000063525	adpgk	557919	252.553	565.787	1.13218	6.22665e-20	7.94452e-19
ENSDARG00000087181	cbx7b	101882803	93.1149	257.584	1.40706	8.50742e-14	7.07455e-13
ENSDARG00000103635	CT583728.20		45.2573	128.782	1.38649	1.53033e-06	6.48712e-06
ENSDARG00000088985	SPSB2		2.43789	11.8164	1.15114	0.0187352	0.039948
ENSDARG00000087457	ecscr	550161	5.21442	24.8915	1.52926	0.000824374	0.00236597
ENSDARG00000018542	hapln4	559818	214.083	526.294	1.27752	9.63519e-16	9.31672e-15
ENSDARG00000071671	nudt22	450049	260.272	549.249	1.04872	9.43944e-17	9.79195e-16
ENSDARG00000004372	fmnl3		16.0616	46.6671	1.14804	0.00442129	0.0110261
ENSDARG00000004378	yrk	337571	12.1214	31.6546	1.01561	0.0151338	0.0330664
ENSDARG00000033413	si:dkey-183c16.7	556673	38.4819	288.879	2.65329	8.09589e-27	1.43566e-25
ENSDARG00000036426	zgc:103586	492517	53.2369	124.676	1.1567	1.4888e-06	6.32011e-06
ENSDARG00000098850	BX284638.1		13.7834	35.5675	1.12707	0.0035397	0.00902097
ENSDARG00000002020	rictorb	561835	582.087	1227.17	1.05502	5.92274e-29	1.15627e-27
ENSDARG00000032431	mpv17	394140	69.0533	169.093	1.22645	1.02331e-08	5.49833e-08
ENSDARG00000015887	b2ml	791742	66.2102	268.707	1.81936	3.63261e-12	2.65377e-11
ENSDARG00000095640	si:ch1073-15f19.2	100538290	0	13.1367	1.82438	5.69695e-05	0.000196522
ENSDARG00000091548	stard9	100149555	2.1116	21.5626	1.41797	0.00381344	0.00964189
ENSDARG00000042368	kif26aa	567643	29.2393	79.1418	1.31588	1.307e-05	4.89673e-05
ENSDARG00000093940	si:dkeyp-77c8.1		1.17311	14.3861	1.40762	0.00458713	0.0113961
ENSDARG00000006288	prdm5	432371	4.57202	45.3683	2.37741	1.06295e-07	5.15438e-07
ENSDARG00000079881	tcaim	559258	23.1283	86.4572	1.66595	2.41099e-07	1.1269e-06
ENSDARG00000059473	kank4	101884737	10.6624	39.6679	1.41583	0.00111631	0.00313208
ENSDARG00000040432	klf2b	117509	39.5612	91.9388	1.07633	0.000272952	0.000850728
ENSDARG00000061478	igf2bp1	558182	403.169	916.304	1.16019	3.24083e-23	4.86797e-22
ENSDARG00000090624	ADGRL3		36.765	112.043	1.39588	3.40596e-06	1.37576e-05
ENSDARG00000062103	ankrd24	565326	0	9.62368	1.30177	0.000908228	0.00258688
ENSDARG00000103905			36.6497	110.948	1.41846	3.72912e-07	1.71027e-06
ENSDARG00000099371	cygb1	246090	2.98933	15.6932	1.18693	0.0131368	0.0291891
ENSDARG00000094057	cyp2j20	797309	4.23447	25.396	1.46901	0.0024899	0.00655233
ENSDARG00000073814	pax1b	572108	77.189	261.517	1.66095	2.47575e-15	2.32937e-14
ENSDARG00000012671	inhbaa	30072	3.75467	80.2687	3.45817	5.52308e-15	5.05773e-14
ENSDARG00000062955	fam69aa	678606	365.648	942.109	1.34528	4.19193e-42	1.27998e-40
ENSDARG00000070995	inpp4ab	792527	1.2033	10.9039	1.16199	0.00862468	0.0200194
ENSDARG00000069435	cfap58	561732	3.06136	18.2294	1.1442	0.0196695	0.0417442
ENSDARG00000074471	vps39	567078	568.635	1179.02	1.03762	1.88528e-30	3.93613e-29
ENSDARG00000077782	acer2	100331179	0	24.5467	2.59596	4.65314e-07	2.11076e-06
ENSDARG00000077785	atf5b	567253	28.1117	112.691	1.78322	1.24973e-09	7.34059e-09
ENSDARG00000077878	si:dkey-192l18.9	100005961	0.703867	40.2237	3.02782	1.17641e-07	5.68906e-07
ENSDARG00000075437	shc1	323818	297.564	921.902	1.60231	8.6985e-50	3.3007e-48
ENSDARG00000075436	sytl2b	572466	0.469245	18.5325	2.0784	0.000123088	0.000404812
ENSDARG00000075435	akap11	558595	556.668	1255.28	1.1528	4.11218e-33	9.42088e-32
ENSDARG00000040214	scrt1b	541533	0	7.00591	1.13429	0.00314224	0.00809673
ENSDARG00000045364	trappc3	445207	193.291	481.044	1.28178	1.86111e-21	2.59414e-20
ENSDARG00000013997	ern1		229.832	587.277	1.29554	1.52141e-16	1.56372e-15
ENSDARG00000016742	rgs7bpb	337556	12.4364	34.3531	1.11164	0.00698202	0.0166252
ENSDARG00000099609	tpbga	373095	0.469245	35.2147	2.87652	8.14305e-07	3.58485e-06
ENSDARG00000005318	stam2	492497	512.604	1167.1	1.16944	2.27545e-37	5.95274e-36
ENSDARG00000101203	ZNF513	568955	41.6211	103.046	1.11088	0.000376711	0.00114579
ENSDARG00000101209	lamb1a	286830	85.4863	824.397	3.01268	2.9659e-35	7.35529e-34
ENSDARG00000027199	smad1	30628	7.38749	28.2744	1.29034	0.00429762	0.0107493
ENSDARG00000035610	zgc:113208	550591	166.799	354.635	1.06847	1.77288e-12	1.32805e-11
ENSDARG00000056525	bcar1	568309	28.6406	138.154	2.04624	2.07776e-13	1.66887e-12
ENSDARG00000063924	mt-cyb	140512	865.791	17569.7	4.32059	0	0
ENSDARG00000063922	mt-nd6	140536	198.041	3146.41	3.88619	2.51622e-205	6.07062e-203
ENSDARG00000063921	mt-nd5	140535	501.385	9143.51	4.15079	0	0
ENSDARG00000003061	cd276	791140	43.369	99.6694	1.11172	6.1966e-05	0.000212632
ENSDARG00000073999	tapt1a	558330	45.7461	136.243	1.44611	8.35633e-07	3.67047e-06
ENSDARG00000083118	AC024175.20		1.95918	27.9362	2.35692	2.67162e-06	1.09544e-05
ENSDARG00000068621	si:ch211-181d7.3	100536895	0.703867	10.8476	1.34443	0.00665544	0.0159407
ENSDARG00000068628	rab8b	100093706	83.0608	263.347	1.60099	2.80979e-16	2.83182e-15
ENSDARG00000059003	strip2	556392	77.3974	471.595	2.42533	2.78683e-29	5.54586e-28
ENSDARG00000030472	slc16a5a	565514	8.6108	64.2914	2.11741	5.45621e-07	2.45285e-06
ENSDARG00000095483	AL929457.2		49.5557	107.205	1.04683	5.64015e-05	0.000194735
ENSDARG00000058011	arxa	30657	0.469245	10.3431	1.42763	0.00398638	0.0100376
ENSDARG00000055271	nkd2b	794221	0.888283	12.3881	1.41359	0.00418041	0.0104787
ENSDARG00000071065	g6pd	570579	532.042	1397.71	1.37613	2.76099e-49	1.03165e-47
ENSDARG00000028048	rdh8a	280648	37.0477	81.7247	1.01956	0.00131698	0.00364179
ENSDARG00000103505	fbxl3a	378451	93.562	206.8	1.05817	2.6671e-06	1.09382e-05
ENSDARG00000053684	aldob	321664	65.3456	335.735	2.30914	6.3857e-32	1.4037e-30
ENSDARG00000105214	agtpbp1	554164	8.2947	80.0501	2.70749	1.39585e-13	1.1361e-12
ENSDARG00000076594	pcdh12	555419	3.77649	23.5176	1.42805	0.00347694	0.00888189
ENSDARG00000040535	CSGALNACT1	793671	10.5489	29.9233	1.09798	0.0144708	0.0317596
ENSDARG00000086847	irgq1	565312	1.80495	15.0128	1.25721	0.00549048	0.0134287
ENSDARG00000068918	map2k2b	100002225	66.5452	173.622	1.31855	9.87842e-10	5.8676e-09
ENSDARG00000101018	PTDSS2	100004136	1200.31	2522.81	1.06002	1.77605e-48	6.54861e-47
ENSDARG00000079131	si:dkeyp-118b1.2	559983	396.361	834.842	1.04614	4.26932e-18	4.87331e-17
ENSDARG00000016200	trib3	405805	804.364	1852.89	1.19393	8.58303e-59	4.19324e-57
ENSDARG00000070074	lrp8	557734	7.93713	33.4095	1.51169	0.000456467	0.00136772
ENSDARG00000008491	RDH13	407663	32.9849	75.3201	1.02883	0.000933433	0.00265403
ENSDARG00000008141	rbl1	795522	197.063	407.325	1.03531	2.99766e-13	2.37938e-12
ENSDARG00000002897	INPP1	555899	50.6841	117.032	1.12083	0.000211252	0.000671483
ENSDARG00000074863	si:dkey-112m2.1		26.8352	80.388	1.36733	0.000110609	0.000366235
ENSDARG00000020072	thbs4b	252850	12.966	46.6081	1.52188	0.000111034	0.000367455
ENSDARG00000053917	alg10	100331575	103.811	351.886	1.70106	4.46902e-21	6.0775e-20
ENSDARG00000078815	grk5l	567452	245.638	687.34	1.46067	3.31723e-35	8.21615e-34
ENSDARG00000002235	mmp14a	373882	26.5577	127.41	1.96742	1.11046e-10	7.17141e-10
ENSDARG00000058606	sik1	553465	32.1748	626.281	4.01925	3.48232e-79	2.58751e-77
ENSDARG00000073893	dnase2	100000399	196.226	456.776	1.20244	3.85982e-14	3.3346e-13
ENSDARG00000104041	CR382372.3		0.938489	9.37157	1.08599	0.023575	0.0491321
ENSDARG00000029524	impdh1b	338306	44.3285	418.532	2.93727	1.18705e-31	2.5861e-30
ENSDARG00000100973	arhgap24	100005116	168.153	377.148	1.13238	2.82883e-13	2.24805e-12
ENSDARG00000057125	pld1b	572492	32.9849	176.034	2.1838	4.66467e-16	4.62023e-15
ENSDARG00000062790	CU639469.1		4.48036	21.604	1.28501	0.00820985	0.0191727
ENSDARG00000018460	mbnl2	560384	25.98	94.9638	1.58941	8.14764e-06	3.14542e-05
ENSDARG00000060868	mbtd1	568340	696.447	1821.9	1.36042	9.93161e-40	2.82098e-38
ENSDARG00000031911	tns3.2		10.1517	59.635	2.06388	1.00885e-07	4.90544e-07
ENSDARG00000102558	pde6h	393758	29.893	96.1337	1.5536	1.11525e-07	5.40131e-07
ENSDARG00000094010	swt1	559432	259.12	886.228	1.73791	5.42471e-53	2.23649e-51
ENSDARG00000081218	5_8S_rRNA		32.7397	251.75	2.58274	8.75572e-16	8.49574e-15
ENSDARG00000015966	yaf2	692296	2.59211	32.6261	2.25404	3.03312e-06	1.23357e-05
ENSDARG00000001807	tnfrsf21	564874	5.70258	23.8034	1.42679	0.00180508	0.00487289
ENSDARG00000006110	chd	30161	5.6422	33.4369	1.40034	0.00407222	0.010234
ENSDARG00000042004	nfya	83915	273.678	581.096	1.0827	1.82917e-19	2.27535e-18
ENSDARG00000093480	pamr1	100330319	6.41881	30.82	1.27587	0.00827135	0.0192955
ENSDARG00000093156	si:ch73-21g5.7		0	9.83727	1.46442	0.000453601	0.00136017
ENSDARG00000017474	zgc:110699	325371	10.0174	29.2728	1.05357	0.0199493	0.0422555
ENSDARG00000014587	slc38a5b	436921	339.878	834.099	1.2622	1.2696e-28	2.43003e-27
ENSDARG00000016981	bcar3	570610	9.8992	71.4649	2.05949	1.15732e-06	4.99035e-06
ENSDARG00000061226	timp2a	359835	132.562	812.568	2.47953	4.09434e-39	1.13653e-37
ENSDARG00000027112	ephb4b	30691	350.142	717.458	1.03085	3.6789e-15	3.40564e-14
ENSDARG00000026248	slc1a7b	100463517	0.938489	10.8933	1.2369	0.0115087	0.0259674
ENSDARG00000005800	ampd3a	556578	2.48043	15.0906	1.26668	0.0107022	0.0243245
ENSDARG00000057610	cdkn2c	555797	0	15.151	1.98465	2.12899e-05	7.75916e-05
ENSDARG00000035879	fuca1.2	445165	121.722	338.149	1.42827	1.11779e-18	1.32067e-17
ENSDARG00000063634	hpse	563020	155.487	328.513	1.06559	1.50908e-10	9.64052e-10
ENSDARG00000039827	bbs5	393269	39.6066	111.485	1.25982	0.000184335	0.000590827
ENSDARG00000071406	enthd2	100148088	36.7065	84.8994	1.07515	0.000410233	0.0012383
ENSDARG00000069266	esrra	405891	290.876	587.654	1.00629	3.72761e-12	2.71911e-11
ENSDARG00000069269	wdr35	565515	164.987	389.641	1.18557	8.48618e-11	5.53898e-10
ENSDARG00000001912	drd4-rs	503566	3.76522	33.969	1.85902	0.000121831	0.000401013
ENSDARG00000001910	rorab	554722	42.9263	120.213	1.36079	6.78309e-08	3.36178e-07
ENSDARG00000094608	si:dkey-222h21.10	100331993	11.112	44.3339	1.48464	0.000296119	0.000917515
ENSDARG00000017254	kcnk1b	561206	37.5282	125.703	1.60849	2.35249e-09	1.34265e-08
ENSDARG00000099728	zgc:56622	326033	4.86631	19.9346	1.30246	0.00565686	0.0137873
ENSDARG00000099722	zgc:153993	767645	111.334	242.735	1.09574	7.98343e-09	4.34211e-08
ENSDARG00000025826	gna12a	503589	32.5677	173.641	2.1758	3.95877e-16	3.94303e-15
ENSDARG00000025797	abhd2a	393888	90.1346	277.521	1.45915	3.42396e-08	1.74977e-07
ENSDARG00000063347	TRPM4	102659286	4.82666	19.7481	1.10359	0.0237327	0.0494123
ENSDARG00000005210	coro2a	323538	166.768	539.551	1.6538	5.34047e-34	1.26655e-32
ENSDARG00000003680	runx1t1	767809	108.52	256.056	1.19446	1.41454e-11	9.83735e-11
ENSDARG00000103830	ddr2l	565333	37.0906	226.112	2.35691	1.06251e-20	1.40675e-19
ENSDARG00000080337	AC024175.4		2696.88	116806	3.73483	4.09241e-18	4.68231e-17
ENSDARG00000003307	stx16	562857	300.976	1049.09	1.74901	6.14732e-41	1.81467e-39
ENSDARG00000008414	exoc3l2a	553301	2.61104	35.267	2.31669	2.28057e-06	9.43814e-06
ENSDARG00000008413	atp11a	562925	9.05057	49.8717	1.90937	1.38278e-06	5.89236e-06
ENSDARG00000070013	dmrt2b	558970	19.3063	110.823	2.20338	3.17056e-13	2.51152e-12
ENSDARG00000060551	rps6ka5	565173	0	11.6432	1.61986	0.000170409	0.000548527
ENSDARG00000068709	fam174b	798908	199.307	433.057	1.10642	1.96267e-15	1.86368e-14
ENSDARG00000076650	PDE9A	564389	3.03008	27.4291	2.10153	1.08088e-05	4.09748e-05
ENSDARG00000015065	c4	566261	79.1682	186.609	1.14485	1.9487e-07	9.20212e-07
ENSDARG00000040920	si:dkey-49n23.1	558742	19.1815	87.7605	1.87818	5.89136e-09	3.23578e-08
ENSDARG00000073771	tbc1d12b	100332088	13.1846	44.1298	1.31504	0.00116821	0.00326459
ENSDARG00000014891	robo2	60309	9.86612	99.3848	2.64892	4.63053e-12	3.34528e-11
ENSDARG00000059836	ddit3	561924	19.5514	133.195	2.33754	6.05384e-13	4.70769e-12
ENSDARG00000021805	aes	393395	45.5184	130.199	1.36353	3.90096e-07	1.78405e-06
ENSDARG00000059483	tead1b	100006454	10.1735	29.9273	1.09523	0.0119948	0.0269336
ENSDARG00000036102	ctdsp2	321465	22.5491	81.706	1.59171	2.26899e-06	9.39221e-06
ENSDARG00000096961	si:dkeyp-47f9.4		57.5234	204.339	1.70073	4.53891e-13	3.55937e-12
ENSDARG00000102191	CPNE8		0	13.2361	1.79996	6.2355e-05	0.000213854
ENSDARG00000090526	zgc:158404	557029	1.90717	26.6738	2.09061	3.15719e-05	0.000112711
ENSDARG00000052766	EVI5L		29.1287	79.6092	1.25714	0.000132664	0.000433966
ENSDARG00000060716	prkx	561941	6.03942	31.0332	1.63886	0.000259932	0.000812866
ENSDARG00000076496	frmd4bb		22.2723	133.624	2.17549	8.27512e-11	5.40844e-10
ENSDARG00000017007	nr4a2a	100008101	1.29606	11.9264	1.19264	0.0140858	0.0310331
ENSDARG00000086778	pdgfba	798657	8.20303	76.1923	2.4522	1.03113e-09	6.11172e-09
ENSDARG00000087793	si:dkey-54n8.2	100002736	110.093	327.109	1.52316	6.24184e-18	7.07529e-17
ENSDARG00000101112	FO704777.1	100535468	21.7336	55.145	1.15811	0.000799512	0.00230104
ENSDARG00000078392	chpfa	100331155	44.0474	226.406	2.21382	1.04909e-23	1.62194e-22
ENSDARG00000042732	tmem189	450031	323.789	1050.43	1.68402	5.20999e-65	2.94259e-63
ENSDARG00000069150	rit1	793942	9.88794	71.7752	1.93692	1.5815e-05	5.86222e-05
ENSDARG00000075126	si:dkey-84j12.1	563965	15.1315	54.6017	1.56517	1.08087e-05	4.09748e-05
ENSDARG00000008592	mtmr8	393365	592.445	1404.97	1.232	1.37127e-51	5.43558e-50
ENSDARG00000003113	ada	436919	6.9579	22.6374	1.18212	0.0099049	0.0226626
ENSDARG00000017748	arhgap29b	378998	14.0333	139.19	2.58735	1.99867e-11	1.37238e-10
ENSDARG00000093406	zgc:111986	553664	537.676	1175.1	1.11285	3.08467e-28	5.80738e-27
ENSDARG00000093405	casp6	552927	42.2065	147.399	1.68899	1.1908e-11	8.33179e-11
ENSDARG00000058448	zrsr2	100005490	158.754	326.818	1.0108	7.07937e-06	2.75611e-05
ENSDARG00000086980	mbd6	561863	70.9114	247.276	1.67299	1.002e-12	7.66684e-12
ENSDARG00000097897	sgip1a	566542	56.6114	148.435	1.25416	6.46164e-07	2.88606e-06
ENSDARG00000074750	qser1	100330496	137.117	466.997	1.71348	5.95429e-31	1.27168e-29
ENSDARG00000074756	tfb2m	569468	253.331	579.353	1.18265	3.36687e-23	5.04953e-22
ENSDARG00000020242	fermt2	553051	179.782	542.215	1.50994	6.18544e-16	6.08333e-15
ENSDARG00000045557	socs2	562062	6.23439	111.436	3.12628	1.47226e-14	1.31795e-13
ENSDARG00000099038	kcng1		0.469245	13.9419	1.72628	0.000829904	0.00237975
ENSDARG00000058162	pcyt1ba	100001552	1.64236	16.5974	1.27355	0.00856711	0.0199071
ENSDARG00000097137	CR753876.1		19.3554	120.134	2.38739	4.04734e-16	4.02714e-15
ENSDARG00000067741	itpkcb		501.754	1171.54	1.21364	2.77249e-48	1.02034e-46
ENSDARG00000057927	rps6ka3b	100009657	166.642	518.898	1.58818	1.56728e-27	2.85175e-26
ENSDARG00000056346	acap1	561771	110.935	279.658	1.28977	7.17251e-15	6.51931e-14
ENSDARG00000006356	slc18a3a	559347	3.76413	21.6282	1.61428	0.000728537	0.00211201
ENSDARG00000023498	gmppab	393469	88.823	282.904	1.62304	3.37398e-19	4.12605e-18
ENSDARG00000070425	dll4	563920	28.0018	70.3857	1.17101	0.00114779	0.0032135
ENSDARG00000070428	si:dkey-239n17.4	100151181	6.17292	39.2524	1.57867	0.00097003	0.00275059
ENSDARG00000103435	sorbs1		10.2455	43.5853	1.19757	0.0127491	0.0284409
ENSDARG00000004246	slit2	80353	56.9017	150.99	1.31523	3.98756e-08	2.02455e-07
ENSDARG00000100166	si:dkeyp-9d4.3	100148061	82.426	356.389	1.98765	1.89164e-20	2.48765e-19
ENSDARG00000018259	atp1a3a	64610	39.5605	149.79	1.68664	2.3617e-08	1.22452e-07
ENSDARG00000018257	ncoa1	563288	45.2536	184.854	1.84225	8.44685e-13	6.49875e-12
ENSDARG00000036558	col18a1	564123	225.257	1079.36	2.19168	8.19197e-50	3.11454e-48
ENSDARG00000076135	mmrn2a	100148368	6.11145	29.5357	1.2605	0.00960505	0.022054
ENSDARG00000031782	aim1a	556848	53.6555	361.522	2.50548	8.8643e-20	1.11975e-18
ENSDARG00000086256	si:ch211-236p5.2	561457	0	12.1546	1.77792	8.20122e-05	0.000276706
ENSDARG00000017569	reep3a	641577	10.3336	39.2091	1.25036	0.00683994	0.0163326
ENSDARG00000042296	dlx5a	30569	0	7.95058	1.27242	0.00145927	0.00401082
ENSDARG00000008388	mmp14b	566945	44.0259	210.902	2.04679	2.24038e-15	2.11505e-14
ENSDARG00000008030	myl9b	406493	44.7316	120.084	1.2542	7.98649e-06	3.08687e-05
ENSDARG00000008034	skib	30113	68.2993	215.933	1.58724	7.61408e-16	7.41746e-15
ENSDARG00000015554	zic2a	58077	3.5306	27.1323	1.72749	0.000348505	0.0010663
ENSDARG00000044191	gxylt2	567541	129.985	377.105	1.44354	8.93234e-14	7.41214e-13
ENSDARG00000042904	foxo3b	30296	27.2398	154.807	2.22097	5.27811e-14	4.49824e-13
ENSDARG00000046107	caskin1	563678	96.9701	328.15	1.67053	9.5794e-13	7.33833e-12
ENSDARG00000079730	FUZ	797090	1.2033	20.1668	1.80102	0.000227698	0.00071943
ENSDARG00000053868	etv2	555766	31.1399	73.0694	1.08484	0.000383792	0.00116388
ENSDARG00000053864	elmsan1b	560411	467.358	1271.09	1.4029	7.83787e-28	1.4409e-26
ENSDARG00000018010	crtap	406626	2.36876	27.4184	1.62051	0.000875273	0.00249775
ENSDARG00000041348	cyp19a1a	30390	38.8897	640.393	3.7299	1.39485e-55	6.12543e-54
ENSDARG00000101367	si:ch73-193i22.1		1.77657	33.1829	2.21972	1.02425e-05	3.90098e-05
ENSDARG00000101366	gpr1	100004124	6.1529	20.2446	1.12411	0.0143148	0.0314704
ENSDARG00000099203	atp1b2a	64269	2.41896	19.6958	1.65311	0.000844431	0.00241856
ENSDARG00000056998	kirrelb	100170816	47.3652	136.351	1.36783	1.4974e-07	7.17737e-07
ENSDARG00000007727	rgl2	65227	0.938489	34.3237	2.67791	7.19038e-07	3.18699e-06
ENSDARG00000102048	slc25a43	796731	58.8777	227.273	1.88218	6.70778e-17	7.05508e-16
ENSDARG00000003380	PAOX	562105	8.16229	83.5602	2.71408	3.26109e-13	2.58113e-12
ENSDARG00000057714	cmah	431739	33.2704	431.761	3.52149	1.99838e-68	1.23584e-66
ENSDARG00000036376	cldn7a	436612	8.34671	106.615	3.07953	1.10999e-18	1.31304e-17
ENSDARG00000042856	itpka	368717	23.0999	141.266	2.34155	2.41555e-17	2.63125e-16
ENSDARG00000102953	ints4	564681	462.358	1095.12	1.21495	1.25877e-29	2.53336e-28
ENSDARG00000071384	slc7a11	100151597	10.1338	265.675	2.61116	1.81261e-08	9.50927e-08
ENSDARG00000037421	egr1	30498	157.975	1328.84	2.99068	1.69831e-135	2.65506e-133
ENSDARG00000063068	syne1b		22.9958	83.0318	1.61539	4.27694e-07	1.94916e-06
ENSDARG00000086866	gfpt1		111.28	587.919	2.3005	2.81631e-46	9.77553e-45
ENSDARG00000100555	aqp11	553476	1.53068	19.5858	1.84455	0.000293092	0.000909289
ENSDARG00000062338	zeb2a	100003889	21.276	174.674	2.63645	1.11707e-18	1.32062e-17
ENSDARG00000006849	asic2	407669	51.1337	109.158	1.04305	6.66382e-05	0.000227824
ENSDARG00000074546	si:ch211-213a13.11		5.66473	34.7917	1.69358	0.000243531	0.000765249
ENSDARG00000044874	zgc:92107	492329	281.476	841.544	1.57027	5.171e-36	1.31407e-34
ENSDARG00000045695	myca	30686	25.7488	102.826	1.7746	1.33466e-08	7.08746e-08
ENSDARG00000079636	fam177a1	100126028	75.298	245.706	1.62489	1.46379e-11	1.01618e-10
ENSDARG00000003293	sox9a	60641	4.28358	32.688	1.77312	0.000212691	0.000675838
ENSDARG00000044253	paqr3b	560764	27.2132	124.977	1.90113	7.21444e-10	4.32867e-09
ENSDARG00000044254	anxa3b	492336	64.2797	221.747	1.59795	7.98612e-09	4.34237e-08
ENSDARG00000099441	cbx4	573110	36.8243	123.695	1.31925	0.00126073	0.00350193
ENSDARG00000096614	si:dkey-182i3.10	108179186	189.425	399.843	1.03349	1.3926e-11	9.68825e-11
ENSDARG00000017673	nova2	553201	3.1843	16.9959	1.28322	0.00920912	0.0212498
ENSDARG00000017676	mmp2	337179	73.1659	498.403	2.61032	3.75393e-36	9.56445e-35
ENSDARG00000099995	apbb2b	564990	4.93833	28.5281	1.40362	0.00399962	0.0100683
ENSDARG00000099999	tcf3b	664768	331.489	1006	1.57026	1.04116e-54	4.47174e-53
ENSDARG00000022176	IGLON5	550472	126.114	464.14	1.73557	9.05239e-14	7.49584e-13
ENSDARG00000058319	cep76	564926	236.195	480.872	1.02052	1.63156e-14	1.45389e-13
ENSDARG00000100575	kdm2bb		22.1784	77.7099	1.21008	0.00773245	0.018186
ENSDARG00000076414	espn	567061	11.0399	33.4393	1.25762	0.00189192	0.00508617
ENSDARG00000063268	SLC35G1	100001920	3.29598	35.6265	2.09602	1.17498e-05	4.43442e-05
ENSDARG00000003961	parp3	335495	68.0712	240.183	1.74899	5.6181e-17	5.96031e-16
ENSDARG00000031372	efna2a	30218	30.8362	118.484	1.74753	5.78158e-10	3.50228e-09
ENSDARG00000028943	mtss1la	560413	12.5885	72.6699	2.14807	2.32312e-08	1.2058e-07
ENSDARG00000080151	AC024175.2		4.39707	36.0719	2.2204	6.9037e-07	3.07177e-06
ENSDARG00000073824	RASGRF1	568885	1.53068	12.4295	1.26904	0.0107984	0.0245175
ENSDARG00000062904	idua	567720	16.0594	43.895	1.19059	0.00214666	0.00571682
ENSDARG00000088052	CR759791.1	100535930	158.442	328.354	1.02649	9.34014e-11	6.07606e-10
ENSDARG00000103106	trappc9		66.1287	157.534	1.17939	2.5185e-06	1.03636e-05
ENSDARG00000053358	basp1	569631	26.8204	304.75	3.36288	4.05982e-46	1.39924e-44
ENSDARG00000100456	ptk2aa		10.2178	39.6185	1.20128	0.0108986	0.0247191
ENSDARG00000097819	znf576.1		670.259	1796.41	1.40003	2.87291e-42	8.84132e-41
ENSDARG00000077115	si:ch73-44m9.1	101883526	67.6212	155.498	1.08468	1.51283e-05	5.62046e-05
ENSDARG00000069469	khdrbs2	768147	1.18438	11.3481	1.05702	0.0218753	0.0459615
ENSDARG00000079182	NPAS3		20.4179	80.0209	1.64108	1.6922e-06	7.13001e-06
ENSDARG00000077804	hgsnat	100329505	139.828	296.097	1.04554	5.64034e-09	3.10314e-08
ENSDARG00000008890	ctns	553594	16.4522	53.924	1.10843	0.0164968	0.0356773
ENSDARG00000092493	si:dkeyp-44a8.2		153.341	340.014	1.11549	1.11507e-08	5.9684e-08
ENSDARG00000036175	pcdh1b	572016	19.0284	108.925	2.09944	8.40718e-10	5.01658e-09
ENSDARG00000019060	snx12	394098	776.18	2322.74	1.57405	2.73455e-94	2.55687e-92
ENSDARG00000096809	si:ch211-168b3.2		0	9.50042	1.4603	0.000496246	0.0014774
ENSDARG00000096803	CU660013.4		3.75396	42.5664	1.74763	0.000346372	0.00105994
ENSDARG00000025032	nr3c1	553740	325.456	884.595	1.39569	1.50852e-25	2.52392e-24
ENSDARG00000090400	CR388363.1		0	10.6571	1.52803	0.000301259	0.000932108
ENSDARG00000061121	adgrl3.1	560631	44.7484	170.51	1.81396	5.04122e-14	4.30575e-13
ENSDARG00000027469	hsd17b1	402842	24.1027	401.513	3.62213	4.66261e-41	1.38265e-39
ENSDARG00000011973	slc35d1a	445400	250.549	681.661	1.42035	2.81653e-25	4.67635e-24
ENSDARG00000063182	rc3h1b	558213	569.424	1728.56	1.56696	2.52729e-46	8.80363e-45
ENSDARG00000105187	gcshb	436852	5.66473	29.9985	1.46764	0.00193527	0.00519135
ENSDARG00000105185	snx7	431776	562.051	1228.78	1.12019	8.17447e-37	2.11303e-35
ENSDARG00000005368	mcamb	338313	6.12271	53.4756	2.13114	1.88766e-06	7.89567e-06
ENSDARG00000074111	bcdin3d		35.693	107.577	1.43069	2.26586e-07	1.06211e-06
ENSDARG00000055009	col4a1	554269	95.3371	441.182	2.00288	1.77135e-14	1.57273e-13
ENSDARG00000007219	actn1	560400	31.2101	76.9235	1.12918	0.000293828	0.000910991
ENSDARG00000075249	fam171a2a	556398	9.70423	61.3162	2.08564	1.05893e-07	5.13619e-07
ENSDARG00000035629	parvab	567123	7.54171	45.142	1.65447	0.000362917	0.00110705
ENSDARG00000098385	CT583728.2		6.59087	65.8441	2.63286	9.97674e-11	6.46866e-10
ENSDARG00000070145	magi1a	100319849	132.872	289.372	1.06157	8.67018e-09	4.69863e-08
ENSDARG00000037916	cdk5r1a	568402	0	7.29574	1.18755	0.00238117	0.00628483
ENSDARG00000044098	egr2a	368241	3.96856	24.022	1.68831	0.000337275	0.00103437
ENSDARG00000069940	ppap2d	559124	13.5302	59.8161	1.39616	0.00240399	0.00633993
ENSDARG00000002656	stxbp5a	556789	7.5701	80.9465	2.69731	4.84916e-12	3.49289e-11
ENSDARG00000010083	rbfox3a	100538330	57.7402	253.162	1.97924	5.50181e-19	6.6164e-18
ENSDARG00000042988	slc24a2	751686	0	6.93337	1.14085	0.00309558	0.00798703
ENSDARG00000042980	cyp2p7	100034406	8.55294	30.22	1.09487	0.0215598	0.0453717
ENSDARG00000079229	znf414	562459	55.9763	146.293	1.28869	4.72593e-07	2.14179e-06
ENSDARG00000016132	keap1a	321837	91.9306	243.068	1.34616	7.28967e-13	5.63731e-12
ENSDARG00000045989	arf4a	445196	70.0751	252.179	1.74957	2.09877e-19	2.60242e-18
ENSDARG00000094504	plekha1b	100537419	17.3151	59.4564	1.40819	0.000165205	0.000532833
ENSDARG00000099175	hmgb1a	321622	571.439	1318.61	1.19966	3.76931e-47	1.32482e-45
ENSDARG00000056915	si:ch211-237l4.6	446130	0.938489	38.8297	2.7988	2.39119e-07	1.11871e-06
ENSDARG00000055791	SLC3A2	790938	6.41881	173.475	3.83625	2.55984e-26	4.42693e-25
ENSDARG00000056267	dixdc1b	794716	503.555	1091.42	1.11241	1.93294e-34	4.6634e-33
ENSDARG00000097761	BX005234.1		0	8.4819	1.32977	0.00104063	0.00293661
ENSDARG00000097760	si:dkey-7i4.8		37.6493	87.8862	1.106	0.000174306	0.000560152
ENSDARG00000079420	dpp4	100301982	218.324	493.617	1.15432	3.6119e-19	4.40598e-18
ENSDARG00000007824	camta1b		61.4145	183.593	1.4452	8.64208e-10	5.15203e-09
ENSDARG00000007823	atf3	393939	211.654	915.266	2.07444	5.19786e-67	3.09685e-65
ENSDARG00000104172	diabloa	393317	301.518	626.381	1.04172	1.74346e-13	1.41021e-12
ENSDARG00000020645	slc7a3a	492363	197.907	791.199	1.96158	3.93286e-52	1.58793e-50
ENSDARG00000063572	perp	494479	67.3902	179.894	1.34645	3.65584e-11	2.45254e-10
ENSDARG00000063578	DGKI	100331649	7.35621	46.3075	2.02011	1.33149e-06	5.68616e-06
ENSDARG00000105223	pmp22a	334817	25.9528	68.3559	1.2517	0.000219905	0.000696948
ENSDARG00000018516	stk38b	100332206	2.36876	20.6941	1.33831	0.00562391	0.0137138
ENSDARG00000102799	znf1114		0	8.82805	1.33119	0.0009589	0.0027209
ENSDARG00000081369	AC024175.9		1.65362	11.1549	1.19816	0.0160013	0.0347364
ENSDARG00000031240	kidins220a	570732	136.656	550.325	1.88272	5.17383e-19	6.23732e-18
ENSDARG00000074326	mcm8	100333576	361.351	823.156	1.18119	1.44348e-25	2.42134e-24
ENSDARG00000074321	tead3a	386763	4.63169	26.1488	1.57518	0.000940351	0.00267137
ENSDARG00000063580	si:ch1073-219n12.1	571989	226.647	591.477	1.34593	1.88119e-22	2.72515e-21
ENSDARG00000006757	klhl41b	321064	1.53068	149.703	4.69354	6.72631e-21	9.03405e-20
ENSDARG00000080016	si:cabz01032454.3	100534979	48.6802	126.009	1.23346	1.71473e-06	7.22027e-06
ENSDARG00000042641	cyp51	414331	4.88813	22.7461	1.23385	0.0111733	0.0252862
ENSDARG00000042646	zgc:77784		126.255	457.542	1.73842	1.67002e-16	1.70956e-15
ENSDARG00000092045	si:dkey-225k4.1	108181549	26.0219	60.8481	1.00769	0.00587794	0.0142709
ENSDARG00000078640	fam117aa	564664	452.54	1069.83	1.21515	1.37489e-23	2.11393e-22
ENSDARG00000061421	BRSK2	100334759	24.5567	61.0386	1.14699	0.000453807	0.00136017
ENSDARG00000009727	twf2b	553677	0	6.90389	1.15195	0.00300217	0.00776037
ENSDARG00000058538	alcamb	323919	0.703867	25.5225	2.29394	2.38998e-05	8.64909e-05
ENSDARG00000061398	epb41l4b	100332627	112.939	251.401	1.12809	4.78095e-10	2.92149e-09
ENSDARG00000075802	GRIN3A	564832	2.99988	32.7175	2.03229	2.85727e-05	0.000102566
ENSDARG00000095556	CR318588.4		352.224	1205.58	1.72571	8.50892e-43	2.66477e-41
ENSDARG00000061985	rbm47	562991	34.1504	151.587	1.92191	3.01233e-12	2.21972e-11
ENSDARG00000020876	pdk2a	794083	71.4385	263.678	1.78912	6.75164e-20	8.59548e-19
ENSDARG00000026845	rhoaa	406411	183.679	440.948	1.24044	2.69419e-19	3.31549e-18
ENSDARG00000102858	sc:d189	100002334	0.469245	24.4314	2.48543	1.18969e-05	4.48734e-05
ENSDARG00000100981	CCDC39		8.96071	36.8169	1.29759	0.00514811	0.0126658
ENSDARG00000100985	zbtb7c	100537080	0	39.9391	3.47063	2.32897e-09	1.32962e-08
ENSDARG00000103720	zgc:162730		228.558	1972.85	3.03599	7.05545e-152	1.23105e-149
ENSDARG00000060830	fam83hb	565918	62.2337	294.189	2.11394	2.90115e-21	3.98975e-20
ENSDARG00000060835	tecpr2	569212	49.2305	104.463	1.00177	5.72322e-05	0.000197254
ENSDARG00000060838	trim35-33	100002502	6.88696	21.2377	1.15391	0.0101416	0.0231581
ENSDARG00000062479	vcam1b	561971	23.6011	56.2415	1.02454	0.00464376	0.0115251
ENSDARG00000101762	fah		9.9796	31.5592	1.16498	0.00694105	0.0165457
ENSDARG00000105077	cecr5	100137610	0.888283	9.16357	1.07956	0.0212095	0.0446682
ENSDARG00000038668	gbp1	436615	91.4126	194.855	1.0036	1.18385e-05	4.46685e-05
ENSDARG00000030097	sdcbp	407719	0	15.2758	1.60477	9.88479e-05	0.000329527
ENSDARG00000030095	ccdc78	100150366	0.469245	8.03373	1.16243	0.0137728	0.0304225
ENSDARG00000059972	raly	402903	15.6225	68.7342	1.76921	3.35115e-07	1.54271e-06
ENSDARG00000077737	spsb3a	796171	3.83796	49.1393	2.40088	2.60465e-07	1.21249e-06
ENSDARG00000074287	sptlc2b	557286	299.044	837.881	1.45401	1.21471e-36	3.12752e-35
ENSDARG00000045003	vsg1	570276	19.7413	91.3432	2.00694	1.10738e-10	7.15384e-10
ENSDARG00000045006	ptprga	561197	9.52162	60.2884	2.06412	1.46937e-07	7.0482e-07
ENSDARG00000011122	pptc7a	492506	21.0497	58.6007	1.23908	0.000382266	0.0011598
ENSDARG00000099651	bin3		182.282	387.654	1.0371	4.38556e-11	2.93e-10
ENSDARG00000096887	CR381618.1		14.58	171.26	3.18809	1.48865e-28	2.82989e-27
ENSDARG00000055854	nr4a3	548604	65.275	237.306	1.7222	1.72234e-14	1.5313e-13
ENSDARG00000078267	si:dkey-181m9.8	567642	41.9474	165.306	1.75773	1.50294e-10	9.60447e-10
ENSDARG00000026736	il11ra	334010	12.1214	79.1495	2.20812	8.36057e-10	4.9903e-09
ENSDARG00000037178	zic2b	570746	10.0695	27.504	1.03315	0.0178961	0.0383471
ENSDARG00000099510	cnn3a	326931	341.973	1278.45	1.86214	2.08071e-64	1.15188e-62
ENSDARG00000026294	erbb2	386966	6.93897	37.379	1.69273	0.000151389	0.00049111
ENSDARG00000102138	foxa1	30541	2.14179	25.3115	2.0847	3.0299e-05	0.000108424
ENSDARG00000032317	tox	569666	10.4354	60.5097	2.08905	1.99185e-07	9.39305e-07
ENSDARG00000070494	pdgfra	386856	93.976	286.389	1.5611	9.75419e-19	1.15735e-17
ENSDARG00000076765	ddhd2	100321082	49.4786	229.841	1.97671	1.37888e-12	1.0428e-11
ENSDARG00000032868	pde4ba	565706	312.556	1007.22	1.64909	1.79591e-51	7.07573e-50
ENSDARG00000003257	zgc:101559	492776	78.5291	161.516	1.01055	1.04404e-05	3.97016e-05
ENSDARG00000077387	tcte1	100331698	0.469245	7.45671	1.08871	0.0189576	0.0403606
ENSDARG00000069250	uacaa	565006	79.2949	172.346	1.0769	9.4281e-08	4.6015e-07
ENSDARG00000031777	pparaa	563298	1.40773	20.8243	1.7439	0.000558205	0.00164993
ENSDARG00000075525	cln8	100136870	58.4081	135.117	1.11528	7.5758e-06	2.93859e-05
ENSDARG00000002362	ubald1a	794012	368.306	781.655	1.06973	1.99033e-19	2.47266e-18
ENSDARG00000017261	gdpd1	445504	101.118	320.715	1.58005	2.29289e-17	2.50182e-16
ENSDARG00000078659	tmem176	571908	0	14.5391	1.94598	2.71412e-05	9.76424e-05
ENSDARG00000078653	ralbp1		104.471	543.836	2.14794	2.64846e-14	2.32612e-13
ENSDARG00000043531	jun	335916	82.0139	750.804	3.07287	2.72273e-82	2.13685e-80
ENSDARG00000045273	tmem204	751647	14.226	36.9	1.02345	0.0140888	0.0310364
ENSDARG00000014101	pyroxd2	553066	4.81539	68.917	2.42901	2.22146e-07	1.04255e-06
ENSDARG00000041599	zgc:91860	431740	139.452	333.729	1.21919	1.33921e-11	9.33342e-11
ENSDARG00000054609	slco2b1	792084	5.13402	76.4531	2.78412	1.70851e-10	1.08402e-09
ENSDARG00000013576	gadd45bb	497646	36.5984	196.907	2.27678	7.30203e-23	1.0729e-21
ENSDARG00000071032	pnkd	497562	53.9844	283.155	2.23936	9.63957e-26	1.62674e-24
ENSDARG00000095522	si:dkey-71b5.3		25.0881	57.6985	1.06412	0.00188638	0.00507346
ENSDARG00000036107	txnipa	368359	359.959	3010.56	2.8496	3.74989e-31	8.04396e-30
ENSDARG00000076566	kank3	558407	10.3125	52.3341	1.84323	1.22173e-05	4.60022e-05
ENSDARG00000076560	apbb1	565164	101.919	304.876	1.51062	1.79321e-18	2.09963e-17
ENSDARG00000063313	plbd1	569736	25.2445	81.2757	1.35187	0.000245216	0.000769751
ENSDARG00000063314	apba2a	100330365	21.1501	88.9119	1.77274	7.02433e-08	3.47078e-07
ENSDARG00000054389	rhof	573655	8.91051	34.9633	1.23102	0.00865713	0.0200757
ENSDARG00000055160	chadla	565474	8.91051	31.8706	1.09647	0.0211675	0.044596
ENSDARG00000035471	MEGF9	795920	121.714	336.246	1.43585	2.00387e-18	2.34209e-17
ENSDARG00000009733	kif21b		224.931	466.307	1.01514	3.4224e-11	2.30384e-10
ENSDARG00000100824	FQ377603.1		1.99992	13.3208	1.15464	0.0194321	0.0412808
ENSDARG00000071375	celf5a	568052	18.2809	46.1908	1.10726	0.00325659	0.00835614
ENSDARG00000071377	hsd11b1la	393293	35.5472	81.6886	1.09736	0.000344929	0.00105586
ENSDARG00000002750	phf20a	563332	75.737	413.578	2.36543	7.49508e-48	2.72247e-46
ENSDARG00000074820	si:dkey-253d23.9		29.9243	73.0251	1.14634	0.000259022	0.000810537
ENSDARG00000060504	pfkla	570106	5.60326	25.6539	1.2676	0.00858245	0.0199356
ENSDARG00000068732	spry4	114437	59.4379	383.841	2.62777	4.30548e-43	1.36587e-41
ENSDARG00000077022	fam131a	100136860	0	15.2033	2.01113	1.86519e-05	6.85916e-05
ENSDARG00000043313	ank2b		50.0264	241.791	2.08178	1.00515e-17	1.1218e-16
ENSDARG00000074599	frmd4ba	100333566	519.812	1165.8	1.14672	3.4285e-21	4.70174e-20
ENSDARG00000020000	sh3bp4a	403082	62.3348	135.241	1.01826	4.14434e-05	0.000145585
ENSDARG00000020007	col1a2	336471	26.4453	149.328	2.0676	3.47518e-09	1.9459e-08
ENSDARG00000013168	jag1b	140423	5.12166	36.5161	2.06997	3.82341e-06	1.53329e-05
ENSDARG00000009473	ppardb	30754	261.642	774.5	1.52097	1.85236e-24	2.97198e-23
ENSDARG00000015860	mtmr9	565063	198.243	456.897	1.1711	3.66969e-13	2.89515e-12
ENSDARG00000021833	ahr2	30517	121.724	293.19	1.18319	1.1872e-08	6.33711e-08
ENSDARG00000040133	ackr4b	641390	6.07251	91.4574	2.97837	9.7314e-14	8.03766e-13
ENSDARG00000013838	sulf2b	322056	136.243	1014.05	2.81922	1.90312e-104	2.0777e-102
ENSDARG00000067509	slc24a4b	100334346	0.938489	10.2278	1.05487	0.0237198	0.0493907
ENSDARG00000061904	fhod3b	570795	62.4497	148.409	1.17397	1.31463e-05	4.92342e-05
ENSDARG00000057859	hoxd10a	30404	1.17311	11.0168	1.07043	0.0240338	0.0499753
ENSDARG00000025641	gli2a	30154	132.825	361.247	1.4039	1.67329e-16	1.71201e-15
ENSDARG00000012016	hpgd	565975	5.40758	63.4646	2.3843	1.40063e-07	6.73171e-07
ENSDARG00000037895	ramp2	566313	7.89639	20.7143	1.00407	0.0240407	0.0499845
ENSDARG00000057272	slc30a9	497184	574.359	1682.51	1.55216	5.86887e-71	3.81028e-69
ENSDARG00000100908	lcor		12.0712	75.3616	2.08027	7.45451e-08	3.6759e-07
ENSDARG00000028228	zbtb18	100003157	566.024	1278.59	1.16332	6.73789e-29	1.31278e-27
ENSDARG00000014910	panx1b	567417	9.0968	54.2745	1.55392	0.00093805	0.00266599
ENSDARG00000043011	chst14	404732	179.667	432.272	1.25802	2.08369e-18	2.43392e-17
ENSDARG00000006497	rtn1a	323706	53.553	135.61	1.23994	4.2797e-07	1.94996e-06
ENSDARG00000092724			7.0903	32.2141	1.66598	0.000128591	0.000421491
ENSDARG00000000796	nr4a1	431720	190.638	659.504	1.72959	6.58783e-34	1.55295e-32
ENSDARG00000093456	oip5-as1		93.9126	274.616	1.47107	6.40367e-16	6.27855e-15
ENSDARG00000032083	dpysl2b	553412	18.0284	44.9483	1.01822	0.0086272	0.0200229
ENSDARG00000030839	tescb	402993	55.7901	240.233	2.02015	2.73648e-24	4.3406e-23
ENSDARG00000009881	ier5	359827	126.579	366.115	1.48354	1.68509e-22	2.45198e-21
ENSDARG00000014233	sept8b	571702	0	11.1241	1.53427	0.000267839	0.000835586
ENSDARG00000006301	raph1a	557435	663.833	1566.05	1.22834	3.51095e-46	1.21651e-44
ENSDARG00000006307	shisa4	550567	15.1002	108.312	2.53054	5.05976e-15	4.63998e-14
ENSDARG00000089860	atxn7l1	100536590	17.737	76.596	1.46081	0.000978536	0.00277139
ENSDARG00000038834	etfdh	447859	283.954	631.335	1.13137	2.57784e-19	3.1763e-18
ENSDARG00000021607	negr1	445374	127.802	290.765	1.15323	9.52549e-11	6.19458e-10
ENSDARG00000103443	vwde	767804	0	26.168	2.51306	5.4119e-07	2.43573e-06
ENSDARG00000060977	zgc:153018	767701	4.04896	26.1475	1.60997	0.000799822	0.00230159
ENSDARG00000060978	atp2a3	568671	499.507	1039.96	1.05041	1.39633e-30	2.92465e-29
ENSDARG00000086223	si:ch73-144d13.4		6.01103	32.0972	1.51247	0.00126366	0.00350924
ENSDARG00000077474	pla2r1	100538038	6.35733	25.2956	1.12894	0.01948	0.0413691
ENSDARG00000089413	mbpb	368319	242.721	653.246	1.42106	4.06547e-26	6.98132e-25
ENSDARG00000073684	quo	321031	13.8885	276.365	3.82283	2.55021e-43	8.16986e-42
ENSDARG00000073688	nav2a	100333160	25.6447	140.987	2.06529	5.59301e-10	3.39437e-09
ENSDARG00000034588	scn4ab	564977	1.40773	29.6027	2.1074	3.50354e-05	0.000124348
ENSDARG00000071863	itgb1a	556734	24.0591	112.919	1.98719	8.81214e-12	6.22585e-11
ENSDARG00000045768	cry1aa	100003956	15.4901	182.09	3.03372	8.88346e-21	1.1858e-19
ENSDARG00000045760	prmt8b	564110	11.547	33.8378	1.2116	0.00418833	0.0104947
ENSDARG00000008912	slc8a2a	569480	3.96856	20.4487	1.47218	0.00199381	0.00533448
ENSDARG00000016348	dip2bb	568954	8.67588	36.4008	1.3035	0.00530409	0.0130151
ENSDARG00000093831	znf1121		0.888283	10.774	1.09825	0.0162317	0.0351703
ENSDARG00000044144	wapla	553345	115.679	367.59	1.59678	1.28786e-17	1.42997e-16
ENSDARG00000033802	cyp27a7	402831	0	17.6186	2.24671	4.92004e-06	1.94986e-05
ENSDARG00000017565	itk	798906	6.35733	30.0482	1.36503	0.00391705	0.00987575
ENSDARG00000094332	vgll4a	101886496	18.0877	40.8275	1.01271	0.00659866	0.0158164
ENSDARG00000051965	btr01	563047	14.6509	45.9722	1.36055	0.000215031	0.000682608
ENSDARG00000051962	mmp15a	561041	11.4052	31.8878	1.15252	0.00567071	0.0138176
ENSDARG00000037639	nkx3.2	337865	8.02222	29.9087	1.17494	0.0124646	0.0278668
ENSDARG00000062040	atp8b5a	100330945	4.71498	22.6281	1.20933	0.0136053	0.0301035
ENSDARG00000004111	esr1	259252	10.6645	57.9727	1.68632	0.000136307	0.000445139
ENSDARG00000103840	lrrc8db	563923	49.2393	158.501	1.54916	1.43685e-10	9.19415e-10
ENSDARG00000026028	ankrd44	561373	558.72	1357.53	1.2665	2.10651e-49	7.90123e-48
ENSDARG00000102074	CR388416.1		1.48047	12.5491	1.13295	0.0172247	0.037071
ENSDARG00000035966	pgr		6.3137	35.5502	1.7434	0.000139807	0.000456111
ENSDARG00000036305	phf23b	100004597	721.759	1481.41	1.02639	7.7153e-40	2.2075e-38
ENSDARG00000060586	ctdspl2b	323089	449.907	1031.9	1.16883	1.81181e-28	3.42754e-27
ENSDARG00000083046	AC024175.19		3.85689	62.4301	3.0641	1.57981e-12	1.18924e-11
ENSDARG00000070601	RASSF5	100150414	125.743	392.882	1.57081	6.93459e-20	8.8169e-19
ENSDARG00000088967	wnk4b		30.8115	81.1637	1.28506	2.88023e-05	0.000103333
[truncated: 29 more rows]

## Sheet: down
Down-regulated genes
geneID	geneName	NCBI_gene_ID	PG_meanCount	PV_meanCount	log2FoldChange	pvalue	padj
ENSDARG00000059349	homer2		335.967	150.114	-1.13657	6.61729e-14	5.56913e-13
ENSDARG00000059347	calml4b		225.298	77.6977	-1.4609	6.4283e-14	5.41707e-13
ENSDARG00000089039	zgc:173585	100124605	18.8836	1.97249	-1.60561	0.00124182	0.00345348
ENSDARG00000041300	drc3	777619	13.1723	0	-1.91343	3.2587e-05	0.000116101
ENSDARG00000099044	BX548000.2		33808.6	10573.6	-1.67343	8.80056e-281	3.18483e-278
ENSDARG00000096876	CR847984.1		126.121	43.6495	-1.41696	1.66835e-08	8.78072e-08
ENSDARG00000071727	si:dkey-37o8.1	407641	16355.1	5082.98	-1.68142	0	0
ENSDARG00000068874	si:ch211-250m6.7		12.8052	2.17785	-1.22533	0.0135696	0.0300313
ENSDARG00000068870	fance	565685	663.971	225.278	-1.51435	6.45904e-26	1.0995e-24
ENSDARG00000094744	CR354435.7	560238	29.0982	8.51138	-1.26887	0.00371166	0.00940891
ENSDARG00000090149	zgc:163040	100038789	24.1933	7.13476	-1.15547	0.0136608	0.0302161
ENSDARG00000095463	si:ch73-90k17.1		30121.5	14199.3	-1.08354	3.62936e-200	8.34412e-198
ENSDARG00000097754	CR749763.7		85.2401	31.2614	-1.25304	6.57185e-05	0.000224837
ENSDARG00000076027	kif5c	565563	113.334	26.9339	-1.90675	3.41238e-12	2.50224e-11
ENSDARG00000092033	si:dkey-239h2.3		203.72	61.6948	-1.62551	7.00533e-15	6.3822e-14
ENSDARG00000098168	Metazoa_SRP		60.5189	2.524	-3.06205	1.35324e-10	8.68191e-10
ENSDARG00000094273	si:dkey-3k20.4		133.707	50.4137	-1.31712	1.52345e-08	8.05064e-08
ENSDARG00000094279	si:dkeyp-20g2.3		53.7172	7.1374	-1.48202	0.00192259	0.0051616
ENSDARG00000091001	mycbp		925.983	342.541	-1.40587	2.13136e-30	4.43097e-29
ENSDARG00000079043	si:dkeyp-75b4.10	100320899	32.0711	1.68002	-2.0132	3.49822e-05	0.000124182
ENSDARG00000088932	si:dkey-240e12.6	557168	15082.8	6263.21	-1.25912	2.61613e-64	1.44013e-62
ENSDARG00000090929	si:dkeyp-98a7.3	564145	3348.47	1652.5	-1.00814	1.02252e-36	2.63965e-35
ENSDARG00000063713	syngap1a	100034485	181.057	43.9067	-1.87221	9.56171e-12	6.73837e-11
ENSDARG00000104314	nrg1	796461	1575.69	613.341	-1.3547	3.30309e-45	1.11484e-43
ENSDARG00000105043	si:dkey-152b24.6	100002310	23770.3	8175.63	-1.53624	0	0
ENSDARG00000089525	si:ch211-250e5.9	798039	3628.46	1694.21	-1.09244	1.65595e-83	1.354e-81
ENSDARG00000042063	si:ch211-145c1.1	563686	7994.02	3484.14	-1.19384	6.70618e-131	9.42822e-129
ENSDARG00000091525	zgc:173552	794406	29.5762	11.3388	-1.04889	0.013632	0.0301559
ENSDARG00000093794	si:rp71-79p20.2		10.008	0.869491	-1.16697	0.013125	0.0291663
ENSDARG00000055656	pdzd3b	566852	31.1079	5.65449	-1.61789	0.000505534	0.00150299
ENSDARG00000098129	si:dkeyp-97a10.2	100005159	36.2692	2.46768	-2.47305	3.05564e-07	1.411e-06
ENSDARG00000011926	tpgs2	431755	116.079	43.691	-1.2986	3.54165e-07	1.62773e-06
ENSDARG00000063150	nrxn2b		169.674	59.5918	-1.41536	9.04104e-09	4.88606e-08
ENSDARG00000003877	pbrm1	565366	689.475	240.876	-1.49899	5.18963e-28	9.65865e-27
ENSDARG00000102487	Metazoa_SRP		34.7695	6.0745	-1.65753	0.00032209	0.00099107
ENSDARG00000003599	rpl3	322571	24141	11202.5	-1.1041	6.72647e-126	9.06543e-124
ENSDARG00000097941	si:ch211-207d10.2		76.5725	28.1764	-1.30435	2.00064e-05	7.32124e-05
ENSDARG00000079274	prss59.1	322453	65.2735	9.30437	-2.09718	1.242e-06	5.32146e-06
ENSDARG00000074604	phc3	558094	962.237	402.225	-1.24215	4.29415e-39	1.1903e-37
ENSDARG00000078603	myo1hb		476.732	213.942	-1.12334	8.05158e-13	6.20197e-12
ENSDARG00000009544	cldnb	81581	24.3636	7.14802	-1.23283	0.00585801	0.0142243
ENSDARG00000096159	si:dkeyp-98a7.3	564145	4196.42	2042.88	-1.03104	7.07053e-68	4.33142e-66
ENSDARG00000096153	si:dkey-21h14.9		9.72316	1.36335	-1.18478	0.0147221	0.0322569
ENSDARG00000054584	FO681288.1	100002134	60.328	26.024	-1.03821	0.00296975	0.00768774
ENSDARG00000103526	Metazoa_SRP		39.1487	6.6717	-1.91969	5.15604e-06	2.03925e-05
ENSDARG00000105277	cnksr3	100003037	15.4861	1.15932	-1.4644	0.00262195	0.00686563
ENSDARG00000105273	FP074902.3		303.927	84.3154	-1.75597	1.17839e-17	1.3099e-16
ENSDARG00000086650	BX649444.1	101885759	64.6763	23.4516	-1.29028	5.82276e-05	0.00020049
ENSDARG00000101384	Metazoa_SRP		32.2181	4.99035	-1.78128	0.000106338	0.00035293
ENSDARG00000044514	st6gal1	445376	1783.04	622.969	-1.49886	4.06541e-71	2.65707e-69
ENSDARG00000093345	si:ch73-27e22.7	100005035	237.134	83.5791	-1.45048	2.57731e-15	2.42143e-14
ENSDARG00000078069	rrm2	30733	25376.3	12372.9	-1.00543	1.53579e-09	8.95091e-09
ENSDARG00000078394	CABZ01059627.1		26218.5	10004.5	-1.38768	8.15056e-279	2.89597e-276
ENSDARG00000040161	zgc:92287	436879	4575.13	2186.91	-1.05257	6.94028e-24	1.08069e-22
ENSDARG00000019185	slain1a	560157	39.5267	12.1854	-1.30969	0.0015305	0.00418952
ENSDARG00000097011	hbaa1	30507	477.925	183.508	-1.26933	1.54853e-06	6.56142e-06
ENSDARG00000070254	si:dkey-261m9.19	100005210	24.1856	8.74621	-1.0227	0.0236917	0.0493533
ENSDARG00000060845	antxr1d	563132	15.8087	1.04669	-1.45927	0.00259727	0.00680646
ENSDARG00000103756	CR388184.2		14.7739	1.8317	-1.18319	0.0137851	0.0304463
ENSDARG00000042839	dph6	503603	448.918	143.949	-1.5915	1.42165e-25	2.38676e-24
ENSDARG00000081270	rn7sk		80.9353	27.4801	-1.36142	2.66102e-05	9.58203e-05
ENSDARG00000098591	tubb2b	641421	12132	5891.95	-1.03822	5.24852e-117	6.5329e-115
ENSDARG00000095741	ddx41	108004520	40730.2	17316	-1.23148	7.38739e-238	2.25569e-235
ENSDARG00000022007	SPEF1	393499	461.487	209.39	-1.10864	1.37938e-13	1.1241e-12
ENSDARG00000014670	colgalt2	100003546	28.3674	2.60847	-1.48752	0.00179332	0.00484584
ENSDARG00000003519	aprt	393641	1366.05	574.845	-1.21851	1.47348e-14	1.31844e-13
ENSDARG00000007465	tdrd1	553522	9178.93	4117.58	-1.15524	6.01904e-225	1.68034e-222
ENSDARG00000088898	caln1	562420	29.5791	9.68824	-1.25374	0.00240201	0.00633555
ENSDARG00000088891	slc23a3		83.5908	26.7163	-1.42949	8.49516e-06	3.27441e-05
ENSDARG00000088895	BX649337.1	564145	2521.43	1061.13	-1.04298	0.00410133	0.0102968
ENSDARG00000052917	si:ch211-202f3.3	553353	96.7136	37.3532	-1.24684	9.84109e-06	3.75688e-05
ENSDARG00000005172	dynll2b	572690	2123.86	571.83	-1.86556	1.94921e-80	1.47641e-78
ENSDARG00000088795	engl	100535410	33.9747	7.8082	-1.15379	0.0165521	0.035781
ENSDARG00000095281	zgc:152652	751595	262625	100289	-1.38764	0	0
ENSDARG00000092109	BX511093.1		152.627	72.1383	-1.01168	7.14492e-06	2.77973e-05
ENSDARG00000003216	anxa2a	325557	200.147	75.49	-1.29942	1.04989e-06	4.55326e-06
ENSDARG00000051959	zgc:66449	327407	2352.97	829.273	-1.49618	3.65507e-112	4.40909e-110
ENSDARG00000051957	selm	352913	669.973	296.661	-1.14489	1.64354e-19	2.04834e-18
ENSDARG00000100075	abcg2a		637.539	278.319	-1.1847	2.29991e-26	3.99155e-25
ENSDARG00000004141	zgc:92630	436969	10.1942	0	-1.54702	0.000257479	0.000805838
ENSDARG00000056462	crp2	327615	45297	19074.9	-1.24473	1.4529e-182	3.05297e-180
ENSDARG00000052375	zgc:66455	393502	6077.29	1998.96	-1.5986	9.50293e-247	2.99526e-244
ENSDARG00000100893	Metazoa_SRP		136.975	3.17619	-3.89563	3.32043e-17	3.59291e-16
ENSDARG00000103046	rest	564772	5230.74	2096.07	-1.31501	4.39358e-106	4.96296e-104
ENSDARG00000069758	si:dkey-189g17.2	567482	3934.6	1188.6	-1.72253	3.06972e-202	7.31566e-200
ENSDARG00000100535	ecm1a	100536787	57.5197	11.8631	-1.35666	0.00444681	0.0110841
ENSDARG00000055313	slc12a10.1	570849	128.947	59.7558	-1.05343	3.47695e-06	1.40299e-05
ENSDARG00000094840	GZMM	556666	11.3757	1.52169	-1.17237	0.0131464	0.0292073
ENSDARG00000076476	zgc:173770		35247.6	13378.3	-1.39661	0	0
ENSDARG00000105335	si:dkey-241l7.2	569235	42946.4	18121	-1.24021	3.85691e-104	4.16419e-102
ENSDARG00000086751	FP236812.4	541335	34.2202	12.9032	-1.09975	0.0070837	0.0168242
ENSDARG00000003904	sycp1	402797	730.374	239.441	-1.58268	3.05487e-36	7.79352e-35
ENSDARG00000102646	Metazoa_SRP		16.7822	1.36468	-1.73132	0.000648578	0.00189767
ENSDARG00000101170	rab42b	550378	346.958	144.572	-1.22001	4.50148e-15	4.14356e-14
ENSDARG00000001431	actn3b	323320	455.502	108.739	-2.0036	1.64796e-33	3.83843e-32
ENSDARG00000089340	rhobtb2b	565844	489.917	233.583	-1.05318	7.02941e-16	6.85815e-15
ENSDARG00000089966	si:zfos-1505d6.3	100333772	64154.3	23531.6	-1.44397	4.96971e-289	2.02329e-286
ENSDARG00000098076	CABZ01079495.1		93.642	27.8504	-1.58805	1.77089e-08	9.29538e-08
ENSDARG00000090870	si:ch1073-263o8.2	327151	118972	46182.1	-1.36274	1.79988e-234	5.41128e-232
ENSDARG00000060925	jarid2a	100007426	70.7619	24.2247	-1.34964	2.80467e-05	0.00010073
ENSDARG00000100145	CABZ01092282.1		71.0402	19.1244	-1.60553	4.3069e-06	1.71942e-05
ENSDARG00000039352	pald1b	560385	20.0632	3.70884	-1.09121	0.0223213	0.0467929
ENSDARG00000088713	si:ch211-226h8.14	795554	7375.71	3290.41	-1.15948	4.162e-149	7.07251e-147
ENSDARG00000051734	HIST1H2AL	560309	18.0499	4.04569	-1.35941	0.00422624	0.0105816
ENSDARG00000095174	si:ch73-243b8.4		513.576	142.362	-1.35614	0.00163756	0.00445388
ENSDARG00000090118	qdprb2	101882162	11265.6	5511.52	-1.02634	6.98163e-79	5.16799e-77
ENSDARG00000017860	rgs5b	550519	582.338	275.836	-1.05945	5.21286e-18	5.92955e-17
ENSDARG00000018921	fam84a	393590	513.875	145.075	-1.79059	9.42531e-41	2.76977e-39
ENSDARG00000035918	bzw2	393892	1015.78	498.266	-1.01613	1.00065e-25	1.6872e-24
ENSDARG00000068275	ptx3a	101887125	18.5078	2.78567	-1.49003	0.00247119	0.00650572
ENSDARG00000103599	Metazoa_SRP		15.3974	1.36468	-1.67213	0.00100717	0.00284546
ENSDARG00000102976	uncx	798510	113.948	33.3171	-1.6384	6.19017e-10	3.7359e-09
ENSDARG00000062687	kcnh7		26.1478	9.35139	-1.09117	0.0113378	0.0256231
ENSDARG00000057368	rps8b	100000836	33.4963	4.82008	-1.66895	0.000488227	0.0014553
ENSDARG00000062688	gpnmb	563348	560.807	120.548	-2.12733	3.76611e-30	7.73895e-29
ENSDARG00000091558	zgc:158494	386720	13658.2	5771.48	-1.23574	2.25518e-65	1.29239e-63
ENSDARG00000079618	sik2a	100126142	461.712	199.326	-1.17865	2.56865e-16	2.59414e-15
ENSDARG00000093040	AL935144.1		188.279	66.6729	-1.41046	2.88011e-11	1.95021e-10
ENSDARG00000090638	gp9		13.5677	0.869491	-1.48243	0.00261414	0.00684793
ENSDARG00000038166	hyal6	791189	291.025	49.5346	-2.37997	2.92335e-23	4.40124e-22
ENSDARG00000097136	CR545465.2		102.485	36.1012	-1.34773	7.38892e-06	2.87123e-05
ENSDARG00000060235	mst1ra	100002448	94.925	22.8103	-1.77073	5.20148e-08	2.60969e-07
ENSDARG00000070575	fam131bb	556725	13.0086	1.68002	-1.13046	0.0136281	0.0301505
ENSDARG00000077134	gpr158a	570001	220.195	23.6434	-2.88968	6.90376e-24	1.07586e-22
ENSDARG00000034933	chchd3b	325751	22.5804	8.58523	-1.03842	0.0173392	0.0372804
ENSDARG00000016739	LRRC4C	564462	35.0536	13.0214	-1.1237	0.0053055	0.013017
ENSDARG00000061858	zgc:153968	768292	6.70435	0	-1.11242	0.003248	0.0083361
ENSDARG00000013453	tdrd9	553222	4223.55	1964.66	-1.10159	1.63048e-109	1.91944e-107
ENSDARG00000055839	MARCH4	100000640	779.13	154.813	-2.26989	1.749e-62	9.13874e-61
ENSDARG00000100686	si:ch211-241b2.4	100150909	1281.38	621.336	-1.03284	4.60422e-23	6.87361e-22
ENSDARG00000055833	si:dkey-216e24.3	560034	2094.53	1025.03	-1.01959	2.31341e-27	4.17439e-26
ENSDARG00000060439	clcn2c	563453	2179.51	837.504	-1.36485	2.14237e-63	1.15017e-61
ENSDARG00000057096	ndr1	799352	239.446	74.798	-1.56748	7.9272e-13	6.11098e-12
ENSDARG00000053575	gpat2	558437	3491.31	1497.75	-1.22088	4.47435e-94	4.1637e-92
ENSDARG00000095908	sat1a.2	431716	2527.46	1066.88	-1.23428	7.78884e-56	3.44366e-54
ENSDARG00000103490	dpysl4	553411	212.99	74.139	-1.454	8.43936e-11	5.51026e-10
ENSDARG00000076221	zgc:198419	100006523	738.164	352.242	-1.04516	2.12527e-20	2.78926e-19
ENSDARG00000104777	MOV10L1		7230.05	3500.88	-1.03889	1.47289e-55	6.42485e-54
ENSDARG00000098414	ninl		6520.38	3142.01	-1.04995	3.38187e-113	4.13054e-111
ENSDARG00000075220	HIST1H2AL	100148591	18.4747	4.70052	-1.2043	0.0113487	0.0256392
ENSDARG00000095306	CR522881.1		41.2828	12.7436	-1.33665	0.000870066	0.00248652
ENSDARG00000014402	smc1b	797354	110.15	22.5752	-2.00175	4.73312e-10	2.8968e-09
ENSDARG00000087373	dnah5		103.885	22.695	-1.92739	5.6757e-10	3.43921e-09
ENSDARG00000094526	ksr2	569127	169.79	55.3089	-1.53157	3.4544e-11	2.32378e-10
ENSDARG00000078638	zgc:171750	100332505	106171	41170.3	-1.36522	0	0
ENSDARG00000099801	topaz1	101883830	5993.29	2794.2	-1.09889	4.52291e-107	5.19922e-105
ENSDARG00000099809	BX572620.2		53.9102	18.4801	-1.29492	0.000202569	0.000645461
ENSDARG00000104159	Metazoa_SRP		120.217	9.66272	-2.96473	1.57445e-15	1.5016e-14
ENSDARG00000071583	gtf3ab	100037394	24754.9	8354.26	-1.56281	2.54178e-302	1.15515e-299
ENSDARG00000092067	atn1	321707	44.6687	6.1874	-1.80924	0.000111942	0.000370336
ENSDARG00000061405	eva1a	767647	19.9079	6.41003	-1.11225	0.0156602	0.0340831
ENSDARG00000041248	si:dkey-241l7.6	567708	13639.1	6769.39	-1.00505	4.14514e-55	1.79213e-53
ENSDARG00000100969	tmprss13a	559754	49.8293	12.5167	-1.17885	0.0133243	0.0295622
ENSDARG00000053488	si:ch73-22a13.3	100333120	69.3476	30.8709	-1.03215	0.000672362	0.00196021
ENSDARG00000105018	lrrc20	492485	68.268	20.234	-1.33944	0.000998428	0.00282404
ENSDARG00000086075	ttc3	100329450	9503.24	3891.17	-1.28422	1.61513e-103	1.72475e-101
ENSDARG00000098070	CABZ01085140.1	101887175	33.9485	7.79224	-1.45121	0.00119983	0.00334529
ENSDARG00000092743	CU302436.5	100333134	27.1477	6.24905	-1.51969	0.000634715	0.00186073
ENSDARG00000008835	si:dkey-46g23.5	562067	53980.2	21547.3	-1.32336	2.13964e-302	9.95542e-300
ENSDARG00000051730	slc7a10b	559395	8.59259	0	-1.32927	0.000872193	0.00249114
ENSDARG00000097665	si:ch211-235m3.10		102.386	28.8636	-1.59444	3.06954e-07	1.41708e-06
ENSDARG00000028625	jph2	553333	29.3008	11.0824	-1.04	0.0125253	0.0279928
ENSDARG00000054952	si:dkey-34o23.2	606627	65.294	12.2768	-1.96515	1.52159e-07	7.28438e-07
ENSDARG00000100920	Metazoa_SRP		6.74509	0.551502	-1.08466	0.0222947	0.0467421
ENSDARG00000056551	slc22a13a		24.6473	3.56672	-1.52866	0.00151388	0.00414634
ENSDARG00000089802	akap1a	100002545	6448.94	2839.42	-1.17805	1.1868e-138	1.90102e-136
ENSDARG00000079236	si:dkey-253d23.11	100034619	35.1027	10.4826	-1.28614	0.00249497	0.00656213
ENSDARG00000094616	zgc:113984	564755	5282.89	2486.91	-1.07934	1.53305e-63	8.25312e-62
ENSDARG00000079501	si:ch211-149l1.2	571514	52.2388	19.559	-1.1478	0.00188955	0.00508057
ENSDARG00000099880	SP6	402928	61.9252	17.201	-1.32575	0.00272426	0.00711255
ENSDARG00000055973	zar1l	561189	27883.9	13564.3	-1.0366	1.68363e-133	2.47379e-131
ENSDARG00000076508	grm8b	569768	29.8632	10.6879	-1.11624	0.00991699	0.022685
ENSDARG00000100024	zgc:165551	100003969	20.9105	1.94302	-1.69095	0.00059124	0.0017419
ENSDARG00000040249	tlr18	403133	494.311	191.555	-1.34622	3.14388e-24	4.96667e-23
ENSDARG00000105508	si:dkey-23a13.21	368227	32.3534	12.0257	-1.06516	0.0100939	0.0230601
ENSDARG00000088276	zgc:92591	436997	1357.01	450.168	-1.56063	1.44346e-39	4.07043e-38
ENSDARG00000093890	CR677513.1		81.9976	36.3899	-1.06128	0.000130059	0.000426088
ENSDARG00000010434	clu	393775	39.9534	2.96286	-2.32369	1.48899e-06	6.32011e-06
ENSDARG00000010384	lpar5a	322473	13.9405	2.46636	-1.24298	0.0116185	0.0261826
ENSDARG00000098890	cyp2aa9	790957	71.1172	30.5072	-1.06911	0.00056456	0.00166749
ENSDARG00000099967	CU929143.1		5408.17	1563.59	-1.52229	1.30528e-05	4.89218e-05
ENSDARG00000037870	actb2	57935	63386.1	31546.5	-1.00473	3.85678e-119	4.95849e-117
ENSDARG00000020749	caprin2	407729	50137.6	20191.2	-1.3101	0	0
ENSDARG00000029596	trim55a	436631	76.714	14.3593	-2.10082	2.07093e-10	1.30422e-09
ENSDARG00000103785	sult2st2	777793	115.516	25.2913	-1.99961	4.80245e-13	3.75849e-12
ENSDARG00000105097	Metazoa_SRP		39.1138	6.74688	-1.84717	1.68811e-05	6.242e-05
ENSDARG00000039515	atf4a	406514	11195.5	3820.51	-1.54364	4.01926e-151	6.95083e-149
ENSDARG00000074260	HIST1H2AL	100334934	31.8059	6.7939	-1.51033	0.000948592	0.00269282
ENSDARG00000004459	unc119.2	557454	84.187	28.7454	-1.40737	3.43317e-06	1.38647e-05
ENSDARG00000093470	CT009596.1		154.092	51.4107	-1.4482	7.61709e-09	4.15095e-08
ENSDARG00000058454	dynll1	406297	3482.21	805.983	-2.09558	2.57363e-221	6.79646e-219
ENSDARG00000016936	hmcn1	559150	210.173	87.7118	-1.18272	6.89176e-07	3.06925e-06
ENSDARG00000097889	VWA5A		12.7638	2.17785	-1.1586	0.0189021	0.0402555
ENSDARG00000097886	CU104777.1		41.1061	7.01521	-1.92678	6.68279e-06	2.6119e-05
ENSDARG00000097884	CU928013.1		74.5024	27.291	-1.19445	0.00154538	0.00422374
ENSDARG00000090822	QDPR	563255	24105.5	11757.1	-1.03174	1.33859e-87	1.14231e-85
ENSDARG00000011245	esrp1	560190	72.5366	17.0174	-1.74104	1.32425e-06	5.65649e-06
ENSDARG00000067730	trpc6b	102725535	84.3009	23.8517	-1.56717	1.6327e-06	6.89863e-06
ENSDARG00000105116	p4hb	406673	28371.4	12194.1	-1.216	6.00618e-138	9.5425e-136
ENSDARG00000076129	FQ312024.1	100334807	27.9261	10.3619	-1.02613	0.0178123	0.0381963
ENSDARG00000086247	si:ch73-189n23.1		14773.6	5400.79	-1.44221	9.30393e-88	8.00957e-86
ENSDARG00000089292	adgrl1a		23.8594	6.20335	-1.19991	0.0110885	0.0251033
ENSDARG00000079700	b3galt1a	559521	32.5549	11.2033	-1.10456	0.00978869	0.0224309
ENSDARG00000055186	ccr9a	553366	79.5974	26.719	-1.1536	0.00857559	0.0199241
ENSDARG00000038271	zgc:113293	550593	1481.98	675.572	-1.1317	1.6955e-44	5.60634e-43
ENSDARG00000026049	mxf		6.57014	0	-1.08661	0.00370183	0.00938764
ENSDARG00000102946	si:ch73-167f10.1		65.677	8.59052	-2.07915	2.33422e-06	9.64585e-06
ENSDARG00000075629	IFI30	565583	28.7155	5.99002	-1.47873	0.00163486	0.00444717
ENSDARG00000096628	buc2l	100537720	17525.1	7317.66	-1.25863	4.57214e-181	9.50519e-179
ENSDARG00000015752	zap70	553615	49.2393	9.81709	-1.8886	1.85875e-06	7.77976e-06
ENSDARG00000090664	moto	100538154	1648.97	802.413	-1.03648	6.1141e-34	1.44302e-32
ENSDARG00000013343	kif26ba	569545	295.379	88.3957	-1.62896	3.69673e-11	2.47742e-10
ENSDARG00000100709	agxt2	619269	13.755	3.25137	-1.14364	0.0196902	0.0417836
ENSDARG00000102632	ubc	777766	41729.3	20537.6	-1.01996	5.34023e-105	5.92948e-103
ENSDARG00000101500	Metazoa_SRP		44.4719	4.1477	-2.50451	1.65054e-08	8.69402e-08
ENSDARG00000043236	ccna1	404206	36434.7	17256.3	-1.07619	6.98104e-193	1.56809e-190
ENSDARG00000077165	kcnj3a	100330491	6.26349	0	-1.00519	0.00568298	0.0138423
ENSDARG00000077290	mmp25a		35.7083	3.65516	-2.06709	1.40387e-05	5.24159e-05
ENSDARG00000019417	gadd45ga	402991	1181.51	202.163	-2.50364	1.07439e-102	1.12277e-100
ENSDARG00000096817	CR854832.1		494.943	204.643	-1.24658	4.98998e-21	6.76242e-20
ENSDARG00000057064	enpep	504088	14.4181	1.15932	-1.4443	0.00315932	0.00813645
ENSDARG00000029497	tfcp2l1	431761	82.9702	17.6858	-1.94638	2.04735e-09	1.17848e-08
ENSDARG00000086133	SERINC3	100535683	108.487	33.9894	-1.38172	0.000151106	0.000490274
ENSDARG00000005355	larp6	334471	29122.5	8075.66	-1.84381	2.11579e-241	6.56298e-239
ENSDARG00000039385	dlg4b	100148055	608.547	194.553	-1.60319	5.19434e-27	9.26165e-26
ENSDARG00000095867	si:ch73-132k15.2		5796.31	2205.45	-1.38367	2.04214e-85	1.7276e-83
ENSDARG00000094392	si:dkey-229d11.5	555353	163834	57651.7	-1.50419	2.75246e-301	1.22247e-298
ENSDARG00000045424	zgc:173856	561590	119527	44145.7	-1.43559	0	0
ENSDARG00000045423	si:ch211-146l10.8		100475	39456.4	-1.34754	0	0
ENSDARG00000058053	serping1	567801	169.157	69.2592	-1.22278	1.66904e-07	7.94748e-07
ENSDARG00000086819	scn1a	393101	1267.91	618.873	-1.02788	1.56338e-31	3.38334e-30
ENSDARG00000077666	evi5a	100332570	33.4141	3.39349	-2.01454	2.78423e-05	0.000100036
ENSDARG00000092057	si:dkey-90l23.1		53169.5	21573.9	-1.29897	8.53945e-294	3.62778e-291
ENSDARG00000098187	kctd14	564616	35.5865	7.6889	-1.65762	0.000110574	0.00036618
ENSDARG00000079843	si:dkey-234i14.9		214.153	63.7329	-1.65776	2.01858e-15	1.91491e-14
ENSDARG00000004232	dlb	30141	16.8364	1.57003	-1.31934	0.00580559	0.014111
ENSDARG00000097572	ptprt		79.5163	18.5835	-1.82956	2.84546e-08	1.46139e-07
ENSDARG00000078087	CNNM1		162.758	47.212	-1.66404	1.12273e-12	8.55046e-12
ENSDARG00000042129	zp3a.1	407714	92518.7	37185.8	-1.31321	0	0
ENSDARG00000097399	FP340271.1		24.9325	7.19504	-1.20001	0.00927203	0.0213798
ENSDARG00000020863	trim25l		108.226	38.4926	-1.36855	2.99488e-07	1.3849e-06
ENSDARG00000102868	si:dkey-203a12.4	100537905	19.3838	5.91484	-1.083	0.0209277	0.0441413
ENSDARG00000063731	rbm45	568524	175.362	73.0942	-1.15212	8.27338e-05	0.000278804
ENSDARG00000094055	si:dkey-88l16.3		38683.7	17579.9	-1.13732	0	0
ENSDARG00000034940	slc1a7a	100170783	94.5125	32.7977	-1.39939	2.2526e-06	9.32832e-06
ENSDARG00000014320	gucy2c		8.42891	0	-1.32231	0.000938631	0.00266726
ENSDARG00000059574	fscn2a	798075	91.9477	40.9319	-1.05377	0.000305527	0.000944416
ENSDARG00000040534	epcam	406454	21287.5	10139.2	-1.06648	1.6411e-123	2.1966e-121
ENSDARG00000067832	zgc:136336	692261	330.669	160.956	-1.00816	1.67905e-10	1.06705e-09
ENSDARG00000079276	ube2ql1	557472	365.312	114.179	-1.57533	1.81471e-13	1.46602e-12
ENSDARG00000100193	Metazoa_SRP		18.0972	3.20567	-1.38931	0.00431527	0.0107879
ENSDARG00000101579	epc1a	566686	6838.59	2949	-1.21238	2.14485e-205	5.23933e-203
ENSDARG00000052188	znf541		39.3808	7.75346	-1.36315	0.00443839	0.011066
ENSDARG00000102123	phtf2	432376	246.606	77.9928	-1.60535	8.73368e-18	9.80319e-17
ENSDARG00000036082	tph1b	415103	246.723	85.2971	-1.46869	1.09852e-13	9.01988e-13
ENSDARG00000070714	zgc:173544	793869	8765.22	2242.9	-1.96023	0	0
ENSDARG00000045932	cpeb1a	79079	169.623	29.9812	-2.3024	2.25955e-17	2.4682e-16
ENSDARG00000089719	si:dkey-108k21.11	100333437	17.0084	4.62403	-1.20002	0.0115774	0.0261072
ENSDARG00000052512	tsga10	768146	28.199	8.32356	-1.30903	0.00261719	0.00685501
ENSDARG00000021186	PTH2R		23.1272	1.04669	-2.07495	6.32247e-05	0.000216685
ENSDARG00000057142	zgc:194252	561367	29.0778	8.3812	-1.32756	0.00225853	0.00598699
ENSDARG00000022560	clcnk	393353	262.524	88.2042	-1.5125	1.2386e-13	1.01402e-12
ENSDARG00000103540	gpr132b	566903	232.969	97.0779	-1.20771	4.36732e-09	2.4198e-08
ENSDARG00000042637	tert	796551	1449.54	614.265	-1.22905	7.2135e-48	2.62507e-46
ENSDARG00000075041	fmnl2b	492608	330.586	142.337	-1.18509	9.52151e-15	8.60238e-14
ENSDARG00000100834	FP016208.1		45.9488	19.0678	-1.03993	0.00488591	0.0120678
ENSDARG00000014775	zgc:113220	568943	637.439	248.99	-1.13882	0.00154234	0.00421661
ENSDARG00000103024	zgc:175136	100136863	47773.9	21363.4	-1.15925	6.33867e-225	1.74465e-222
ENSDARG00000059252	zpcx	334011	32707.3	12744.4	-1.35871	0	0
ENSDARG00000040965	zgc:101731	447892	22.2003	5.27886	-1.39257	0.00271585	0.00709344
ENSDARG00000077587	zgc:113984	573997	72.1256	27.3913	-1.22908	0.00011768	0.000387938
ENSDARG00000074052	si:ch211-281g13.5	100148091	93.7293	40.0262	-1.12552	8.76965e-05	0.000294714
ENSDARG00000092557	AL929315.1		29.1087	3.91419	-1.98854	1.69164e-05	6.25389e-05
ENSDARG00000019706	zar1	369189	35167.9	10802.4	-1.69696	4.11869e-216	1.04529e-213
ENSDARG00000096921	CR790377.1		16.5399	2.524	-1.30787	0.00781114	0.0183446
ENSDARG00000056133	kitb	497629	7.18306	0	-1.21027	0.00197288	0.00528426
ENSDARG00000100936	CR790368.1		13867.9	5263.13	-1.38833	6.0957e-77	4.36345e-75
ENSDARG00000029569	snapc1a	393233	1368.21	621.578	-1.12588	1.35818e-39	3.84104e-38
ENSDARG00000105352	zgc:163040	100004171	33.0555	9.76606	-1.24824	0.00401035	0.0100941
ENSDARG00000105356	FP325124.1		100.373	45.9706	-1.02181	0.000201085	0.000641148
ENSDARG00000077741	zgc:175135	100537499	46594.7	20648.6	-1.17173	5.64548e-165	1.07111e-162
ENSDARG00000102510	BX537276.1		169.5	77.1836	-1.08164	1.88749e-07	8.92029e-07
ENSDARG00000039547	CR354435.1	560748	28.9065	7.39907	-1.44762	0.000920017	0.00261802
ENSDARG00000034677	scel	368684	121.424	17.1529	-2.51371	2.29363e-15	2.16115e-14
ENSDARG00000004794	ccdc146	767671	314.099	142.989	-1.09531	3.97296e-12	2.88838e-11
ENSDARG00000091205	HIST1H2AL	570115	36.7367	8.06585	-1.52646	0.000599248	0.0017639
ENSDARG00000016477	eif4a2	406760	1206.04	340.886	-1.80409	2.52379e-89	2.23167e-87
ENSDARG00000093198	C3	100331428	41.7546	4.30604	-2.19284	2.89637e-06	1.18091e-05
ENSDARG00000093195	si:dkey-261m9.6	563569	36.0098	8.69919	-1.52468	0.000384224	0.00116501
ENSDARG00000045516	itih2	406280	83.6268	26.4198	-1.47968	1.97529e-06	8.24104e-06
ENSDARG00000076826	dpp6a	100007104	102.951	45.0971	-1.10745	3.47762e-05	0.000123518
ENSDARG00000068557	htr5ab	368475	560.753	218.651	-1.3393	4.53374e-24	7.11062e-23
ENSDARG00000086218	nkd3	566577	25.5898	6.60344	-1.09495	0.0235755	0.0491321
ENSDARG00000098969	reln		93.8989	43.5205	-1.0028	0.00168509	0.00457362
ENSDARG00000089799	si:ch73-41e3.7	572312	494.42	207.3	-1.22829	7.34778e-18	8.2761e-17
ENSDARG00000017163	sinup	393399	3988.39	1671.53	-1.2429	1.69568e-55	7.38017e-54
ENSDARG00000093255	si:dkey-229d11.3		94226.8	33700.2	-1.47963	1.13805e-190	2.52725e-188
ENSDARG00000091801	CU469384.1	569051	33.3406	8.91411	-1.11311	0.0210962	0.0444728
ENSDARG00000027360	si:ch211-106h11.3	497580	12.1912	1.15932	-1.24836	0.0090516	0.0209061
ENSDARG00000088202	sh3d19	553811	3177.67	1393.58	-1.18437	2.03595e-89	1.81673e-87
ENSDARG00000036337	cers3b	100141367	15.2224	2.46768	-1.33588	0.00704629	0.0167598
ENSDARG00000077053	ppfia3	567230	319.227	126.771	-1.27592	1.00754e-13	8.30777e-13
ENSDARG00000074507	rmdn1	558162	924.759	389.245	-1.22245	2.0818e-28	3.93068e-27
ENSDARG00000042470	s1pr3a	798390	20.7649	7.40837	-1.04181	0.0215703	0.0453888
ENSDARG00000093688	CU074419.2		10.1913	0.261671	-1.46423	0.00199966	0.00534867
ENSDARG00000092337	CU467861.1		80.5117	14.2358	-2.08585	1.98743e-08	1.03846e-07
ENSDARG00000037805	lgals3bpa	677742	6.9579	0	-1.16531	0.00251545	0.00660979
ENSDARG00000011785	tbx6	192294	69.0351	19.4934	-1.53514	2.73553e-05	9.83581e-05
ENSDARG00000103224	si:ch73-350k19.1		348.8	81.7662	-2.01021	7.30511e-30	1.49015e-28
ENSDARG00000037782	sox8b	386704	172.019	79.421	-1.04447	4.8725e-05	0.000169548
ENSDARG00000104501	FP236812.9	541335	39.9264	12.1572	-1.34806	0.000666033	0.00194408
ENSDARG00000089362	grn1	553977	65.0603	23.5616	-1.11283	0.00913407	0.0210841
ENSDARG00000068461	zgc:162939	560737	379.35	162.326	-1.18561	1.30039e-13	1.0615e-12
ENSDARG00000068465	zgc:136254	678590	22427.4	7576.76	-1.56192	3.48083e-265	1.1728e-262
ENSDARG00000009267	zgc:136439	678627	212.627	96.1016	-1.09348	5.52913e-08	2.76485e-07
ENSDARG00000099076	CU467646.3		359.247	133.299	-1.38001	1.0623e-13	8.73713e-13
ENSDARG00000091728	CU302436.4	541335	36.0346	10.6786	-1.35969	0.000789846	0.00227423
ENSDARG00000041699	piwil1	368200	4087.58	1641.12	-1.31364	5.28129e-149	8.89716e-147
ENSDARG00000044212	CR735126.1		136.311	56.7433	-1.13686	0.000189084	0.000605055
ENSDARG00000098470	Metazoa_SRP		63.9928	4.97974	-2.69876	5.85131e-10	3.54013e-09
ENSDARG00000006615	hnf1ba	792391	123.42	26.5298	-2.0096	3.5084e-11	2.35848e-10
ENSDARG00000079779	radil	562363	48.8399	5.98204	-2.0621	5.33707e-06	2.10829e-05
ENSDARG00000078694	phlpp1		1210.46	527.722	-1.19015	3.80271e-32	8.46384e-31
ENSDARG00000078966	rbm15b	100136872	1624.72	744.653	-1.11631	2.54157e-43	8.15556e-42
ENSDARG00000024687	polr3g	100000978	421.781	131.261	-1.64583	5.33453e-29	1.04456e-27
ENSDARG00000105404	zmp:0000000932	796289	219.276	87.2839	-1.27587	1.99212e-11	1.36837e-10
ENSDARG00000075090	CU467646.1		368.219	140.27	-1.34521	7.47863e-14	6.26167e-13
ENSDARG00000035088	si:ch211-254c8.3		15.6935	2.02881	-1.15303	0.0149748	0.0327555
ENSDARG00000008133	foxl1	393959	39.6226	15.9293	-1.05861	0.0066538	0.0159388
ENSDARG00000007534	itln1	767684	39.5681	15.0529	-1.1324	0.00358354	0.00912198
ENSDARG00000036893	f13a1b	561287	1685.99	376.243	-2.14581	5.18258e-128	7.13226e-126
ENSDARG00000062948	wasf3b	563632	1369.91	656.753	-1.05413	3.19765e-34	7.62985e-33
ENSDARG00000102811	Metazoa_SRP		63.9928	4.97974	-2.69876	5.85131e-10	3.54013e-09
ENSDARG00000069428	slbp2	558918	28318.1	11741.3	-1.2675	4.60113e-286	1.7983e-283
ENSDARG00000069425	hsbp1a	541432	35.537	14.5646	-1.04518	0.0065127	0.0156487
ENSDARG00000077845	si:ch211-67f13.7	565426	677.758	153.82	-2.09711	8.83227e-59	4.30424e-57
ENSDARG00000077847	olfm2a	334035	613.924	203.391	-1.57639	6.95247e-34	1.63496e-32
ENSDARG00000040266	sox19b	64812	4015.98	1998.04	-1.00389	2.54422e-60	1.28806e-58
ENSDARG00000011166	cahz	30331	46.4463	16.3533	-1.20152	0.00178189	0.00481561
ENSDARG00000096596	zgc:173552	794406	107.126	33.1561	-1.53337	7.86414e-08	3.86911e-07
ENSDARG00000096595	BX296516.1		13.2025	1.15932	-1.33035	0.00583342	0.0141699
ENSDARG00000096599	AL928650.3		11.8857	0	-1.76429	7.72796e-05	0.000261588
ENSDARG00000011934	gyg1a	406831	30392.2	14904.8	-1.02398	4.45269e-84	3.65607e-82
ENSDARG00000102490	asb2b		11.5365	0	-1.44064	0.000318429	0.000981039
ENSDARG00000102492	Metazoa_SRP		38.1629	3.56936	-2.3568	3.22907e-07	1.48862e-06
ENSDARG00000055046	ponzr5	556869	16.1209	2.09337	-1.13223	0.0171595	0.0369469
ENSDARG00000075203	zgc:195212		166.651	22.8438	-2.60247	5.11238e-21	6.91392e-20
ENSDARG00000006691	rpl12	327089	16138.6	6981.75	-1.20684	2.17477e-158	4.04756e-156
ENSDARG00000014465	arhgef25b	569561	50.9645	11.6995	-1.64646	5.44794e-05	0.000188498
ENSDARG00000102888	gpr39	791773	62.218	25.7315	-1.09157	0.000864931	0.00247261
ENSDARG00000102585	fam160a1b		15.8637	2.41934	-1.35657	0.00539945	0.0132292
ENSDARG00000086408	BX950205.1		10846.8	4281.19	-1.3318	5.21068e-76	3.64972e-74
ENSDARG00000094542	si:dkey-121h17.7	555985	1594.64	684.475	-1.20997	4.06039e-52	1.63604e-50
ENSDARG00000089766	nrg3b	101882495	54.0455	14.4464	-1.55946	2.22934e-05	8.10075e-05
ENSDARG00000017229	megf10	564571	491.152	189.704	-1.33082	4.83341e-21	6.55934e-20
ENSDARG00000099137	LTBP4		6.70255	0	-1.121	0.00315928	0.00813645
ENSDARG00000091446	zgc:163040	100038789	31.7747	12.4083	-1.02124	0.0152259	0.03326
ENSDARG00000096149	CU469420.4		19.1095	1.15932	-1.82481	0.00032498	0.000999175
ENSDARG00000097238	hbba1	30217	200.79	86.2716	-1.07614	0.000701647	0.00203829
ENSDARG00000100220	Metazoa_SRP		58.399	3.78533	-2.81355	3.61566e-10	2.23669e-09
ENSDARG00000071076	ldhbb	436747	70.2679	28.1737	-1.1841	0.000155847	0.000504149
ENSDARG00000086647	chrng	100536659	29.8901	1.30836	-2.20282	1.62492e-05	6.01745e-05
ENSDARG00000101391	Metazoa_SRP		20.4168	1.10168	-2.14235	5.189e-05	0.000180017
ENSDARG00000100371	eef2b	326929	86477.5	40230.7	-1.10239	4.16542e-224	1.13056e-221
ENSDARG00000004627	panx3	100149056	297.96	96.3709	-1.5512	3.51416e-16	3.51452e-15
ENSDARG00000093357	nyap2b	100535812	54.0885	24.3347	-1.01611	0.00307808	0.00794819
ENSDARG00000093353	si:ch211-263m18.4		73270.9	30251.8	-1.27091	1.1848e-91	1.08701e-89
ENSDARG00000093886	si:dkey-167i21.2		12903.5	5552.61	-1.16654	1.77528e-09	1.02915e-08
ENSDARG00000093358	BX284697.1		320.179	131.555	-1.24293	1.56978e-14	1.40268e-13
ENSDARG00000093359	inpp5jb		27.5497	3.39349	-1.72744	0.00038191	0.00115907
ENSDARG00000055415	zp2l1	555180	58840.1	26701.7	-1.13721	8.12349e-158	1.49763e-155
ENSDARG00000070265	HIST1H2AL	554094	30.0029	11.1374	-1.06598	0.011116	0.0251627
ENSDARG00000103766	cyp2aa7		70.0053	21.2363	-1.50747	5.47329e-06	2.16035e-05
ENSDARG00000091236	cst14b.2	101886968	9.06004	0.785014	-1.14303	0.01611	0.0349492
ENSDARG00000075737	zgc:165518	100101650	110585	39760.5	-1.47397	0	0
ENSDARG00000008859	mylipa	335888	8583.15	3533.52	-1.27823	1.37895e-166	2.66807e-164
ENSDARG00000010132	dacha	192121	235.652	87.2879	-1.36343	5.47197e-12	3.91697e-11
ENSDARG00000078227	cspg4	560393	109.692	26.4788	-1.8554	9.65892e-11	6.27717e-10
ENSDARG00000046072	snx16		818.713	401.136	-1.01257	1.06212e-20	1.40675e-19
ENSDARG00000070769	foxg1a	30274	70.5582	21.1774	-1.48505	1.29236e-05	4.8456e-05
ENSDARG00000104229	Metazoa_SRP		44.1067	4.41069	-2.39273	5.9025e-08	2.94327e-07
ENSDARG00000035028	lpcat4	327566	6811.27	2957.26	-1.20012	3.56744e-118	4.52695e-116
ENSDARG00000098933	Metazoa_SRP		23.32	1.97117	-1.90587	0.000124566	0.00040912
ENSDARG00000077920	CSMD3		255.427	97.0754	-1.31117	1.75379e-08	9.21554e-08
ENSDARG00000040306	otomp	565818	59.2756	18.3903	-1.32736	0.000757108	0.00218802
ENSDARG00000093841	si:ch211-12h2.6	562920	18751.6	6491.62	-1.52243	3.37214e-120	4.39322e-118
ENSDARG00000103682	AL954715.2		1087.55	183.451	-2.51678	2.98857e-88	2.58419e-86
ENSDARG00000090768	zgc:173556	574007	177754	65393.3	-1.44043	0	0
ENSDARG00000090182	HIST1H2AL	554094	19.3252	7.03539	-1.02259	0.0233485	0.0487163
ENSDARG00000023886	cacna2d4b	100150428	16.652	4.33552	-1.14265	0.0187497	0.0399702
ENSDARG00000051923	ccnb1	58025	45545.8	19495.2	-1.22167	6.33352e-172	1.2502e-169
ENSDARG00000051925	cyb5r2	751641	15.1002	0.869491	-1.65965	0.00104648	0.00295182
ENSDARG00000063359	arsib	563783	49.8463	19.4759	-1.14814	0.00202761	0.00542045
ENSDARG00000088254	Metazoa_SRP		8.19248	0.261671	-1.32602	0.00434988	0.0108647
ENSDARG00000074865	frmpd3	798302	23.5178	8.42822	-1.06344	0.0144492	0.0317158
ENSDARG00000088923	si:ch211-12h2.8		21473.1	9142.61	-1.22421	2.56271e-67	1.54094e-65
ENSDARG00000015010	ccdc114	492767	62.4112	26.0432	-1.03332	0.00606442	0.0146781
ENSDARG00000059805	slc25a38a	767662	249.629	119.203	-1.01632	4.28215e-08	2.16736e-07
ENSDARG00000078552	grhl3	794613	19.8341	6.38319	-1.05296	0.0234874	0.0489694
ENSDARG00000095333	si:ch211-157j23.3		1955.32	664.842	-1.54266	4.58829e-100	4.67002e-98
ENSDARG00000095339	si:dkeyp-44a8.4		119.286	49.6863	-1.16039	3.99459e-06	1.59931e-05
ENSDARG00000093659	entpd5b	100334492	129.831	27.6049	-2.04132	2.78271e-13	2.21415e-12
ENSDARG00000079681	CABZ01059627.2		29490	7836.72	-1.90647	0	0
ENSDARG00000096979	NPC2	565099	15.6225	3.62304	-1.17501	0.0154955	0.033781
ENSDARG00000061365	hepacam2	558612	44.6942	13.4924	-1.33475	0.000740047	0.00214093
ENSDARG00000102653	Metazoa_SRP		22.5055	2.12153	-1.67428	0.000719598	0.00208827
ENSDARG00000024894	tbx5a	30071	41.3927	9.34209	-1.69813	2.0096e-05	7.35149e-05
ENSDARG00000032746	tnfsf10l3	562262	36.9542	16.0688	-1.00102	0.00713609	0.0169322
ENSDARG00000089331	urahb	570474	17.7654	3.0755	-1.20398	0.0140401	0.0309464
ENSDARG00000077188	atrnl1a		34.0234	13.3609	-1.0509	0.0081211	0.0189835
ENSDARG00000075962	vav3b	559145	49.6514	19.3215	-1.15432	0.00106799	0.00300643
ENSDARG00000074764	zgc:171426		52323.6	20429.4	-1.35575	0	0
ENSDARG00000092404	LCT		6.89823	0	-1.07487	0.00361792	0.0092035
ENSDARG00000008170	dbnla	431748	27.7534	1.57003	-2.01537	6.17186e-05	0.00021182
ENSDARG00000044619	birc2	373107	2805.18	1080.28	-1.27359	6.79836e-07	3.03042e-06
ENSDARG00000097129	BX537305.2		96.2276	11.0261	-2.67394	4.15447e-15	3.83317e-14
ENSDARG00000043457	gapdh	317743	46277.8	22498.9	-1.03522	2.53371e-56	1.14615e-54
ENSDARG00000098102	Metazoa_SRP		156.244	3.91287	-4.34753	7.84059e-25	1.27684e-23
ENSDARG00000027497	mast1a	796739	55.8265	20.23	-1.18066	0.00193616	0.00519304
ENSDARG00000071497	zic3	368263	23.5462	8.4269	-1.05949	0.0150912	0.0329871
ENSDARG00000003706	ryr2b	568463	737.341	247.086	-1.49798	1.31278e-13	1.07117e-12
ENSDARG00000003701	cldng	81586	41894.5	18399.8	-1.18376	5.33026e-149	8.9029e-147
ENSDARG00000007289	METRNL	100006599	653.257	314.758	-1.03032	2.70338e-18	3.14087e-17
ENSDARG00000070844	gamt	796865	186.41	69.5861	-1.29506	4.60816e-07	2.09133e-06
ENSDARG00000088764	lyplal1	503751	118.756	50.7195	-1.13494	3.81454e-05	0.000134628
ENSDARG00000105499	zgc:175135	100137125	53010	24365.1	-1.12029	4.38862e-193	9.97237e-191
ENSDARG00000098315	cyp1a	140634	210.916	88.0371	-1.20883	2.86638e-09	1.62033e-08
ENSDARG00000058771	nav1b	100005000	26.7116	7.8754	-1.31694	0.00208861	0.00557286
ENSDARG00000015543	s100a1	448856	6483.79	3044	-1.08287	9.16129e-51	3.54515e-49
ENSDARG00000074950	zgc:194114	100005599	68.8696	9.32323	-2.42506	3.98043e-11	2.6648e-10
ENSDARG00000097452	CU929070.1		114.967	51.7529	-1.07166	3.80166e-05	0.000134198
ENSDARG00000094370	si:ch211-125e6.13	566620	20114.6	7714.54	-1.37775	1.50332e-158	2.82479e-156
ENSDARG00000053877	cpdb	555848	9782.29	4838.5	-1.01322	1.63039e-132	2.36008e-130
ENSDARG00000039123	trim9	336099	299.272	132.707	-1.14544	1.54884e-11	1.07332e-10
ENSDARG00000057706	si:ch211-137i24.10	565274	36.1444	10.1808	-1.34051	0.0024661	0.0064932
ENSDARG00000054543	samsn1a	336695	44.0132	11.9035	-1.4987	0.000140665	0.000458605
ENSDARG00000005004	slc5a12	393339	26.6883	4.09403	-1.53432	0.00160461	0.00437035
ENSDARG00000039979	tecrl2b	450002	483.332	151.594	-1.6036	7.61486e-20	9.65669e-19
ENSDARG00000098875	Metazoa_SRP		126.207	8.93402	-3.21906	5.51605e-20	7.05463e-19
ENSDARG00000002597	pabpc1l	327625	21966.2	7469.43	-1.55004	7.10554e-185	1.50931e-182
ENSDARG00000098294	col5a3a	100330523	610.114	282.893	-1.08612	1.6393e-17	1.80277e-16
ENSDARG00000092383	si:dkeyp-12a9.5	561751	23.4771	6.06388	-1.34204	0.00291914	0.00757077
ENSDARG00000076727	si:ch211-247i17.1		7.0383	0	-1.08331	0.00345389	0.00882647
ENSDARG00000089913	cacna1g	563904	506.711	219.348	-1.1925	9.9045e-20	1.24954e-18
ENSDARG00000100442	cfh	553297	12.3673	0	-1.76249	6.94384e-05	0.000236652
ENSDARG00000100705	Metazoa_SRP		38.8875	2.04503	-2.64283	1.33086e-07	6.40742e-07
ENSDARG00000091754	CHCHD5	100000646	850.414	402.842	-1.06076	3.69711e-21	5.06655e-20
ENSDARG00000052748	capn1b	565106	452.649	189.26	-1.23761	6.17171e-20	7.88285e-19
ENSDARG00000034801	mylka		241.744	109.698	-1.07956	1.26388e-07	6.08944e-07
ENSDARG00000061288	kcnc4	799410	60.5444	14.5458	-1.72725	3.32613e-06	1.34518e-05
ENSDARG00000103338	Metazoa_SRP		44.1067	4.41069	-2.39273	5.9025e-08	2.94327e-07
ENSDARG00000103481	Metazoa_SRP		53.6254	5.40106	-2.3696	6.93415e-08	3.43056e-07
ENSDARG00000076230	atp10b	563932	79.4469	34.0296	-1.08632	0.000579184	0.00170818
ENSDARG00000100683	CT583625.5		53.6414	11.7452	-1.69168	2.72372e-05	9.79516e-05
ENSDARG00000036239	gatm	266799	685.253	306.096	-1.13491	6.83883e-22	9.67737e-21
ENSDARG00000087363	si:dkeyp-46h3.6		7078.74	2925.45	-1.26755	2.79713e-117	3.52655e-115
ENSDARG00000099162	BX005392.4		10.9057	0	-1.61531	0.000170156	0.000547808
ENSDARG00000040004	PKHD1L1	569167	381.299	32.1429	-3.36656	3.05784e-54	1.29905e-52
ENSDARG00000096118	ost4	100534615	2114.75	872.47	-1.25994	1.6225e-40	4.74654e-39
ENSDARG00000071596	neto1l	100331363	25.0361	9.42525	-1.02883	0.0174269	0.037436
ENSDARG00000102271	si:dkey-203a12.2	100537819	14.0096	0	-1.87376	3.26711e-05	0.000116358
ENSDARG00000102272	coro6	393367	111.596	26.9177	-1.85906	2.2636e-11	1.54723e-10
ENSDARG00000074337	cbfa2t2		14.771	2.49584	-1.20891	0.01384	0.0305503
ENSDARG00000068104	CABZ01041002.1	100535882	11.4779	1.30836	-1.11667	0.0187418	0.0399576
ENSDARG00000010332	zgc:56231	406257	33741.7	16066.9	-1.06886	1.2408e-288	4.94849e-286
ENSDARG00000075812	kcnt2	568327	85.2779	14.6007	-1.72601	0.000141542	0.000461232
ENSDARG00000075815	slc12a5a	572215	76.6536	29.4258	-1.25002	3.48857e-05	0.000123862
ENSDARG00000004447	aplnr2	793710	267.886	108.723	-1.2273	1.79425e-08	9.41546e-08
ENSDARG00000079009	abca1b	100136868	102.485	28.914	-1.38945	0.000925334	0.00263253
ENSDARG00000096097	si:dkeyp-98a7.4	564145	7313.84	3497.64	-1.0598	2.06791e-77	1.49671e-75
ENSDARG00000096095	buc	334375	51131.8	24228.7	-1.07556	9.54531e-217	2.4544e-214
ENSDARG00000096091	BX927253.2		89.6226	14.3149	-2.30335	1.72088e-12	1.29096e-11
ENSDARG00000070297	CR354435.5	541335	31.5986	9.83727	-1.26186	0.00275518	0.00718535
ENSDARG00000024560	slc4a1b	561787	15.7189	3.01918	-1.12368	0.0217114	0.0456612
ENSDARG00000101719	pargl	797792	1542.38	689.976	-1.14885	5.99195e-42	1.81824e-40
ENSDARG00000089567	si:ch211-103b1.2	556271	24587.3	9900.05	-1.31025	7.65584e-269	2.62475e-266
ENSDARG00000032246	tmtopsb	100334480	157.793	51.5541	-1.45367	9.04249e-08	4.41771e-07
ENSDARG00000040513	zgc:92313	436869	5019.45	2504.26	-1.00071	1.1233e-63	6.06398e-62
ENSDARG00000029204	tyrp1a		50.4345	8.63891	-1.96795	2.74658e-06	1.12476e-05
ENSDARG00000076771	zgc:171445	793035	81897.6	32748	-1.32137	0	0
ENSDARG00000032859	fam84b	767732	1345.46	666.608	-1.00045	5.15941e-25	8.4656e-24
ENSDARG00000014976	lims2	553696	96.2036	28.878	-1.52403	2.73785e-06	1.12142e-05
ENSDARG00000089737	zgc:163040	100038789	39.2935	15.4689	-1.09787	0.00501895	0.0123761
ENSDARG00000091411	si:ch211-214p13.9	100317238	20.4066	5.9887	-1.201	0.00972558	0.0222967
ENSDARG00000095245	si:ch211-157j23.5	101883757	129.569	38.5197	-1.5772	1.66532e-08	8.76713e-08
ENSDARG00000095241	mybl2a	100005189	2706.05	1267.31	-1.09218	1.35452e-74	9.32046e-73
ENSDARG00000093815	CR762470.1		59.8373	20.0597	-1.25272	0.00122989	0.00342274
ENSDARG00000044061	ADORA3	562364	534.435	174.508	-1.56239	7.92846e-26	1.34262e-24
ENSDARG00000017444	hal	100004331	75.913	26.5354	-1.33628	2.47954e-05	8.95992e-05
ENSDARG00000023369	mxd	360146	61.5571	14.7041	-1.78088	3.48428e-07	1.60174e-06
ENSDARG00000090738	mylka		22.9474	3.49418	-1.77591	0.000179386	0.000575341
ENSDARG00000092807	RPL41		13655.4	6772.32	-1.00726	9.04295e-81	6.90302e-79
ENSDARG00000100032	CABZ01088490.1		39.2473	8.64684	-1.3523	0.00414949	0.0104067
ENSDARG00000086859	qdprb2	101887190	49574.7	19490.3	-1.3423	5.11055e-141	8.32253e-139
ENSDARG00000100582	si:ch211-195b11.3	100334344	105.681	15.4702	-1.05315	0.0202767	0.0428838
ENSDARG00000086555	zgc:163040	794549	21.3978	6.13906	-1.19244	0.0101433	0.0231592
ENSDARG00000074070	irx5b	405792	17.5806	2.49452	-1.6374	0.000856153	0.00244999
ENSDARG00000074075	antxr1b		82.8763	31.5218	-1.24771	5.5725e-05	0.000192535
ENSDARG00000094415	si:ch211-264e16.2	563347	82.72	31.9461	-1.13083	0.00218429	0.00580753
ENSDARG00000091624	zgc:172315	792506	79.8568	28.4622	-1.31024	1.7251e-05	6.36793e-05
ENSDARG00000019763	acp5a	406801	20054.5	8550.94	-1.22561	2.97291e-103	3.15742e-101
ENSDARG00000057869	cdc42l2	556226	61.8342	24.6957	-1.12748	0.00104155	0.00293878
ENSDARG00000037861	slc2a3b	100330897	530.648	240.356	-1.11115	2.23891e-15	2.11468e-14
ENSDARG00000095705	CDPF1	563220	1995.26	860.994	-1.19899	3.55587e-56	1.59378e-54
ENSDARG00000098085	Metazoa_SRP		16.784	3.01654	-1.34618	0.00567246	0.0138201
ENSDARG00000058464	zgc:152698	567084	72.6767	26.6911	-1.29142	3.27155e-05	0.000116474
ENSDARG00000058460	cacng3a		29.4747	7.27688	-1.39123	0.0020532	0.00548361
ENSDARG00000079124	si:dkeyp-94h10.5	100000849	281.236	113.171	-1.24584	2.32552e-09	1.32803e-08
ENSDARG00000035171	btg4	378946	14821.5	5822.14	-1.34343	3.45429e-128	4.7875e-126
ENSDARG00000097151	BX324227.1		28.4881	8.16655	-1.3341	0.00180728	0.00487682
ENSDARG00000097153	CR954963.1		340.885	125.655	-1.38443	1.57552e-14	1.40717e-13
ENSDARG00000073976	CABZ01051901.1		3482.56	882.434	-1.95438	4.81914e-83	3.85966e-81
ENSDARG00000070404	fam212ab	327328	8120.52	3867.41	-1.06334	1.05037e-64	5.86465e-63
ENSDARG00000087583	zgc:171717		10935.8	3954.19	-1.46013	5.37472e-134	8.01776e-132
ENSDARG00000098752	csf3b		341.089	155.127	-1.10907	2.33299e-13	1.86773e-12
ENSDARG00000088750	otogl	555569	462.751	147.594	-1.60679	2.78665e-21	3.84038e-20
ENSDARG00000068030	si:cabz01007802.1	100150119	173.181	65.6481	-1.32705	2.35553e-09	1.34399e-08
ENSDARG00000093237	si:ch211-89o9.4	566247	377.024	173.156	-1.09123	1.30411e-12	9.88168e-12
ENSDARG00000097429	BX005461.3		57.2146	22.2549	-1.12902	0.00128099	0.0035528
ENSDARG00000097425	CU638870.1		78.7357	25.6401	-1.41933	7.07996e-06	2.75611e-05
ENSDARG00000097427	BX569790.2		27.9592	9.77139	-1.12086	0.0100966	0.0230608
ENSDARG00000104388	stag3		1191.03	254.964	-2.19292	3.72971e-108	4.33846e-106
ENSDARG00000092885	zgc:171977	100124621	119252	47473.3	-1.32704	0	0
ENSDARG00000092887	si:dkeyp-46h3.3		3431.8	1517.09	-1.16583	2.27976e-56	1.03849e-54
ENSDARG00000079034	si:dkey-19b23.11	798996	147728	57490.8	-1.36034	0	0
ENSDARG00000101348	plppr5b	100093705	88.6867	29.1922	-1.42007	4.6612e-06	1.85178e-05
ENSDARG00000062880	cntn3a.1	569437	157.084	62.6826	-1.22564	1.15661e-05	4.36846e-05
ENSDARG00000088950	sycp2		67.9206	28.7345	-1.04615	0.00189215	0.00508617
ENSDARG00000100574	Metazoa_SRP		67.8762	6.33485	-2.67757	5.89967e-11	3.89498e-10
ENSDARG00000000161	itsn2a	566412	195.3	84.2945	-1.15677	1.01692e-08	5.47003e-08
ENSDARG00000033447	nxph1	437006	474.768	202.468	-1.20518	4.01542e-18	4.59691e-17
ENSDARG00000069692	col7a1l		165.494	31.2331	-2.10029	5.86193e-10	3.54546e-09
ENSDARG00000101627	ssr1	373100	5528.73	2706.34	-1.02759	2.15214e-109	2.51839e-107
ENSDARG00000094498	CR376762.1		98.2981	31.4158	-1.46836	1.04158e-06	4.52627e-06
ENSDARG00000002546	rundc3ab	393118	1684.94	660.528	-1.33721	5.12906e-57	2.40365e-55
ENSDARG00000058379	otpb	30316	98.3116	34.1183	-1.38552	6.58377e-07	2.93811e-06
ENSDARG00000096986	si:dkey-14d8.22		323.123	141.294	-1.16454	1.47818e-13	1.20161e-12
ENSDARG00000096987	CU915818.1		29.3946	3.77604	-1.77631	0.000227484	0.000718871
ENSDARG00000013351	cirbpb	678563	21955.2	10877.1	-1.01101	4.80794e-112	5.76421e-110
ENSDARG00000026611	socs3b	406596	1273.55	625.529	-1.01299	1.9413e-26	3.39025e-25
ENSDARG00000100774	cmc4	100333981	34.0998	12.7531	-1.09194	0.00712071	0.0168998
ENSDARG00000052277	cabp2b		11.6616	0	-1.70921	9.91885e-05	0.000330606
ENSDARG00000103167	si:dkey-245n4.2	101886647	121.841	57.1191	-1.02005	1.66037e-05	6.14176e-05
ENSDARG00000077171	si:dkey-46g23.2	793100	83317.7	23494.1	-1.82223	0	0
ENSDARG00000034457	si:ch211-163l21.7	567726	58.3218	21.4278	-1.14689	0.00384917	0.00972218
ENSDARG00000098617	Metazoa_SRP		90.7054	6.38187	-3.16603	3.12038e-17	3.38393e-16
ENSDARG00000011235	otx2	30501	21.6598	7.48355	-1.05005	0.0192283	0.0408745
ENSDARG00000019406	zgc:63470	393420	973.884	363.099	-1.39474	5.38879e-34	1.27491e-32
ENSDARG00000090428	ctrb1	322451	22.6612	4.23482	-1.19685	0.0142399	0.0313339
ENSDARG00000057055	ndufs8b	554100	503.106	188.909	-1.36125	1.48246e-17	1.63581e-16
ENSDARG00000087670	zgc:163040	100038789	25.8601	8.06189	-1.14271	0.0111776	0.0252903
ENSDARG00000006580	cldnd	81583	48881.8	22813.3	-1.09476	5.16815e-74	3.5068e-72
ENSDARG00000091409	zp2.6	114440	67556.6	23236.2	-1.53442	2.44432e-173	4.87417e-171
ENSDARG00000075261	timp2b	406650	72.3628	13.4818	-1.98242	1.66256e-07	7.92045e-07
ENSDARG00000070166	zgc:153499	791752	18438.3	6389.6	-1.5242	1.10952e-228	3.23616e-226
ENSDARG00000015537	gad2	550403	61.3112	25.7679	-1.08438	0.00106449	0.00299746
ENSDARG00000079791	si:ch211-176g6.2	572157	15.0001	3.7277	-1.14924	0.0187757	0.0400122
ENSDARG00000077330	SH3TC1	100535608	162.593	74.6471	-1.03695	5.70078e-05	0.00019662
ENSDARG00000071541	si:dkey-42i9.8	558811	2526.36	964.429	-1.37625	9.87284e-74	6.65293e-72
ENSDARG00000027639	zgc:165539	564373	47571.2	21746.3	-1.09641	2.71824e-11	1.84316e-10
ENSDARG00000100310	Metazoa_SRP		29.6602	0.709836	-2.77821	2.75695e-06	1.12854e-05
ENSDARG00000038720	si:ch211-14a17.7		40189.2	16287.4	-1.30131	0	0
ENSDARG00000097507	BX324164.5		208.406	83.2473	-1.25778	2.3069e-08	1.19834e-07
ENSDARG00000011769	cpm	550253	3734.01	1210.76	-1.61167	2.74053e-112	3.32642e-110
ENSDARG00000091901	CR388209.1		180.041	50.3842	-1.73183	9.71472e-15	8.76477e-14
ENSDARG00000053963	npm2b	555786	11434.5	5548.4	-1.03589	3.78269e-44	1.24029e-42
ENSDARG00000101423	cyp2y3	368352	142.704	33.803	-1.87965	4.58722e-10	2.80926e-09
ENSDARG00000101427	Metazoa_SRP		53.9935	5.96054	-2.50199	7.87099e-10	4.70814e-09
ENSDARG00000105387	si:ch211-160o17.3		18.243	1.44915	-1.58063	0.00132686	0.00366703
ENSDARG00000006200	eif4g1a	572435	21459.9	10652.1	-1.00978	7.60958e-132	1.08545e-129
ENSDARG00000026820	gc3	140426	95.3473	44.7953	-1.01106	0.000435379	0.00130875
ENSDARG00000104320	snoU85		53.2886	12.5571	-1.67508	1.35606e-05	5.07084e-05
ENSDARG00000074403	pex5lb	100332270	23.8954	4.70185	-1.39048	0.00386007	0.00974718
ENSDARG00000007614	wwox	393887	822.752	343.747	-1.24212	9.24615e-36	2.32546e-34
ENSDARG00000051814	ptprz1a		147.032	40.1915	-1.71904	1.05086e-09	6.21921e-09
ENSDARG00000098038	FP015862.3		15.6604	0	-2.12195	8.98779e-06	3.45e-05
ENSDARG00000040245	kpnb3	569455	39644.9	19046.5	-1.0557	2.73959e-225	7.75899e-223
ENSDARG00000093120	si:dkey-117m1.4	100537580	314.36	153.595	-1.01489	8.82572e-11	5.75483e-10
ENSDARG00000051770	HIST1H2AL	554094	41.6262	13.8011	-1.21286	0.00262851	0.00688003
ENSDARG00000023479	lrp13	562438	60603.1	28433.6	-1.09005	3.65106e-223	9.77385e-221
ENSDARG00000057328	cth1	30114	22428.8	10203.5	-1.13381	3.93159e-150	6.73958e-148
ENSDARG00000019815	fn1a	100005469	2610.81	1082.54	-1.26207	2.5717e-40	7.44537e-39
ENSDARG00000027143	aptx	405797	495.434	186.257	-1.36545	2.50479e-18	2.91361e-17
ENSDARG00000102113	si:ch211-193l2.7		23.3068	7.62302	-1.06174	0.0231594	0.0483734
ENSDARG00000079997	si:zfos-223e1.2		21.6059	6.96021	-1.0797	0.0183842	0.0392811
ENSDARG00000070709	wu:fi42e03	100002462	128928	44617	-1.52929	0	0
ENSDARG00000076701	b4galnt4b	559305	148.567	58.5975	-1.27074	6.9217e-08	3.42527e-07
ENSDARG00000042866	cx35.4	550380	198.458	74.1004	-1.35065	1.34418e-10	8.62656e-10
ENSDARG00000100397	pde6c	393845	11.1014	1.88802	-1.12159	0.0230625	0.0481863
ENSDARG00000030644	gnai3	100006888	31.121	12.9221	-1.0057	0.0122639	0.0274629
ENSDARG00000031598	calb1	100001650	11.8969	1.30836	-1.12835	0.0172	0.0370219
ENSDARG00000035458	atp2a1l	494489	62.8761	9.35403	-2.199	1.66365e-08	8.76073e-08
ENSDARG00000102097	nfkbiz	100001781	632.619	173.739	-1.83019	8.65992e-48	3.12814e-46
ENSDARG00000100912	zgc:162297	555865	386.318	178.751	-1.06052	2.55771e-08	1.32265e-07
ENSDARG00000009844	dusp23a	323834	125.666	35.8881	-1.65442	5.66765e-10	3.4354e-09
ENSDARG00000098720	LPL	101884800	73.9204	3.80953	-2.9351	3.18817e-10	1.97976e-09
ENSDARG00000091099	myom2b		450.225	212.783	-1.0516	2.3427e-14	2.06407e-13
ENSDARG00000090948	si:ch73-29c22.1		49.9544	16.1158	-1.38379	0.000118272	0.000389759
ENSDARG00000090941	zgc:163040	100038789	98.4524	26.812	-1.63869	2.67013e-07	1.24178e-06
ENSDARG00000078829	ccdc149a	449999	383.398	149.363	-1.30538	7.0119e-14	5.88602e-13
ENSDARG00000097023	CR786571.3		42.7779	4.24972	-2.41197	8.20217e-08	4.03035e-07
ENSDARG00000076974	pdzd7a		9.55181	0	-1.43039	0.000473824	0.00141604
ENSDARG00000103743	si:dkeyp-72e1.9	563388	56.3856	6.11756	-2.43262	1.88482e-08	9.87484e-08
ENSDARG00000006901	AEBP1	567630	277.731	108.371	-1.32127	2.2653e-14	1.99768e-13
ENSDARG00000102504	Metazoa_SRP		72.9561	10.8731	-2.23037	7.63021e-09	4.15695e-08
ENSDARG00000104829	zgc:112146	550426	422.228	158.429	-1.37954	4.62697e-23	6.90231e-22
ENSDARG00000043781	PSMB10	436816	385.324	168.915	-1.13788	1.56047e-11	1.08099e-10
ENSDARG00000088080	si:dkey-34o23.3		26.3646	8.13575	-1.25818	0.00412297	0.0103455
ENSDARG00000058419	gcn1	567890	13159.9	4792.35	-1.45553	7.31441e-260	2.3823e-257
ENSDARG00000058414	bglap	792433	108.536	46.8175	-1.12082	6.3446e-06	2.48968e-05
ENSDARG00000086956	si:dkey-241l7.3	567766	3304.51	1070.83	-1.61597	4.65585e-141	7.64576e-139
ENSDARG00000013491	map3k9	560639	31.9893	3.36269	-2.17923	3.99135e-06	1.59834e-05
ENSDARG00000091116	pkhd1l1	569261	75.682	7.74919	-2.41334	1.58904e-08	8.38136e-08
ENSDARG00000073926	synrg	555257	3386.95	1681.47	-1.00908	9.20573e-58	4.37709e-56
ENSDARG00000076831	iqck	793880	359.421	116.064	-1.58642	5.8816e-25	9.62633e-24
ENSDARG00000104204	slc1a8a	570702	51.8936	17.1906	-1.3554	0.000110883	0.000367019
ENSDARG00000076789	cx32.2	566647	34.6505	11.0341	-1.29956	0.00132433	0.00366054
ENSDARG00000004898	zp2l2		2874.48	1125.6	-1.33889	4.791e-66	2.76182e-64
ENSDARG00000089478	si:dkey-241l7.4	100124601	14859.9	4967.42	-1.57241	4.65256e-134	7.04809e-132
ENSDARG00000095294	si:dkey-200l5.4	795026	14.9631	1.91618	-1.24147	0.0105483	0.0239942
ENSDARG00000079546	BX548000.1		72796.9	26492.1	-1.45605	0	0
ENSDARG00000093249	si:ch211-226h8.11		2549.93	910.979	-1.46495	1.04938e-52	4.31727e-51
ENSDARG00000044276	spp1		12.7427	1.57003	-1.08222	0.0217306	0.0456968
ENSDARG00000028740	msnb	553434	29.068	6.05696	-1.10747	0.0218826	0.0459669
ENSDARG00000037618	ddit4	378866	985.362	447.363	-1.07593	5.74581e-07	2.57711e-06
ENSDARG00000100886	si:dkeyp-97a10.1	100537548	399.931	88.1494	-2.12007	5.78468e-35	1.42373e-33
ENSDARG00000102011	Metazoa_SRP		62.4174	7.101	-2.17882	1.22666e-06	5.2615e-06
ENSDARG00000102907	CABZ01072043.1		103.718	19.0717	-2.12655	1.02877e-10	6.66364e-10
ENSDARG00000097584	si:dkey-238d18.6		27.1372	3.68332	-1.58293	0.00112601	0.00315657
ENSDARG00000074538	si:dkey-179j5.5	100007187	289.541	115.797	-1.25123	1.88603e-10	1.19085e-09
ENSDARG00000073742	prss59.2	100535672	36.837	8.02681	-1.1816	0.014396	0.0316224
ENSDARG00000095822	BX324132.5		7.76578	0	-1.24467	0.00148143	0.00406716
ENSDARG00000092090	si:ch211-125e6.12	100126100	16422	6813.47	-1.26294	2.47343e-98	2.46611e-96
ENSDARG00000079665	gpr158b	568637	34.9615	7.62302	-1.47861	0.00133279	0.00368185
ENSDARG00000059166	slc22a13b	556601	91.3507	30.0631	-1.46766	2.90878e-07	1.34636e-06
ENSDARG00000061348	adat1	792614	467.195	211.37	-1.112	4.81525e-14	4.12175e-13
ENSDARG00000100746	nfr		768.681	377.233	-1.00842	2.40131e-20	3.1431e-19
ENSDARG00000101164	NANS		27.7814	9.55806	-1.12353	0.00835927	0.0194751
ENSDARG00000042707	cx30.3	404725	325.621	81.5595	-1.86459	2.52916e-16	2.55558e-15
ENSDARG00000098525	CU856358.1		85.1564	30.9729	-1.31203	7.03821e-06	2.74204e-05
ENSDARG00000093431	BX119909.1		15.7957	0	-2.0644	1.1026e-05	4.17577e-05
ENSDARG00000075948	slco4a1	567865	237.872	110.761	-1.0557	8.87609e-09	4.80356e-08
ENSDARG00000034403	zgc:173443	100126130	2036.2	853.398	-1.07731	0.00154947	0.00423375
ENSDARG00000059987	dnah12	799461	139.149	41.4475	-1.598	5.51375e-10	3.34938e-09
ENSDARG00000099060	zgc:111868	556628	79386.7	23367.7	-1.76295	0	0
ENSDARG00000040295	apoeb	30314	556.963	67.2327	-2.85019	2.25992e-31	4.86917e-30
ENSDARG00000093892	CR376740.1		38.1924	14.8237	-1.08767	0.00718953	0.0170408
ENSDARG00000104037	si:dkey-74k8.4	100147920	131.625	33.5625	-1.80491	3.88983e-12	2.83321e-11
ENSDARG00000104289	Metazoa_SRP		16.9109	0.813173	-1.76707	0.000547117	0.00161947
ENSDARG00000104288	hfm1	557052	93.1212	34.0564	-1.32166	2.89142e-06	1.17914e-05
ENSDARG00000103392	Metazoa_SRP		36.1961	4.03771	-1.88397	8.49711e-05	0.000285972
ENSDARG00000100155	si:ch211-217i17.1	100332150	11.8242	0	-1.75454	8.13745e-05	0.000274649
ENSDARG00000102428	BX088544.1		34.2617	12.6591	-1.14945	0.00343806	0.00878945
ENSDARG00000039697	shtn1	407656	681.83	217.084	-1.62678	3.94488e-34	9.37846e-33
ENSDARG00000098483	Metazoa_SRP		25.3624	4.12086	-1.66197	0.000407895	0.00123182
ENSDARG00000092624	si:ch73-262h23.4		217.962	99.7942	-1.08207	3.505e-09	1.96204e-08
ENSDARG00000042130	zp3a.2	558677	75985.1	29271.7	-1.37238	1.59779e-175	3.28674e-173
ENSDARG00000035699	srp19	406652	1320.88	574.165	-1.18595	1.17346e-31	2.55934e-30
ENSDARG00000093572	lamc3	558958	186.301	57.9346	-1.53556	3.65251e-08	1.86121e-07
ENSDARG00000002607	unm_sa1614	561879	98.4261	25.8697	-1.754	1.07208e-09	6.33716e-09
ENSDARG00000013598	tnfb	554167	7.11212	0.523343	-1.05668	0.0227514	0.0476025
ENSDARG00000033544	adamts15b	100002059	21.029	5.82772	-1.24927	0.00739722	0.0174754
ENSDARG00000063299	pcloa	100148002	41.8423	6.22221	-2.12098	3.96719e-07	1.81222e-06
ENSDARG00000079745	si:ch211-166a6.5	100000230	1056.14	521.865	-1.00781	1.55742e-28	2.95487e-27
ENSDARG00000019541	gpt2l		266.626	83.2627	-1.61056	2.94674e-15	2.75264e-14
ENSDARG00000097736	CR628365.1		81.5705	24.2032	-1.47096	3.10841e-05	0.000111091
ENSDARG00000104123	Metazoa_SRP		30.9231	2.14969	-2.23492	6.43234e-06	2.52259e-05
ENSDARG00000037415	dlgap1b	571372	126.216	40.5026	-1.51205	1.14968e-08	6.14187e-08
ENSDARG00000088989	si:dkey-241l7.5	565442	37409.8	14025.7	-1.41209	7.1275e-263	2.36077e-260
ENSDARG00000087452	peli3	100331601	69.1668	18.9793	-1.61364	4.75426e-06	1.88645e-05
ENSDARG00000036420	si:dkey-33c9.6	795086	475.405	217.438	-1.09886	5.11165e-16	5.05015e-15
ENSDARG00000068992	hspa8	573376	97238.5	45120.9	-1.10627	1.0051e-259	3.21994e-257
ENSDARG00000094112	slc22a21	799908	135.904	28.5777	-1.91187	1.47618e-08	7.80509e-08
ENSDARG00000043492	irf1a	678604	78.1261	27.076	-1.30555	7.71427e-05	0.000261209
ENSDARG00000093943	BX294181.2		6.97863	0	-1.04358	0.00407189	0.010234
ENSDARG00000090623	si:dkeyp-106c3.1		37.3514	11.1281	-1.36716	0.000555191	0.00164213
ENSDARG00000103164	zgc:194948	796981	49.5841	13.9754	-1.47932	0.000124357	0.000408503
ENSDARG00000020788	sla2	568515	54.7334	18.9578	-1.30156	0.000205638	0.000654812
ENSDARG00000073811	wu:fi34b01		7703.38	2705.76	-1.50551	5.66581e-285	2.12925e-282
ENSDARG00000094097	CR936321.1		119.254	27.9872	-1.833	2.21121e-09	1.26682e-08
ENSDARG00000074781	ptprt		77.5189	17.6173	-1.67457	2.39267e-05	8.6572e-05
ENSDARG00000077874	vwa10.1	557256	9.95012	0.523343	-1.31432	0.00656402	0.015751
ENSDARG00000014675	efna3a	100006460	148.092	46.109	-1.5735	2.3065e-09	1.31871e-08
ENSDARG00000099607	si:ch73-160p18.4		8878.33	3369.98	-1.39213	2.00519e-174	4.08181e-172
ENSDARG00000041623	mt2	30282	20462.5	8209.14	-1.31143	2.58311e-104	2.8044e-102
ENSDARG00000056045	GUCY2C	568219	283.673	101.616	-1.42637	4.61472e-15	4.24581e-14
ENSDARG00000004864	FOXR2	570997	1350	480.571	-1.47777	2.13624e-73	1.42967e-71
ENSDARG00000089756	traf3ip2b	386940	47.5013	17.4428	-1.2012	0.00105997	0.00298515
ENSDARG00000095486	CU467646.2	108179095	8736.81	3717.83	-1.22817	2.41403e-88	2.09667e-86
ENSDARG00000095482	CHST12	797641	12.4164	3.01786	-1.12343	0.0216187	0.045481
ENSDARG00000019660	rxfp2b	566888	303.881	60.1231	-2.1803	6.19527e-21	8.34376e-20
ENSDARG00000076040	arl15a	567657	67.4186	22.601	-1.3791	1.32312e-05	4.95144e-05
ENSDARG00000100366	si:dkey-102m7.3		449.227	81.6212	-2.36704	1.8929e-40	5.52929e-39
ENSDARG00000037373	ephb2a	562176	23.321	5.39842	-1.14472	0.017814	0.0381963
ENSDARG00000035427	surf6	394040	3129.21	718.101	-2.103	4.94175e-134	7.4286e-132
ENSDARG00000079802	aanat2	30685	202.648	60.3017	-1.65897	4.29974e-14	3.6983e-13
ENSDARG00000074016	ptgfr	571808	17.0735	4.8307	-1.10209	0.0219448	0.0460778
ENSDARG00000018871	henmt1	550540	1493.86	636.079	-1.21635	6.94184e-45	2.31497e-43
ENSDARG00000026871	uchl1	325119	20311.1	10031.2	-1.01097	2.17218e-42	6.72723e-41
ENSDARG00000076949	zgc:173837	100000337	40745.3	16813.8	-1.27429	4.26839e-202	9.93011e-200
ENSDARG00000062797	nell2b	336082	43.249	8.01751	-1.84227	1.17105e-05	4.42043e-05
ENSDARG00000076366	zgc:171446	100136837	111209	53280.7	-1.06086	0	0
ENSDARG00000100626	CABZ01080599.1	101885127	168.327	76.3641	-1.07509	1.24395e-06	5.32863e-06
ENSDARG00000085826	Telomerase-vert		11.0494	2.20469	-1.1908	0.0158584	0.0344683
ENSDARG00000034989	retsatl	677660	80858.2	40065.2	-1.01073	1.52285e-122	2.01078e-120
ENSDARG00000097677	CU207301.2		653.45	170.6	-1.89279	1.10191e-42	3.43987e-41
ENSDARG00000061221	si:ch211-157j23.2		4907.72	1751.51	-1.48013	2.6979e-157	4.92732e-155
ENSDARG00000099520	CU571163.1		43.6946	11.4647	-1.40212	0.00129916	0.00359709
ENSDARG00000003570	hsp90b1	386590	68968.6	33104	-1.05697	4.1678e-154	7.47222e-152
ENSDARG00000070755	ccr11.1	100004625	47.7181	6.55774	-2.20042	1.54906e-07	7.40683e-07
ENSDARG00000058937	cldn10a	368619	35.7487	11.3722	-1.23873	0.00261095	0.0068405
ENSDARG00000039828	zp3b	64692	78537.2	30528.6	-1.35971	2.85078e-186	6.19e-184
ENSDARG00000095594	si:dkey-184a18.5	492754	86.718	18.5874	-1.83684	2.32878e-07	1.09108e-06
ENSDARG00000099724	relt	404605	25.386	5.62501	-1.43185	0.00200559	0.00536306
ENSDARG00000099898	PSKH2	566628	206.605	87.0278	-1.19946	3.23755e-10	2.00979e-09
ENSDARG00000021239	apaf1	58131	6715.83	2257.96	-1.56705	2.93309e-211	7.25549e-209
ENSDARG00000025071	brd8	337414	7674.23	2783.35	-1.45655	1.41423e-186	3.10527e-184
ENSDARG00000101093	zgc:162971	100038783	167.659	70.1668	-1.14605	9.27023e-06	3.55144e-05
ENSDARG00000032156	zgc:171776	571939	32578.9	14569.3	-1.1586	7.37041e-220	1.92043e-217
ENSDARG00000068708	ifrd1	555178	4585.62	2270.1	-1.00861	3.00801e-69	1.89011e-67
ENSDARG00000103068	Metazoa_SRP		29.7642	2.90655	-1.74952	0.000361595	0.00110342
ENSDARG00000069540	si:dkey-30c15.2	558938	40.9944	5.76343	-1.74697	0.000222893	0.000705276
ENSDARG00000059838	myom3	559614	50.7903	12.776	-1.52793	0.000265023	0.000827461
ENSDARG00000094478	si:ch1073-75o15.4	100333730	2678.28	1261.24	-1.07831	1.29716e-70	8.36603e-69
ENSDARG00000100791	tril	448885	64.8076	15.8916	-1.74947	3.29825e-07	1.51872e-06
ENSDARG00000035506	entpd2a.1	447905	31.7954	12.4537	-1.04838	0.0117099	0.0263634
ENSDARG00000016908	zgc:171779	100126104	84122.7	32234	-1.3809	2.83717e-234	8.40059e-232
ENSDARG00000077193	nags	557716	201.652	75.178	-1.36226	4.39251e-10	2.69593e-09
ENSDARG00000075975	slc45a3	100049157	65.3921	24.1267	-1.23456	0.000174983	0.000562236
ENSDARG00000045556	OTUD7A	559455	34.3704	10.9334	-1.20708	0.00460559	0.0114361
ENSDARG00000040732	elavl2	431719	2951.71	1267.08	-1.21149	1.45454e-82	1.15547e-80
ENSDARG00000029406	h2afx	394048	1698.83	554.707	-1.595	7.5423e-68	4.59164e-66
ENSDARG00000027710	btbd16	565632	359.063	103.767	-1.70967	1.16436e-19	1.46327e-18
ENSDARG00000105484	FP325123.9		46.677	18.032	-1.11586	0.00233523	0.00617273
ENSDARG00000014208	zgc:55413	406830	5389.26	2328.98	-1.20578	3.21423e-119	4.15976e-117
ENSDARG00000093216	si:ch211-146l10.7	100537564	126071	46932.3	-1.42427	0	0
ENSDARG00000093214	si:ch211-284e13.9	566600	14.5782	2.70119	-1.15904	0.0187228	0.039926
ENSDARG00000097441	CU855930.1		89.2362	24.9935	-1.63446	3.55642e-08	1.81461e-07
ENSDARG00000101362	mibp	64674	4397.35	1417.9	-1.61952	3.54187e-87	3.00936e-85
ENSDARG00000060004	fzd7a	30369	192.073	76.2164	-1.24731	1.26731e-08	6.74631e-08
ENSDARG00000060236	dok7	557881	14.8666	2.41004	-1.27045	0.00969977	0.022248
ENSDARG00000098803	cyp2aa8	450060	59.2887	10.3659	-1.69128	0.000205022	0.000653168
ENSDARG00000098806	Metazoa_SRP		16.9571	0.681677	-1.99562	0.000239793	0.000754473
ENSDARG00000078180	sc:d0202	569842	15.6906	1.44915	-1.39208	0.0040674	0.0102258
ENSDARG00000002564	syngr1a	450047	106.251	34.8454	-1.43264	1.2132e-06	5.2095e-06
ENSDARG00000079631	si:ch211-113e8.10	555616	1047.63	478.868	-1.12074	6.56806e-35	1.6145e-33
ENSDARG00000062745	socs5b	559639	500.495	234.578	-1.0652	4.15723e-16	4.13228e-15
ENSDARG00000044251	rasgef1bb	445085	129.657	57.0615	-1.11235	1.32388e-05	4.95334e-05
ENSDARG00000099990	Metazoa_SRP		12.0606	1.72836	-1.18293	0.0152616	0.033332
ENSDARG00000093022	seph	347743	493.74	226.445	-1.08306	1.72395e-10	1.09345e-09
ENSDARG00000037746	actb1	57934	93973.1	38708.9	-1.27332	8.40529e-81	6.44142e-79
ENSDARG00000076996	si:ch73-182a11.2	566321	60.3098	11.7843	-1.73827	7.11271e-05	0.00024207
ENSDARG00000001721	oc90	568941	55.3023	21.8133	-1.01451	0.0149771	0.0327569
ENSDARG00000051879	abcc8	553281	313.736	138.399	-1.14773	3.36912e-12	2.47424e-11
ENSDARG00000045089	si:ch211-270n8.1	792467	19.2797	2.10003	-1.28763	0.00508722	0.0125223
ENSDARG00000092498	si:dkeyp-46h3.2	335411	9911.53	4591.05	-1.1088	7.42621e-174	1.49611e-171
ENSDARG00000058252	adamts15b	100001991	24.0318	5.01983	-1.16283	0.0173721	0.0373378
ENSDARG00000103347	cyp2aa3	386638	224.436	53.7078	-1.94244	5.63903e-19	6.76476e-18
ENSDARG00000092924	zgc:171474		114832	44113.7	-1.37918	0	0
ENSDARG00000098435	BX005003.1		54.5188	22.8908	-1.05281	0.00221321	0.00587964
ENSDARG00000105400	HIST1H2AL	100000783	31.5041	10.4196	-1.1448	0.00762855	0.0179719
ENSDARG00000009074	cbr4	402954	165.629	64.3801	-1.28667	5.92214e-08	2.95231e-07
ENSDARG00000069946	itga6b	541320	64.1015	22.8908	-1.26561	0.000243687	0.000765493
ENSDARG00000087319	cecr6	796113	72.0634	6.35503	-2.77301	1.92448e-12	1.43652e-11
ENSDARG00000074656	ctss2.1	554157	39237.7	16347.8	-1.26001	4.08994e-202	9.62958e-200
ENSDARG00000099821	TYMP	103910413	26.7618	7.00723	-1.41023	0.00117674	0.00328559
ENSDARG00000090237	zp2.3	114439	110346	35466.2	-1.63412	0	0
ENSDARG00000104170	si:dkey-208k4.2	570186	7126.66	3229.69	-1.12877	9.77253e-31	2.06014e-29
ENSDARG00000027618	grip2b	562290	36.5635	8.82139	-1.52156	0.000313463	0.000966807
ENSDARG00000087152	sowahd	799521	75.5951	27.2814	-1.32634	8.85693e-06	3.40366e-05
ENSDARG00000063577	klhl35	570873	1201.88	574.744	-1.04731	1.9969e-26	3.48112e-25
ENSDARG00000101934	si:ch73-358j7.2		35.7734	6.48521	-1.81682	2.33357e-05	8.45121e-05
ENSDARG00000102929	zgc:101715	447894	138.529	57.5577	-1.17659	1.03629e-06	4.50527e-06
ENSDARG00000086352	zp2.1	664700	86911.3	30409	-1.51241	0	0
ENSDARG00000031243	snai3	567724	498.981	244.017	-1.01701	2.52194e-13	2.01322e-12
ENSDARG00000074328	apba1b	565507	343.78	59.6646	-2.42285	8.23913e-40	2.34707e-38
ENSDARG00000017188	si:ch211-223m11.2	558615	6900.83	3090.34	-1.15651	9.92094e-128	1.35577e-125
ENSDARG00000079078	si:ch211-5k11.8	497162	351.873	132.849	-1.01876	0.0194352	0.0412828
ENSDARG00000092525	si:dkey-88l16.4		1184.78	454.458	-1.37155	1.46179e-32	3.27594e-31
ENSDARG00000039273	fbln5	449806	305.26	114.931	-1.36996	3.49061e-17	3.77496e-16
ENSDARG00000061989	mpnd	559169	790.18	283.71	-1.441	2.07332e-30	4.32283e-29
ENSDARG00000097044	CU468915.1		275.756	100.056	-1.41316	3.22218e-16	3.22746e-15
ENSDARG00000020871	ptprz1b	553019	1984.49	955.088	-1.05267	1.68549e-46	5.88175e-45
ENSDARG00000036237	slc27a2a	449925	61.6978	19.4933	-1.31645	0.000630484	0.00184979
ENSDARG00000102856	si:ch73-59f11.3	107988036	202.444	76.265	-1.30957	1.22523e-08	6.53301e-08
ENSDARG00000103722	FP236812.8	541335	39.1658	11.1347	-1.42973	0.000388965	0.00117884
ENSDARG00000101763	CU467646.5		5478.08	1949.26	-1.48326	4.23298e-83	3.40415e-81
ENSDARG00000101765	Metazoa_SRP		72.0245	4.84132	-2.75647	7.46867e-10	4.47434e-09
ENSDARG00000101764	Metazoa_SRP		182.771	5.54054	-4.32572	9.23906e-34	2.15969e-32
ENSDARG00000089511	si:ch73-78o10.1	792389	1468.73	604.424	-1.26249	2.87361e-45	9.73242e-44
ENSDARG00000089516	AL929192.1	100331909	2782.9	1119.35	-1.30721	4.31288e-84	3.55622e-82
ENSDARG00000075482	zgc:173587	541335	32.8532	10.3712	-1.3034	0.00122692	0.00341546
ENSDARG00000092026	zgc:173545	100003631	17456.8	8682.82	-1.00678	2.51092e-134	3.83347e-132
ENSDARG00000043877	mmachc	555267	838.585	380.441	-1.12001	1.51947e-19	1.89856e-18
ENSDARG00000017441	mylz3	58143	19.3583	4.20666	-1.15003	0.0189613	0.0403639
ENSDARG00000055852	mtnr1ab	565718	27.6494	2.55216	-1.92776	9.17954e-05	0.000307379
ENSDARG00000095963	si:ch73-361h17.1	101882127	102.892	38.6188	-1.29307	2.5538e-06	1.04978e-05
ENSDARG00000101569	ppargc1b	555906	1750.68	611.583	-1.50978	2.64728e-90	2.39505e-88
ENSDARG00000101563	CR354430.4		20.3779	3.62436	-1.5162	0.00161397	0.00439401
ENSDARG00000032318	mfsd6a	100034426	440.584	152.884	-1.48315	6.27507e-21	8.44542e-20
ENSDARG00000043912	mei4	568897	177.169	66.0757	-1.3281	4.05658e-09	2.25594e-08
ENSDARG00000037995	gdf3	30125	15312.5	6846.92	-1.15591	5.4304e-100	5.49849e-98
ENSDARG00000070498	phyhiplb	100004913	31.7747	8.4362	-1.40811	0.00131691	0.00364179
ENSDARG00000087392	si:ch73-160p18.3		241857	66956.8	-1.82859	1.23954e-60	6.3411e-59
ENSDARG00000069787	tmc6a	100149241	103.971	42.4134	-1.13925	0.000414107	0.00124942
ENSDARG00000069251	si:dkeyp-50f7.2	334036	177898	64814	-1.4557	0	0
ENSDARG00000045900	agbl5	445479	1909.54	874.678	-1.1221	5.24292e-60	2.6271e-58
ENSDARG00000021193	coro1cb	562849	180.402	58.7789	-1.51793	3.09622e-12	2.27896e-11
ENSDARG00000103576	EPHB3	555957	37.1582	6.92407	-1.70823	0.000107161	0.000355299
ENSDARG00000092810	stap2a	327172	1607.03	670.106	-1.25349	4.2334e-52	1.70225e-50
ENSDARG00000069865	grxcr1	562104	350.351	138.32	-1.31182	8.83654e-17	9.19508e-16
ENSDARG00000079340	si:dkey-175a17.4	555258	108.853	46.0219	-1.15075	1.32189e-05	4.94777e-05
ENSDARG00000009471	nid2b	570436	80.3588	25.4308	-1.45624	6.61679e-06	2.58973e-05
ENSDARG00000098700	il1b	405770	124.418	31.4115	-1.8172	1.56732e-11	1.08535e-10
ENSDARG00000098703	Metazoa_SRP		36.8698	1.7095	-2.69034	1.50268e-07	7.20091e-07
ENSDARG00000093612	si:dkey-92i17.2	563325	324.717	143.23	-1.14882	4.38206e-12	3.17399e-11
ENSDARG00000013837	spo11	402982	363.128	128.171	-1.45413	6.60353e-21	8.87525e-20
ENSDARG00000099957	CABZ01030090.1		3415.32	702.15	-2.27418	1.74552e-285	6.68843e-283
ENSDARG00000058679	zgc:114104	569093	2020.03	845.473	-1.25263	2.85582e-78	2.0902e-76
ENSDARG00000105346	zp2.2	114438	188812	62176.6	-1.59901	2.31694e-283	8.54295e-281
ENSDARG00000102693	BX005336.1		54.9426	23.1161	-1.07569	0.00136498	0.00376332
ENSDARG00000008239	mocs3	393095	432.81	202.057	-1.07422	1.72521e-13	1.39661e-12
ENSDARG00000052110	mboat4	795709	26.6283	6.7267	-1.4036	0.00162933	0.00443335
ENSDARG00000070419	nkd3l	100034538	116.995	41.642	-1.38447	5.05286e-08	2.53969e-07
ENSDARG00000089869	zgc:172218		2459.37	843.991	-1.38368	3.3397e-06	1.35011e-05
ENSDARG00000089863	ccdc57	100318317	1182.81	502.594	-1.22423	1.12181e-43	3.63556e-42
ENSDARG00000029432	tph1a	352943	595.772	290.192	-1.02702	7.27808e-16	7.09722e-15
ENSDARG00000030938	fermt3b	393878	123.129	41.3707	-1.44183	2.59734e-07	1.20966e-06
ENSDARG00000087574	nox1	555604	47.4227	5.69887	-2.38042	9.56044e-09	5.15678e-08
ENSDARG00000004219	slc6a3		80.863	21.7315	-1.63122	5.59765e-07	2.51296e-06
ENSDARG00000105139	Metazoa_SRP		60.8172	6.98039	-2.44303	8.83759e-10	5.26698e-09
ENSDARG00000086221	si:ch211-226h8.4	562338	4331.46	1734.83	-1.31035	7.38855e-75	5.10202e-73
ENSDARG00000098970	CU459186.1		22.4244	3.56804	-1.69723	0.000366636	0.00111757
ENSDARG00000091337	Metazoa_SRP		36.0921	2.85953	-2.27755	2.17171e-06	9.01244e-06
ENSDARG00000105359	FP325123.6		115.75	47.9045	-1.16385	6.84336e-06	2.67039e-05
ENSDARG00000094674	si:dkeyp-98a7.8	798111	4491.71	2002.5	-1.15631	5.02437e-64	2.75032e-62
ENSDARG00000095105	CR847899.2		33.2817	9.58089	-1.09411	0.0213181	0.0448872
ENSDARG00000010758	capn12	799247	176.988	64.2793	-1.33103	5.597e-07	2.51296e-06
ENSDARG00000009351	fgf6a	30560	102.964	27.6022	-1.6412	2.86809e-07	1.32816e-06
ENSDARG00000078186	tex2	798401	5733.7	2733.83	-1.06551	2.73299e-89	2.40577e-87
ENSDARG00000078183	zgc:165453	566238	40376.3	15529.7	-1.37545	2.79294e-185	5.99775e-183
ENSDARG00000092898	si:ch211-157j23.3		262.957	73.6871	-1.75977	6.44835e-18	7.3009e-17
ENSDARG00000052322	tlr5b	403139	31.6186	12.0821	-1.07885	0.00747731	0.0176454
ENSDARG00000102076	zgc:158852	565497	4096.78	1968.04	-1.04741	1.29032e-37	3.40749e-36
ENSDARG00000102073	Metazoa_SRP		65.0211	8.52892	-2.38905	4.36146e-10	2.67771e-09
ENSDARG00000070605	b4galnt2.2	557782	1775.37	686.756	-1.36314	1.17195e-62	6.14002e-61
ENSDARG00000104453	flt4	30121	467.764	177.894	-1.37391	1.46711e-23	2.25218e-22
ENSDARG00000086522	zp2.5	30593	105331	35062.4	-1.58334	9.35466e-278	3.26444e-275
ENSDARG00000086529	si:dkey-90l23.2		19156.4	8295.14	-1.20316	4.92859e-135	7.64401e-133
ENSDARG00000035147	lrwd1	327124	108.54	19.8084	-2.17253	6.78843e-12	4.82749e-11
ENSDARG00000098837	tgm5l	565984	43.5548	3.15865	-1.90192	7.59197e-05	0.00025735
ENSDARG00000098834	sox4b	393875	387.037	127.592	-1.53878	6.52599e-20	8.31362e-19
ENSDARG00000093924	BX890562.1		39.0174	11.987	-1.32163	0.00115329	0.00322797
ENSDARG00000097596	tac3b		39.7514	12.8482	-1.29673	0.000965925	0.00274004
ENSDARG00000091996	si:ch211-117m20.5	566658	15.9375	2.52003	-1.03005	0.023715	0.0493861
ENSDARG00000086091	kcnn4	568363	16.0812	0.840011	-1.80866	0.000470525	0.00140704
ENSDARG00000101142	si:ch211-182a13.1		16.0765	0.840011	-1.68247	0.000767454	0.0022153
ENSDARG00000073870	gdpd2	563198	215.47	67.344	-1.602	1.02788e-14	9.26083e-14
ENSDARG00000008541	chia.4	337333	20249.2	8007.23	-1.33648	0	0
